# Supplementary material for: From symmetrical tetrasulfides to trisulfide dioxides via photocatalysis
Source: Royal Society of Chemistry journal article supplement (doi:10.1039/d1gc03242a), 2021-01-01

## Supporting Information

### From Symmetrical Tetrasulfide to Trisulfides Dioxides via Photocatalysis

Kai Gong, Yilin Zhou and Xuefeng Jiang<sup>\*a,b,c</sup>

<sup>a</sup>Shanghai Key Laboratory of Green Chemistry and Chemical Process, School of Chemistry and Molecular Engineering, East China Normal University, 3663 North Zhongshan Road, Shanghai 200062, P. R. China.

<sup>b</sup>State Key Laboratory of Estuarine and Coastal Research, East China Normal University, 3663 North Zhongshan Road, Shanghai 200062, China

<sup>c</sup>State Key Laboratory of Organometallic Chemistry, Shanghai Institute of Organic Chemistry, Chinese Academy of Sciences, 345 Lingling Road, Shanghai 200032, P. R. China.

[xfjiang@chem.ecnu.edu.cn](mailto:xfjiang@chem.ecnu.edu.cn)

## Index

|              |                                                                           |            |
|--------------|---------------------------------------------------------------------------|------------|
| <b>I.</b>    | <b>General Information.....</b>                                           | <b>S2</b>  |
| <b>II.</b>   | <b>Mechanistic Study .....</b>                                            | <b>S3</b>  |
| <b>III.</b>  | <b>The Analysis of By-products .....</b>                                  | <b>S6</b>  |
| <b>IV.</b>   | <b>The General Synthetic Procedure and Data for Starting Materials...</b> | <b>S7</b>  |
| <b>V.</b>    | <b>Optimization of Reaction Conditions.....</b>                           | <b>S9</b>  |
| <b>VI.</b>   | <b>General Procedures.....</b>                                            | <b>S10</b> |
| <b>VII.</b>  | <b>Procedures and Data.....</b>                                           | <b>S11</b> |
| <b>VIII.</b> | <b>X-ray Crystallography Analysis.....</b>                                | <b>S33</b> |
| <b>IX.</b>   | <b>References.....</b>                                                    | <b>S34</b> |
| <b>X.</b>    | <b>NMR Spectra.....</b>                                                   | <b>S35</b> |

## **I. General Information**

### **NMR Spectrum:**

$^1\text{H}$  and  $^{13}\text{C}$  spectra were collected on 300 MHz, 400 MHz or 500 MHz NMR spectrometers (Bruker AVANCE). Chemical shifts for protons are reported in parts per million (ppm) downfield and are referenced to residual protium in the NMR solvent ( $\text{CHCl}_3 = \delta 7.26$ ). Chemical shifts for carbon are reported in parts per million downfield and are referenced to the carbon resonances of solvent ( $\text{CHCl}_3 = \delta 77.00$ ). Data are represented as follows: chemical shift, multiplicity (brs = broad single, s = singlet, d = double, t = triplet, q = quartet, m = multiplet), coupling constants in Hertz (Hz), integration.

### **Mass Spectroscopy:**

Mass spectra were in general recorded on a Shimadzu GCMS-QP2010 Ultra and a HP 5989A mass selective detector; Thermo Fisher Scientific LTQ FTICR-MS; Thermo Scientific Q Exactive HF Orbitrap-FTMS.

### **Chromatography:**

Column chromatography was performed with silica gel (300 – 400 mesh ASTM).

### **IR:**

SHIMADZU IR Tracer-100 Spectrometers.

### **Solvent:**

Ethyl acetate (EA, 99.9%, Extra Dry, with molecular sieves) and Tetrahydrofuran (THF, 99.9%, Extra Dry, with molecular sieves) were bought and directly used without further purification.

### **Starting Materials:**

Starting materials including the tetrasulfides and the sulfinic acids were prepared adopting the reported procedures<sup>1,7</sup> except for special emphasis.

## II. Mechanistic Study

### (a) Radical Quenching Experiments.

All reactions were operated under standard conditions with extra 2,2,6,6-tetramethyl-1-piperinedinyloxy (TEMPO). The yields were collected by isolating. ND = Not detected.

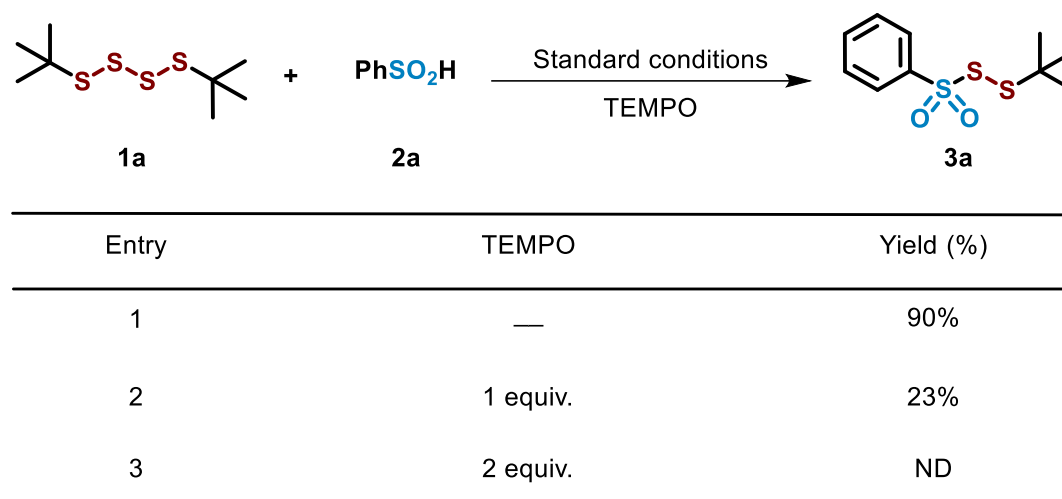

*Radical quenching experiments revealed that TEMPO could efficiently quench the process of the formation of compound 3a, suggested the radical property of this system.*

### (b) Radical Capture Experiments

Radical capture experiments were performed using a Shimadzu GCMS-QP2010 Ultra and a HP 5989A mass selective detector. Follow the reaction conditions: **1a** (0.2 mmol, 48.4 mg), **2a** (0.2 mmol, 28.4 mg), **1d** (0.1 mmol, 18.0 mg), TEMPO (0.1 mmol, 15.6 mg) [Ir(dF(CF<sub>3</sub>)ppy)<sub>2</sub>(dtbbpy)]·PF<sub>6</sub>] (1 mol%, 1.1 mg), ethyl acetate (1 mL) was stirred at room temperature under N<sub>2</sub> atmosphere and blue LEDs (460 nm, 6 W) for 6 h.

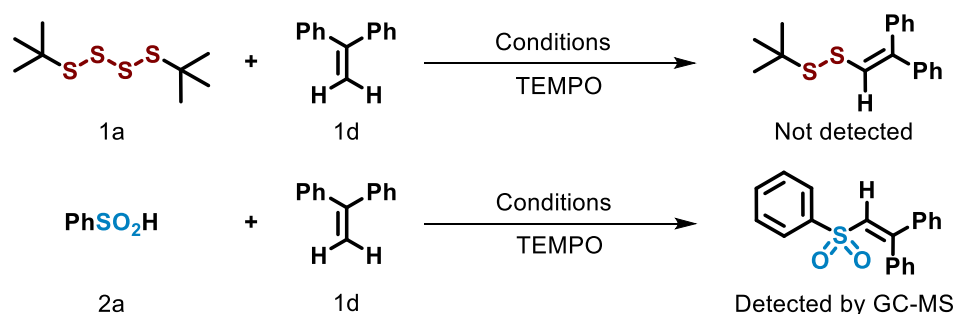

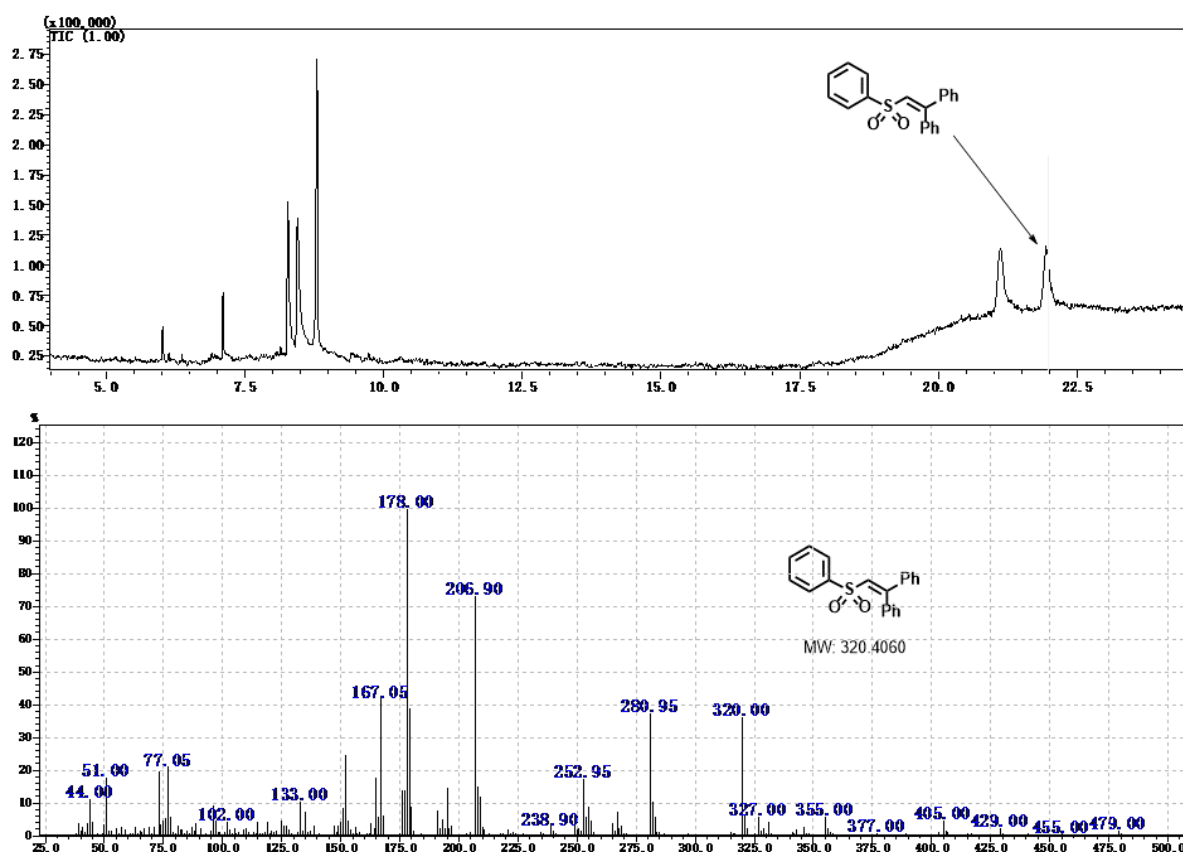

Figure S1. The capture of free radical B

### (c) Ultraviolet-Visible Absorption Experiments

Ultraviolet-visible absorption experiments were performed using a Shimadzu UV-2700 UV-visible spectrophotometer. In each experiment, the varying samples were combined in ethyl acetate in screw-top 1.0 cm quartz cuvettes. The concentration of  $[\text{Ir}(\text{dF}(\text{CF}_3)\text{ppy})_2(\text{dtbbpy})]\cdot\text{PF}_6$  was  $8.91 \times 10^{-4}$  M, the concentration of 1,4-di-tert-butyltetrasulfane and benzenesulfinic acid were 0.1 M.

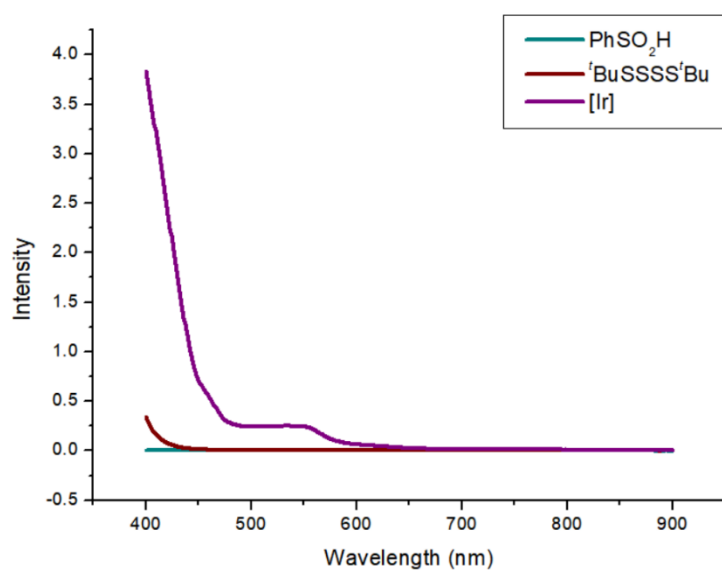

Figure S2. UV-Vis experiments of [Ir],  $t\text{BuSSSS}'\text{tBu}$  and  $\text{PhSO}_2\text{H}$ .

*Ir catalyst was approved to serve as photosensor at 530 nm.*



**(d) Stern–Volmer Fluorescence Quenching Experiments with  $[\text{Ir}(\text{dF}(\text{CF}_3)\text{ppy})_2(\text{dtbbpy})]\cdot\text{PF}_6$**

Fluorescence quenching studies were performed using a Shimadzu RF-6000 Fluorescence Spectrophotometer. In each experiment, the photoredox catalyst and varying concentrations of quencher were combined in ethyl acetate in screw-top 1.0 cm quartz cuvettes. For the emission quenching of  $[\text{Ir}(\text{dF}(\text{CF}_3)\text{ppy})_2(\text{dtbbpy})]\cdot\text{PF}_6$ , the concentration was  $2.67 \times 10^{-3}$  M, the solution was irradiated at 530 nm.

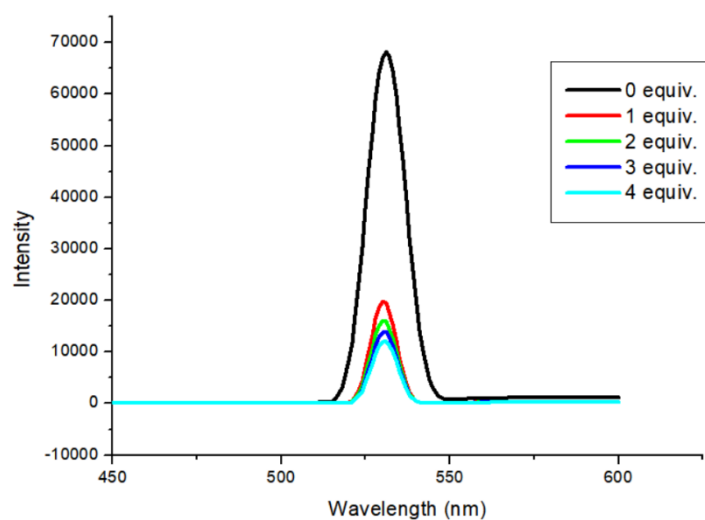

**Figure S3.** Quenching experiments of  $[\text{Ir}(\text{dF}(\text{CF}_3)\text{ppy})_2(\text{dtbbpy})]\cdot\text{PF}_6$  with PhSO<sub>2</sub>H.

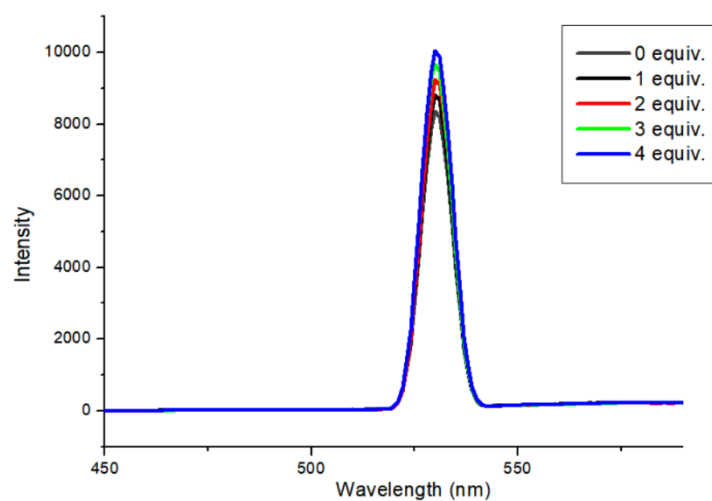

**Figure S4.** Quenching experiments of  $[\text{Ir}(\text{dF}(\text{CF}_3)\text{ppy})_2(\text{dtbbpy})]\cdot\text{PF}_6$  with 'BuSSSS'Bu

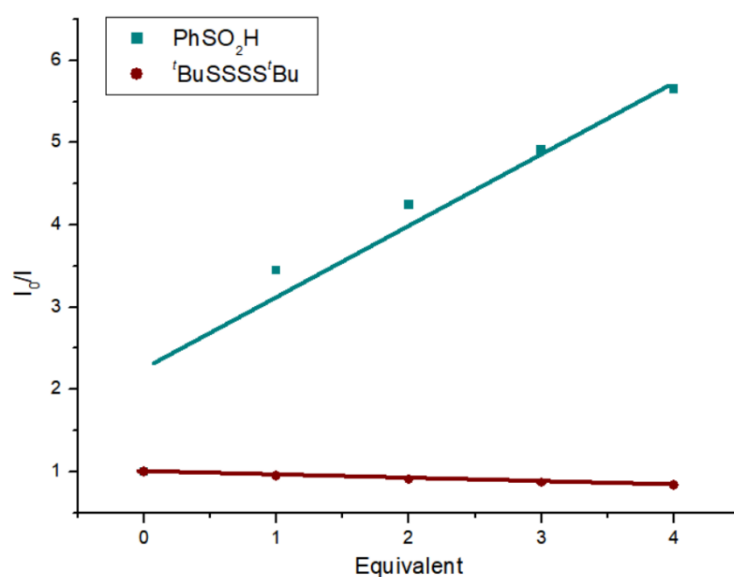

**Figure S5.** Stern-Volmer Plot of Fluorescence Quenching Experiments

The Stern-Volmer analysis revealed that the excited state of  $[\text{Ir}(\text{dF}(\text{CF}_3)\text{ppy})_2(\text{dtbbpy})]\cdot\text{PF}_6$  photoredox catalysis is efficiently quenched by  $\text{PhSO}_2\text{H}$  in ethyl acetate at room temperature.

### III. The Analysis of By-products.

GC-MS of compound **a**

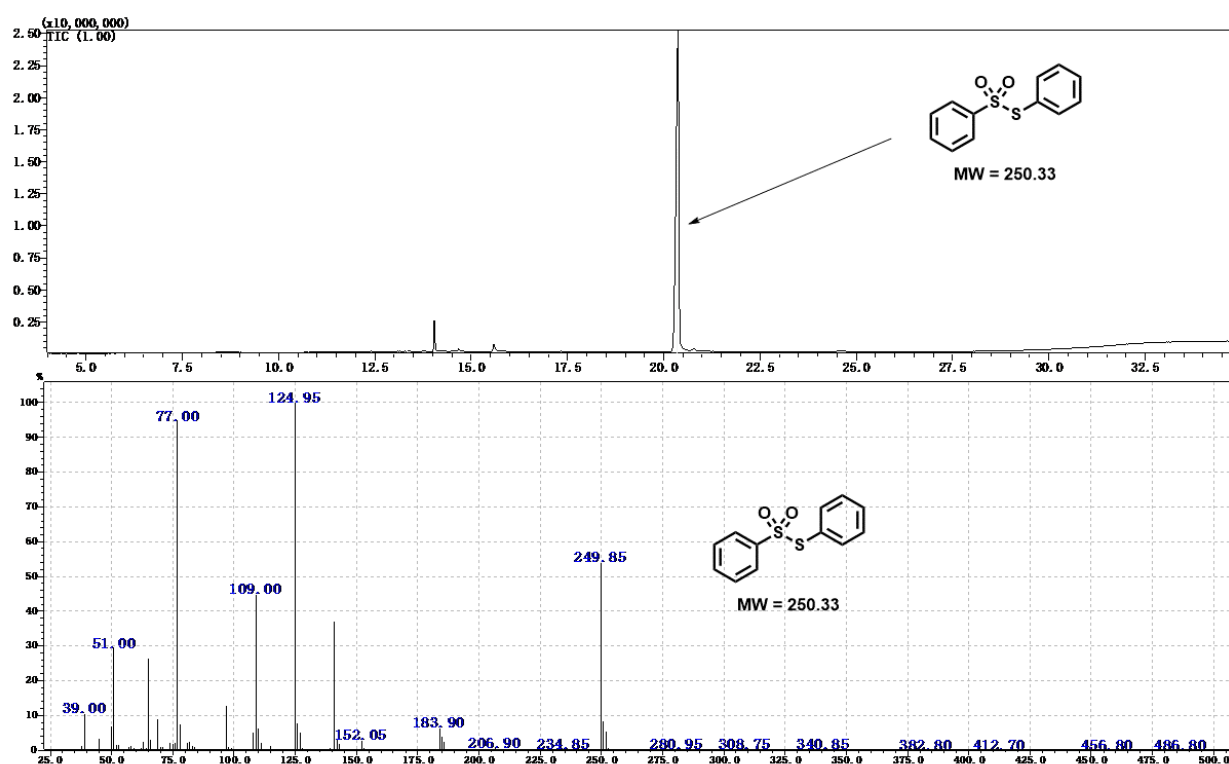

**Figure S6.** The detection of self-disproportionation product of benzenesulfinic acid **a**

## GC-MS of compound **b**

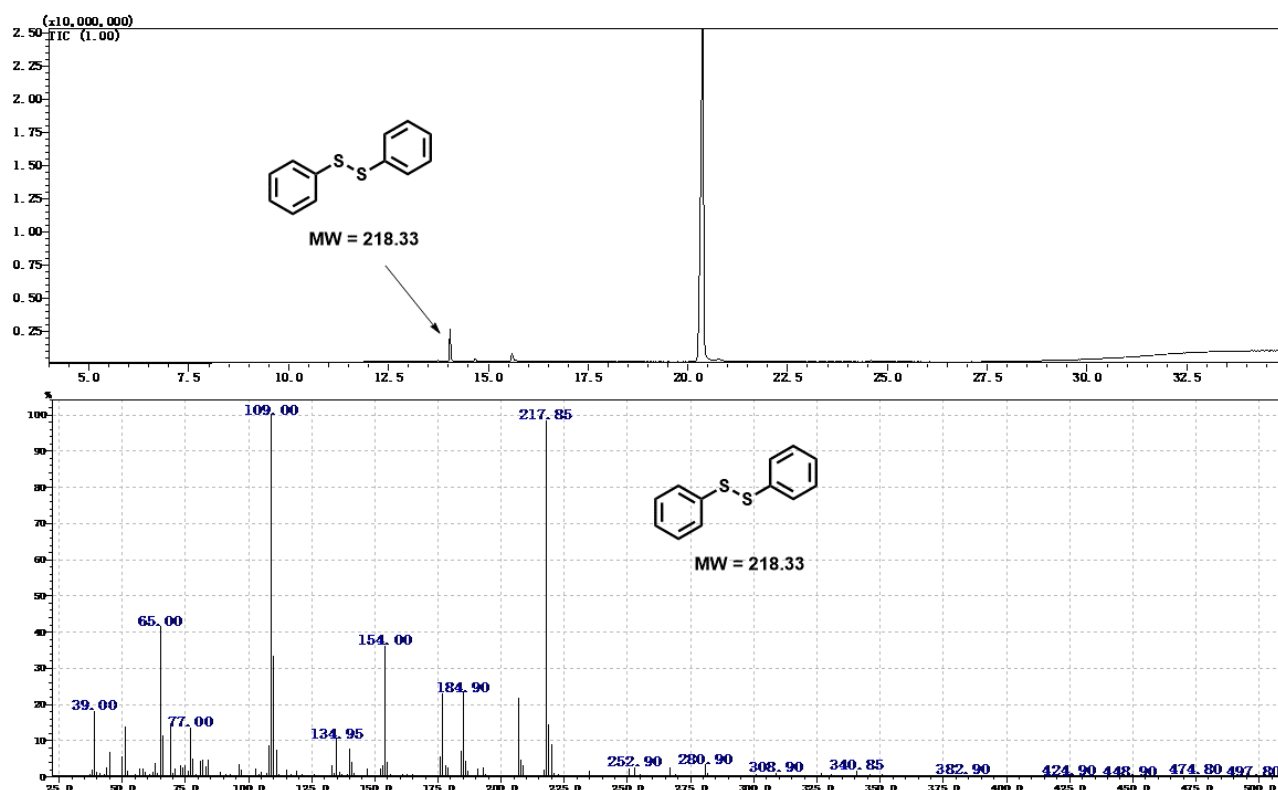

Figure S7. The detection of compound **b**

## IV. The General Synthetic Procedure and Data for Starting Materials.

### 1. Typical procedure for the preparation of tetrasulfide substrates **1**

Thiol (1.0 equiv.) and base (1.0 equiv.) were added to anhydrous solvent (30 mL) in an oven-dried round bottom flask under nitrogen. The solution was cooled to -78 °C for 1 hour, after which sulfur monochloride (0.6 equiv.) was added dropwise. The reaction was stirred for 2 hours and then quenched with saturated sodium bicarbonate solution (30 mL), and the aqueous layer was discarded. The organic layer was washed with deionized water (30 mL) and brine (30 mL). The organic layer was dried over sodium sulfate, the residue was purified by column chromatography on silica gel using PE or PE/EA and concentrated in vacuo to afford the required compounds. Compounds **1a**<sup>1</sup>, **1b**<sup>2</sup>, **1c**<sup>1</sup>, **1g**<sup>3</sup>, **1h**<sup>4</sup>, **1i**<sup>5</sup>, **1j**<sup>3</sup>, **1k**<sup>3</sup>, **1l**<sup>6</sup> and **1o**<sup>3</sup> have been reported previously.<sup>1</sup>

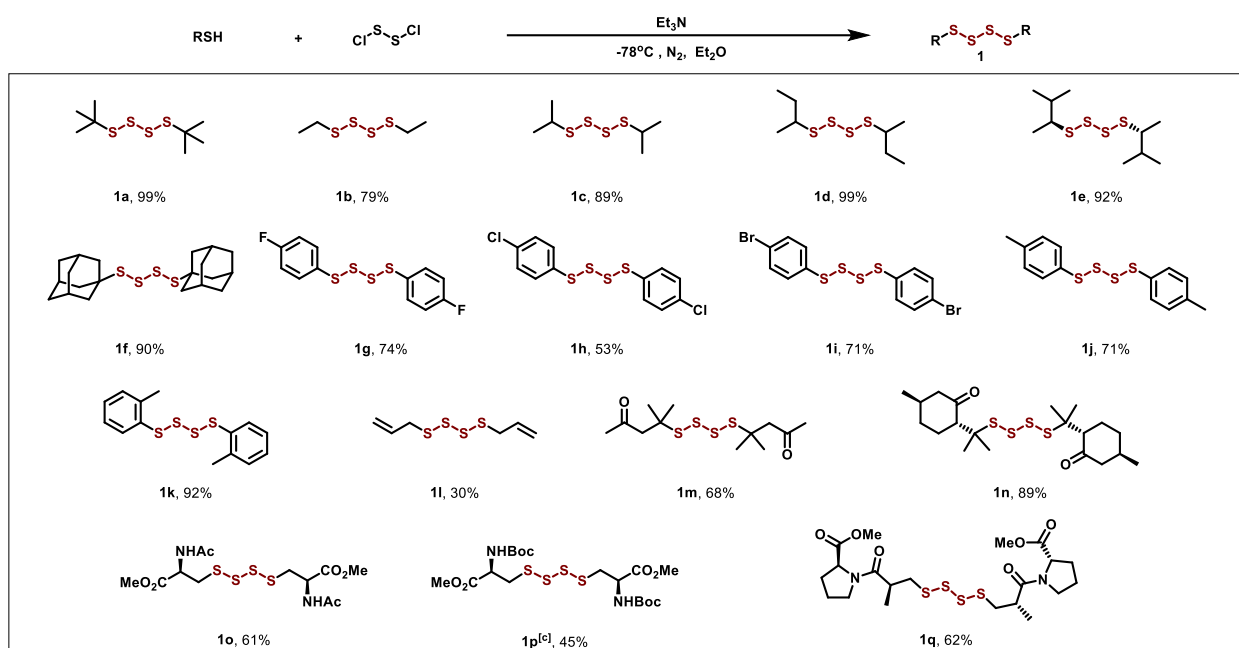

**Figure S8.** The synthesis of tetrasulfide substrates **1**. <sup>[a]</sup><sup>[b]</sup> <sup>[a]</sup>Reaction conditions: RSH (2 mmol), S<sub>2</sub>Cl<sub>2</sub> (1.2 mmol), Et<sub>3</sub>N (2 mmol), and Et<sub>2</sub>O (15 mL) were stirred at -78 °C under N<sub>2</sub> atmosphere for 1.5-6 h. <sup>[b]</sup>Isolated yield. <sup>[c]</sup>Pyridine (2 mmol), dichloromethane (15 mL).

## 2. Typical procedure for the preparation of sulfinic acids **2**

To a 50 mL flask, Na<sub>2</sub>SO<sub>3</sub> (3.8 g, 30.0 mmol) was dissolved in 20 mL pure water. Then aryl or alkyl sulfonyl chloride (10.0 mmol) was added into reaction system. The mixture was stirred at 75 °C for 5 h and returned to room temperature. This aqueous solution was washed with chloroform twice, acidified by dripping excess diluent H<sub>2</sub>SO<sub>4</sub> solution at 0 °C. The mixture was stirred and kept at 0 °C for 1 h, extracted with dichloromethane and concentrated in vacuo to afford the sulfinic acids in 40-70% yields.<sup>7</sup>

## V. Optimization of reaction conditions<sup>[a]</sup>

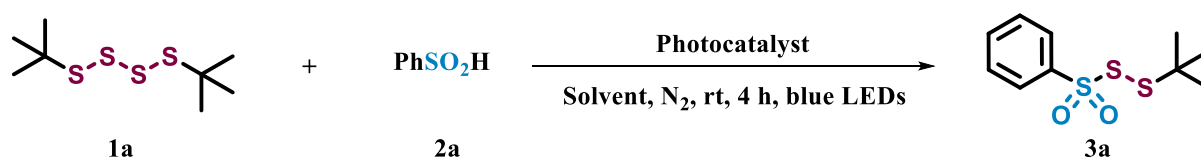

| Entry                   | Photocatalyst                                                         | Solvent   | Yield <sup>[b]</sup> (%) |
|-------------------------|-----------------------------------------------------------------------|-----------|--------------------------|
| 1                       | Eosin B                                                               | EA        | Trace                    |
| 2                       | UO <sub>2</sub> (NO <sub>3</sub> ) <sub>2</sub> ·6H <sub>2</sub> O    | EA        | Trace                    |
| 3                       | Methylene                                                             | EA        | NR                       |
| 4                       | Eosin Y                                                               | EA        | 56                       |
| 5                       | Ir(ppy) <sub>3</sub>                                                  | EA        | 41                       |
| 6                       | [Ir(dF(CF <sub>3</sub> )ppy) <sub>2</sub> (dtbbpy)]·PF <sub>6</sub>   | EA        | 80                       |
| 7                       | [Ir(dF(CF <sub>3</sub> )ppy) <sub>2</sub> (dtbbpy)]·PF <sub>6</sub>   | DCE       | 54                       |
| 8                       | [Ir(dF(CF <sub>3</sub> )ppy) <sub>2</sub> (dtbbpy)]·PF <sub>6</sub>   | THF       | 63                       |
| 9                       | [Ir(dF(CF <sub>3</sub> )ppy) <sub>2</sub> (dtbbpy)]·PF <sub>6</sub>   | DMF       | 40                       |
| 10                      | [Ir(dF(CF <sub>3</sub> )ppy) <sub>2</sub> (dtbbpy)]·PF <sub>6</sub>   | Acetone   | 55                       |
| 11                      | [Ir(dF(CF <sub>3</sub> )ppy) <sub>2</sub> (dtbbpy)]·PF <sub>6</sub>   | DCM       | 20                       |
| 12 <sup>[c]</sup>       | [Ir(dF(CF <sub>3</sub> )ppy) <sub>2</sub> (dtbbpy)]·PF <sub>6</sub>   | EA        | 73                       |
| <b>13<sup>[d]</sup></b> | <b>[Ir(dF(CF<sub>3</sub>)ppy)<sub>2</sub>(dtbbpy)]·PF<sub>6</sub></b> | <b>EA</b> | <b>90</b>                |
| 14                      | —                                                                     | EA        | NR                       |
| 15 <sup>[e]</sup>       | [Ir(dF(CF <sub>3</sub> )ppy) <sub>2</sub> (dtbbpy)]·PF <sub>6</sub>   | EA        | NR                       |
| 16 <sup>[f]</sup>       | [Ir(dF(CF <sub>3</sub> )ppy) <sub>2</sub> (dtbbpy)]·PF <sub>6</sub>   | EA        | 7                        |
| 17 <sup>[g]</sup>       | [Ir(dF(CF <sub>3</sub> )ppy) <sub>2</sub> (dtbbpy)]·PF <sub>6</sub>   | EA        | Messy                    |

**Figure S9.** <sup>[a]</sup>Reaction conditions: **1a** (0.1 mmol, 24.2 mg), **2a** (0.3 mmol, 42.6 mg), catalyst (1 mol%) and solvent (1 mL) were stirred at room temperature under N<sub>2</sub> atmosphere and blue LEDs (460 nm, 6 W) for 4 h. <sup>[b]</sup>Isolated yields. <sup>[c]</sup>**2a** (0.2 mmol, 28.4 mg). <sup>[d]</sup>**2a** (0.1 mmol, 14.2 mg). <sup>[e]</sup>Without blue LEDs. <sup>[f]</sup>**2a** (0.1 mmol, 14.2 mg), without blue LEDs but at 60 °C. <sup>[g]</sup>Under air.

## VI. General Procedures

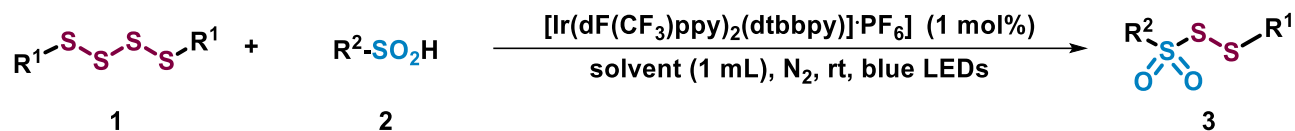

A mixture of tetrasulfide **1** (1 equivalent, 1 mmol), sulfinic acid **2** (1 equivalent, 1 mmol),  $[\text{Ir}(\text{dF}(\text{CF}_3)\text{ppy})_2(\text{dtbbpy})]\cdot\text{PF}_6$  (1 mol%, 1.1 mg) was added into a reaction tube. The tube was evacuated and inflated with  $\text{N}_2$  balloon for three times. Then 1 mL solvent was added and the mixture was stirred for 3-20 h under blue LEDs (460 nm, 5-8 W) in a paralleled reactor. After evaporation of solvent, the residue was purified by column chromatography on silica gel using PE/EA or hexane/EA and concentrated in vacuo to afford the required compound **3**. For detailed modification, please follow the corresponding procedures.

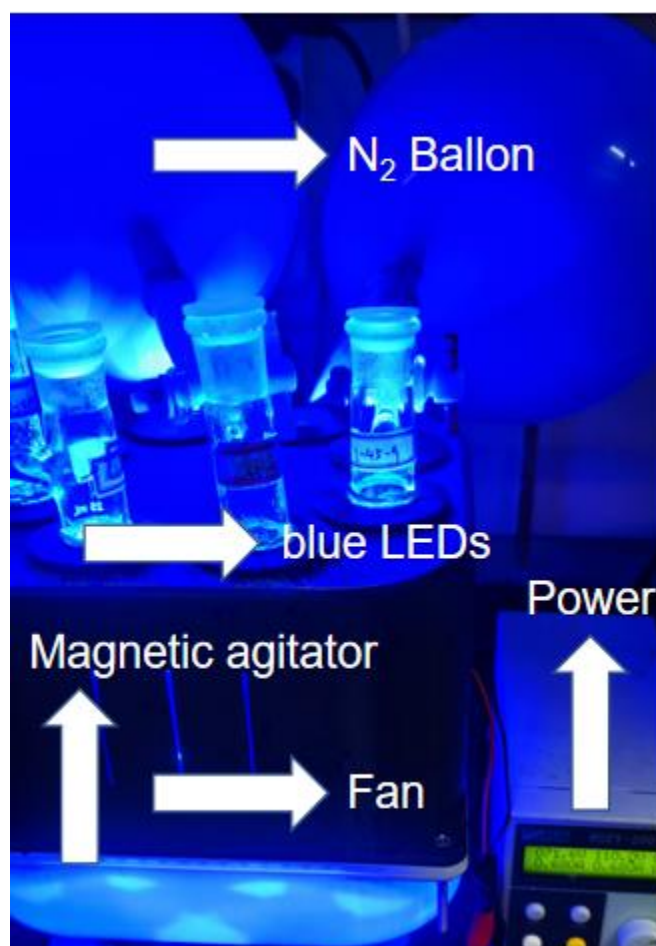

**Figure S10:** Parallel Photoreactor

<sup>[a]</sup>There are three LEDs in each cell. Two LEDs are on the opposite sides with the third one on the bottom part of the cell.

## VII. Procedures and Data

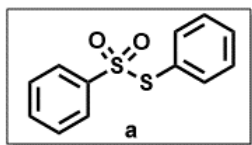

By-product: S-phenyl benzenesulfonylthioate **a**<sup>8</sup>. **<sup>1</sup>H NMR** (400 MHz, CDCl<sub>3</sub>)  $\delta$  7.59-7.54 (dd, J = 12.2, 4.8 Hz, 3H), 7.48-7.44 (m, J = 8.7, 4.3, 2.4 Hz, 1H), 7.36-7.38 (m, 1H), 7.36-7.30 (m, 1H). **<sup>13</sup>C NMR** (101 MHz, CDCl<sub>3</sub>)  $\delta$  142.9, 136.5, 133.5, 131.3, 129.3, 128.7, 127.7, 127.4.

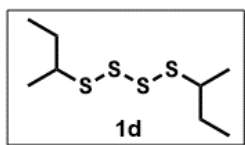

1,4-di-sec-butyltetrasulfane (**1d**, Yellow liquid, 99%). **<sup>1</sup>H NMR** (400 MHz, CDCl<sub>3</sub>)  $\delta$  3.08-2.94 (m, 1H), 1.80-1.57 (m, J = 28.3, 14.1, 6.9 Hz, 2H), 1.37-1.35 (d, J = 6.9 Hz, 3H), 0.99 (t, J = 7.4 Hz, 3H). **<sup>13</sup>C NMR** (101 MHz, CDCl<sub>3</sub>)  $\delta$  48.9, 29.0, 20.2, 11.4. **IR** (neat) 3173, 2963, 2920, 2872, 1449, 1373, 1219, 716, 1146, 789, 513 cm<sup>-1</sup>. **HRMS** (EI) Calcd for C<sub>8</sub>H<sub>18</sub>S<sub>4</sub> 242.0291, found 242.0290.

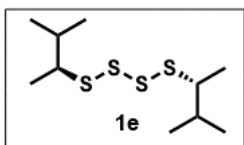

1,4-bis(3-methylbutan-2-yl) tetrasulfane (**1e**, Yellow liquid, 92%). **<sup>1</sup>H NMR** (400 MHz, CDCl<sub>3</sub>)  $\delta$  3.16-3.09 (m, 1H), 2.14-1.96 (m, 1H), 1.37-1.29 (m, 3H), 1.05-0.91 (m, 6H). **<sup>13</sup>C NMR** (126 MHz, CDCl<sub>3</sub>)  $\delta$  54.3 (d, J = 2.7 Hz), 32.0 (d, J = 1.2 Hz), 20.2, 18.1, 16.5. **IR** (neat) 2961, 2928, 2870, 1713, 1265, 741, 507 cm<sup>-1</sup>. **HRMS** (EI) Calcd for C<sub>10</sub>H<sub>22</sub>S<sub>4</sub> 270.0604, found 270.0602.

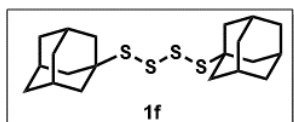

1,4-di((3S,5S,7S)-adamantan-1-yl) tetrasulfane (**1f**, White solid, 90%). **<sup>1</sup>H NMR** (300 MHz, CDCl<sub>3</sub>)  $\delta$  2.11 (s, 3H), 1.92 (s, 6H), 1.70 (s, 6H). **<sup>13</sup>C NMR** (101 MHz, CDCl<sub>3</sub>)  $\delta$  50.7, 42.8, 36.0, 29.9. **IR** (neat) 2901, 2920, 2847, 2673, 2654, 1451, 1341, 1296, 1040, 741, 513 cm<sup>-1</sup>. **HRMS** (EI) Calcd for C<sub>20</sub>H<sub>30</sub>S<sub>4</sub> 398.1230, found 398.1226.

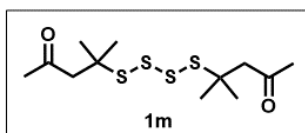

4,4'-tetrasulfanedibis(4-methylpentan-2-one) (**1m**, Yellow liquid, 68%) 5-methyl-5-((2-methyl-4-oxopentan-2-yl) tetrasulfanyl) hexan-2-one. **<sup>1</sup>H NMR** (400 MHz, CDCl<sub>3</sub>) δ 2.76-2.66(m, 2H), 2.07-2.01 (dd, *J* = 16.1, 11.1 Hz, 3H), 1.36 (m, *J* = 22.4, 15.8, 9.1 Hz, 6H). **<sup>13</sup>C NMR** (101 MHz, CDCl<sub>3</sub>) δ 205.3, 53.2, 50.0, 31.7, 27.1. **IR** (neat) 3173, 2967, 2924, 2361, 1709, 1462, 1377, 1358, 1333, 1113, 943, 546 cm<sup>-1</sup>. **HRMS** (EI) Calcd for C<sub>12</sub>H<sub>22</sub>O<sub>2</sub>S<sub>4</sub> 326.0503, found 326.0498.

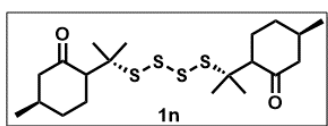

6,6'-(tetrasulfanedibis(propane-2,2-diyl)) bis(3-methylcyclohexan-1-one) (**1n**, Yellow liquid, 89%). **<sup>1</sup>H NMR** (400 MHz, CDCl<sub>3</sub>) δ 2.74-2.70 (m, 1H), 2.45-2.42 (m, 2H), 2.26-2.25 (m, *J* = 12.1, 3.7, 2.2 Hz, 3H), 2.11-1.84 (m, 3H), 1.94-1.82 (m, 2H), 1.53 (s, 3H), 1.37 (d, *J* = 6.8 Hz, 3H), 0.98 (d, *J* = 6.2 Hz, 2H), 0.90 (d, *J* = 7.1 Hz, 1H). **<sup>13</sup>C NMR** (101 MHz, CDCl<sub>3</sub>) δ 210.5, 56.7, 54.1, 52.3, 36.7, 34.1, 29.7, 27.0, 23.1, 22.2. **IR** (neat) 2959, 2926, 2868, 1709, 1454, 1360, 1119, 733, 548 cm<sup>-1</sup>. **HRMS** (EI) Calcd for C<sub>20</sub>H<sub>34</sub>O<sub>2</sub>S<sub>4</sub> 434.1442, found 434.1438.

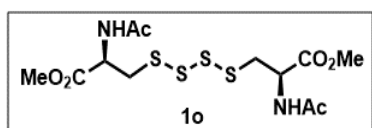

Dimethyl 3,3'-tetrasulfanedibis(2R,2'R)-bis(2-acetamidopropanoate) (**1o**<sup>3</sup>, Yellow solid, 61%). **<sup>1</sup>H NMR** (400 MHz, CDCl<sub>3</sub>) δ 5.04-4.99 (m, 1H), 3.76 (s, 3H), 3.60-3.46 (m, *J* = 34.0, 11.2, 9.4 Hz, 2H), 2.23-2.22 (d, *J* = 1.7 Hz, 3H). **<sup>13</sup>C NMR** (101 MHz, CDCl<sub>3</sub>) δ 171.1, 170.0, 77.9, 52.5, 36.0, 20.1. **IR** (neat) 3410, 2953, 2361, 1736, 1626, 1229, 1202, 1157, 621, 604, 592 cm<sup>-1</sup>.

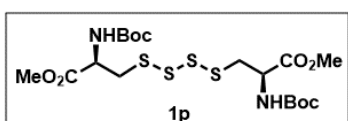



Dimethyl 3,3'-tetrasulfanediyl(2R,2'R)-bis(2-((tert-butoxycarbonyl) amino) propanoate) (**1p**, White powder, 45%). **<sup>1</sup>H NMR** (400 MHz, CDCl<sub>3</sub>) δ 5.41 (d, *J* = 6.5 Hz, 1H), 4.67 (d, *J* = 5.0 Hz, 1H), 3.78 (s, 4H), 3.44 (m, *J* = 19.5, 14.0, 5.0 Hz, 3H), 1.45 (s, 13H). **<sup>13</sup>C NMR** (101 MHz, CDCl<sub>3</sub>) δ 170.8, 154.9, 99.9, 80.3, 52.9, 52.7, 41.4, 28.3. **IR (neat)** 3431, 3420, 3055, 2984, 2957, 1746, 1713, 1499, 1265, 1163, 735, 704 cm<sup>-1</sup>. **HRMS** (EI) Calcd for C<sub>18</sub>H<sub>32</sub>N<sub>2</sub>O<sub>8</sub>S<sub>4</sub> 532.1042, found 532.1028.

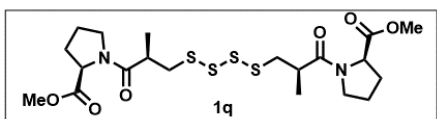

Dimethyl ((2S,2'S)-3,3'-tetrasulfanediylbis(2-methylpropanoyl)) (S)-di-L-prolinate (**1q**, White power, 62%). **<sup>1</sup>H NMR** (400 MHz, CDCl<sub>3</sub>) δ 4.52-4.48 (dt, *J* = 8.8, 4.4 Hz, 1H), 3.72-3.72 (d, *J* = 1.8 Hz, 3H), 3.69-3.67 (d, *J* = 6.3 Hz, 1H), 3.24-3.16 (m, *J* = 11.3, 9.9, 6.7 Hz, 1H), 3.06-3.00 (dt, *J* = 12.5, 5.5 Hz, 1H), 2.87-2.82 (dd, *J* = 12.8, 4.9 Hz, 1H), 2.63-2.58 (dt, *J* = 9.7, 3.9 Hz, 1H), 2.21 (m, *J* = 10.6, 6.8, 3.8 Hz, 1H), 2.01 (dd, *J* = 11.1, 5.1 Hz, 3H), 1.23 (m, *J* = 15.0, 10.7, 6.7 Hz, 3H). **<sup>13</sup>C NMR** (101 MHz, CDCl<sub>3</sub>) δ 173.37 (d, *J* = 31.1 Hz), 172.7, 58.67 (d, *J* = 3.9 Hz), 52.1, 46.9 (d, *J* = 3.4 Hz), 41.4 (d, *J* = 45.6 Hz), 29.0, 24.8 (d, *J* = 3.7 Hz), 16.8 (d, *J* = 8.0 Hz). **IR (neat)** 2972, 2878, 2361, 2243, 1742, 1639, 1431, 1196, 1173, 914, 727 cm<sup>-1</sup>. **HRMS** (DART) *m/z* calcd. for C<sub>20</sub>H<sub>33</sub>N<sub>2</sub>O<sub>6</sub>S<sub>4</sub> [M+H]<sup>+</sup>: Calcd 525.1221, found 525.1207.

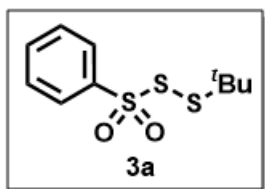

A mixture of 1,4-di-tert-butyltetrasulfane (1 equivalent, 1 mmol, 24.2 mg), benzenesulfinic acid (1 equivalent, 1 mmol, 14.2 mg), [Ir(dF(CF<sub>3</sub>)ppy)<sub>2</sub>(dtbbpy)]·PF<sub>6</sub> (1 mol%, 1.1 mg) were added into a reaction tube. The tube was evacuated and inflated with N<sub>2</sub> balloon for three times. Then 1 mL ethyl acetate was added and the mixture was stirred for 5 h under blue LEDs (460 nm, 6 W) in a paralleled reactor. **3a**<sup>9</sup> (23.6 mg, 90%) was obtained through column chromatography (V<sub>PE</sub>/V<sub>EA</sub> = 60/1) as a colorless liquid. **<sup>1</sup>H NMR** (400 MHz, CDCl<sub>3</sub>) δ 7.94-7.92 (dd, *J* = 5.3, 3.3 Hz, 2H), 7.67-7.53 (m, *J* = 33.9, 15.2, 4.2 Hz, 3H), 1.38 (s, 9H). **<sup>13</sup>C NMR** (101 MHz, CDCl<sub>3</sub>) δ 143.1, 133.9, 129.1, 127.8, 50.3, 30.2.

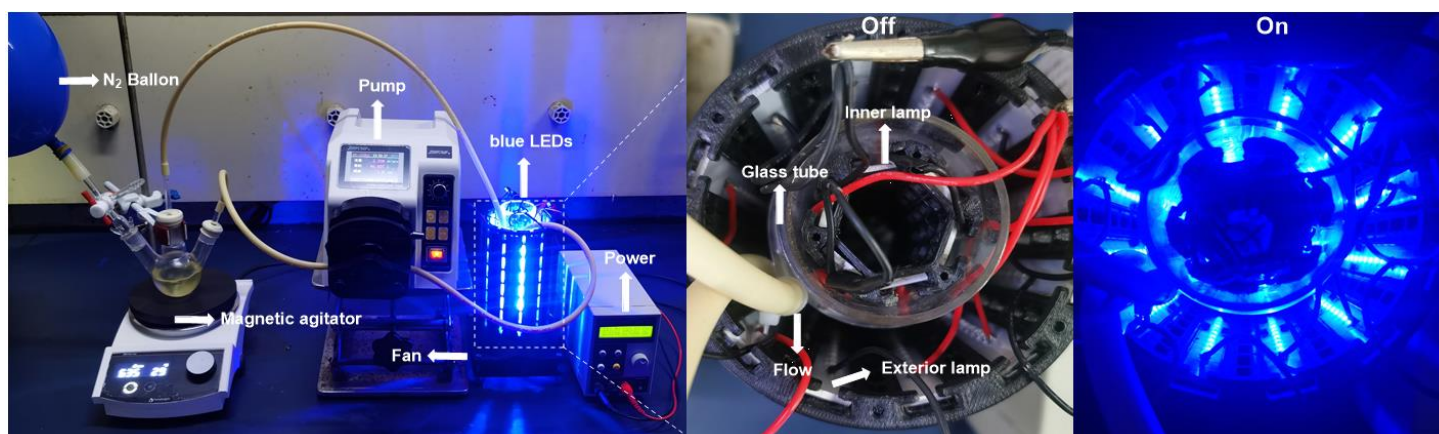

**Figure S11.** Flow Reaction Photoreactor.

**Flow reaction:** A mixture of 1,4-di-tert-butyltetrasulfane (1 equivalent, 6 mmol, 1.45 g), benzenesulfinic acid (1 equivalent, 6 mmol, 0.85 g),  $[\text{Ir}(\text{dF}(\text{CF}_3)\text{ppy})_2(\text{dtbbpy})]\cdot\text{PF}_6$  (1 mol%, 60 mg) was added into a 250 mL three-necked flask. The flask along with the micro cube were evacuated and filled with  $\text{N}_2$  three times at room temperature. Then ethyl acetate (60 mL) was added and the mixture was stirred for 6.5 h under blue LEDs (430 nm, 85 W totally) in a paralleled reactor. The flask was equipped with rubber plugs, with inlet and outlet of micro tube, which was made of glass tubing (O.D. = 5 mm, I.D. = 2 mm, length = 2.42 m, volume = 39.9 mL). The solution was pumped by a pump (0.5 mL/min) into the micro tube, then returned to flask. This circulatory system was irradiated by blue LEDs. After the reaction, ethyl acetate (10 mL) was pumped into the tube to flush out residual fluid. After evaporation of solvent, the residue was purified by column chromatography on silica gel (PE/EA= 60:1) and concentrated in vacuo to afford the required compound **3a** (76%, 1.196 g).

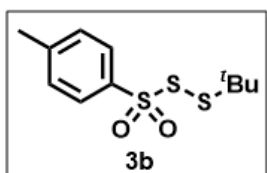

A mixture of 1,4-di-tert-butyltetrasulfane (1 equivalent, 1 mmol, 24.2 mg), 4-methyl-benzenesulfinic acid (3 equivalent, 3 mmol, 46.8 mg),  $[\text{Ir}(\text{dF}(\text{CF}_3)\text{ppy})_2(\text{dtbbpy})]\cdot\text{PF}_6$  (1 mol%, 1.1 mg) were added into a reaction tube. The tube was evacuated and inflated with  $\text{N}_2$  balloon for three times. Then 1 mL ethyl acetate was added and the mixture was stirred for 4 h under blue LEDs

(460 nm, 5 W) in a paralleled reactor. **3b** (52.0 mg, 93%) was obtained through column chromatography ( $V_{PE}/V_{EA} = 50/1$ ) as a colorless liquid. **<sup>1</sup>H NMR** (300 MHz,  $CDCl_3$ )  $\delta$  7.82-7.79 (d,  $J = 8.1$  Hz, 2H), 7.36-7.33 (d,  $J = 8.0$  Hz, 2H), 2.45 (s, 3H), 1.37 (s, 9H). **<sup>13</sup>C NMR** (101 MHz,  $CDCl_3$ )  $\delta$  145.0, 140.2, 129.6, 127.9, 50.2, 30.2, 21.6. **IR** (neat) 3051, 2963, 2857, 1591, 1469, 1460, 1366, 1329, 1125, 1329, 1125, 812, 652  $cm^{-1}$ . **HRMS** (EI) Calcd for  $C_{11}H_{16}O_2S_3$  276.0312, found 276.0316.

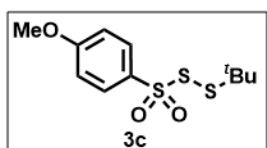

A mixture of 1,4-di-tert-butyltetrasulfane (1 equivalent, 1 mmol, 24.2 mg), 4-methoxybenzenesulfinic acid (1 equivalent, 1 mmol, 10.2 mg),  $[Ir(dF(CF_3)ppy)_2(dtbbpy)] \cdot PF_6$  (1 mol%, 1.1 mg) were added into a reaction tube. The tube was evacuated and inflated with  $N_2$  balloon for three times. Then 1 mL ethyl acetate was added and the mixture was stirred for 4 h under blue LEDs (460 nm, 8 W) in a paralleled reactor. **3c** (26.3 mg, 90%) was obtained through column chromatography ( $V_{PE}/V_{EA} = 60/1$ ) as a colorless liquid. **<sup>1</sup>H NMR** (300 MHz,  $CDCl_3$ )  $\delta$  7.87-7.84 (d,  $J = 9.0$  Hz, 2H), 7.01-6.98 (d,  $J = 9.0$  Hz, 2H), 3.89 (s, 3H), 1.37 (s, 9H). **<sup>13</sup>C NMR** (101 MHz,  $CDCl_3$ )  $\delta$  163.9, 134.7, 130.2, 114.1, 55.7, 50.2, 30.2. **IR** (neat) 3051, 2965, 2940, 2922, 2898, 1591, 1495, 1327, 1261, 1134, 1159, 1076, 1022, 656, 575, 529  $cm^{-1}$ . **HRMS** (EI) Calcd for  $C_{11}H_{16}O_3S_3$  292.0262, found 292.0258.

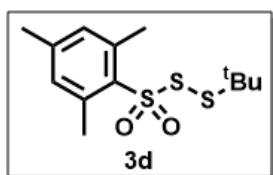

A mixture of 1,4-di-tert-butyltetrasulfane (1 equivalent, 1 mmol, 24.2 mg), 2,4,6-trimethylbenzenesulfinic acid (1 equivalent, 1 mmol, 18.4 mg),  $[Ir(dF(CF_3)ppy)_2(dtbbpy)] \cdot PF_6$  (1 mol%, 1.1 mg) were added into a reaction tube. The tube was evacuated and inflated with  $N_2$  balloon for three times. Then 1 mL ethyl acetate was added and the mixture was stirred for 4 h under blue LEDs (460 nm, 8 W) in a paralleled reactor. **3d** (19.6 mg, 64%) was obtained through column chromatography ( $V_{PE}/V_{EA} = 20/1$ ) as a colorless liquid. **<sup>1</sup>H NMR** (300 MHz,  $CDCl_3$ )  $\delta$  7.26-6.96 (d, 2H), 2.73 (s, 6H), 2.31 (s, 3H), 1.34 (s, 9H). **<sup>13</sup>C NMR** (101 MHz,  $CDCl_3$ )  $\delta$  143.8,

139.9, 138.2, 132.0, 50.1, 30.2, 23.3, 21.0. **IR** (neat) 3011, 2967, 2850, 2743, 1751, 1456, 1366, 1323, 1140, 716, 640, 586, 509  $\text{cm}^{-1}$ . **HRMS** (EI) Calcd for  $\text{C}_{13}\text{H}_{20}\text{O}_2\text{S}_3$  304.0625, found 304.0631.

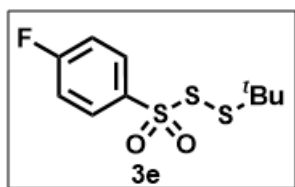

A mixture of 1,4-di-tert-butyltetrasulfane (1 equivalent, 1 mmol, 24.2 mg), 4-fluorobenzenesulfinic acid (1 equivalent, 1 mmol, 16.0 mg),  $[\text{Ir}(\text{dF}(\text{CF}_3)\text{ppy})_2(\text{dtbbpy})]\cdot\text{PF}_6$  (1 mol%, 1.1 mg) were added into a reaction tube. The tube was evacuated and inflated with  $\text{N}_2$  balloon for three times. Then 1 mL ethyl acetate was added and the mixture was stirred for 4 h under blue LEDs (460 nm, 8 W) in a paralleled reactor. **3e** (21.0 mg, 75%) was obtained through column chromatography ( $V_{\text{PE}}/V_{\text{EA}} = 60/1$ ) as a colorless liquid.  **$^1\text{H}$  NMR** (300 MHz,  $\text{CDCl}_3$ )  $\delta$  7.97-7.92 (m, 2H), 7.23-7.20 (d, 2H), 1.39 (s, 9H).  **$^{13}\text{C}$  NMR** (101 MHz,  $\text{CDCl}_3$ )  $\delta$  165.8-164.5 (d,  $J = 257.2$  Hz), 139.0-139.0 (d,  $J = 3.2$  Hz), 130.8-130.7 (d,  $J = 9.7$  Hz), 116.5-116.3 (d,  $J = 22.8$  Hz), 50.5, 30.2.  **$^{19}\text{F}$  NMR** (376 MHz,  $\text{CDCl}_3$ )  $\delta$  -102.57 (s). **IR** (neat) 3048, 2965, 1466, 1366, 1327, 1144, 1366, 799, 750, 716, 687, 592, 538  $\text{cm}^{-1}$ . **HRMS** (EI) Calcd for  $\text{C}_{10}\text{H}_{13}\text{FO}_2\text{S}_3$  280.0062, found 280.0060.

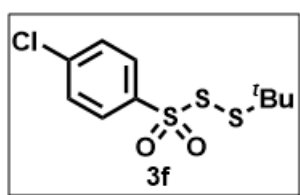

A mixture of 1,4-di-tert-butyltetrasulfane (1 equivalent, 1 mmol, 24.2 mg), 4-chlorobenzenesulfinic acid (1 equivalent, 1 mmol, 17.7 mg),  $[\text{Ir}(\text{dF}(\text{CF}_3)\text{ppy})_2(\text{dtbbpy})]\cdot\text{PF}_6$  (1 mol%, 1.1 mg) were added into a reaction tube. The tube was evacuated and inflated with  $\text{N}_2$  balloon for three times. Then 1 mL ethyl acetate was added and the mixture was stirred for 4 h under blue LEDs (460 nm, 8 W) in a paralleled reactor. **3f** (24.0 mg, 81%) was obtained through column chromatography ( $V_{\text{PE}}/V_{\text{EA}} = 60/1$ ) as a colorless liquid.  **$^1\text{H}$  NMR** (300 MHz,  $\text{CDCl}_3$ )  $\delta$  7.89-7.83 (m, 2H), 7.55-7.51 (m, 2H), 1.39 (s, 9H).  **$^{13}\text{C}$  NMR** (101 MHz,  $\text{CDCl}_3$ )  $\delta$  141.4, 140.6, 129.4,

129.2, 50.5, 30.2. **IR** (neat) 3051, 2965, 2359, 1753, 1611, 1470, 1327, 1446, 1092, 602, 592, 822  $\text{cm}^{-1}$ . **HRMS** (EI) Calcd for  $\text{C}_{10}\text{H}_{13}\text{O}_2\text{S}_3$  295.9766, found 295.9763.

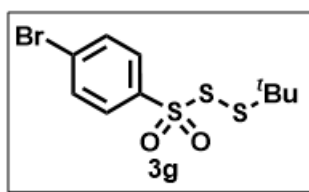

A mixture of 1,4-di-tert-butyltetrasulfane (1 equivalent, 1 mmol, 24.2 mg), 4-bromobenzenesulfinic acid (1 equivalent, 1 mmol, 22.1 mg),  $[\text{Ir}(\text{dF}(\text{CF}_3)\text{ppy})_2(\text{dtbbpy})]\cdot\text{PF}_6$  (1 mol%, 1.1 mg) were added into a reaction tube. The tube was evacuated and inflated with  $\text{N}_2$  balloon for three times. Then 1 mL ethyl acetate was added and the mixture was stirred for 4 h under blue LEDs (460 nm, 8 W) in a paralleled reactor. **3g** (28.4 mg, 83%) was obtained through column chromatography ( $V_{\text{PE}}/V_{\text{EA}} = 20/1$ ) as a colorless liquid.  **$^1\text{H}$  NMR** (300 MHz,  $\text{CDCl}_3$ )  $\delta$  7.79-7.75 (m, 2H), 7.70-7.67 (d,  $J = 8.8$  Hz, 2H), 1.38 (s, 9H).  **$^{13}\text{C}$  NMR** (101 MHz,  $\text{CDCl}_3$ )  $\delta$  141.9, 141.5, 132.4, 129.2, 50.5, 30.2. **IR** (neat) 3090, 2963, 1470, 1456, 1389, 1366, 1329, 1140, 1074, 737, 594, 550  $\text{cm}^{-1}$ . **HRMS** (EI) Calcd for  $\text{C}_{10}\text{H}_{13}\text{BrO}_2\text{S}_3$  339.9261, found 339.9260.

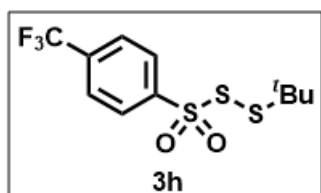

A mixture of 1,4-di-tert-butyltetrasulfane (1 equivalent, 1 mmol, 24.2 mg), 4-(trifluoromethyl)benzenesulfinic acid (1 equivalent, 1 mmol, 21.0 mg),  $[\text{Ir}(\text{dF}(\text{CF}_3)\text{ppy})_2(\text{dtbbpy})]\cdot\text{PF}_6$  (1 mol%, 1.1 mg) were added into a reaction tube. The tube was evacuated and inflated with  $\text{N}_2$  balloon for three times. Then 1 mL ethyl acetate was added and the mixture was stirred for 4 h under blue LEDs (460 nm, 8 W) in a paralleled reactor. **3h** (21.5 mg, 67%) was obtained through column chromatography ( $V_{\text{PE}}/V_{\text{EA}} = 60/1$ ) as a colorless liquid.  **$^1\text{H}$  NMR** (400 MHz,  $\text{CDCl}_3$ )  $\delta$  8.06-8.04 (d,  $J = 8.2$  Hz, 2H), 7.84-7.81 (d,  $J = 8.4$  Hz, 2H), 1.40 (s, 9H).  **$^{13}\text{C}$  NMR** (101 MHz,  $\text{CDCl}_3$ )  $\delta$  146.3, 135.9-134.9 (q,  $J = 33.2$  Hz), 128.8, 128.3, 127.1, 126.5-126.4 (d,  $J = 3.7$  Hz), 126.5-126.3 (q,  $J = 3.7$  Hz), 124.4, 121.6, 118.9, 50.7, 30.2.  **$^{19}\text{F}$  NMR** (376 MHz,  $\text{CDCl}_3$ )  $\delta$  -63.20 (s). **IR** (neat)

3031, 2968, 2930, 2864, 1461, 1404, 1368, 1323, 1146, 1061, 710, 610, 588  $\text{cm}^{-1}$ . **HRMS** (EI) Calcd for  $\text{C}_{11}\text{H}_{13}\text{F}_3\text{O}_2\text{S}_3$  330.0030, found 330.0028.

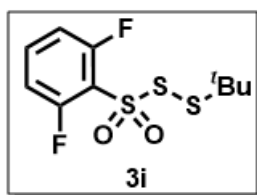

A mixture of 1,4-di-tert-butyltetrasulfane (1 equivalent, 1 mmol, 24.2 mg), 2,6-difluorobenzenesulfinic acid (1 equivalent, 1 mmol, 17.8 mg),  $[\text{Ir}(\text{dF}(\text{CF}_3)\text{ppy})_2(\text{dtbbpy})]\cdot\text{PF}_6$  (1 mol%, 1.1 mg) were added into a reaction tube. The tube was evacuated and inflated with  $\text{N}_2$  balloon for three times. Then 1 mL ethyl acetate was added and the mixture was stirred for 4 h under blue LEDs (460 nm, 6 W) in a paralleled reactor. **3i** (19.1 mg, 60%) was obtained through column chromatography ( $V_{\text{Hexane}}/V_{\text{EA}} = 20/1$ ) as a colorless liquid.  **$^1\text{H}$  NMR** (400 MHz,  $\text{CDCl}_3$ )  $\delta$  7.62-7.55 (m, 1H), 7.07-7.03 (dd,  $J = 9.6, 7.1$  Hz, 2H), 1.39 (s, 9H).  **$^{13}\text{C}$  NMR** (101 MHz,  $\text{CDCl}_3$ )  $\delta$  160.9-169.8 (d,  $J = 3.3$  Hz), 136.1-135.9 (t,  $J = 11.0$  Hz), 120.9-120.6 (t,  $J = 15.6$  Hz), 113.3-113.1 (dd,  $J = 23.2, 3.4$  Hz), 50.8, 30.1.  **$^{19}\text{F}$  NMR** (376 MHz,  $\text{CDCl}_3$ )  $\delta$  -104.85 (s). **IR** (neat) 3096, 2963, 2924, 1609, 1585, 1468, 1346, 1148, 1005, 791, 621, 577, 511  $\text{cm}^{-1}$ . **HRMS** (EI) Calcd for  $\text{C}_{10}\text{H}_{12}\text{F}_2\text{O}_2\text{S}_3$  297.9968, found 297.9971.

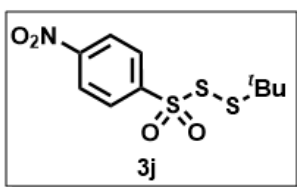

A mixture of 1,4-di-tert-butyltetrasulfane (1 equivalent, 1 mmol, 24.2 mg), 4-nitrobenzenesulfinic acid (1 equivalent, 1 mmol, 18.7 mg), [Ir(dF(CF<sub>3</sub>)ppy)<sub>2</sub>(dtbbpy)]·PF<sub>6</sub>] (1 mol%, 1.1 mg) were added into a reaction tube. The tube was evacuated and inflated with N<sub>2</sub> balloon for three times. Then 1 mL ethyl acetate was added and the mixture was stirred for 4 h under blue LEDs (460 nm, 5 W) in a paralleled reactor. **3j** (14.0 mg, 46%) was obtained through column chromatography (V<sub>PE</sub>/V<sub>EA</sub> = 50/1) as a yellow solid. **<sup>1</sup>H NMR** (400 MHz, CDCl<sub>3</sub>) δ 8.41-8.39 (d, *J* = 8.9 Hz, 2H), 8.12-8.10 (d, *J* = 8.9 Hz, 2H), 1.42 (s, 9H). **<sup>13</sup>C NMR** (101 MHz, CDCl<sub>3</sub>) δ 150.6, 148.0, 129.0, 124.4, 51.0, 30.2. **IR** (neat) 3103, 2965, 2924, 2864, 1529, 1346, 1312, 1140, 1074, 853, 745, 733, 681, 596, 554 cm<sup>-1</sup>. **HRMS** (EI) Calcd for C<sub>10</sub>H<sub>13</sub>NO<sub>4</sub>S<sub>3</sub> 307.0007, found 307.0005.

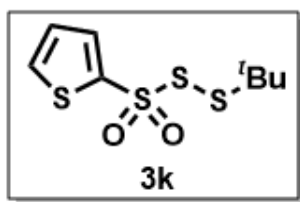

A mixture of 1,4-di-tert-butyltetrasulfane (1 equivalent, 1 mmol, 24.2 mg), thiophene-2-sulfinic acid (1 equivalent, 1 mmol, 14.9 mg), [Ir(dF(CF<sub>3</sub>)ppy)<sub>2</sub>(dtbbpy)]·PF<sub>6</sub>] (1 mol%, 1.1 mg) were added into a reaction tube. The tube was evacuated and inflated with N<sub>2</sub> balloon for three times. Then 1 mL ethyl acetate was added and the mixture was stirred for 4 h under blue LEDs (460 nm, 5 W) in a paralleled reactor. **3k** (13.4 mg, 50%) was obtained through column chromatography (V<sub>PE</sub>/V<sub>EA</sub> = 20/1) as a colorless liquid. **<sup>1</sup>H NMR** (300 MHz, CDCl<sub>3</sub>) δ 7.73-7.71 (m, 2H), 7.26-7.13(m, 1H), 1.40 (s, 9H). **<sup>13</sup>C NMR** (101 MHz, CDCl<sub>3</sub>) δ 143.2, 134.3, 134.2, 127.4, 50.6, 30.2. **IR** (neat) 3102, 2963, 2938, 2922, 2897, 1503, 1472, 1396, 1327, 1134, 1009, 721, 664, 554 cm<sup>-1</sup>. **HRMS** (EI) Calcd for C<sub>8</sub>H<sub>12</sub>O<sub>2</sub>S<sub>4</sub> 267.9720, found 267.9723.

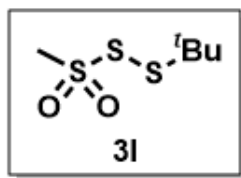

A mixture of 1,4-di-tert-butyltetrasulfane (1 equivalent, 1 mmol, 24.2 mg), sodium methanesulfinate (1 equivalent, 1 mmol, 10.2 mg), [Ir(dF(CF<sub>3</sub>)ppy)<sub>2</sub>(dtbbpy)]·PF<sub>6</sub>] (1 mol%, 1.1 mg) were added into a reaction tube. The tube was evacuated and inflated with N<sub>2</sub> balloon for three times. Then 1 mL ethyl acetate was added and the mixture was stirred for 4 h under blue LEDs (460 nm, 8 W) in a paralleled reactor. **3l** (13.4 mg, 67%) was obtained through column chromatography (V<sub>PE</sub>/V<sub>EA</sub> = 60/1) as a colorless liquid. **<sup>1</sup>H NMR** (400 MHz, CDCl<sub>3</sub>) δ 3.29 (s, 3H), 1.43 (s, 9H). **<sup>13</sup>C NMR** (101 MHz, CDCl<sub>3</sub>) δ 50.5, 47.1, 30.1. **IR** (neat) 2963, 2928, 2853, 2361, 1366, 1327, 1146, 1078, 716, 604, 592 cm<sup>-1</sup>. **HRMS** (EI) calcd for C<sub>5</sub>H<sub>12</sub>O<sub>2</sub>S<sub>3</sub> 199.9999, found 199.9997.

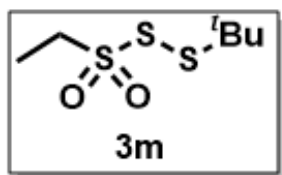

A mixture of 1,4-di-tert-butyltetrasulfane (1 equivalent, 1 mmol, 24.2 mg), sodium ethanesulfinate (1 equivalent, 1 mmol, 11.6 mg), [Ir(dF(CF<sub>3</sub>)ppy)<sub>2</sub>(dtbbpy)]·PF<sub>6</sub>] (1 mol%, 1.1 mg) were added into a reaction tube. The tube was evacuated and inflated with N<sub>2</sub> balloon for three times. Then 1 mL ethyl acetate was added and the mixture was stirred for 4 h under blue LEDs (460 nm, 8 W) in a paralleled reactor. **3m** (19.3 mg, 90%) was obtained through column chromatography (V<sub>PE</sub>/V<sub>EA</sub> = 60/1) as a yellow oily liquid. **<sup>1</sup>H NMR** (400 MHz, CDCl<sub>3</sub>) δ 3.41-3.35 (q, *J* = 7.4 Hz, 3H), 1.48-1.44 (dt, *J* = 10.0, 3.2 Hz, 2H), 1.42 (s, *J* = 3.5 Hz, 9H). **<sup>13</sup>C NMR** (101 MHz, CDCl<sub>3</sub>) δ 54.1, 50.2, 30.0, 8.2. **IR** (neat) 2965, 2940, 2924, 1472, 1456, 1366, 1323, 1126, 700 cm<sup>-1</sup>. **HRMS** (EI) Calcd for C<sub>6</sub>H<sub>14</sub>O<sub>2</sub>S<sub>3</sub> 214.0156, found 214.0152.



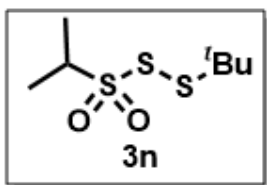

A mixture of 1,4-di-tert-butyltetrasulfane (1 equivalent, 1 mmol, 24.2 mg), propane-2-sulfinic acid (1 equivalent, 1 mmol, 10.8 mg), [Ir(dF(CF<sub>3</sub>)ppy)<sub>2</sub>(dtbbpy)]·PF<sub>6</sub>] (1 mol%, 1.1 mg) were added into a reaction tube. The tube was evacuated and inflated with N<sub>2</sub> balloon for three times. Then 1 mL ethyl acetate was added and the mixture was stirred for 4 h under blue LEDs (460 nm, 6 W) in a paralleled reactor. **3n** (20.6 mg, 90%) was obtained through column chromatography (V<sub>PE</sub>/V<sub>EA</sub> = 60/1) as a colorless liquid. **<sup>1</sup>H NMR** (400 MHz, CDCl<sub>3</sub>) δ 3.58-3.51 (dt, *J* = 13.7, 6.8 Hz, 1H), 1.47 (s, 3H), 1.45 (s, 3H), 1.41 (s, 9H). **<sup>13</sup>C NMR** (101 MHz, CDCl<sub>3</sub>) δ 61.9, 50.1, 29.9, 16.5. **IR** (neat) 2968, 2938, 1468, 1458, 1368, 1323, 1256, 1161, 1144, 1126, 716, 664, 588 cm<sup>-1</sup>. **HRMS** (EI) Calcd for C<sub>7</sub>H<sub>16</sub>O<sub>2</sub>S<sub>3</sub> 228.0312, found 228.0313.

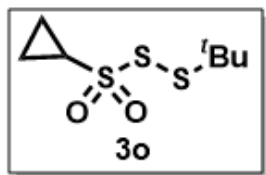

A mixture of 1,4-di-tert-butyltetrasulfane (1 equivalent, 1 mmol, 24.2 mg), cyclopropanesulfinic acid (1 equivalent, 1 mmol, 17.0 mg), [Ir(dF(CF<sub>3</sub>)ppy)<sub>2</sub>(dtbbpy)]·PF<sub>6</sub>] (1 mol%, 1.1 mg) were added into a reaction tube. The tube was evacuated and inflated with N<sub>2</sub> balloon for three times. Then 1 mL ethyl acetate was added and the mixture was stirred for 4 h under blue LEDs (460 nm, 5 W) in a paralleled reactor. **3o** (25.6 mg, 88%) was obtained through column chromatography (V<sub>PE</sub>/V<sub>EA</sub> = 50/1) as a colorless liquid. **<sup>1</sup>H NMR** (400 MHz, CDCl<sub>3</sub>) δ 2.97-2.91 (tt, *J* = 7.9, 4.7 Hz, 1H), 1.42 (s, 9H), 1.41-1.40 (dd, *J* = 4.9, 2.0 Hz, 2H), 1.16-1.10 (qd, *J* = 6.2, 1.3 Hz, 2H). **<sup>13</sup>C NMR** (101 MHz, CDCl<sub>3</sub>) δ 50.1, 38.1, 30.0, 6.8. **IR** (neat) 3021, 2965, 2940, 2922, 2867, 2864, 1456, 1323, 1226, 876, 683, 583 cm<sup>-1</sup>. **HRMS** (EI) Calcd for C<sub>7</sub>H<sub>14</sub>O<sub>2</sub>S<sub>3</sub> 226.0156, found 226.0156.

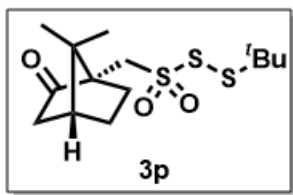

A mixture of 1,4-di-tert-butyltetrasulfane (1 equivalent, 1 mmol, 24.2 mg), ((1S,4R)-7,7-dimethyl-2-oxobicyclo [2.2.1] heptan-1-yl) methanesulfinic acid (1 equivalent, 1 mmol, 21.7 mg),  $[\text{Ir}(\text{dF}(\text{CF}_3)\text{ppy})_2(\text{dtbbpy})]\cdot\text{PF}_6$  (1 mol%, 1.1 mg) were added into a reaction tube. The tube was evacuated and inflated with  $\text{N}_2$  balloon for three times. Then 1 mL ethyl acetate was added and the mixture was stirred for 5 h under blue LEDs (460 nm, 8 W) in a paralleled reactor. **3p** (21.2 mg, 63%) was obtained through column chromatography ( $V_{\text{PE}}/V_{\text{EA}} = 20/1$ ) as a colorless liquid.  $^1\text{H NMR}$  (400 MHz,  $\text{CDCl}_3$ )  $\delta$  3.95-3.92 (d,  $J = 14.6$  Hz, 1H), 3.32-3.28 (d,  $J = 14.6$  Hz, 1H), 2.54-2.37 (m, 2H), 2.12– 2.02 (m, 2H), 1.97-1.93 (d,  $J = 18.5$  Hz, 1H), 1.79-1.72 (m,  $J = 13.9, 9.3, 4.6$  Hz, 1H), 1.46 (dd,  $J = 9.1, 3.6$  Hz, 1H), 1.42 (s, 9H), 1.13 (s, 3H), 0.90 (s, 3H).  $^{13}\text{C NMR}$  (101 MHz,  $\text{CDCl}_3$ )  $\delta$  213.8, 59.5, 57.5, 50.3, 48.1, 42.7, 42.5, 30.1, 26.9, 25.2, 19.9, 19.7. **IR** (neat) 2963, 2922, 2895, 2257, 1746, 1366, 1327, 1161, 1128, 1051, 735, 519  $\text{cm}^{-1}$ .  $^1$ . **HRMS** (ESI)  $m/z$  calcd. for  $\text{C}_{14}\text{H}_{24}\text{O}_3\text{S}_3\text{Na}$   $[\text{M}+\text{Na}]^+$ : Calcd 359.0785, Found 359.0804.

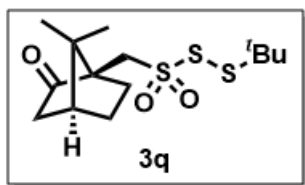

A mixture of 1,4-di-tert-butyltetrasulfane (1 equivalent, 1 mmol, 24.2 mg), ((1R,4S)-7,7-dimethyl-2-oxobicyclo [2.2.1] heptan-1-yl) methanesulfinic acid (1 equivalent, 1 mmol, 21.7 mg),  $[\text{Ir}(\text{dF}(\text{CF}_3)\text{ppy})_2(\text{dtbbpy})]\cdot\text{PF}_6$  (1 mol%, 1.1 mg) were added into a reaction tube. The tube was evacuated and inflated with  $\text{N}_2$  balloon for three times. Then 1 mL ethyl acetate was added and the mixture was stirred for 5 h under blue LEDs (460 nm, 7 W) in a paralleled reactor. **3q** (17.2 mg, 51%) was obtained through column chromatography ( $V_{\text{PE}}/V_{\text{EA}} = 20/1$ ) as a colorless liquid.  $^1\text{H NMR}$  (300 MHz,  $\text{CDCl}_3$ )  $\delta$  3.96-3.91 (d,  $J = 14.6$  Hz, 1H), 3.32-3.27 (d,  $J = 14.6$  Hz, 1H), 2.55-2.36 (m, 2H), 2.13-2.01 (m, 2H), 1.98-1.92 (d,  $J = 18.5$  Hz, 1H), 1.75 (m,  $J = 13.6, 9.2, 4.3$  Hz, 1H), 1.47 (d,  $J = 3.6$  Hz, 1H), 1.42 (s, 8H), 1.13 (s, 3H), 0.90 (s, 3H).  $^{13}\text{C NMR}$  (101 MHz,  $\text{CDCl}_3$ )  $\delta$  213.8, 59.5, 57.5, 50.3, 48.1, 42.7, 42.5, 30.1, 26.9, 25.2, 19.9, 19.7. **IR** (neat) 2963, 2941, 2897,

2257, 1748, 1719, 1456, 1325, 1161, 1128, 754, 731, 596, 557  $\text{cm}^{-1}$ . **HRMS** (ESI)  $m/z$  calcd. for  $\text{C}_{14}\text{H}_{24}\text{O}_3\text{S}_3\text{Na}$   $[\text{M}+\text{Na}]^+$ : Calcd 359.0785, Found 359.0804.

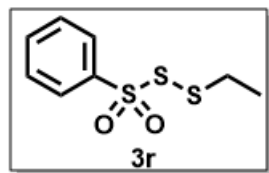

A mixture of 1,4-diethyltetrasulfane (1 equivalent, 1 mmol, 15.7 mg), benzenesulfinic acid (1 equivalent, 1 mmol, 14.2 mg),  $[\text{Ir}(\text{dF}(\text{CF}_3)\text{ppy})_2(\text{dtbbpy})]\cdot\text{PF}_6$  (1 mol%, 1.1 mg) were added into a reaction tube. The tube was evacuated and inflated with  $\text{N}_2$  balloon for three times. Then 1 mL ethyl acetate was added and the mixture was stirred for 4 h under blue LEDs (460 nm, 7 W) in a paralleled reactor. **3r** (10.1 mg, 43%) was obtained through column chromatography ( $V_{\text{hexane}}/V_{\text{EA}} = 20/1$ ) as a colorless liquid.  **$^1\text{H}$  NMR** (400 MHz,  $\text{CDCl}_3$ )  $\delta$  7.98-7.93(m, 2H), 7.68- 7.55(m, 3H), 3.05-2.87 (m, 2H), 1.36-1.27 (m, 3H).  **$^{13}\text{C}$  NMR** 101 MHz,  $\text{CDCl}_3$ )  $\delta$  142.4, 134.0, 129.1, 127.9, 33.7, 13.9. **IR** (neat) 3037, 2968, 2932, 2359, 1449, 1327, 1144, 1078, 716, 685, 602, 592, 538  $\text{cm}^{-1}$ . **HRMS** (EI) Calcd for  $\text{C}_8\text{H}_{10}\text{O}_2\text{S}_3$  233.9843, found 233.9840.

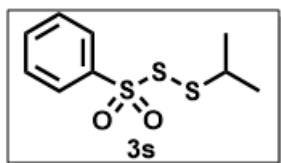

A mixture of 1,4-diisopropyltetrasulfane (1 equivalent, 1 mmol, 21.4 mg), benzenesulfinic acid (1 equivalent, 1 mmol, 14.2 mg),  $[\text{Ir}(\text{dF}(\text{CF}_3)\text{ppy})_2(\text{dtbbpy})]\cdot\text{PF}_6$  (1 mol%, 1.1 mg) were added into a reaction tube. The tube was evacuated and inflated with  $\text{N}_2$  balloon for three times. Then 1 mL ethyl acetate was added and the mixture was stirred for 5 h under blue LEDs (460 nm, 6 W) in a paralleled reactor. **3s** (16.1 mg, 65%) was obtained through column chromatography ( $\text{PE} \rightarrow V_{\text{PE}}/V_{\text{EA}} = 20/1$ ) as a colorless liquid.  **$^1\text{H}$  NMR** (300 MHz,  $\text{CDCl}_3$ )  $\delta$  7.97-7.94 (m, 2H), 7.66 -7.54 (m, 3H), 3.29-3.20 (dt,  $J = 16.3, 6.8$  Hz, 1H), 1.33 (s, 3H), 1.31 (s, 3H).  **$^{13}\text{C}$  NMR** (101 MHz,  $\text{CDCl}_3$ )  $\delta$  142.6, 134.0, 129.1, 127.9, 42.7, 22.2. **IR** (neat) 3067, 2965, 2928, 2866, 1458, 1387, 1366, 1323, 1142, 1076, 754, 739, 716, 685, 588, 536  $\text{cm}^{-1}$ . **HRMS** (EI) Calcd for  $\text{C}_9\text{H}_{12}\text{O}_2\text{S}_3$  247.9999, found 247.9995.

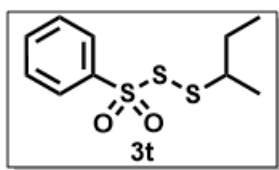

A mixture of 1,4-di-sec-butyltetrasulfane (1 equivalent, 1 mmol, 24.2 mg), benzenesulfinic acid (1 equivalent, 1 mmol, 14.2 mg),  $[\text{Ir}(\text{dF}(\text{CF}_3)\text{ppy})_2(\text{dtbbpy})]\cdot\text{PF}_6$  (1 mol%, 1.1 mg) were added into a reaction tube. The tube was evacuated and inflated with  $\text{N}_2$  balloon for three times. Then 1 mL ethyl acetate was added and the mixture was stirred for 5 h under blue LEDs (460 nm, 5 W) in a paralleled reactor. **3t** (19.7 mg, 75%) was obtained through column chromatography ( $V_{\text{PE}}/V_{\text{EA}} = 50/1$ ) as a colorless liquid.  **$^1\text{H}$  NMR** (400 MHz,  $\text{CDCl}_3$ )  $\delta$  7.97-7.94 (m, 2H), 7.68-7.55 (dt,  $J = 15.2, 7.4$  Hz, 3H), 3.07 – 2.98 (m, 1H), 1.76-1.50 (m, 1H), 1.30 (d,  $J = 6.8$  Hz, 2H), 0.97 (t,  $J = 7.4$  Hz, 1H).  **$^{13}\text{C}$  NMR** (101 MHz,  $\text{CDCl}_3$ )  $\delta$  142.6, 133.9, 129.1, 127.9, 49.5, 28.8, 19.6, 11.2. **IR** (neat) 3067, 2965, 2924, 2874, 1458, 1447, 1325, 1140, 1076, 752, 714, 683  $\text{cm}^{-1}$ . **HRMS** (EI) Calcd for  $\text{C}_{10}\text{H}_{14}\text{O}_2\text{S}_3$  262.0156, found 262.0151.

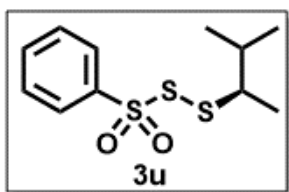

A mixture of 1,4-bis(3-methylbutan-2-yl) tetrasulfane (1 equivalent, 1 mmol, 27.7 mg), benzenesulfinic acid (1 equivalent, 1 mmol, 14.2 mg),  $[\text{Ir}(\text{dF}(\text{CF}_3)\text{ppy})_2(\text{dtbbpy})]\cdot\text{PF}_6$  (1 mol%, 1.1 mg) were added into a reaction tube. The tube was evacuated and inflated with  $\text{N}_2$  balloon for three times. Then 1 mL ethyl acetate was added and the mixture was stirred for 5 h under blue LEDs (460 nm, 8 W) in a paralleled reactor. **3u** (21.0 mg, 75%) was obtained through column chromatography ( $V_{\text{PE}}/V_{\text{EA}} = 100/1$ ) as a colorless liquid.  **$^1\text{H}$  NMR** (400 MHz,  $\text{CDCl}_3$ )  $\delta$  7.98-7.95 (m, 2H), 7.71- 7.64 (m, 1H), 7.61-7.55 (m,  $J = 7.2, 1.9$  Hz, 2H), 3.09-3.02 (m,  $J = 7.0, 4.8$  Hz, 1H), 12.01-1.93 (m,  $J = 13.6, 6.8, 4.7$  Hz, 3H), 1.45-1.21 (m, 3H), 1.02- 0.83 (m, 3H).  **$^{13}\text{C}$  NMR** (101 MHz,  $\text{CDCl}_3$ )  $\delta$  142.5, 133.9, 129.1, 128.0, 77.3, 77.0, 76.6, 54.8, 32.1, 19.9, 17.9, 16.0. **IR** (neat) 3067, 2963, 2909, 2872, 1447, 1325, 1310, 1140, 1076, 752, 714, 683, 584, 532  $\text{cm}^{-1}$ . **HRMS** (EI) Calcd for  $\text{C}_{11}\text{H}_{16}\text{O}_2\text{S}_3$  276.0312, found 276.0313.

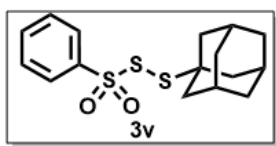

A mixture of 1,4-di((3S,5S,7S)-adamantan-1-yl) tetrasulfane (1 equivalent, 1 mmol, 39.8 mg), benzenesulfinic acid (3 equivalent, 3 mmol, 42.6 mg), [Ir(dF(CF<sub>3</sub>)ppy)<sub>2</sub>(dtbbpy)]·PF<sub>6</sub> (1 mol%, 1.1 mg) were added into a reaction tube. The tube was evacuated and inflated with N<sub>2</sub> balloon for three times. Then 1 mL ethyl acetate was added and the mixture was stirred for 4 h under blue LEDs (460 nm, 5 W) in a paralleled reactor. **3v** (62.0 mg, 91%) was obtained through column chromatography (V<sub>PE</sub>/V<sub>EA</sub> = 100/1) as a white solid. **<sup>1</sup>H NMR** (300 MHz, CDCl<sub>3</sub>) δ 7.94-7.91 (d, *J* = 7.8 Hz, 2H), 7.67-7.65 (dt, *J* = 27.1, 7.4 Hz, 3H), 2.10 (s, 3H), 1.87 (s, 6H), 1.72- 1.62 (m, 6H). **<sup>13</sup>C NMR** (101 MHz, CDCl<sub>3</sub>) δ 143.1, 133.8, 129.0, 127.8, 51.9, 42.6, 35.7, 30.0. **IR** (neat) 3061, 2907, 2851, 1582, 1449, 1323, 1265, 1142, 1076, 748, 714, 683, 641, 536 cm<sup>-1</sup>. **HRMS** (EI) Calcd for C<sub>16</sub>H<sub>20</sub>O<sub>2</sub>S<sub>3</sub> 340.0625, found 340.0618.

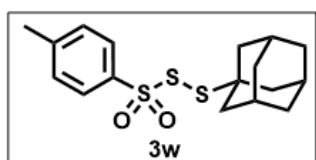

A mixture of 1,4-di((3S,5S,7S)-adamantan-1-yl) tetrasulfane (1 equivalent, 1 mmol, 39.8 mg), 4-methylbenzenesulfinic acid (3 equivalent, 3 mmol, 46.8 mg), [Ir(dF(CF<sub>3</sub>)ppy)<sub>2</sub>(dtbbpy)]·PF<sub>6</sub> (1 mol%, 1.1 mg) were added into a reaction tube. The tube was evacuated and inflated with N<sub>2</sub> balloon for three times. Then 1 mL ethyl acetate was added and the mixture was stirred for 4.5 h under blue LEDs (460 nm, 5 W) in a paralleled reactor. **3w** (49.2 mg, 69%) was obtained through column chromatography (V<sub>PE</sub>/V<sub>EA</sub> = 100/1) as a white solid. **<sup>1</sup>H NMR** (300 MHz, CDCl<sub>3</sub>) δ 7.94-7.79 (m, 2H), 7.42-7.33 (t, *J* = 14.5 Hz, 2H), 2.49- 2.45 (m, 3H), 2.10 (s, 3H), 1.88 -1.80 (m, 6H), 1.72-1.63 (m, 6H). **<sup>13</sup>C NMR** (101 MHz, CDCl<sub>3</sub>) δ 144.9, 140.3, 129.6, 127.9, 51.8, 42.6, 35.7, 30.1, 21.6. **IR** (neat) 2914, 2853, 1449, 1325, 1265, 1142, 812, 748, 702, 652, 593 cm<sup>-1</sup>. **HRMS** (EI) Calcd for C<sub>17</sub>H<sub>22</sub>O<sub>2</sub>S<sub>3</sub> 354.0782, found 354.0774.

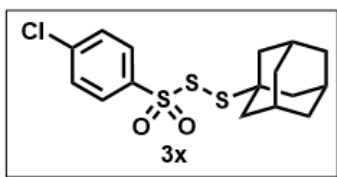

A mixture of 1,4-di((3S,5S,7S)-adamantan-1-yl) tetrasulfane (1 equivalent, 1 mmol, 39.8 mg), 4-chlorobenzenesulfonic acid (1 equivalent, 1 mmol, 17.7 mg),  $[\text{Ir}(\text{dF}(\text{CF}_3)\text{ppy})_2(\text{dtbbpy})]\cdot\text{PF}_6$  (1 mol%, 1.1 mg) were added into a reaction tube. The tube was evacuated and inflated with  $\text{N}_2$  balloon for three times. Then 1 mL ethyl acetate was added and the mixture was stirred for 4.3 h under blue LEDs (460 nm, 8 W) in a paralleled reactor. **3x** (34.4 mg, 92%) was obtained through column chromatography ( $V_{\text{PE}}/V_{\text{EA}} = 100/1$ ) as a white solid.  $^1\text{H NMR}$  (400 MHz,  $\text{CDCl}_3$ )  $\delta$  7.91-7.84 (m, 2H), 7.56-7.51 (m, 2H), 2.12 (s, 3H), 1.89-1.88 (d,  $J = 2.7$  Hz, 6H), 1.72-1.65 (m, 6H).  $^{13}\text{C NMR}$  (101 MHz,  $\text{CDCl}_3$ )  $\delta$  141.4, 140.5, 129.3, 129.2, 52.1, 42.6, 35.7, 30.1. **IR** (neat) 3021, 2905, 2851, 1474, 1395, 1331, 1267, 1144, 1090, 1076, 752, 606, 559  $\text{cm}^{-1}$ . **HRMS** (EI) Calcd for  $\text{C}_{16}\text{H}_{19}\text{ClO}_2\text{S}_3$  374.0236, found 374.0241.

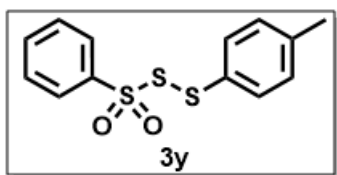

A mixture of 1,4-di-p-tolyltetrasulfane (1 equivalent, 1 mmol, 31.04 mg), benzenesulfonic acid (1 equivalent, 1 mmol, 14.2 mg),  $[\text{Ir}(\text{dF}(\text{CF}_3)\text{ppy})_2(\text{dtbbpy})]\cdot\text{PF}_6$  (1 mol%, 1.1 mg) were added into a reaction tube. The tube was evacuated and inflated with  $\text{N}_2$  balloon for three times. Then 1 mL ethyl acetate was added and the mixture was stirred for 5 h under blue LEDs (460 nm, 6 W) in a paralleled reactor. **3y** (21.1 mg, 71%) was obtained through column chromatography ( $V_{\text{PE}}/V_{\text{EA}} = 50/1$ ) as a colorless liquid.  $^1\text{H NMR}$  (400 MHz,  $\text{CDCl}_3$ )  $\delta$  7.59-7.56 (m, 3H), 7.45-7.41 (m, 2H), 7.26-7.22 (dd,  $J = 11.7, 5.3$  Hz, 2H), 7.15-7.13 (d,  $J = 8.0$  Hz, 2H), 2.38 (s, 3H).  $^{13}\text{C NMR}$  (101 MHz,  $\text{CDCl}_3$ )  $\delta$  143.1, 142.1, 136.4, 133.5, 130.2, 128.7, 127.5, 124.4, 21.4. **IR** (neat) 3061, 2963, 2922, 2859, 1971, 1911, 1447, 1323, 1142, 716, 683, 588, 536  $\text{cm}^{-1}$ . **HRMS** (EI) Calcd for  $\text{C}_{13}\text{H}_{12}\text{O}_2\text{S}_3$  295.9999, found 295.9995.

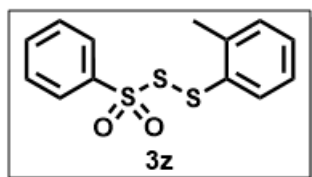

A mixture of 1,4-di-*o*-tolyltetrasulfane (1 equivalent, 1 mmol, 31.1 mg), benzenesulfinic acid (1 equivalent, 1 mmol, 14.2 mg), [Ir(dF(CF<sub>3</sub>)ppy)<sub>2</sub>(dtbbpy)]·PF<sub>6</sub>] (1 mol%, 1.1 mg) were added into a reaction tube. The tube was evacuated and inflated with N<sub>2</sub> balloon for three times. Then 1 mL ethyl acetate was added and the mixture was stirred for 5.5 h under blue LEDs (460 nm, 6 W) in a paralleled reactor. **3z** (19.9 mg, 67%) was obtained through column chromatography (V<sub>PE</sub>/V<sub>EA</sub> = 10/1) as a yellow oily liquid. **<sup>1</sup>H NMR** (400 MHz, CDCl<sub>3</sub>) δ 7.61-7.54 (m, 3H), 7.44-7.33 (m, 4H), 7.23-7.22 (d, *J* = 7.5 Hz, 1H), 7.18-7.14 (t, *J* = 7.6 Hz, 1H), 2.14 (s, 3H). **<sup>13</sup>C NMR** (101 MHz, CDCl<sub>3</sub>) δ 144.2, 143.4, 138.3, 133.5, 131.8, 130.9, 128.8, 127.4, 127.1, 126.9, 20.5. **IR** (neat) 3061, 2970, 2928, 1582, 1470, 1447, 1325, 1144, 1078, 752, 716, 685, 590, 536 cm<sup>-1</sup>. **HRMS** (EI) Calcd for C<sub>13</sub>H<sub>12</sub>O<sub>2</sub>S<sub>3</sub> 295.9999, found 296.0003.

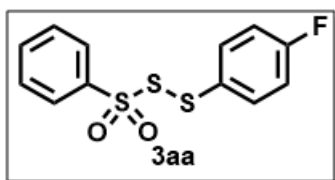

A mixture of 1,4-bis(4-fluorophenyl) tetrasulfane (1 equivalent, 1 mmol, 31.9 mg), benzenesulfinic acid (1 equivalent, 1 mmol, 14.2 mg), [Ir(dF(CF<sub>3</sub>)ppy)<sub>2</sub>(dtbbpy)]·PF<sub>6</sub>] (1 mol%, 1.1 mg) were added into a reaction tube. The tube was evacuated and inflated with N<sub>2</sub> balloon for three times. Then 1 mL ethyl acetate was added and the mixture was stirred for 5 h under blue LEDs (460 nm, 6 W) in a paralleled reactor. **3aa** (22.3 mg, 74%) was obtained through column chromatography (V<sub>PE</sub>/V<sub>EA</sub> = 20/1) as a yellow oily liquid. **<sup>1</sup>H NMR** (400 MHz, CDCl<sub>3</sub>) δ 7.61-7.57 (m, 3H), 7.46-7.43 (m, 2H), 7.37-7.32 (m, 2H), 7.06-7.01 (m, 2H). **<sup>13</sup>C NMR** (126 MHz, CDCl<sub>3</sub>) δ 165.7, 163.7, 142.6, 138.85-138.78 (d, *J* = 9.1 Hz), 133.7, 128.8, 127.5, 123.36-123.33 (d, *J* = 3.4 Hz), 116.87-116.70 (d, *J* = 22.3 Hz). **<sup>19</sup>F NMR** (376 MHz, CDCl<sub>3</sub>) δ -107.22 (s). **IR** (neat) 3096, 3069, 1587, 1325, 1233, 1144, 833, 716, 685, 590 cm<sup>-1</sup>. **HRMS** (EI) Calcd for C<sub>12</sub>H<sub>9</sub>FO<sub>2</sub>S<sub>3</sub> 299.9749, found 299.9744.

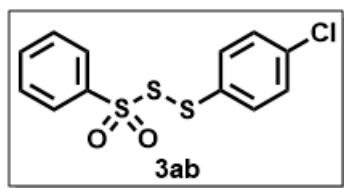

A mixture of 1,4-bis(4-chlorophenyl) tetrasulfane (1 equivalent, 1 mmol, 35.2 mg), benzenesulfinic acid (1 equivalent, 1 mmol, 14.2 mg),  $[\text{Ir}(\text{dF}(\text{CF}_3)\text{ppy})_2(\text{dtbbpy})]\cdot\text{PF}_6$  (1 mol%, 1.1 mg) were added into a reaction tube. The tube was evacuated and inflated with  $\text{N}_2$  balloon for three times. Then 1 mL ethyl acetate was added and the mixture was stirred for 4 h under blue LEDs (460 nm, 6 W) in a paralleled reactor. **3ab** (22.4 mg, 71%) was obtained through column chromatography ( $\text{PE} \rightarrow \text{V}_{\text{PE}}/\text{V}_{\text{EA}} = 20/1$ ) as a white solid.  $^1\text{H NMR}$  (400 MHz,  $\text{CDCl}_3$ )  $\delta$  7.62-7.58(m, 3H), 7.47-7.43 (m, 2H), 7.33-7.27 (m, 4H).  $^{13}\text{C NMR}$  (101 MHz,  $\text{CDCl}_3$ )  $\delta$  142.8, 138.2, 137.6, 133.8, 129.7, 128.9, 127.5, 126.3. **IR** (neat) 3031, 2963, 2924, 2857, 1609, 1468, 1346, 1148, 1096, 1005, 791, 770, 621, 577, 511  $\text{cm}^{-1}$ . **HRMS** (EI) Calcd for  $\text{C}_{12}\text{H}_9\text{ClO}_2\text{S}_3$  315.9453, found 315.9448.

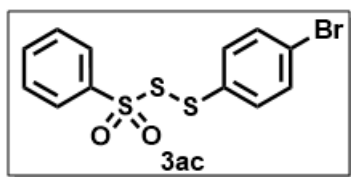

A mixture of 1,4-bis(4-bromophenyl) tetrasulfane (1 equivalent, 1 mmol, 44.0 mg), benzenesulfinic acid (1 equivalent, 1 mmol, 14.2 mg),  $[\text{Ir}(\text{dF}(\text{CF}_3)\text{ppy})_2(\text{dtbbpy})]\cdot\text{PF}_6$  (1 mol%, 1.1 mg) were added into a reaction tube. The tube was evacuated and inflated with  $\text{N}_2$  balloon for three times. Then 1 mL ethyl acetate was added and the mixture was stirred for 3 h under blue LEDs (460 nm, 6 W) in a paralleled reactor. **4ac** (22.7 mg, 63%) was obtained through column chromatography ( $\text{V}_{\text{PE}}/\text{V}_{\text{EA}} = 40/1$ ) as a white solid.  $^1\text{H NMR}$  (300 MHz,  $\text{CDCl}_3$ )  $\delta$  7.66-7.55 (m, 1H), 7.52-7.41 (m, 1H), 7.21 (d,  $J = 8.4$  Hz, 1H).  $^{13}\text{C NMR}$  (101 MHz,  $\text{CDCl}_3$ )  $\delta$  142.8, 137.8, 133.8, 132.7, 128.9, 127.5, 126.9, 126.7. **IR** (neat) 3031, 2955, 2924, 2853, 1560, 1472, 1447, 1327, 1144, 1009, 716, 683, 590, 536, 515  $\text{cm}^{-1}$ . **HRMS** (EI) Calcd for  $\text{C}_{12}\text{H}_9\text{BrO}_2\text{S}_3$  359.8948, found 359.8954.



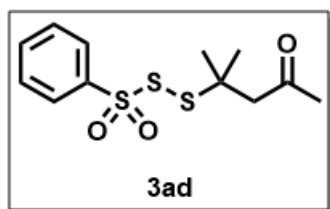

A mixture of 4,4'-tetrasulfanediylbis(4-methylpentan-2-one) (1 equivalent, 1 mmol, 32.7 mg), benzenesulfinic acid (1 equivalent, 1 mmol, 14.2 mg), [Ir(dF(CF<sub>3</sub>)ppy)<sub>2</sub>(dtbbpy)]·PF<sub>6</sub> (1 mol%, 1.1 mg) were added into a reaction tube. The tube was evacuated and inflated with N<sub>2</sub> balloon for three times. Then 1 mL ethyl acetate was added and the mixture was stirred for 5 h under blue LEDs (460 nm, 7 W) in a paralleled reactor. **3ad** (13.8 mg, 48%) was obtained through column chromatography (V<sub>PE</sub>/V<sub>EA</sub> = 5/1) as a yellow oily liquid. **<sup>1</sup>H NMR** (400 MHz, CDCl<sub>3</sub>) δ 7.90-7.88 (d, *J* = 7.6 Hz, 2H), 7.65-7.54 (m, 3H), 2.90 (s, 2H), 2.17 (s, 3H), 1.48 (s, 6H). **<sup>13</sup>C NMR** (101 MHz, CDCl<sub>3</sub>) δ 205.5, 142.7, 134.0, 129.1, 127.8, 53.4, 50.5, 31.2, 27.6. **IR** (neat) 3014, 2941, 1713, 1447, 1364, 1323, 1140, 1076, 754, 714, 583, 532 cm<sup>-1</sup>. **HRMS** (ESI) *m/z* calcd. for C<sub>12</sub>H<sub>16</sub>O<sub>3</sub>S<sub>3</sub>Na [M+Na]<sup>+</sup>: Calcd 327.0159, Found 327.0189.

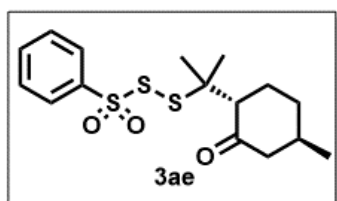

A mixture of 1,4-di-tert-butyltetrasulfane (1 equivalent, 1 mmol, 43.5 mg), benzenesulfinic acid (1 equivalent, 1 mmol, 14.2 mg), [Ir(dF(CF<sub>3</sub>)ppy)<sub>2</sub>(dtbbpy)]·PF<sub>6</sub> (1 mol%, 1.1 mg) were added into a reaction tube. The tube was evacuated and inflated with N<sub>2</sub> balloon for three times. Then 1 mL ethyl acetate was added and the mixture was stirred for 4 h under blue LEDs (460 nm, 8 W) in a paralleled reactor. **3ae**<sup>9</sup> (30.0 mg, 84%) was obtained through column chromatography (V<sub>PE</sub>/V<sub>EA</sub> = 50/1→2/1) as a colorless liquid. **<sup>1</sup>H NMR** (300 MHz, CDCl<sub>3</sub>) δ 7.89-7.87 (m, 2H), 7.67-7.53 (m, 3H), 2.88-2.83 (m, 1H), 2.39-2.31 (m, 2H), 1.97-1.85 (ddd, *J* = 16.7, 9.8, 6.3 Hz, 2H), 1.57-1.49 (m, 6H), 1.43 (s, 3H), 1.04-1.02 (d, *J* = 6.3 Hz, 3H). **<sup>13</sup>C NMR** (101 MHz, CDCl<sub>3</sub>) δ 210.5, 142.7, 133.9, 127.8, 57.6, 54.3, 51.7, 36.4, 34.0, 29.6, 25.7, 25.6, 22.2.

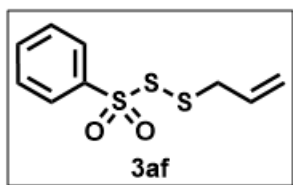

A mixture of 1,4-diallyltetrasulfane (1 equivalent, 1 mmol, 21.1 mg), benzenesulfinic acid (1 equivalent, 1 mmol, 14.2 mg),  $[\text{Ir}(\text{dF}(\text{CF}_3)\text{ppy})_2(\text{dtbbpy})]\cdot\text{PF}_6$  (1 mol%, 1.1 mg) were added into a reaction tube. The tube was evacuated and inflated with  $\text{N}_2$  balloon for three times. Then 1 mL ethyl acetate was added and the mixture was stirred for 10 h under blue LEDs (460 nm, 6 W) in a paralleled reactor. **3af** (13.4 mg, 62%) was obtained through column chromatography ( $V_{\text{PE}}/V_{\text{EA}} = 60/1$ ) as a colorless liquid.  **$^1\text{H}$  NMR** (400 MHz,  $\text{CDCl}_3$ )  $\delta$  7.88-7.86 (dd,  $J = 5.3, 3.4$  Hz, 2H), 7.67-7.62 (m, 1H), 7.57-7.53 (dd,  $J = 10.5, 4.7$  Hz, 2H), 5.84-5.73 (m,  $J = 17.4, 10.1, 7.4$  Hz, 1H), 5.34-5.31 (dd,  $J = 10.1, 0.5$  Hz, 1H), 5.16-5.12 (dd,  $J = 17.1, 1.1$  Hz, 2H), 3.81-3.80 (d,  $J = 7.4$  Hz, 2H).  **$^{13}\text{C}$  NMR** (101 MHz,  $\text{CDCl}_3$ )  $\delta$  138.2, 133.7, 129.0, 128.4, 124.63 (d,  $J = 8.0$  Hz), 60.8. **IR** (neat) 3630, 3090, 2976, 2920, 1447, 1317, 1308, 1292, 1142, 1084, 689, 623, 532  $\text{cm}^{-1}$ . **HRMS** (EI) Calcd for  $\text{C}_9\text{H}_{10}\text{O}_2\text{S}_3$  245.9843, found 245.9845.

**Flow reaction:** A mixture of 1,4-diallyltetrasulfane (1 equivalent, 6 mmol, 1.26 g), benzenesulfinic acid (1 equivalent, 6 mmol, 0.85 g),  $[\text{Ir}(\text{dF}(\text{CF}_3)\text{ppy})_2(\text{dtbbpy})]\cdot\text{PF}_6$  (1 mol%, 60 mg) was added into a 250 mL three-necked flask. The flask along with the micro cube were evacuated and filled with  $\text{N}_2$  three times at room temperature. Then ethyl acetate (80 mL) was added and the mixture was stirred for 13 h under blue LEDs (430 nm, 118 W totally) in a paralleled reactor. The flask was equipped with rubber plugs, with inlet and outlet of micro tube, which was made of glass tubing (O.D. = 5 mm, I.D. = 2 mm, length = 2.88 m, volume = 4.45 mL). The solution was pumped by a pump (0.5 mL/min) into the micro tube, then returned to flask. This circulatory system was irradiated by Blue LEDs. After the reaction, ethyl acetate (10 mL) was pumped into the tube to flush out residual fluid. After evaporation of solvent, the residue was purified by column chromatography on silica gel (PE/EA = 60:1) and concentrated in vacuo to afford the required compound **3af** (69%, 1.020 g).

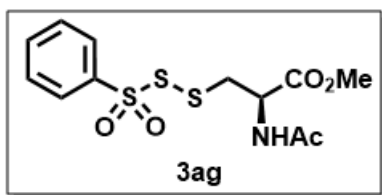

A mixture of dimethyl 3,3'-tetrasulfanediyl (2R,2'R) -bis (2 - acetamidopropanoate) (1 equivalent, 1 mmol, 41.7 mg), benzenesulfinic acid (1 equivalent, 1 mmol, 14.2 mg), [Ir(dF(CF<sub>3</sub>)ppy)<sub>2</sub>(dtbbpy)]·PF<sub>6</sub>] (1 mol%, 1.1 mg) were added into a reaction tube. The tube was evacuated and inflated with N<sub>2</sub> balloon for three times. Then 1 mL tetrahydrofuran was added and the mixture was stirred for 12 h under blue LEDs (460 nm, 6 W) in a paralleled reactor. **3ag** (15.3 mg, 44%) was obtained through column chromatography (V<sub>PE</sub>/V<sub>EA</sub> = 10/1→2/1) as a colorless liquid. <sup>1</sup>H NMR (400 MHz, CDCl<sub>3</sub>) δ 7.53-7.50(m, 2H), 7.37-7.33 (m, 2H), 7.29-7.27 (dd, *J* = 4.8, 3.7 Hz, 1H), 6.21-6.20 (d, *J* = 6.1 Hz, 1H), 4.90-4.88 (dt, *J* = 7.5, 4.9 Hz, 1H), 3.76 (s, 3H), 3.26-3.24 (m, 2H), 1.94 (s, 3H). <sup>13</sup>C NMR (126 MHz, CDCl<sub>3</sub>) δ 170.7, 169.7, 136.6, 129.2, 128.3, 127.5, 52.7, 51.6, 40.6, 23.0. IR (neat) 3059, 2967, 2938, 2866, 2361, 1468, 1368, 1321, 1144, 1125, 1051, 748, 662, 588 cm<sup>-1</sup>. HRMS (DART) *m/z* calcd. for C<sub>12</sub>H<sub>16</sub>NO<sub>5</sub>S<sub>3</sub> [M+H]<sup>+</sup>: Calcd 350.0191, found 350.0183.

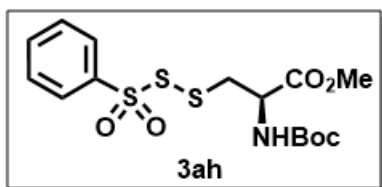

A mixture of dimethyl 3,3'-tetra-sulfanediyl(2R,2'R)-bis(2-((tert-butoxycarbonyl) amino) propanoate) (1 equivalent, 1 mmol, 52.7 mg), benzenesulfinic acid (1 equivalent, 1 mmol, 14.2 mg), [Ir(dF(CF<sub>3</sub>)ppy)<sub>2</sub>(dtbbpy)]·PF<sub>6</sub>] (1 mol%, 1.1 mg) were added into a reaction tube. The tube was evacuated and inflated with N<sub>2</sub> balloon for three times. Then 1 mL tetrahydrofuran was added and the mixture was stirred for 4 h under blue LEDs (460 nm, 7 W) in a paralleled reactor. **3ah** (16.1 mg, 40%) was obtained through column chromatography (V<sub>PE</sub>/V<sub>EA</sub> = 100/1→ 5/1) as a colorless liquid. <sup>1</sup>H NMR (300 MHz, CDCl<sub>3</sub>) δ 7.54-7.51(dd, *J* = 5.3, 3.3 Hz, 2H), 7.37-7.28 (m, 3H), 5.31-5.29 (d, *J* = 7.2 Hz, 1H), 4.63 (s, 1H), 3.74 (s, 3H), 3.26-2.98 (m, 2H), 1.44 (s, 9H). <sup>13</sup>C NMR (101 MHz, CDCl<sub>3</sub>) δ 171.0, 154.9, 129.1, 128.3, 127.8, 127.4, 80.2, 52.8, 52.6, 40.9, 28.2. IR (neat) 3049, 2928, 1468, 1458, 1368, 1323, 1256, 1161, 1144, 1126, 716, 664, 588 cm<sup>-1</sup>. HRMS (ESI) *m/z* calcd. for C<sub>15</sub>H<sub>21</sub>NO<sub>6</sub>S<sub>3</sub>Na [M+Na]<sup>+</sup>: Calcd 430.0423, found 430.0421.

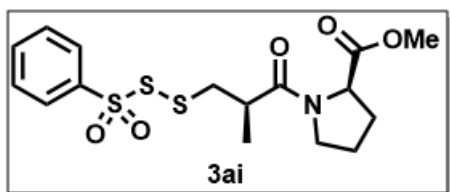

A mixture of dimethyl ((2R,2'R)-3,3'-tetrasulfanediybis (2- methylpentanoyl)) (2'R)-di-D-prolinate (1 equivalent, 1 mmol, 52.5 mg), benzenesulfinic acid (3 equivalent, 3 mmol, 42.6 mg), [Ir(dF(CF<sub>3</sub>)ppy)<sub>2</sub>(dtbbpy)]·PF<sub>6</sub>] (1 mol%, 1.1 mg) were added into a reaction tube. The tube was evacuated and inflated with N<sub>2</sub> balloon for three times. Then 1 mL tetrahydrofuran was added and the mixture was stirred for 11 h under blue LEDs (460 nm, 6 W) in a paralleled reactor. **3ai** (26.5 mg, 33%) was obtained through column chromatography (V<sub>PE</sub>/V<sub>EA</sub> = 60/1) as a colorless liquid. **<sup>1</sup>H NMR** (501 MHz, CDCl<sub>3</sub>) δ 7.53-7.52 (m, 2H), 7.33-7.30 (t, *J* = 7.7 Hz, 2H), 7.23-7.20 (t, *J* = 7.4 Hz, 1H), 4.50-4.48 (dd, *J* = 8.6, 3.9 Hz, 1H), 3.71 (s, 3H), 3.55-3.50 (m, *J* = 9.4, 7.8, 5.0 Hz, 1H), 3.29-3.25 (dt, *J* = 9.6, 7.1 Hz, 1H), 3.14-3.10 (dd, *J* = 13.4, 8.6 Hz, 1H), 3.02-2.93 (m, 1H), 2.71-2.66 (m, 1H), 2.18-2.11 (m, *J* = 16.5, 9.6, 7.0 Hz, 1H), 2.03-1.88 (m, 3H), 1.21-1.19 (d, *J* = 6.9 Hz, 3H). **<sup>13</sup>C NMR** (126 MHz, CDCl<sub>3</sub>) δ 173.2, 172.7, 137.3, 128.9, 127.4, 126.8, 58.5, 52.1, 46.5, 41.7, 37.3, 28.9, 24.7, 16.7. **IR** (neat) 3069, 2972, 2851, 2359, 1744, 1641, 1433, 1327, 1196, 1172, 1146, 741, 689, 592 cm<sup>-1</sup>. **HRMS** (DART) *m/z* calcd. for C<sub>16</sub>H<sub>22</sub>NO<sub>5</sub>S<sub>3</sub> [M+H]<sup>+</sup>: Calcd 404.0660, found 404.0652.

## VIII. X-ray Crystallography Analysis

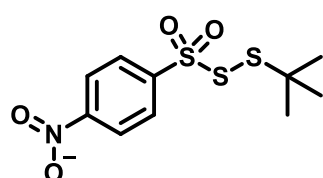

3j

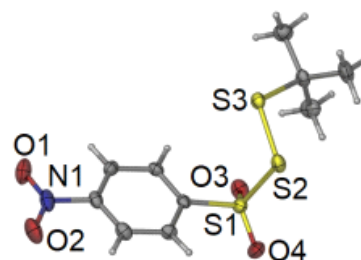

X-ray 3j  
CDCC: 2105227

solvent system: DCM/hexane; method for crystal growth: volatilization at rt;

### Datablock: exp\_936

|                        |                                            |                                 |
|------------------------|--------------------------------------------|---------------------------------|
| Bond precision:        | C-C = 0.0019 Å                             | Wavelength=1.54184              |
| Cell:                  | a=12.5171(1) b=6.9957(1) c=22.7966(2)      |                                 |
|                        | alpha=90 beta=100.667(1) gamma=90          |                                 |
| Temperature:           | 100 K                                      |                                 |
|                        | Calculated                                 | Reported                        |
| Volume                 | 1961.71(4)                                 | 1961.71(4)                      |
| Space group            | P 21/n                                     | P 21/n 1                        |
| Hall group             | -P 2yn                                     | -P 2yn                          |
| Moiety formula         | C20 H20 N O4, C2 F3 O2                     | C20 H20 N O4, C2 F3 O2          |
| Sum formula            | C22 H20 F3 N O6                            | C22 H20 F3 N O6                 |
| Mr                     | 451.39                                     | 451.39                          |
| Dx, g cm <sup>-3</sup> | 1.528                                      | 1.528                           |
| Z                      | 4                                          | 4                               |
| Mu (mm <sup>-1</sup> ) | 1.118                                      | 1.118                           |
| F000                   | 936.0                                      | 936.0                           |
| F000'                  | 939.65                                     |                                 |
| h, k, lmax             | 15, 8, 28                                  | 15, 8, 28                       |
| Nref                   | 4004                                       | 3978                            |
| Tmin, Tmax             | 0.741, 0.782                               | 0.014, 1.000                    |
| Tmin'                  | 0.596                                      |                                 |
| Correction method=     | # Reported T Limits: Tmin=0.014 Tmax=1.000 |                                 |
| AbsCorr =              | MULTI-SCAN                                 |                                 |
| Data completeness=     | 0.994                                      | Theta(max)= 74.395              |
| R(reflections)=        | 0.0429( 3684)                              | wR2(reflections)= 0.1196( 3978) |
| S =                    | 1.058                                      | Npar= 321                       |

The following ALERTS were generated. Each ALERT has the format  
[test-name\\_ALERT\\_alert-type\\_alert-level](#).  
 Click on the hyperlinks for more details of the test.

#### ●Alert level C

|                   |                                                  |       |          |
|-------------------|--------------------------------------------------|-------|----------|
| PLAT250_ALERT_2_C | Large U3/U1 Ratio for Average U(i,j) Tensor .... | 3.2   | Note     |
| PLAT906_ALERT_3_C | Large K Value in the Analysis of Variance .....  | 2.775 | Check    |
| PLAT911_ALERT_3_C | Missing FCF Refl Between Thmin & STh/L=          | 0.600 | 6 Report |

#### ●Alert level G

|                   |                                                  |         |        |
|-------------------|--------------------------------------------------|---------|--------|
| PLAT002_ALERT_2_G | Number of Distance or Angle Restraints on AtSite | 7       | Note   |
| PLAT003_ALERT_2_G | Number of Uiso or Uij Restrained non-H Atoms ... | 6       | Report |
| PLAT007_ALERT_5_G | Number of Unrefined Donor-H Atoms .....          | 1       | Report |
| PLAT143_ALERT_4_G | s.u. on c - Axis Small or Missing .....          | 0.00020 | Ang.   |
| PLAT172_ALERT_4_G | The CIF-Embedded .res File Contains DFIX Records | 4       | Report |
| PLAT176_ALERT_4_G | The CIF-Embedded .res File Contains SADI Records | 1       | Report |
| PLAT178_ALERT_4_G | The CIF-Embedded .res File Contains SIMU Records | 1       | Report |
| PLAT186_ALERT_4_G | The CIF-Embedded .res File Contains ISOR Records | 1       | Report |
| PLAT231_ALERT_4_G | Hirshfeld Test (Solvent) F3' --C22               | 6.5     | s.u.   |
| PLAT244_ALERT_4_G | Low 'Solvent' Ueq as Compared to Neighbors of    | C22     | Check  |
| PLAT300_ALERT_4_G | Atom Site Occupancy of F1 Constrained at         | 0.5     | Check  |

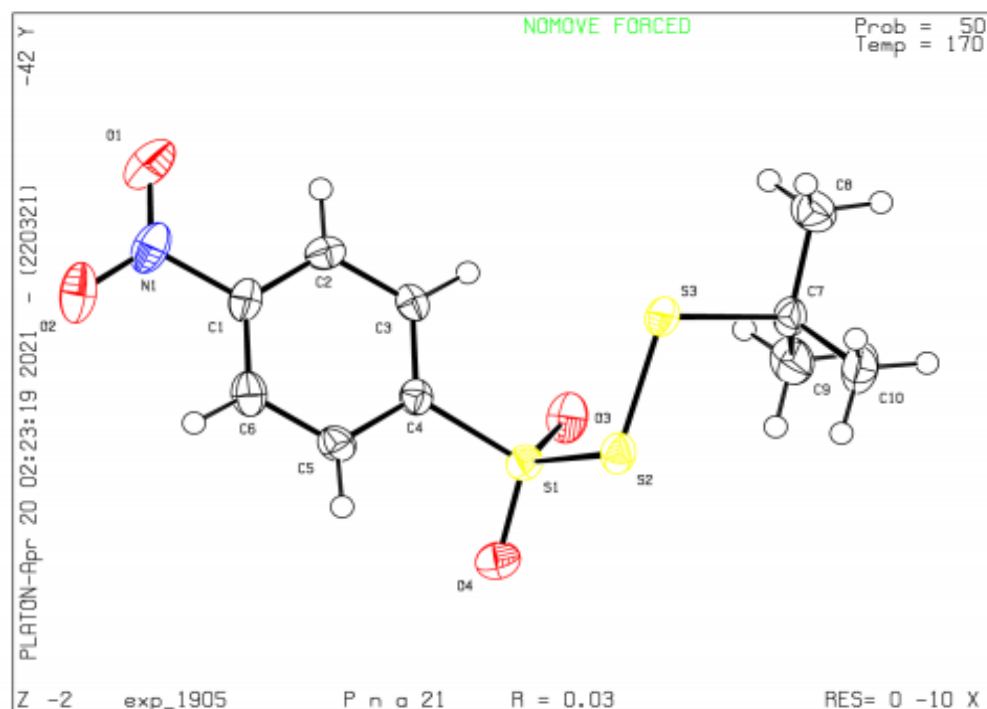

## IX. References

1. Z. Wu, D. A. Pratt, *J. Am. Chem. Soc.*, 2020, **142**, 10284.
2. G. Barany, A. L. Schroll, A. W. Mott, D. A. Halsrud, *J. Org. Chem.*, 1983, **48**, 4750.
3. M. M. Cerda, M. D. Hammers, M. S. Earp, L. N. Zakharov, M. D. Pluth, *Org. Lett.*, 2017, **19**, 2314.
4. M. Arisawa, K. Tanaka, M. Yamaguchi, *Tetrahedron Lett.*, 2005, **46**, 4797.
5. E. Zysman-Colman, D. N. Harpp, *J. Org. Chem.*, 2003, **68**, 2487.
6. R. Kaur, A. Tiwari, M. Manish, I. K. Maurya, R. Bhatnagar, S. Singh, *J. Ethnopharmacol.*, 2021, **264**, 113230.
7. P. Qian, Y. Deng, H. Mei, J. Han, J. Zhou, Y. Pan, *Org. Lett.*, 2017, **19**, 4798.
8. L. Cao, S.H. Luo, K. Jiang, Z. F. Hao, B. W. Wang, C. M. Pang, Z. Y. Wang, *Org. Lett.*, 2018, **20**, 4754.
9. Z. Wu, D. A. Pratt, *Angew. Chem., Int. Ed.*, 2021, **60**, 15598.

<sup>1</sup>H NMR of By-product a

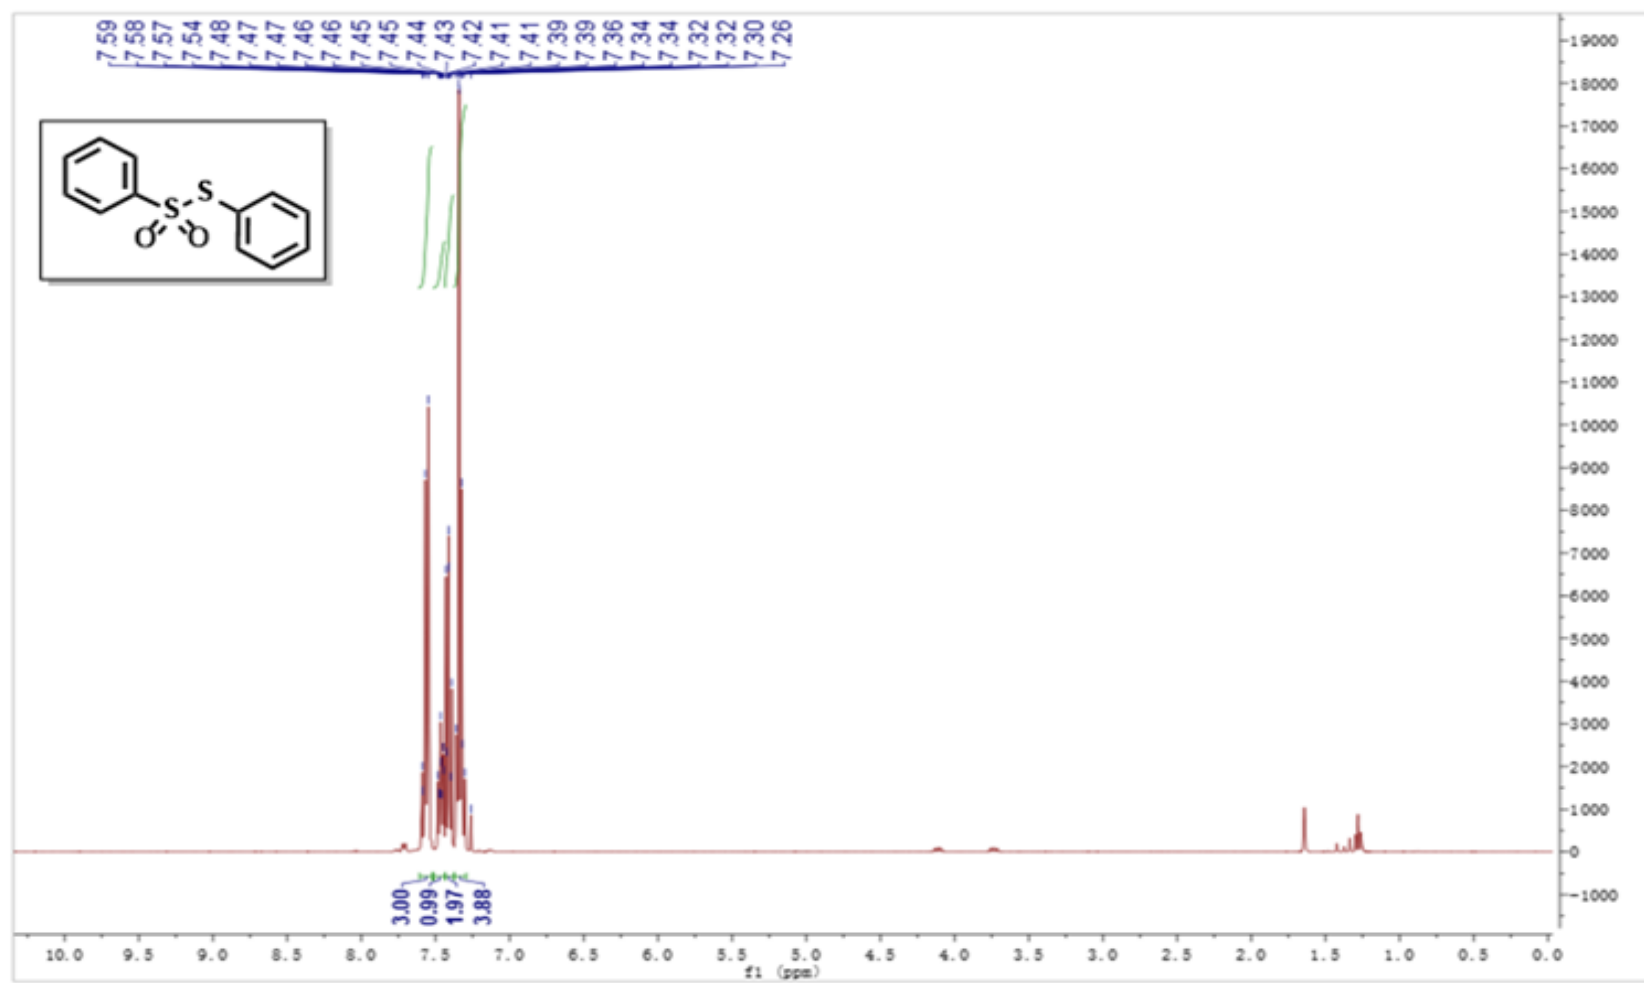

**<sup>13</sup>C NMR of By-product a**

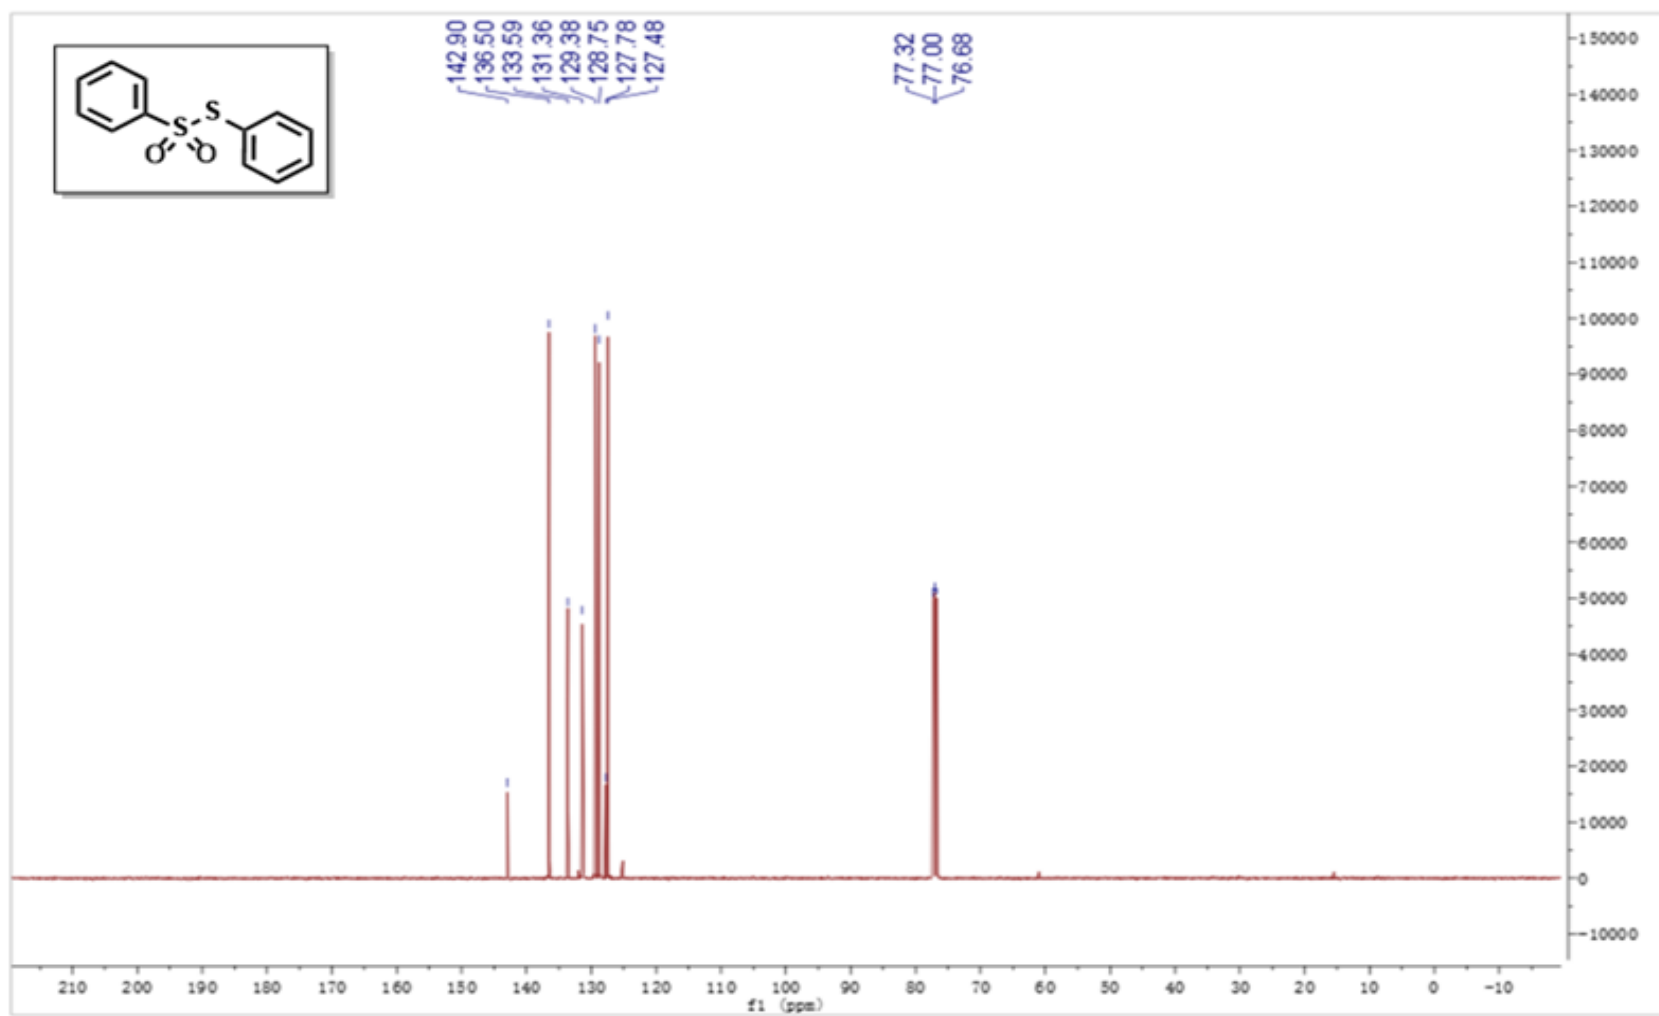



<sup>1</sup>H NMR of 2d

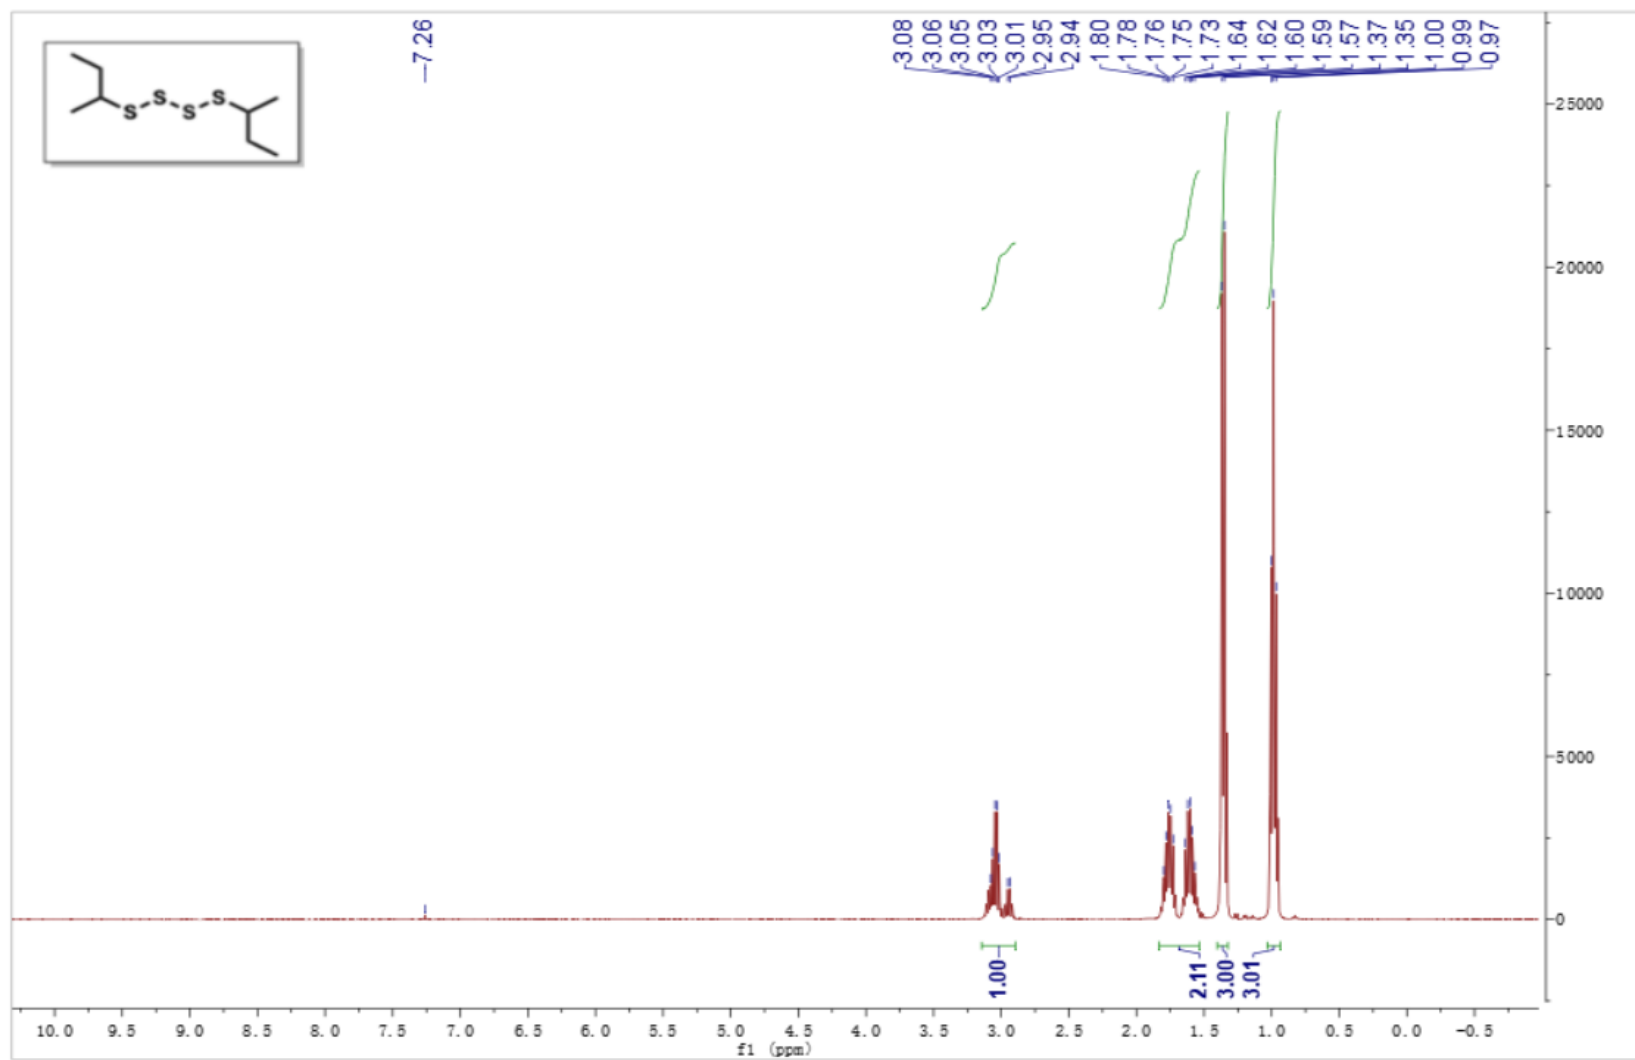

**$^{13}\text{C}$  NMR of 2d**

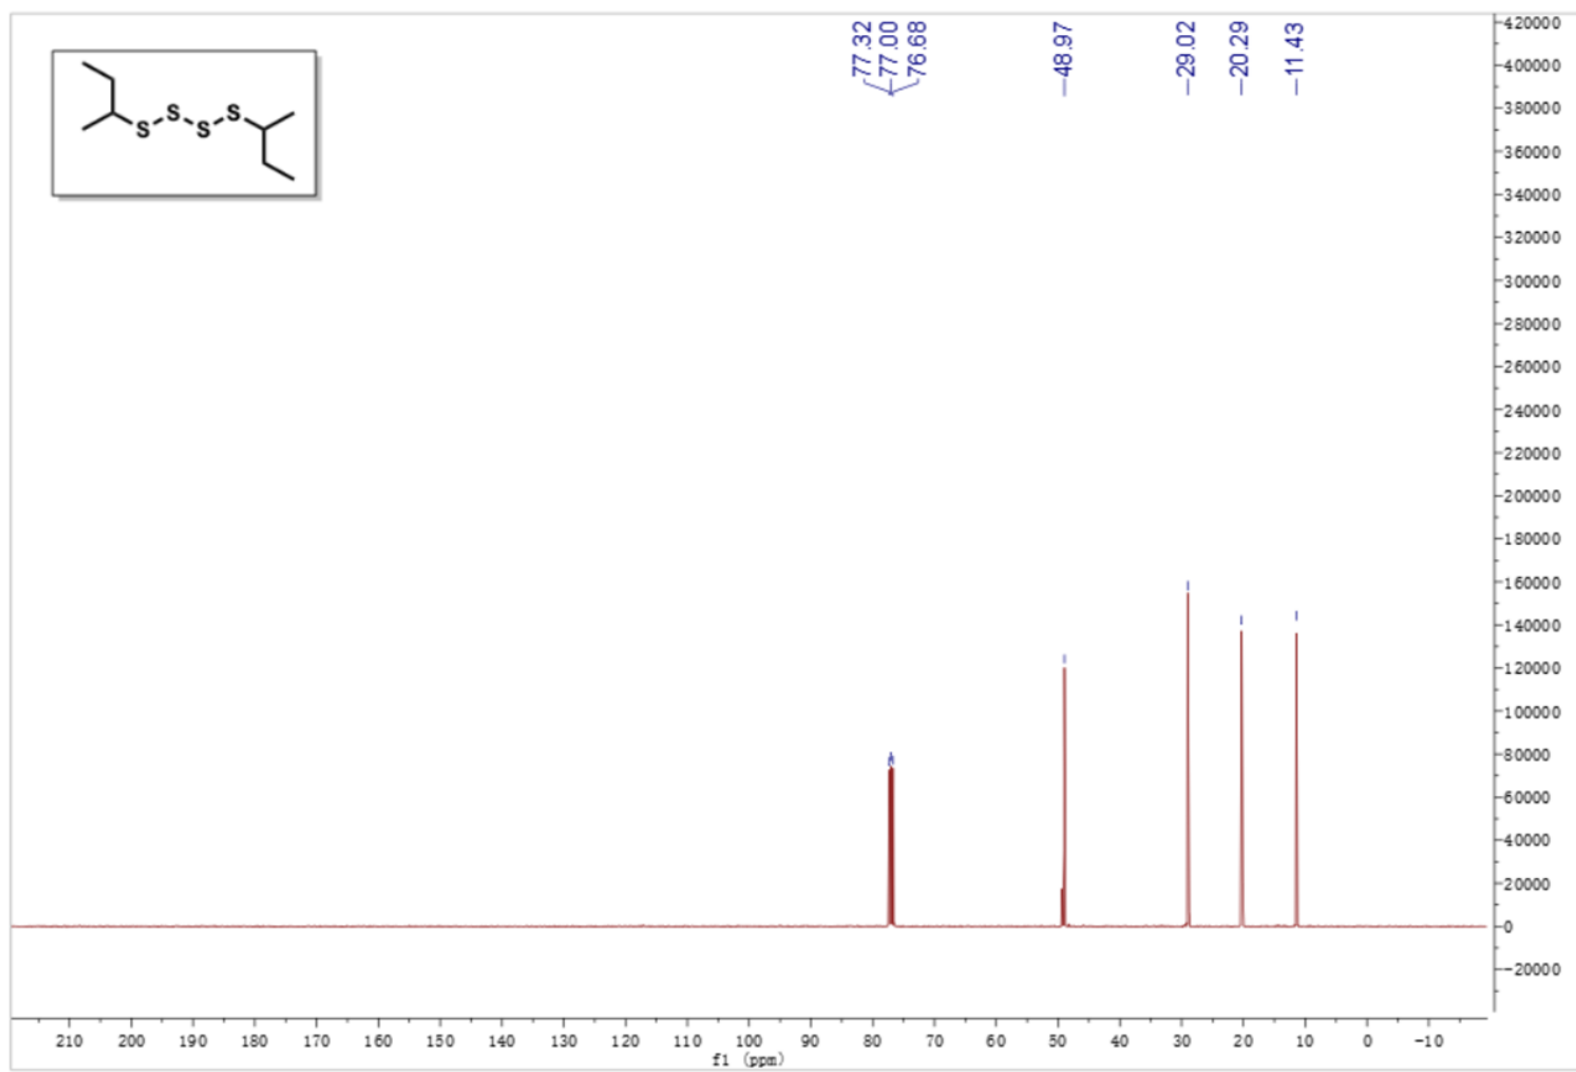

<sup>1</sup>H NMR of 2e

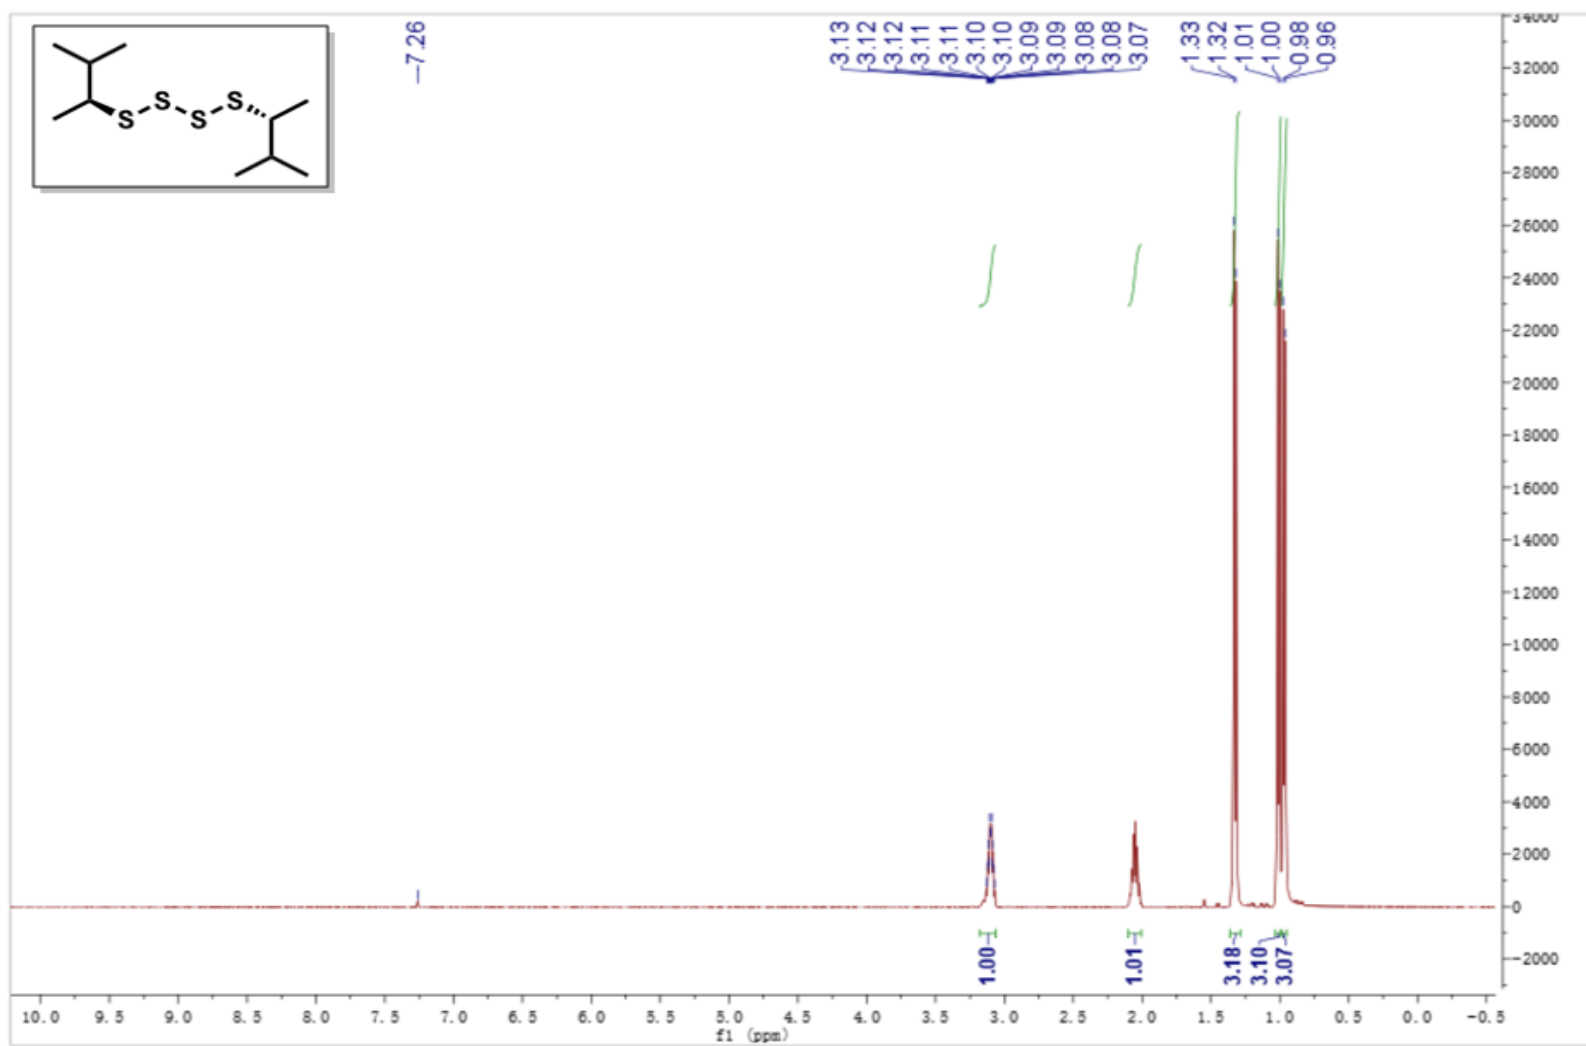

<sup>13</sup>C NMR of 2e

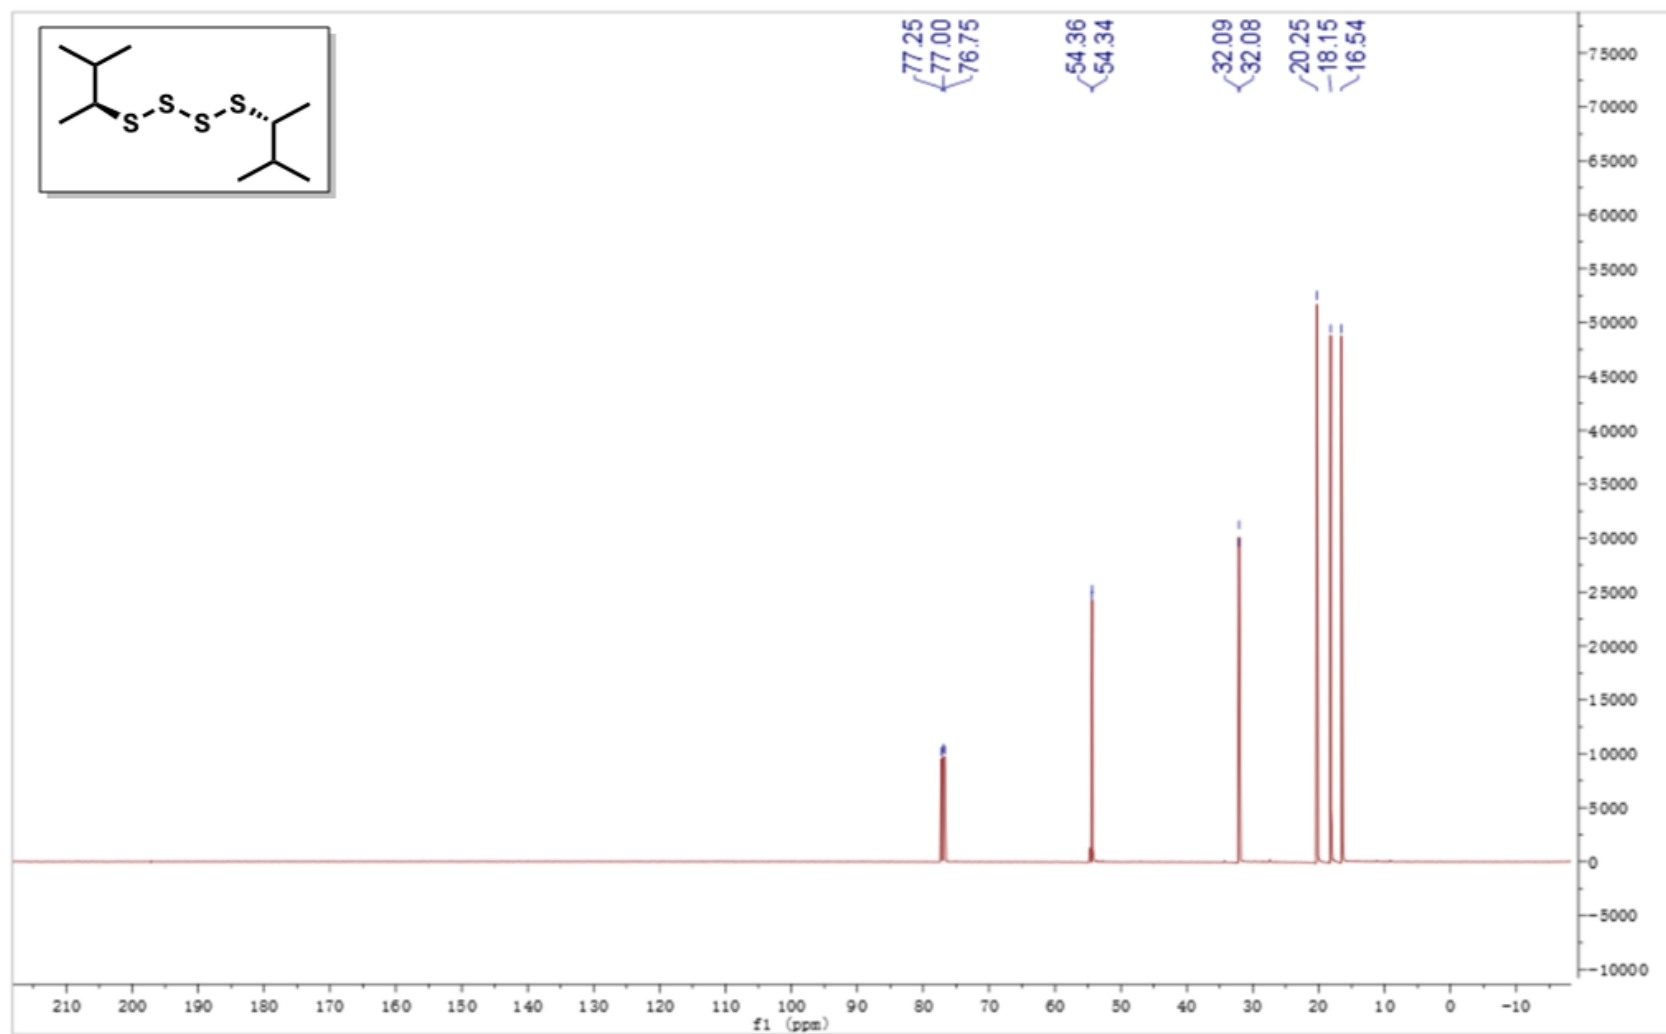

<sup>1</sup>H NMR of 2f

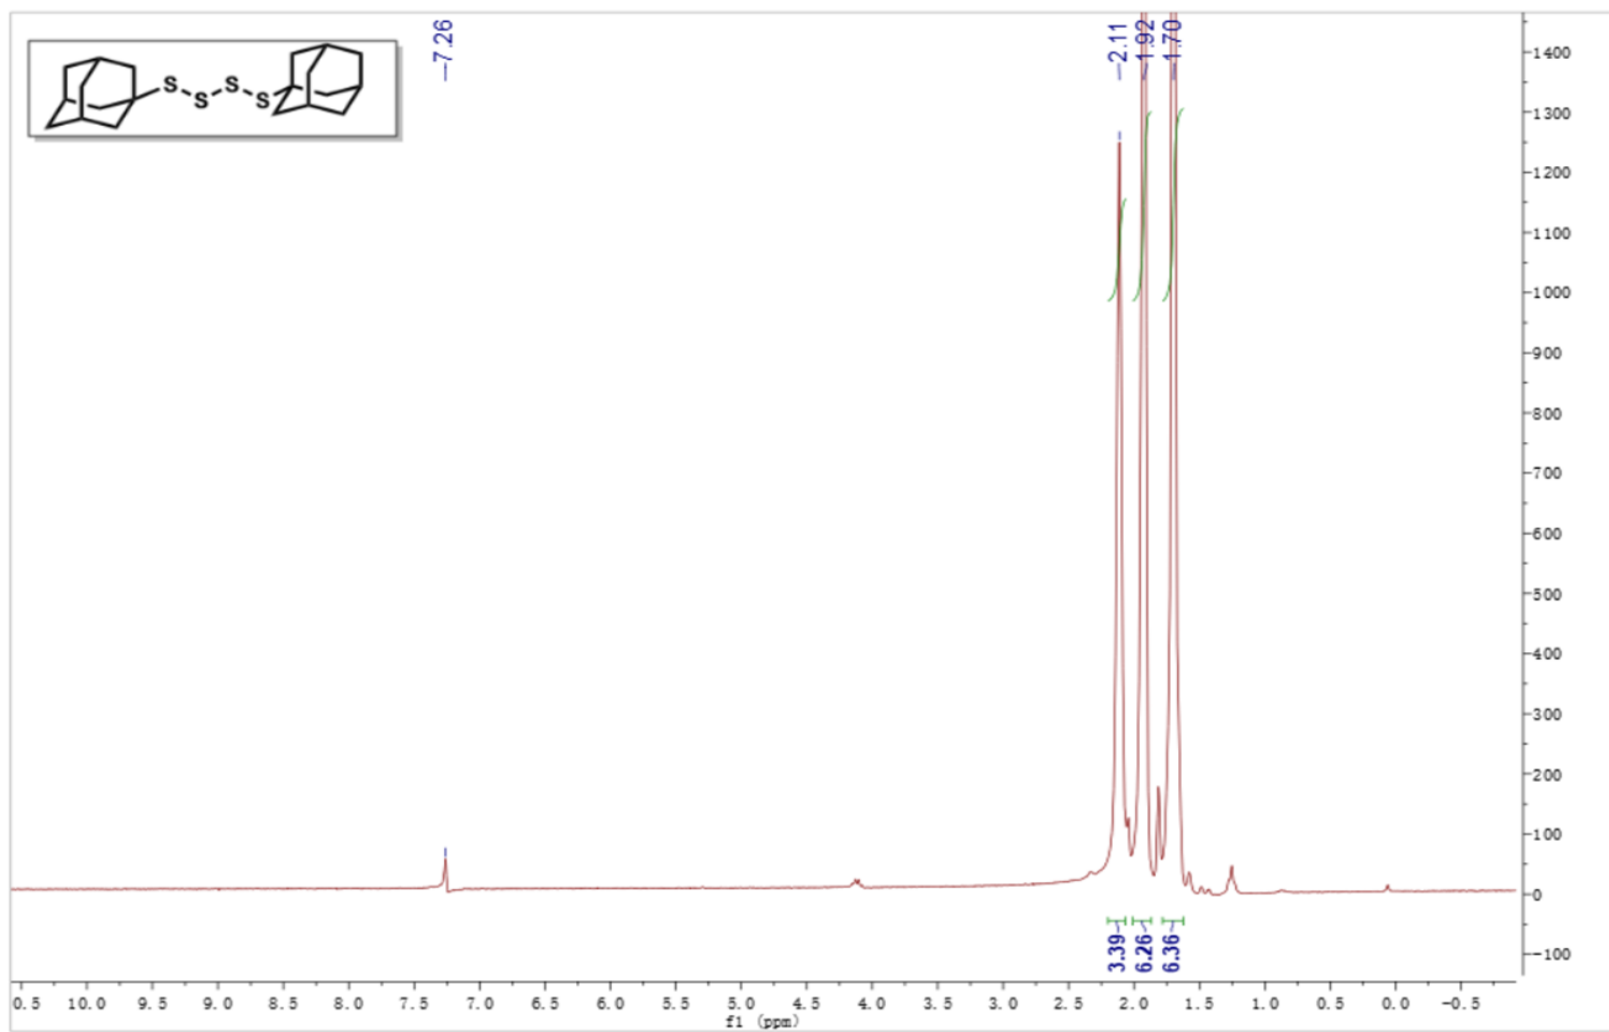

<sup>13</sup>C NMR of 2f

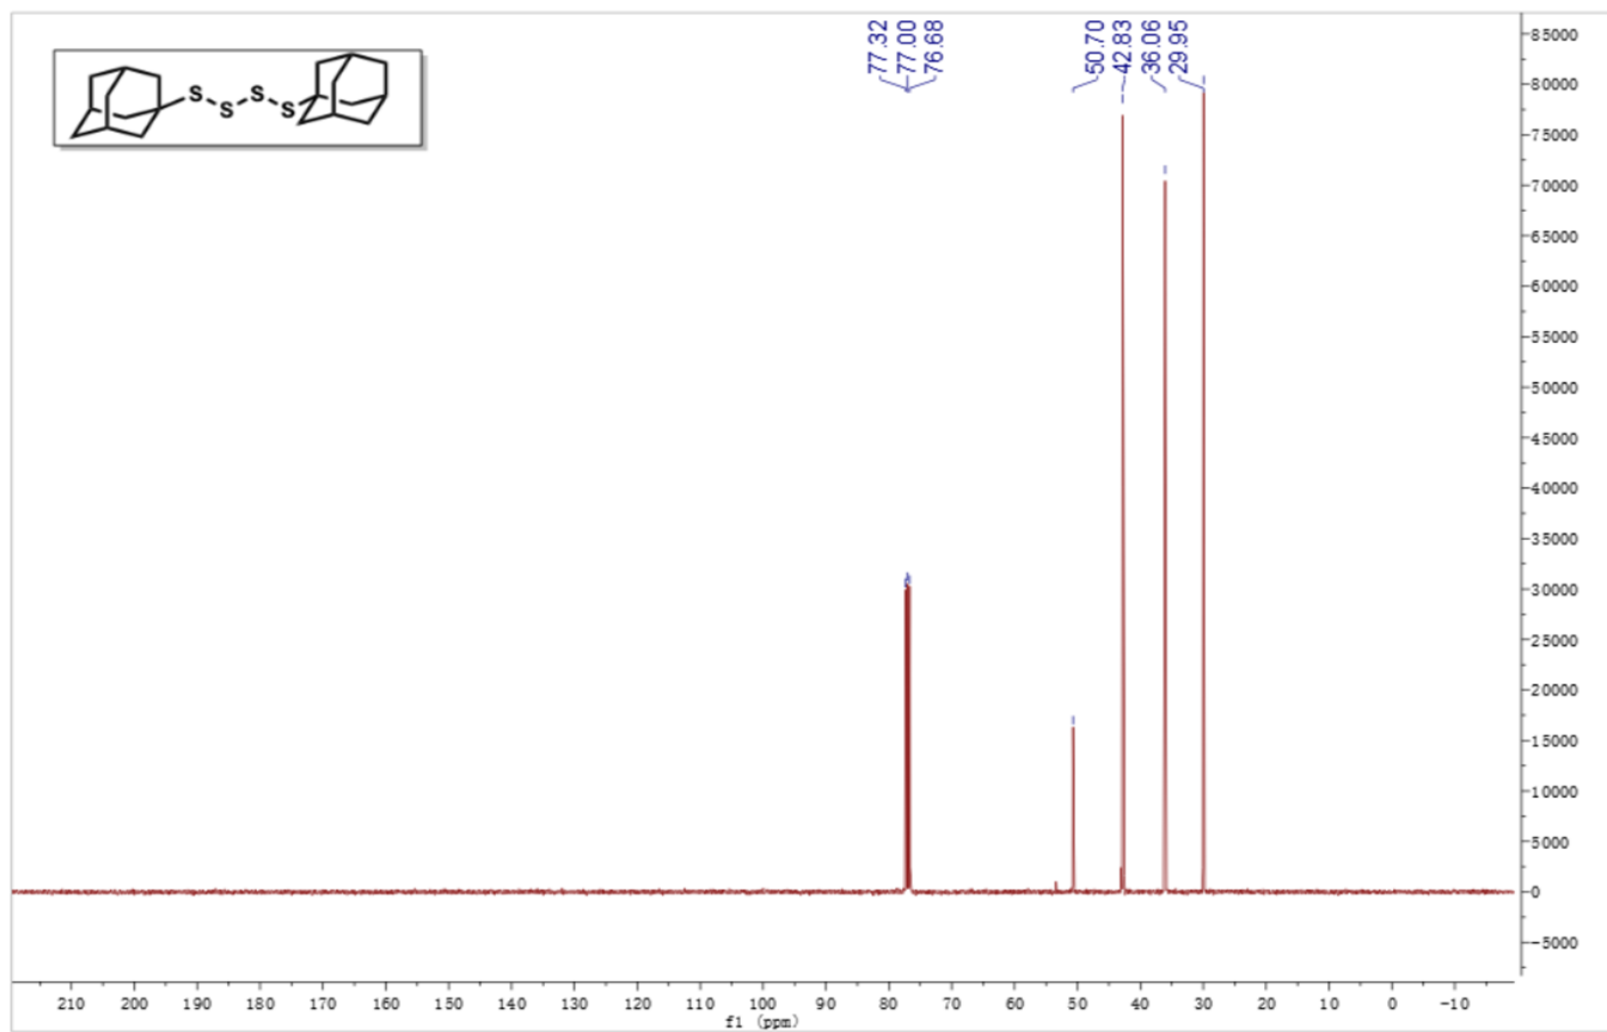

<sup>1</sup>H NMR of 2m

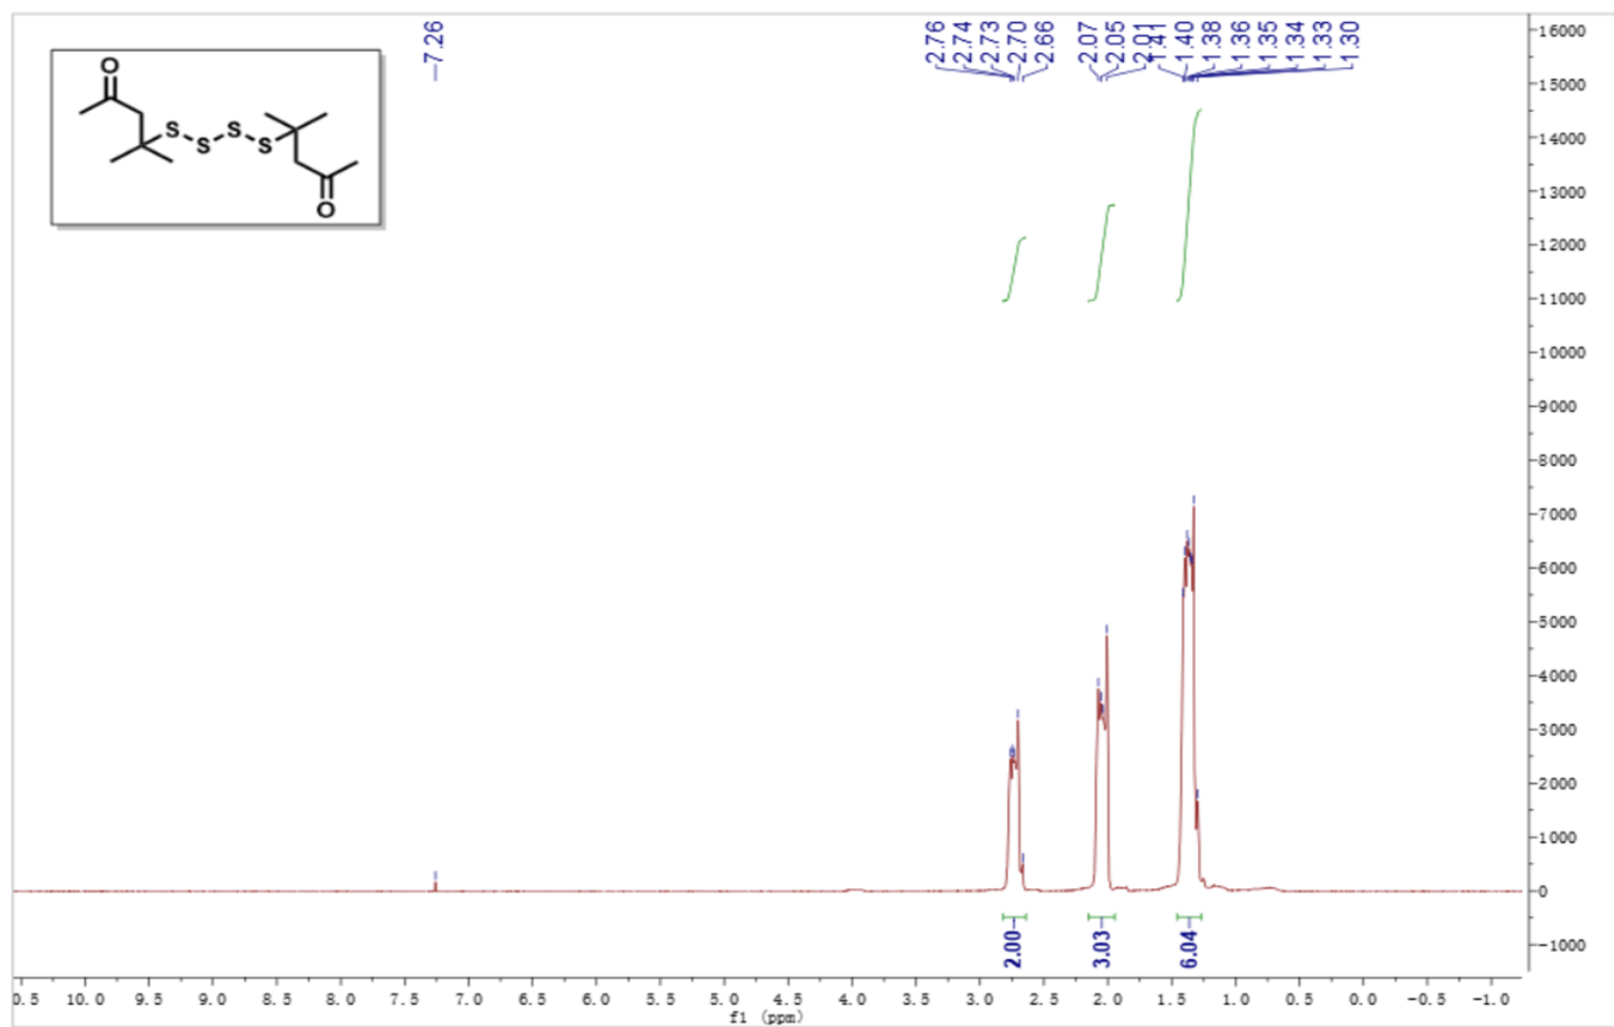

<sup>13</sup>C NMR of 2m

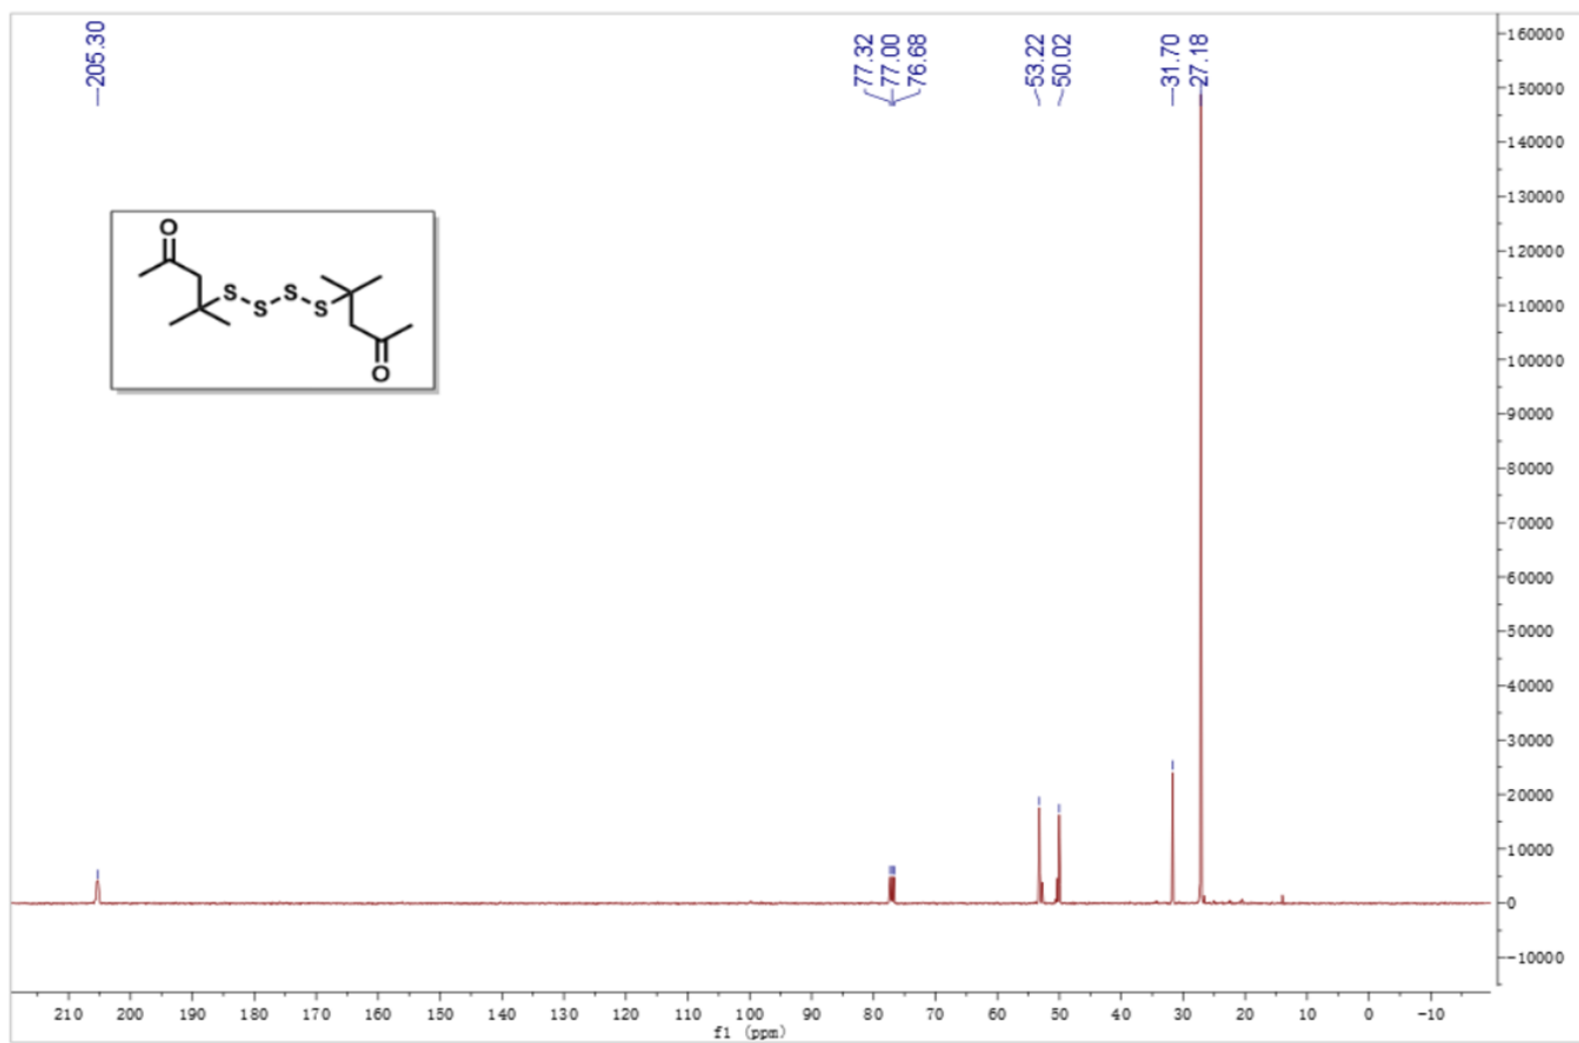



<sup>1</sup>H NMR of 2n

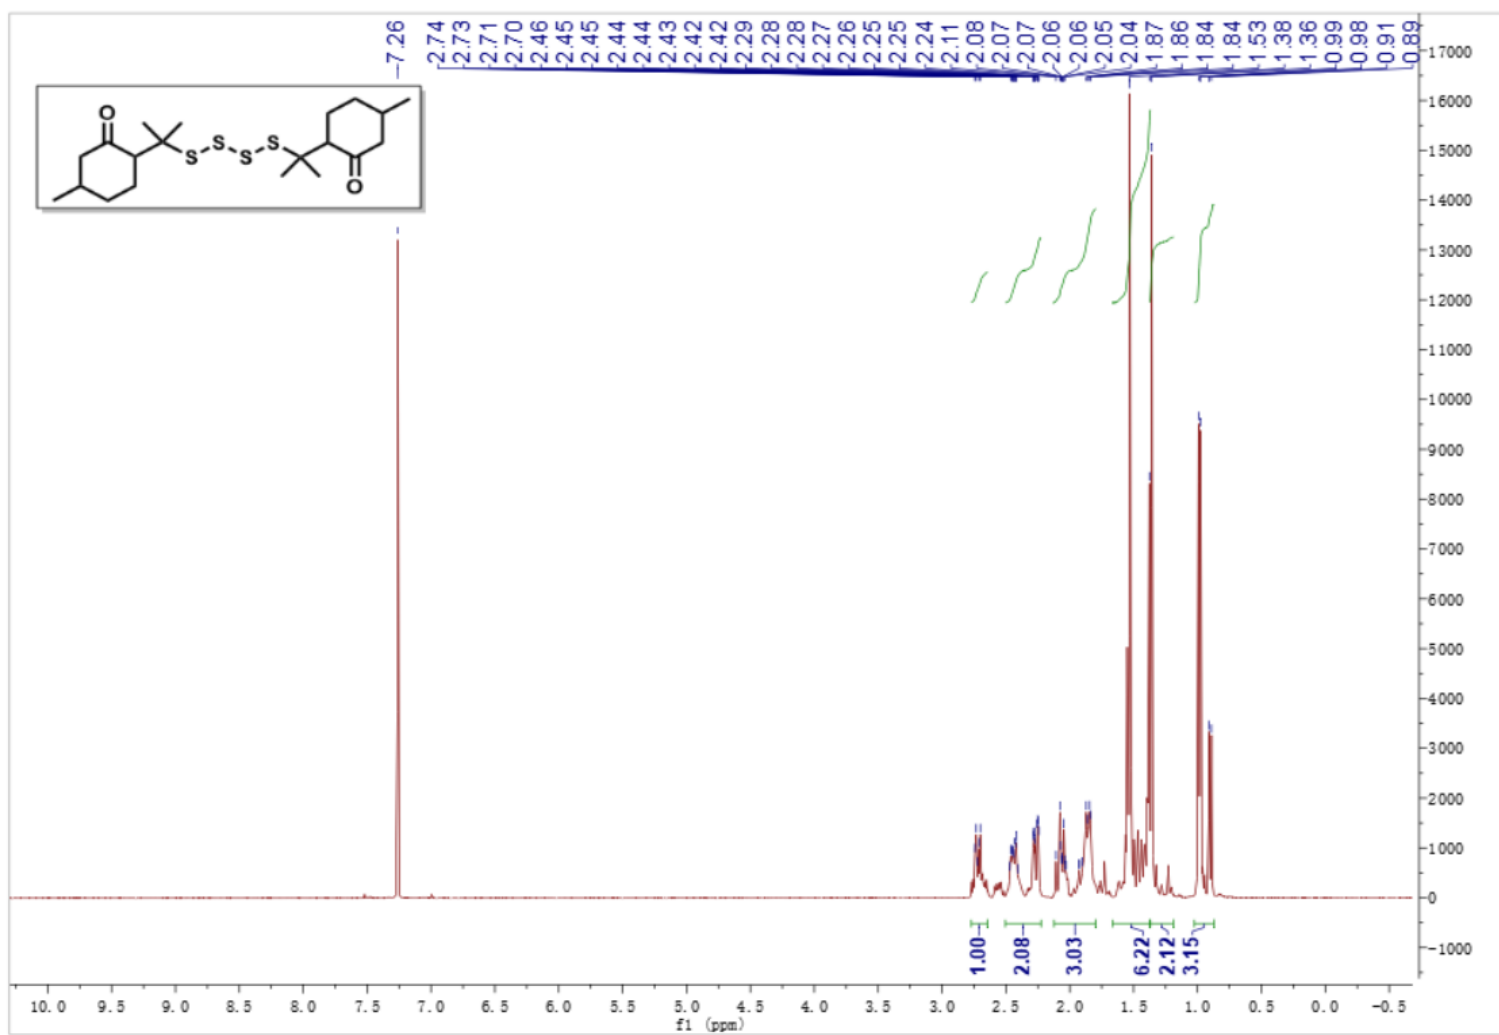

**$^{13}\text{C}$  NMR of 2n**

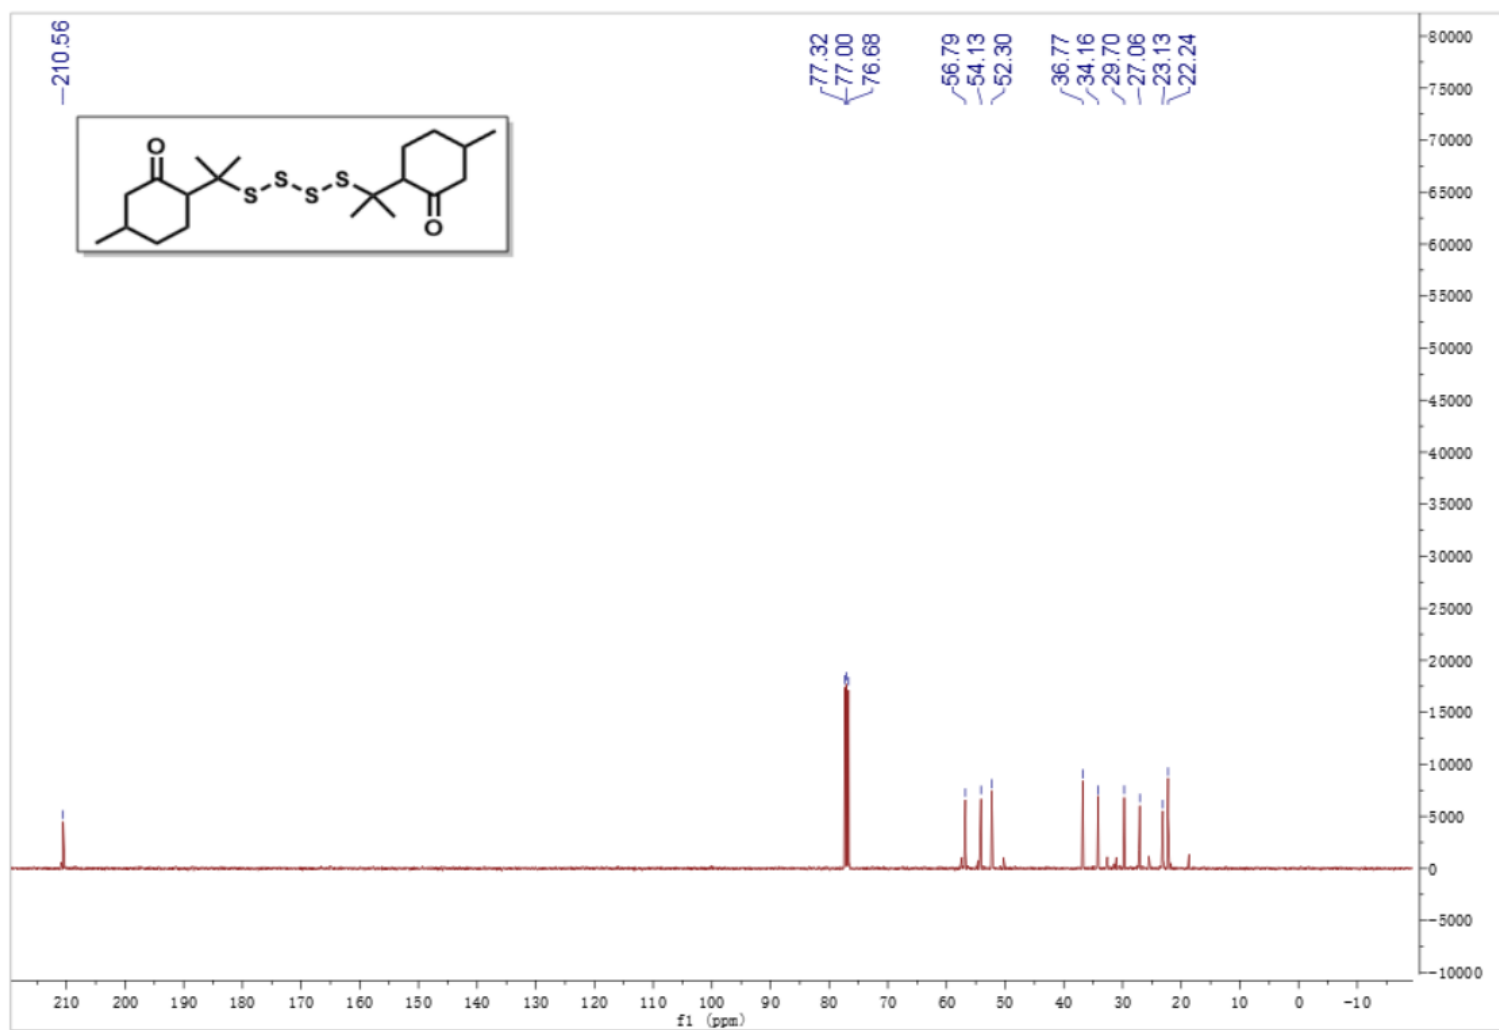

<sup>1</sup>H NMR of 2o

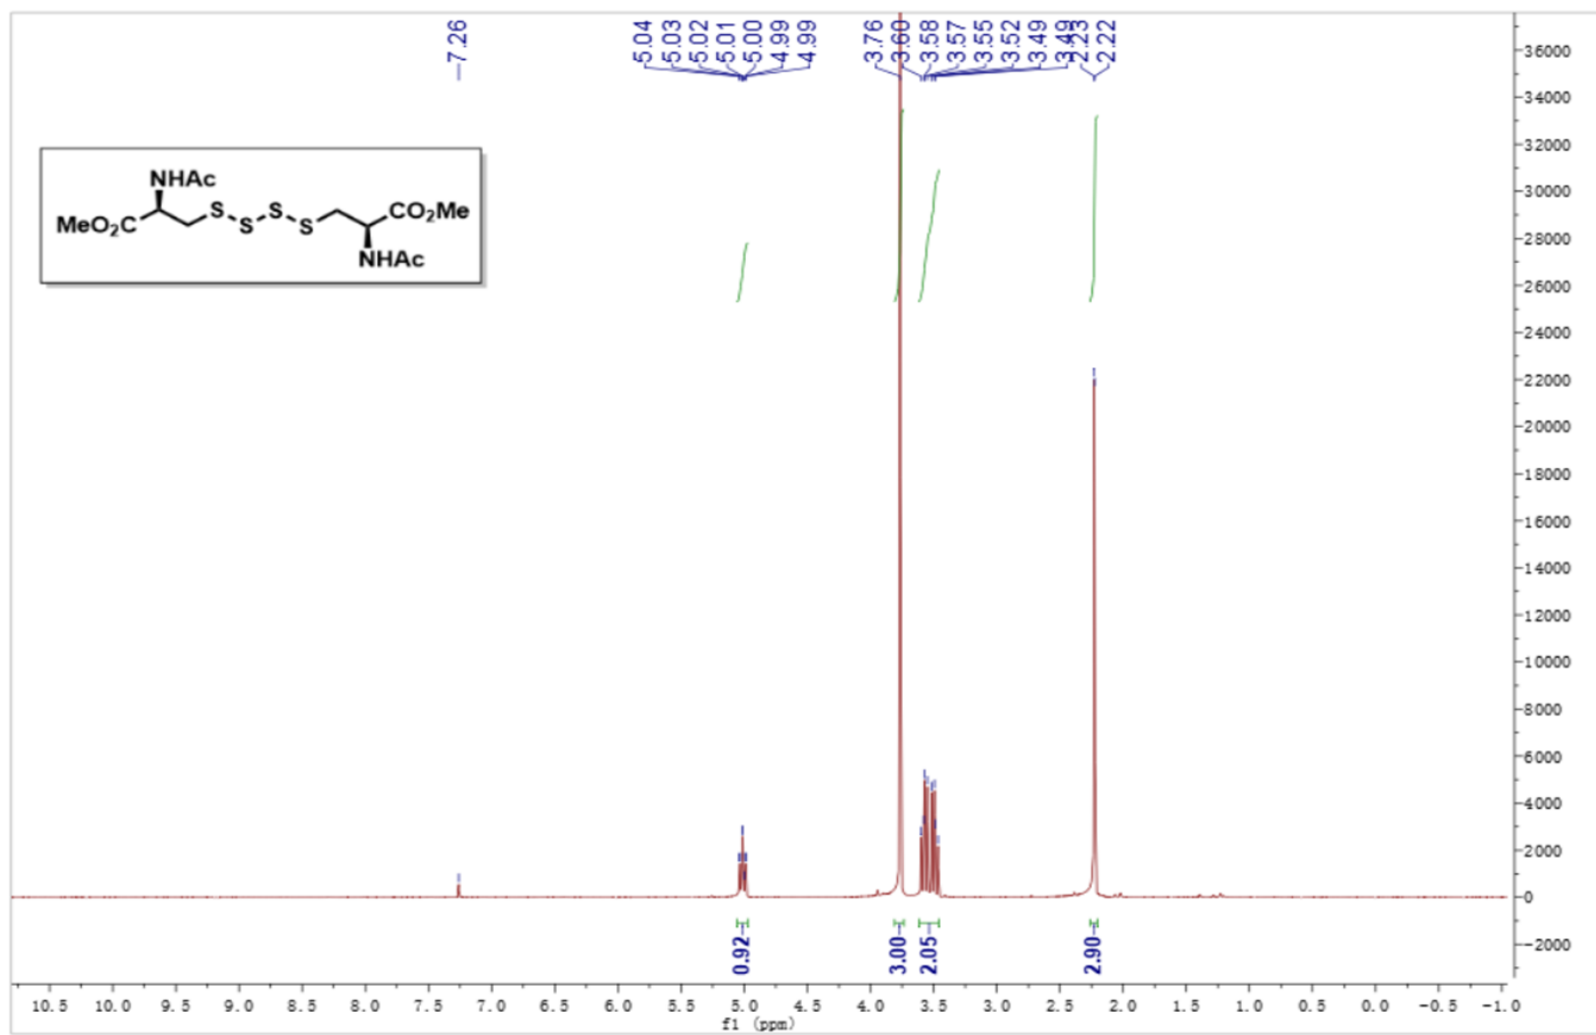

<sup>13</sup>C NMR of 2o

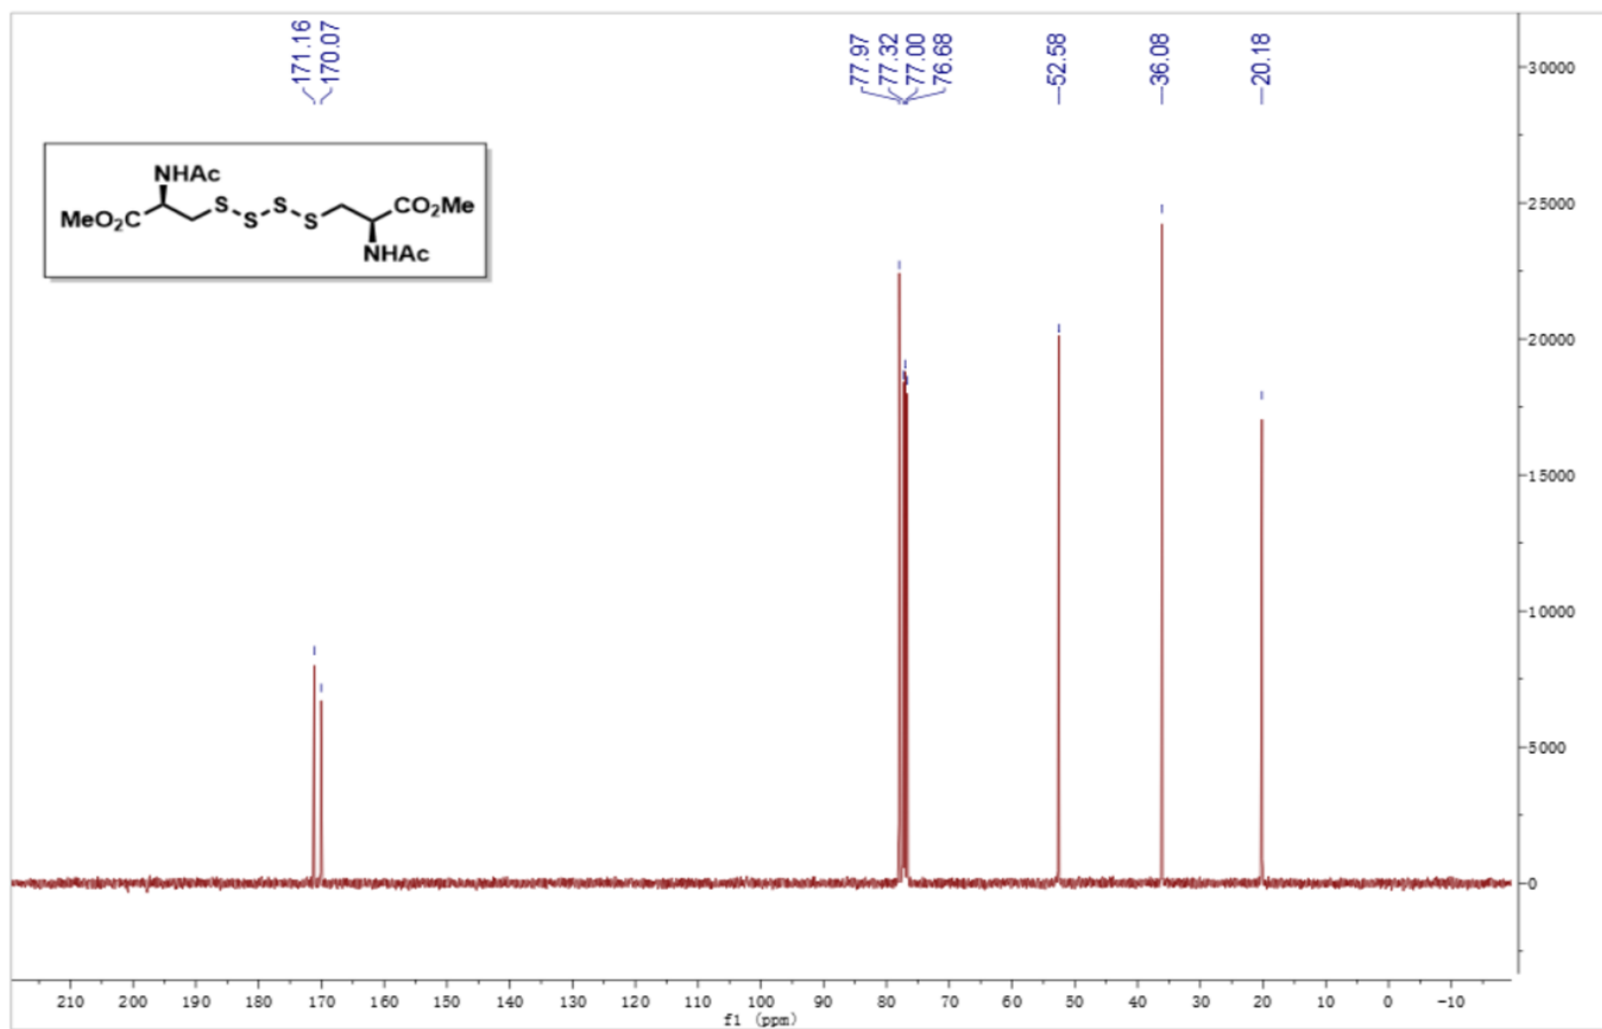

<sup>1</sup>H NMR of 2p

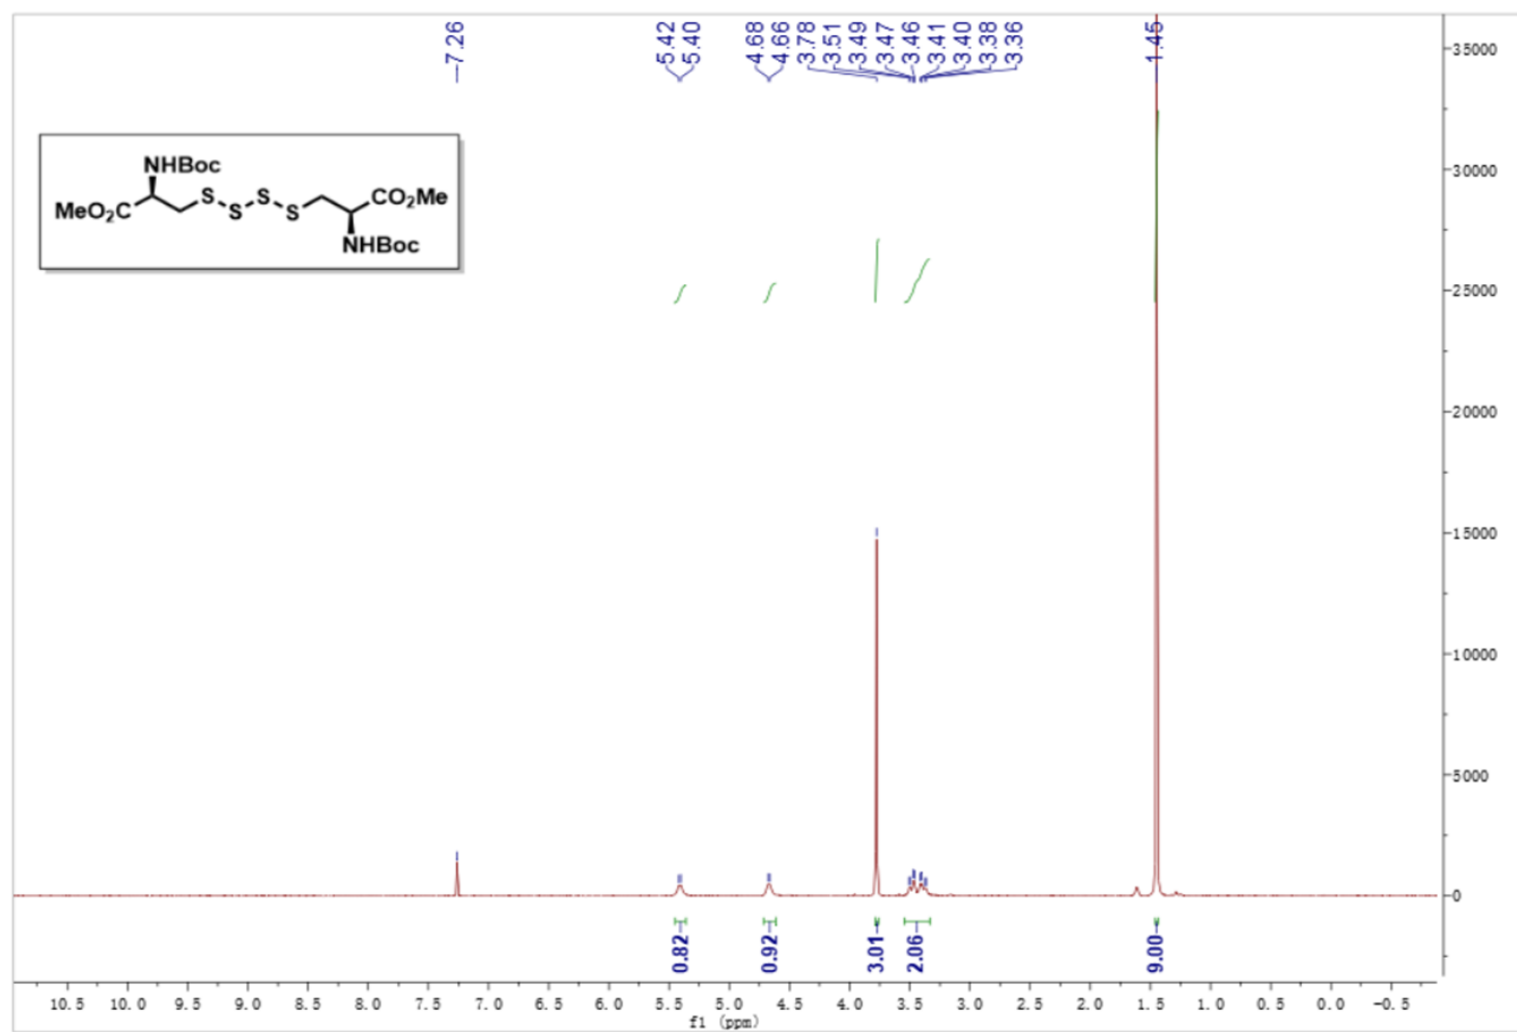

<sup>13</sup>C NMR of 2p

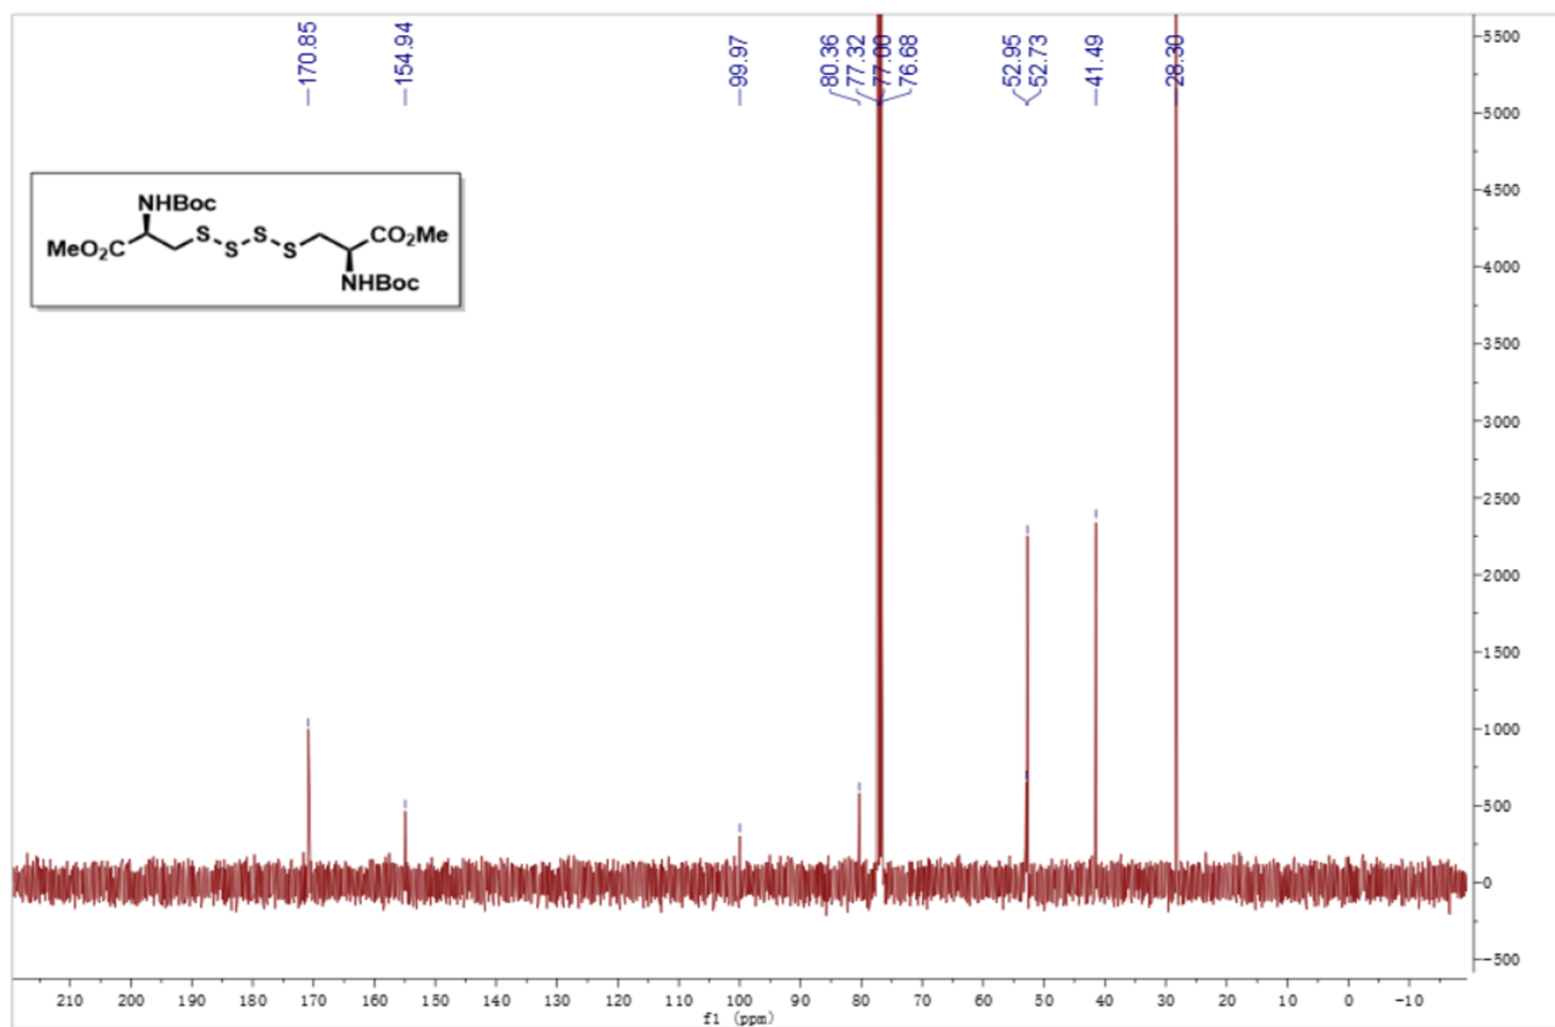

# <sup>1</sup>H NMR of 2q

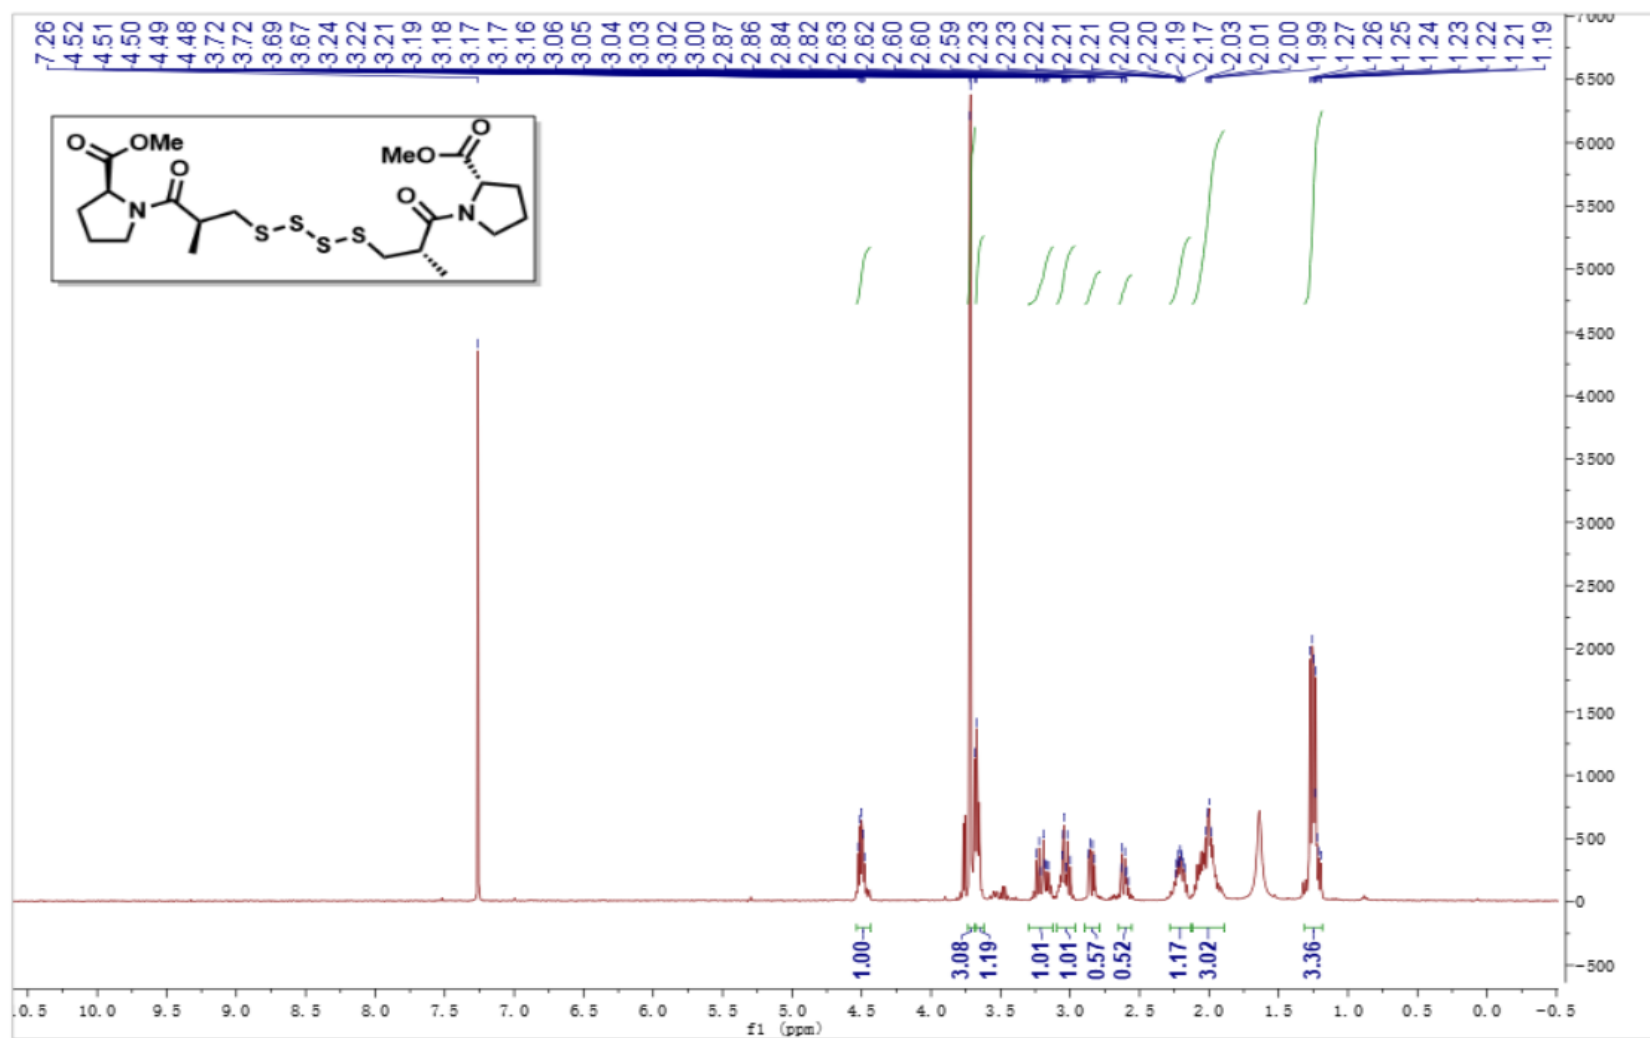

<sup>13</sup>C NMR of 2q

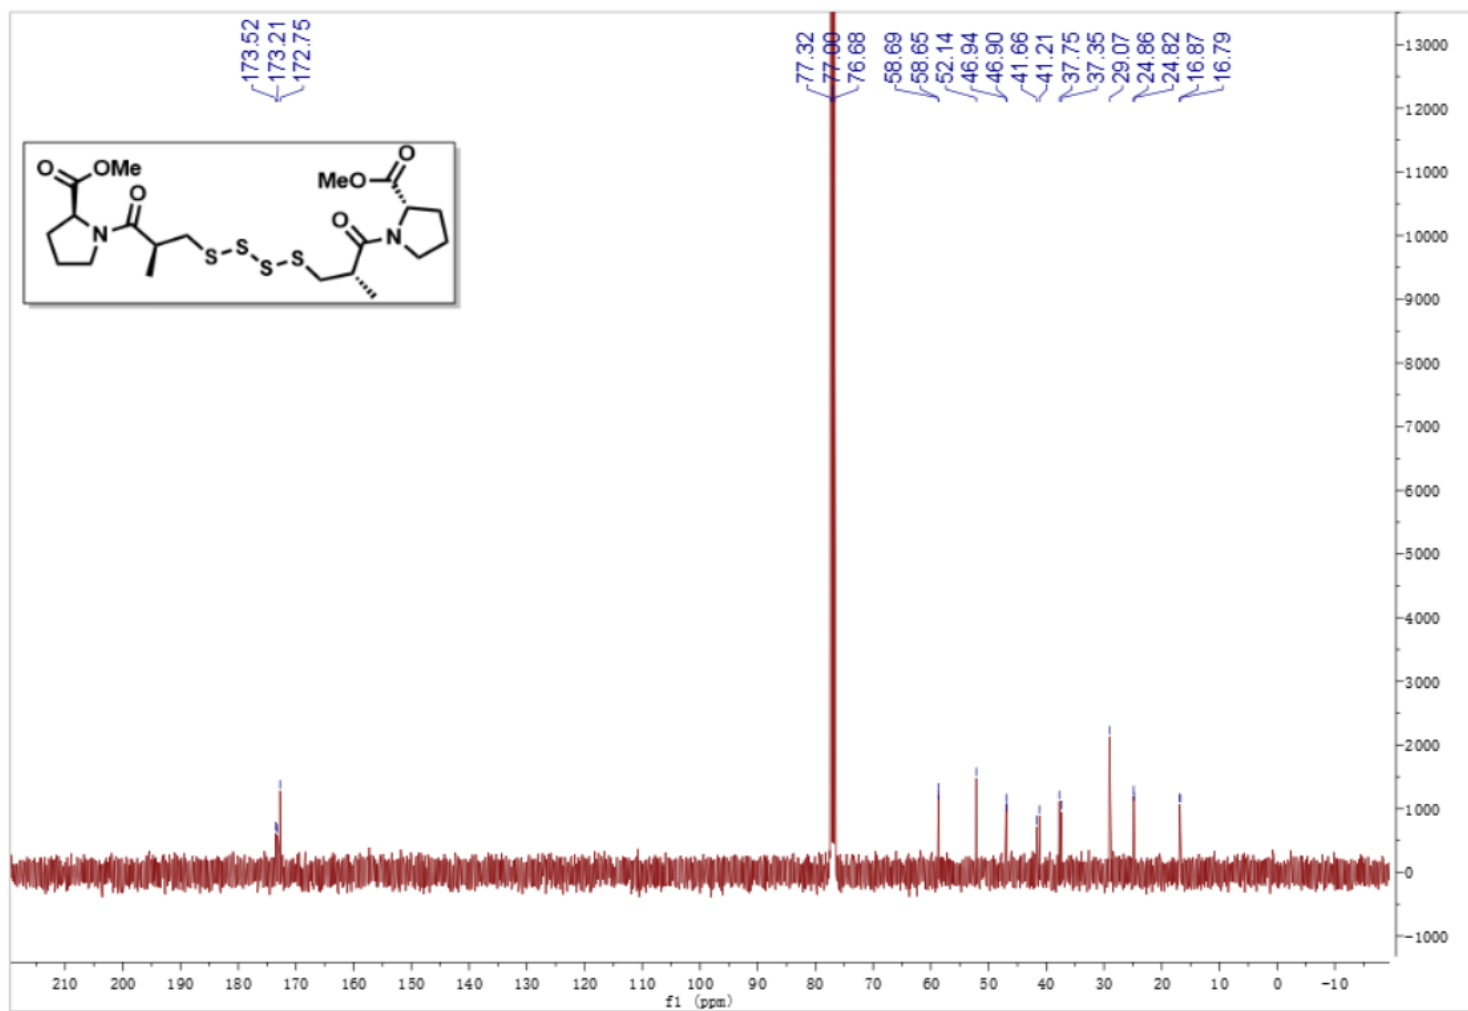



<sup>1</sup>H NMR of 3a

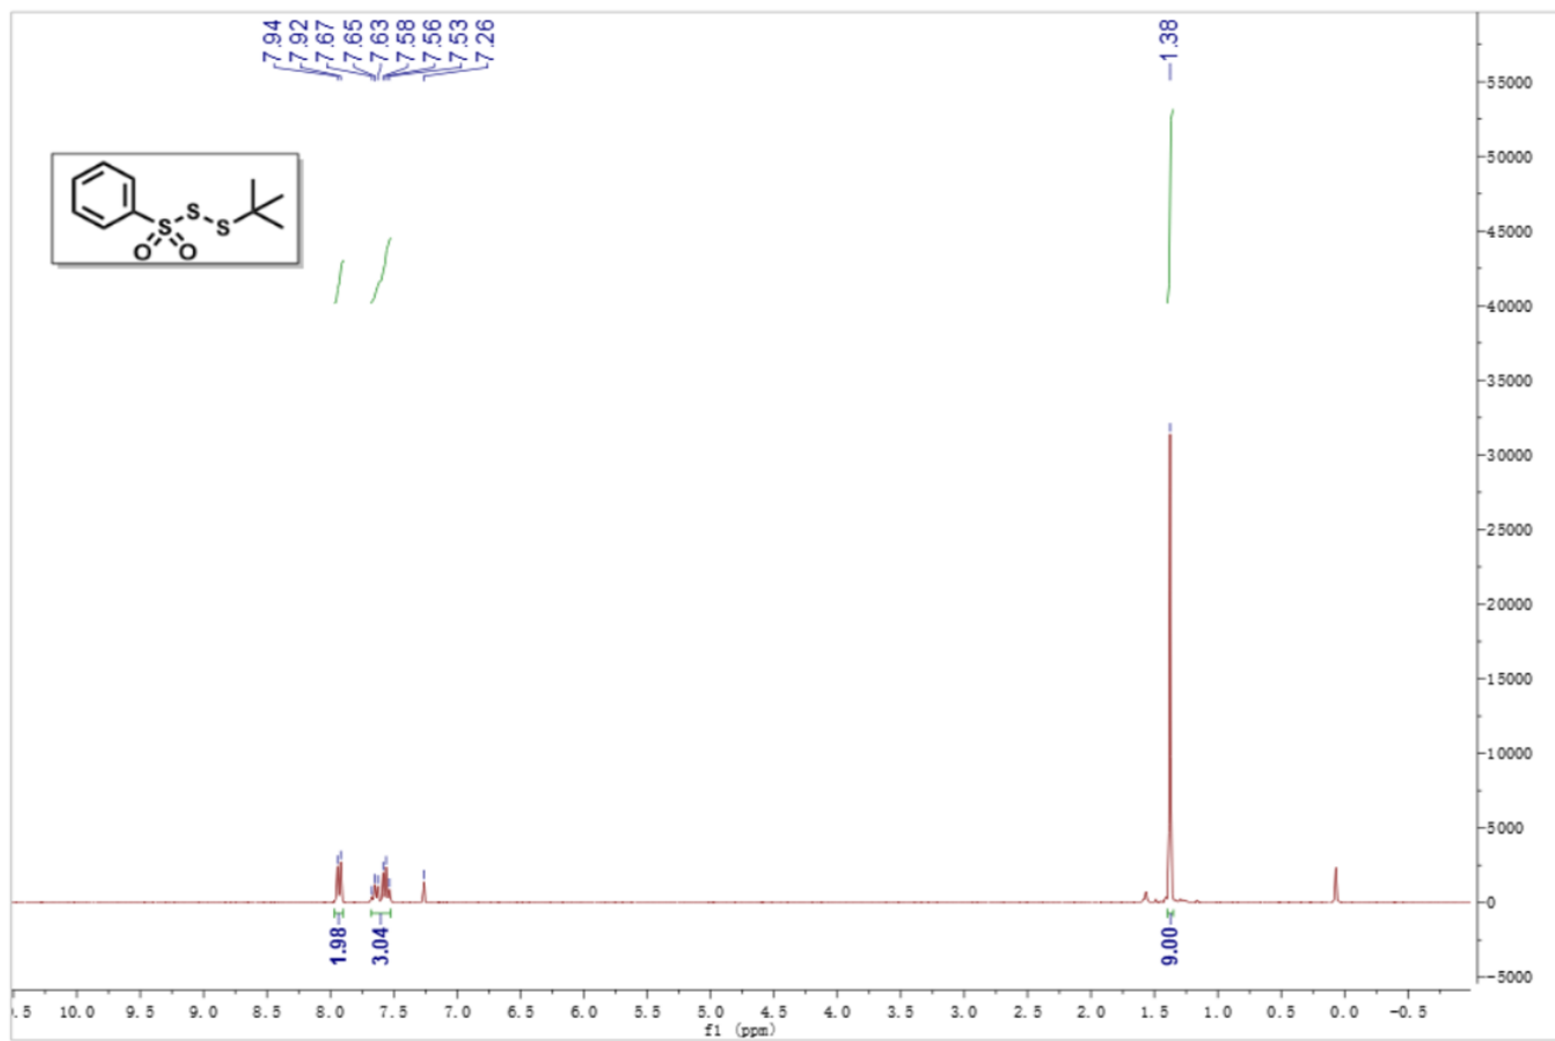

<sup>13</sup>C NMR of 3a

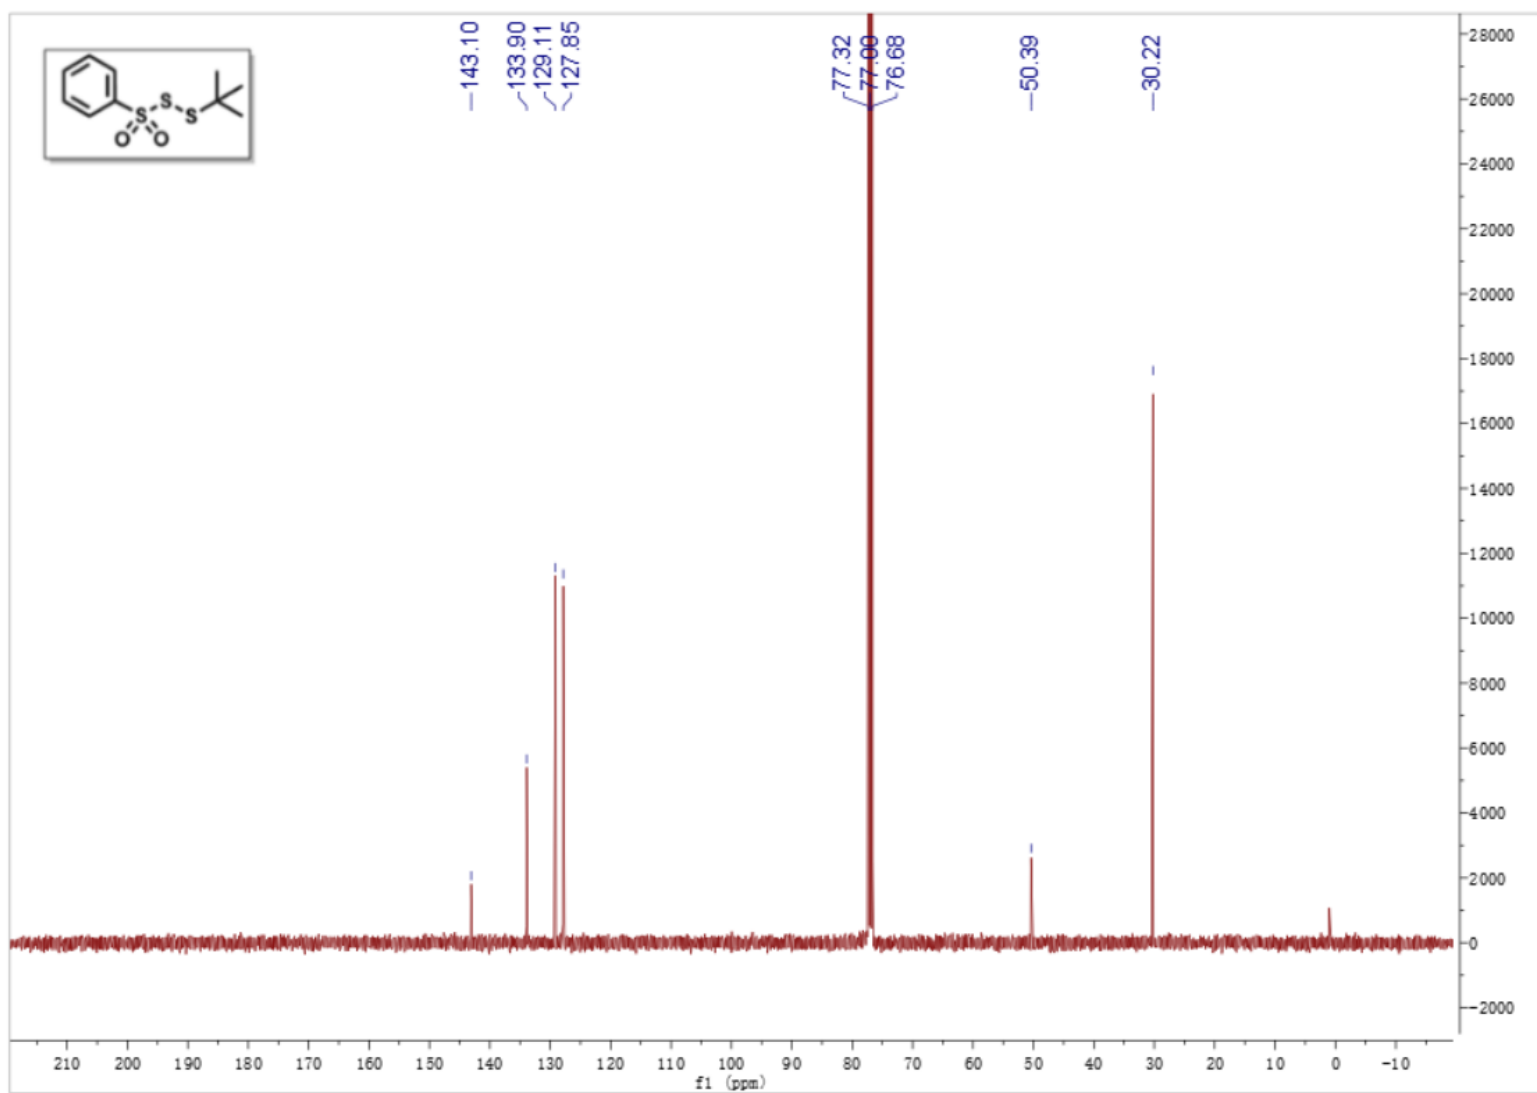

<sup>1</sup>H NMR of 3b

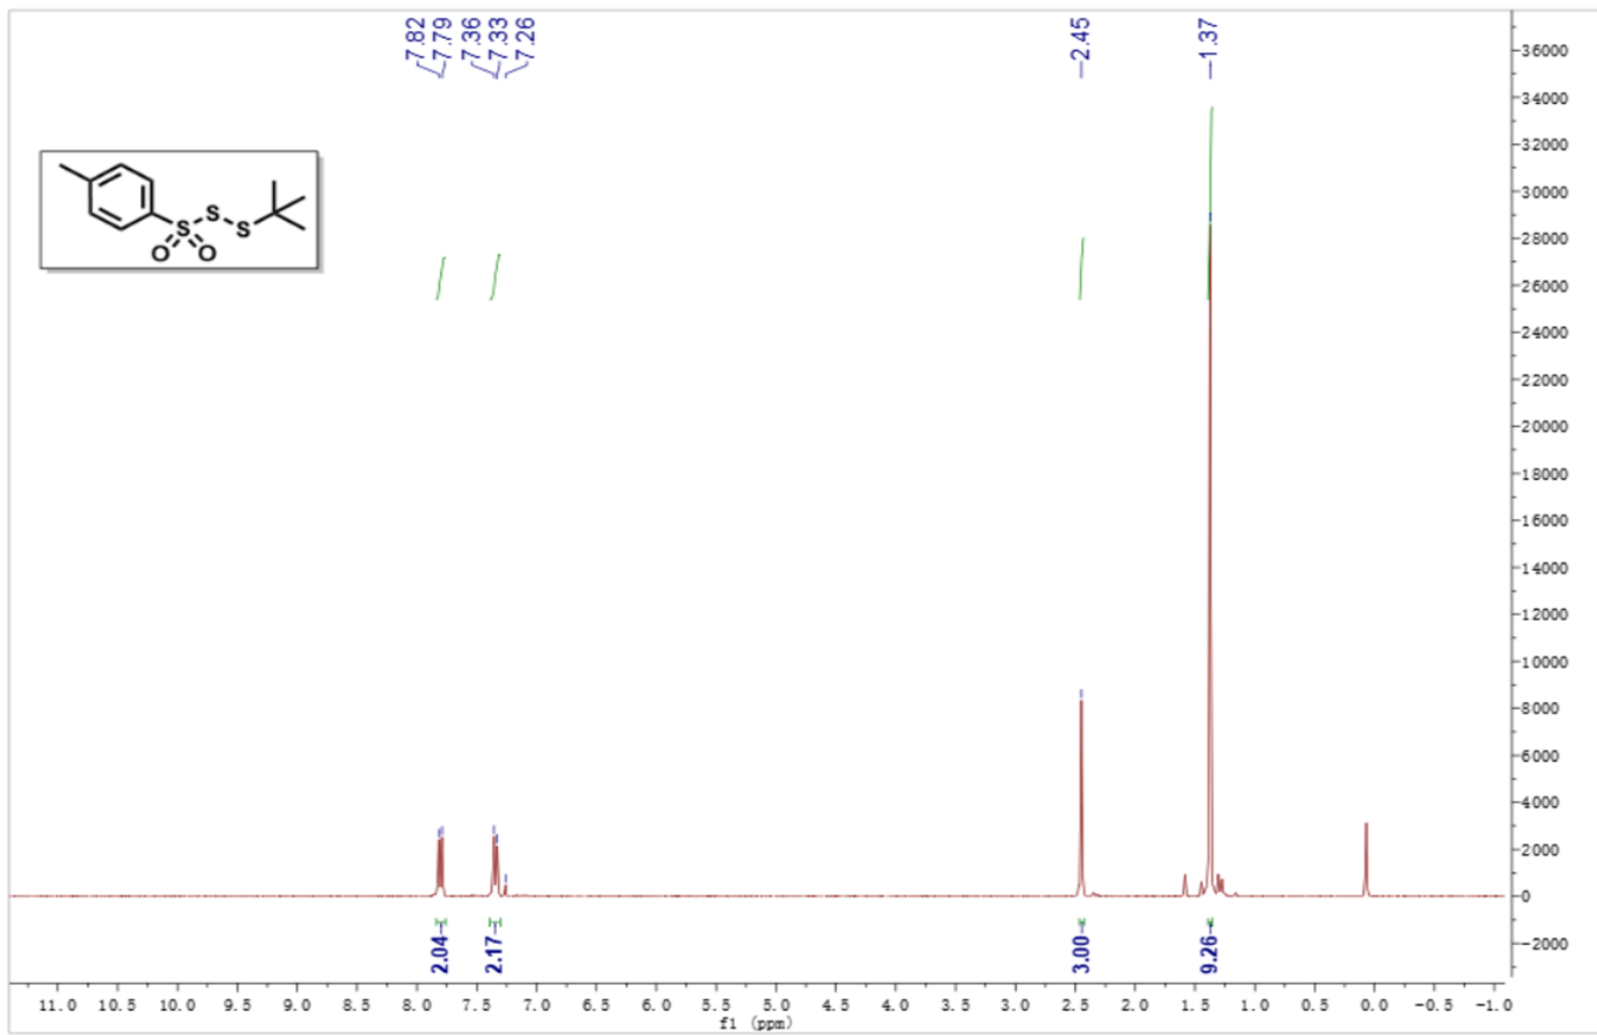

<sup>13</sup>C NMR of 3b

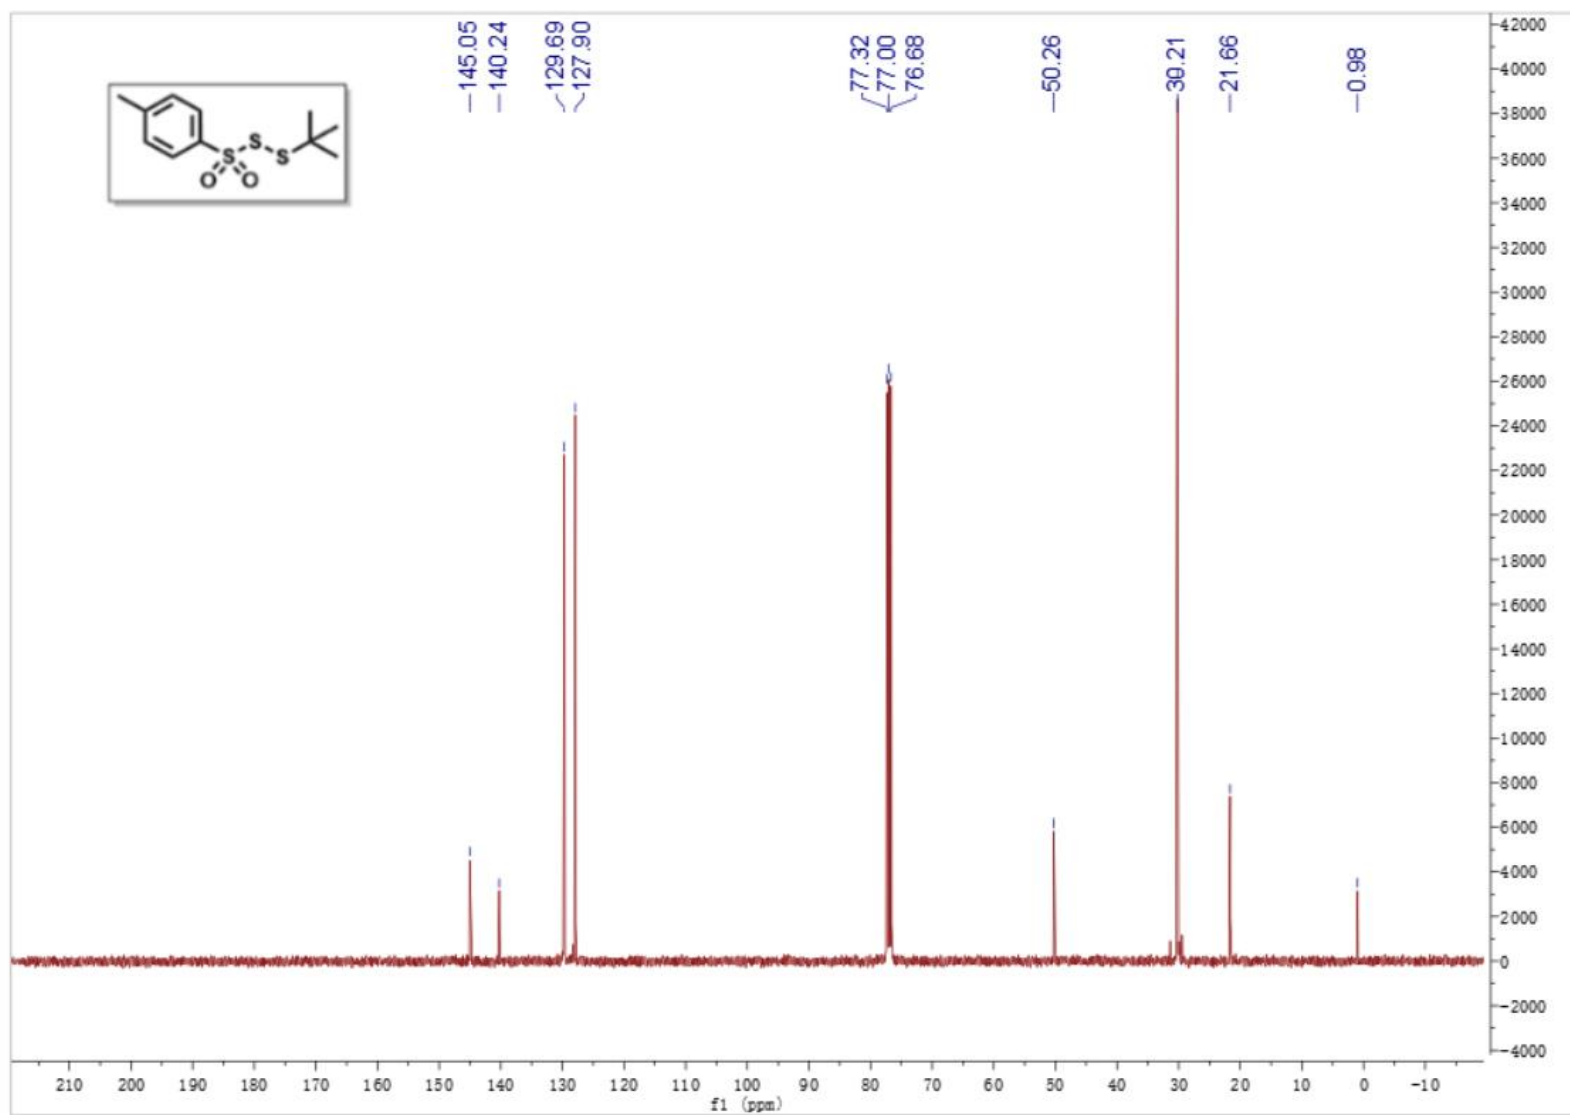

<sup>1</sup>H NMR of 3c

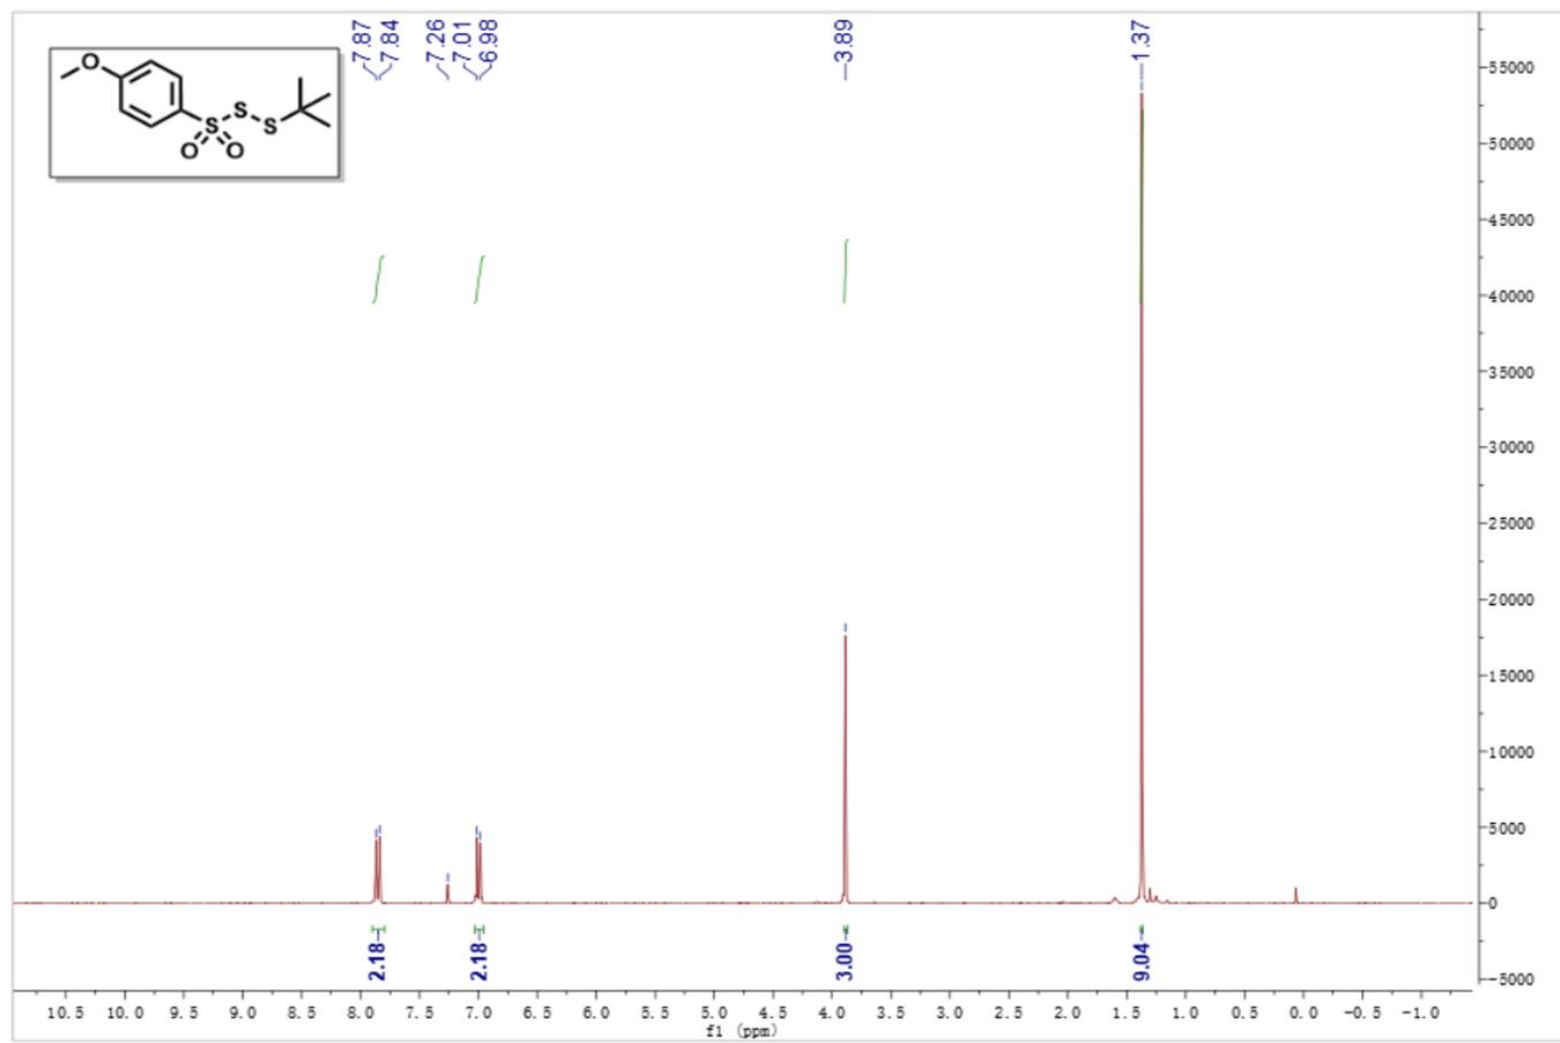

<sup>13</sup>C NMR of 3c

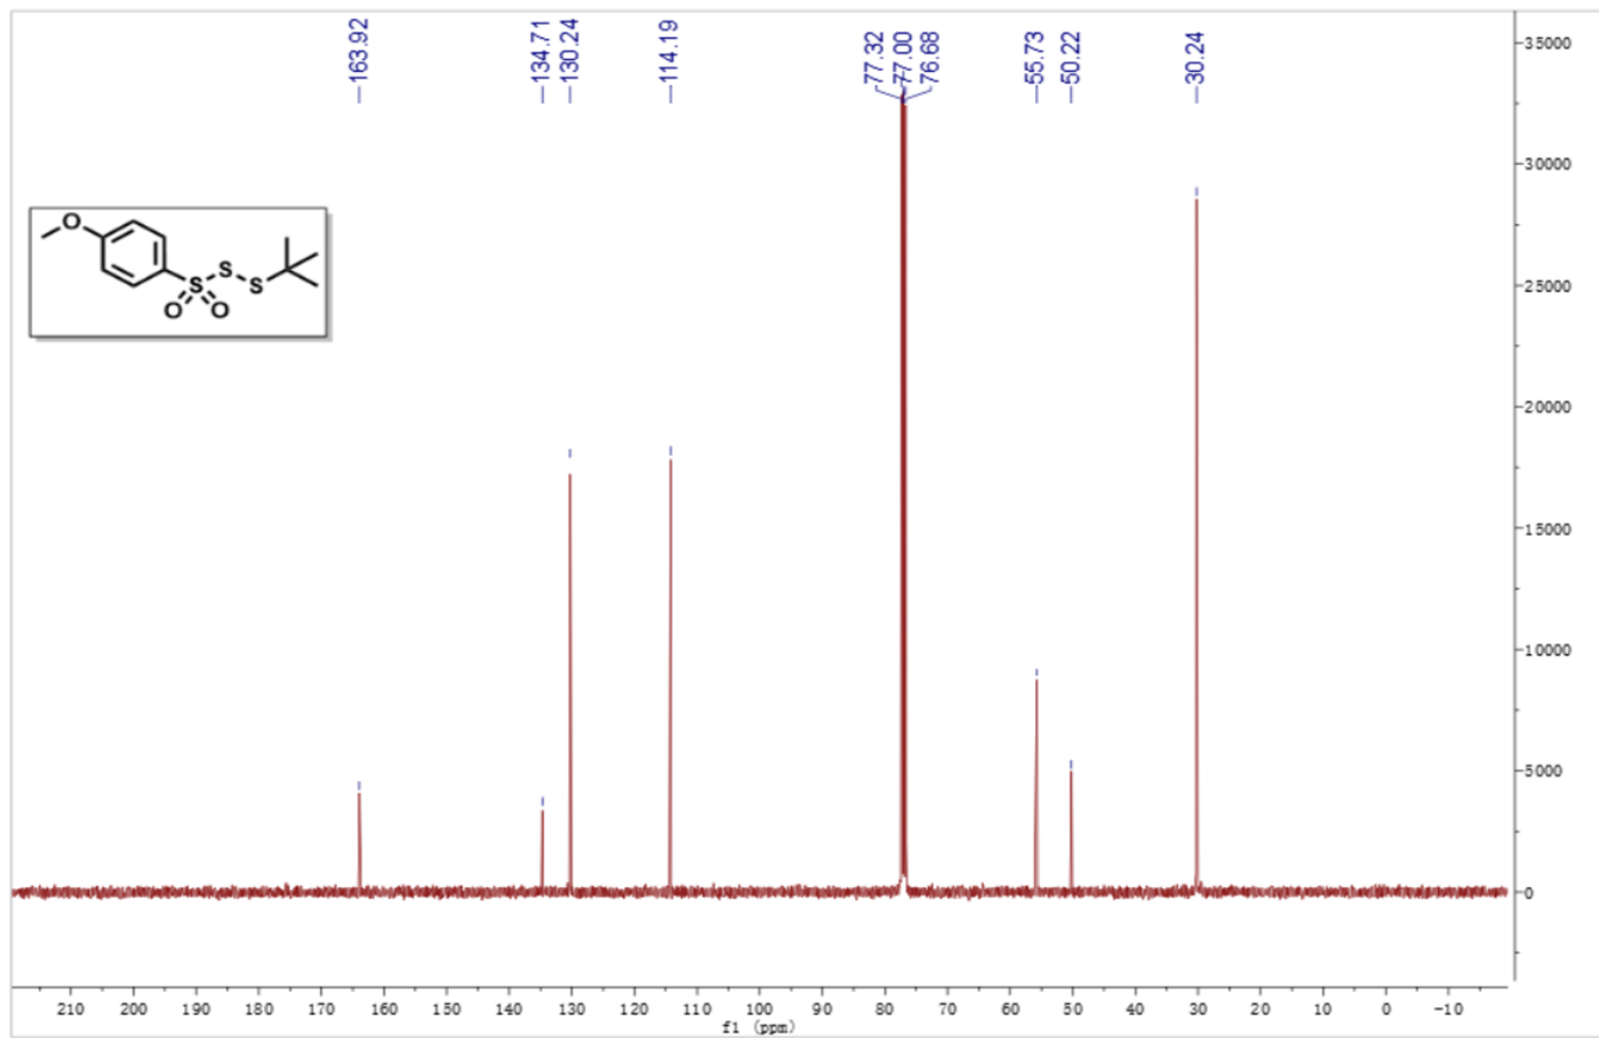

<sup>1</sup>H NMR of 3d

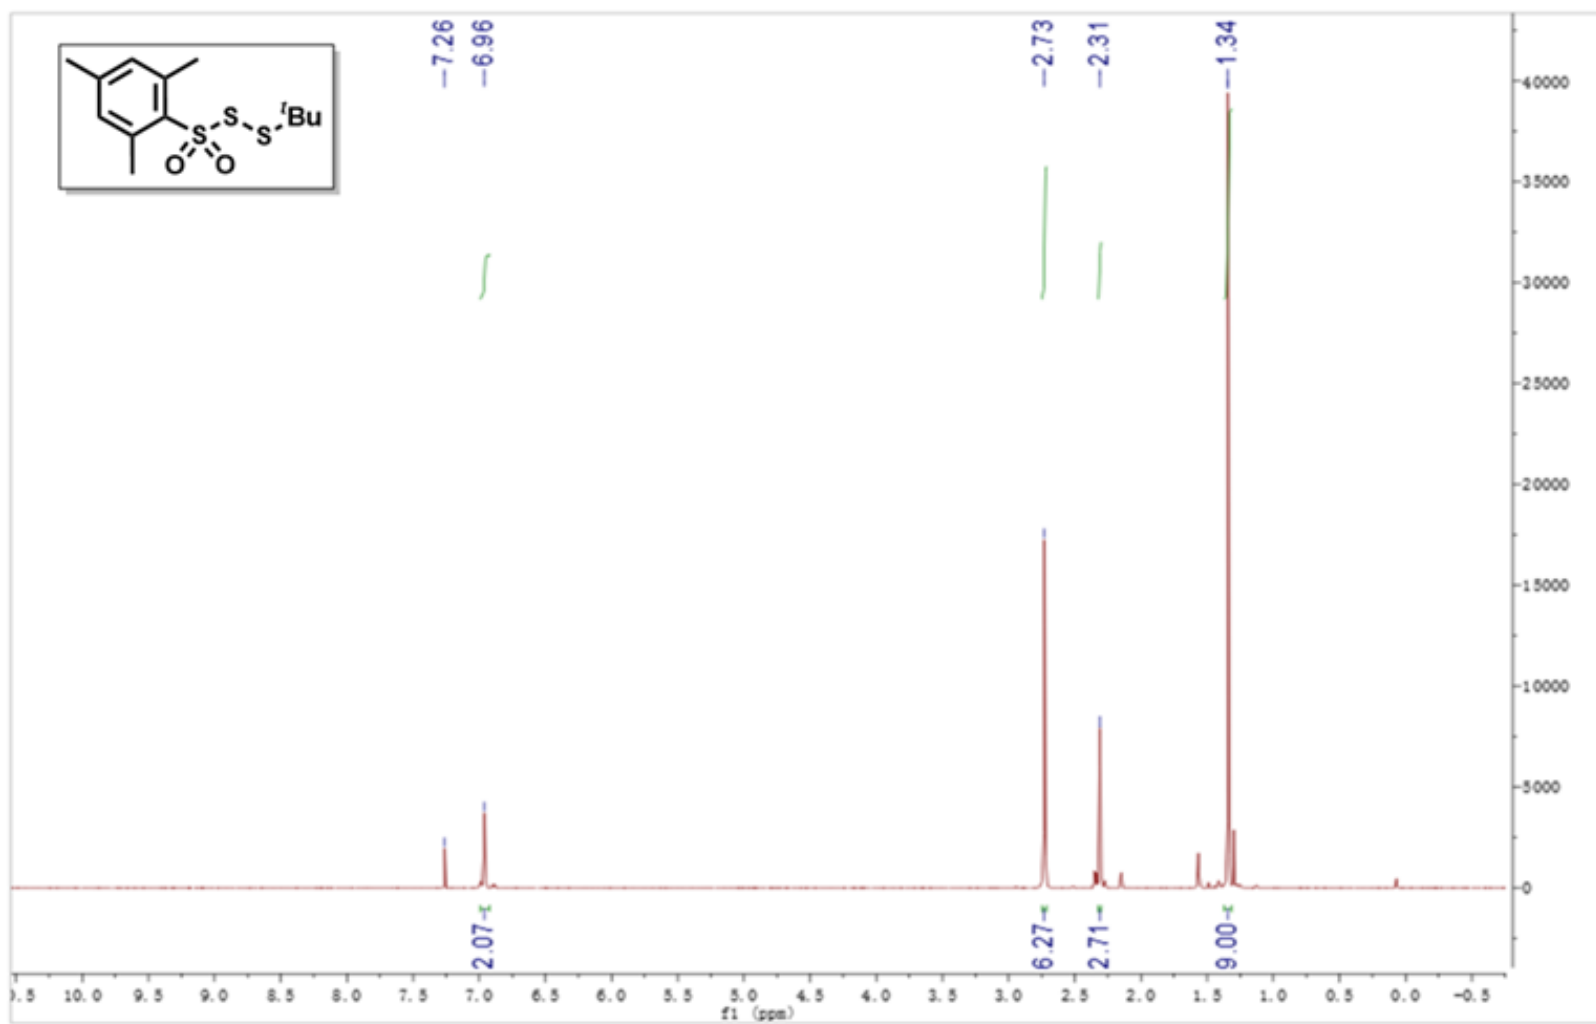

<sup>13</sup>C NMR of 3d

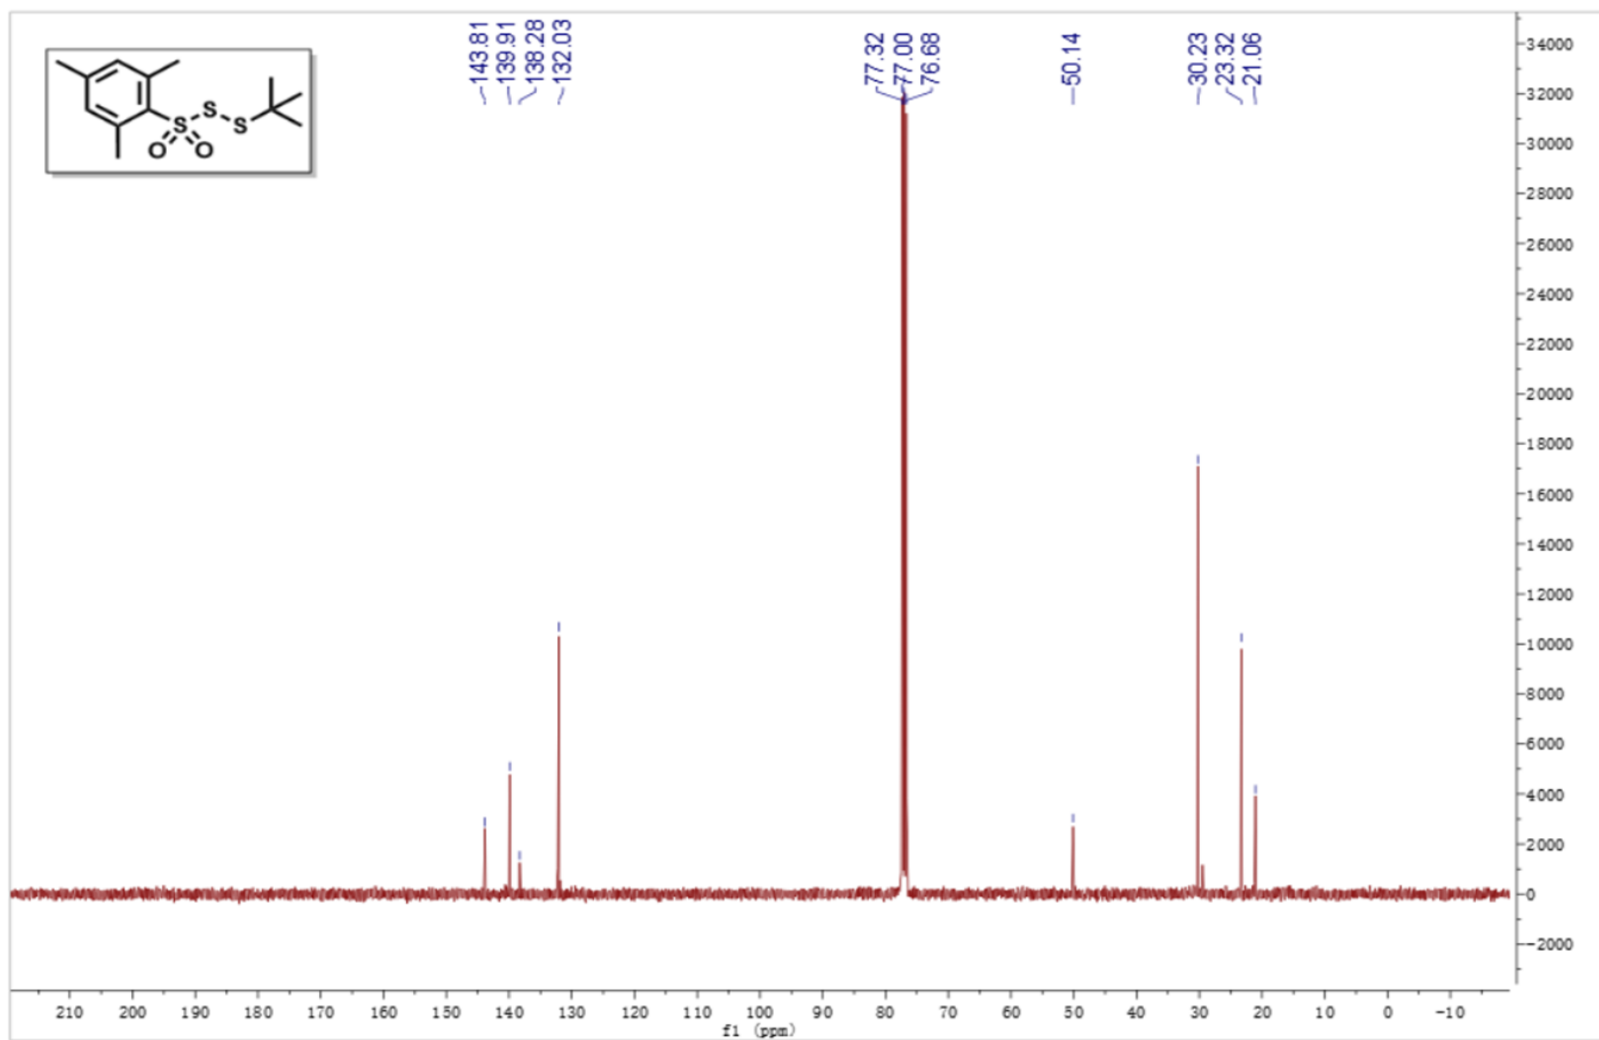



<sup>1</sup>H NMR of 3e

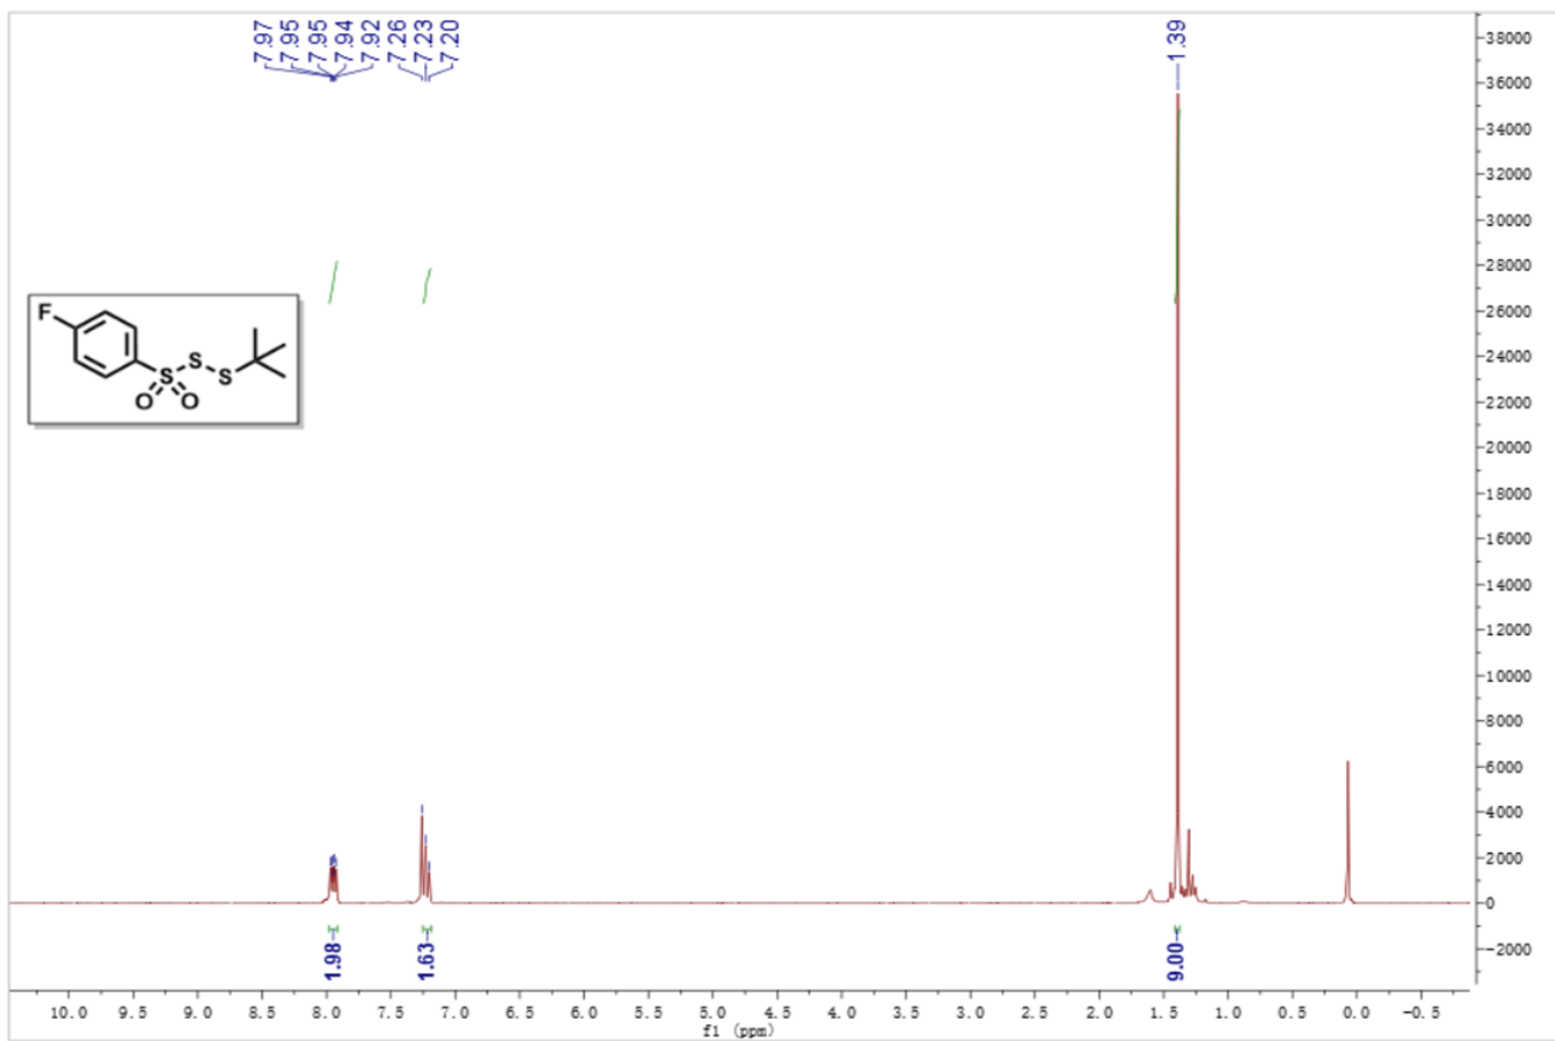

<sup>13</sup>C NMR of 3e

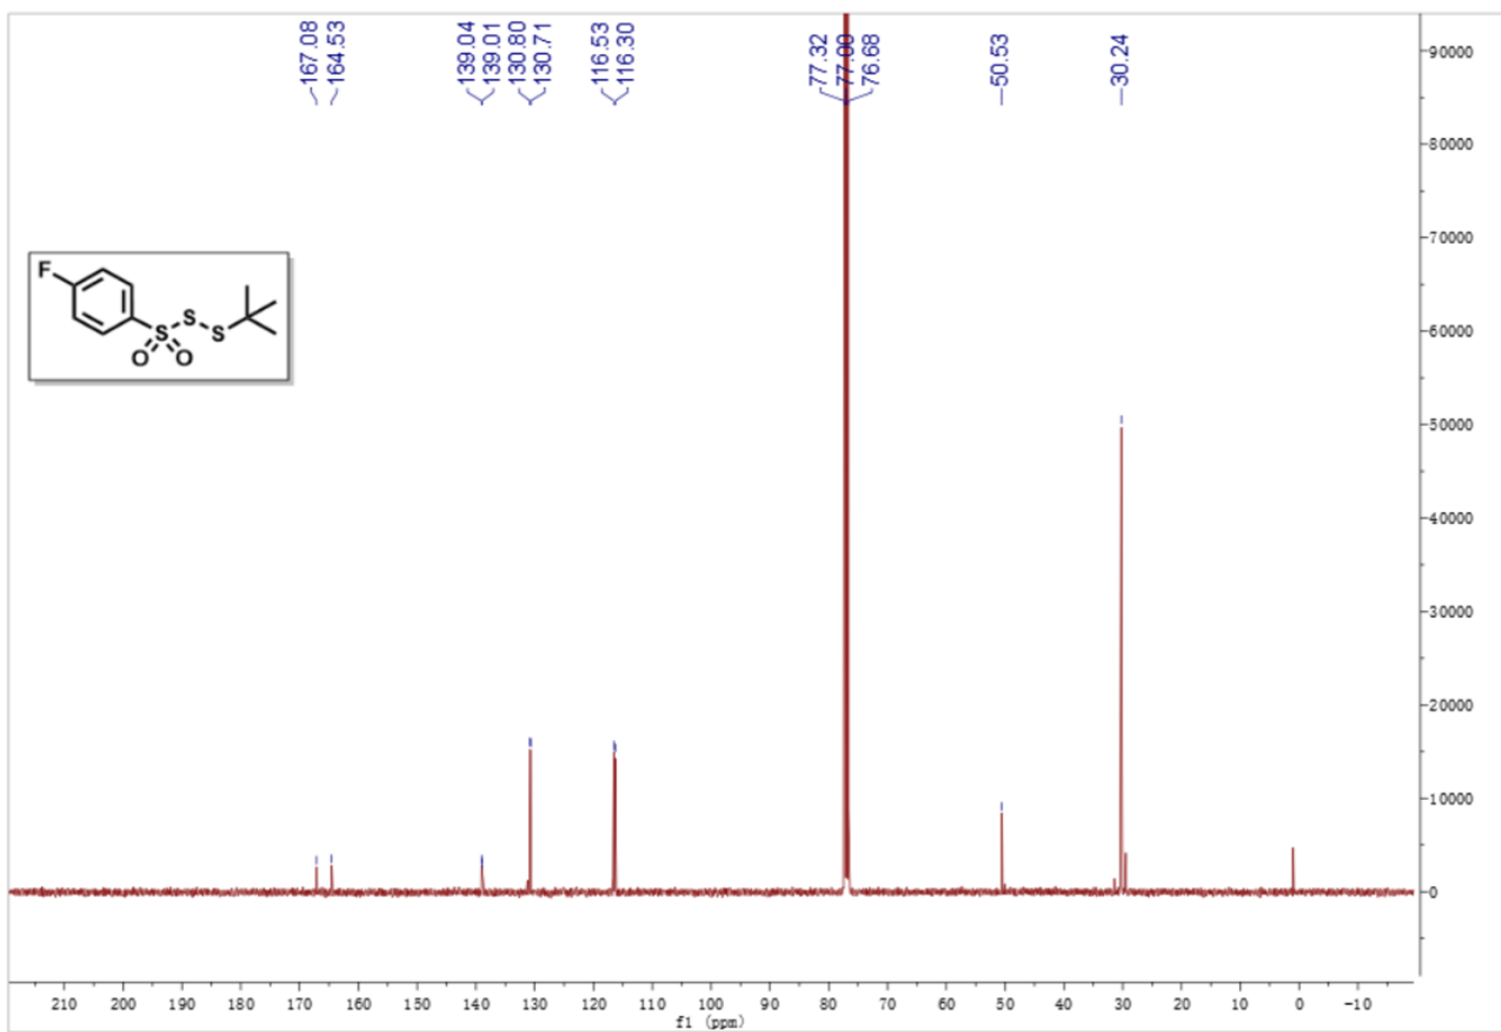

**$^{19}\text{F}$  NMR of 3e**

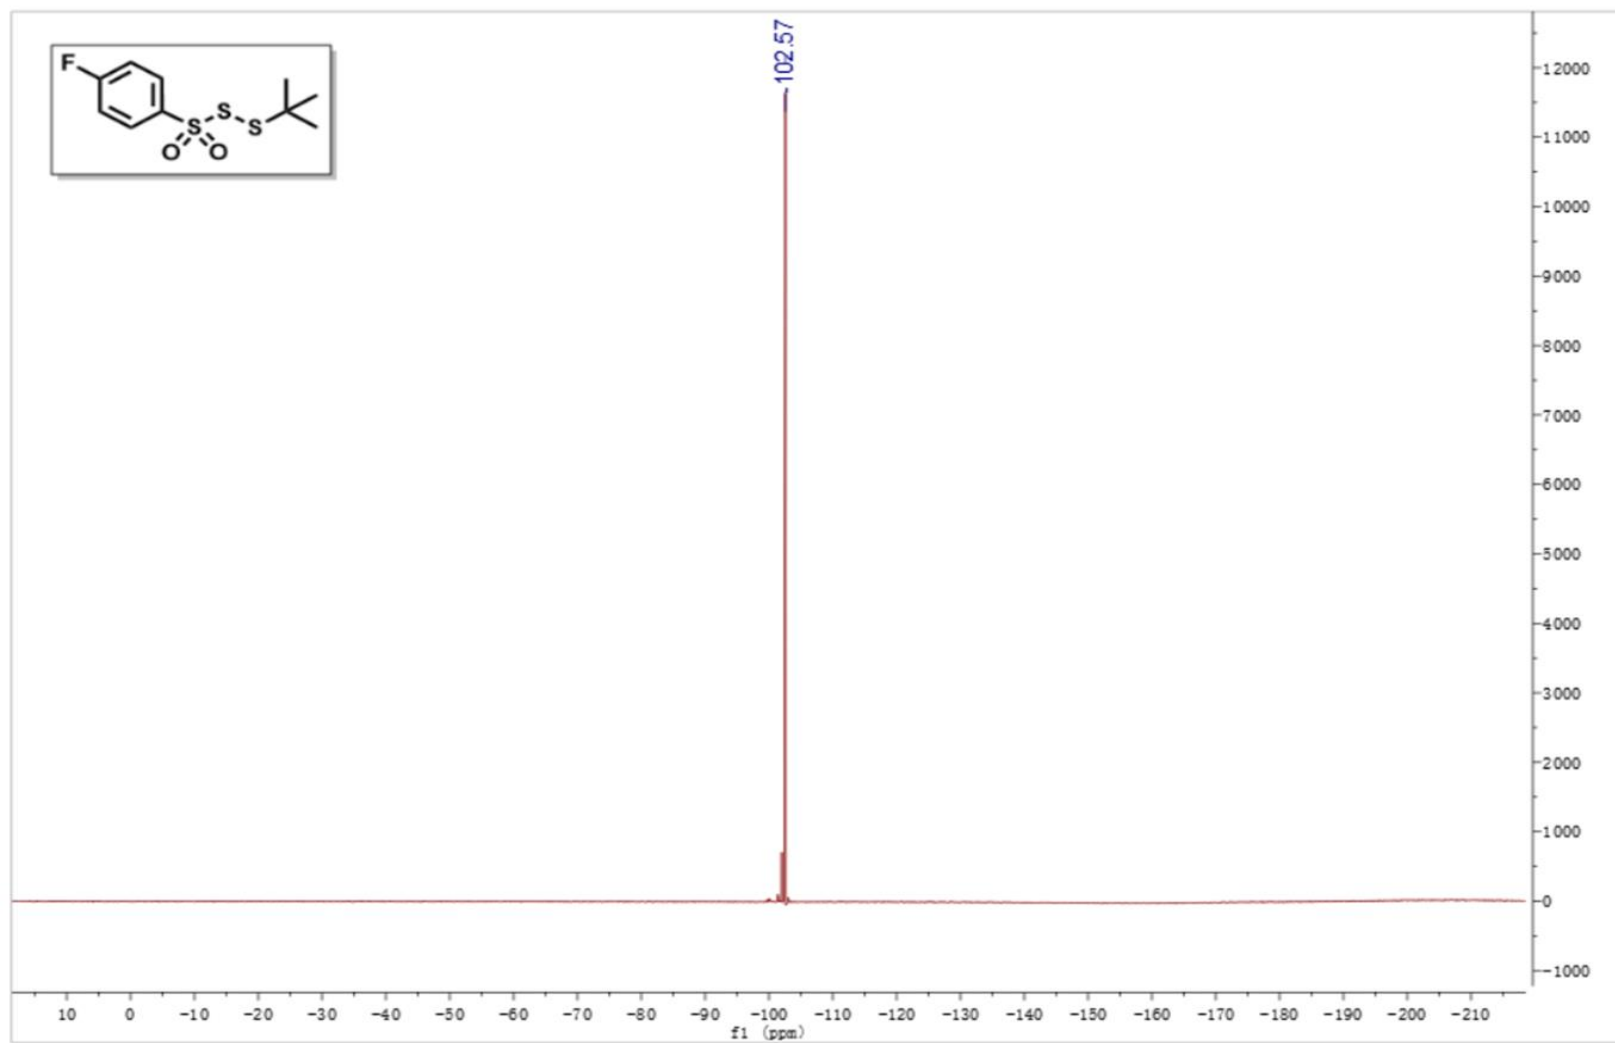

<sup>1</sup>H NMR of 3f

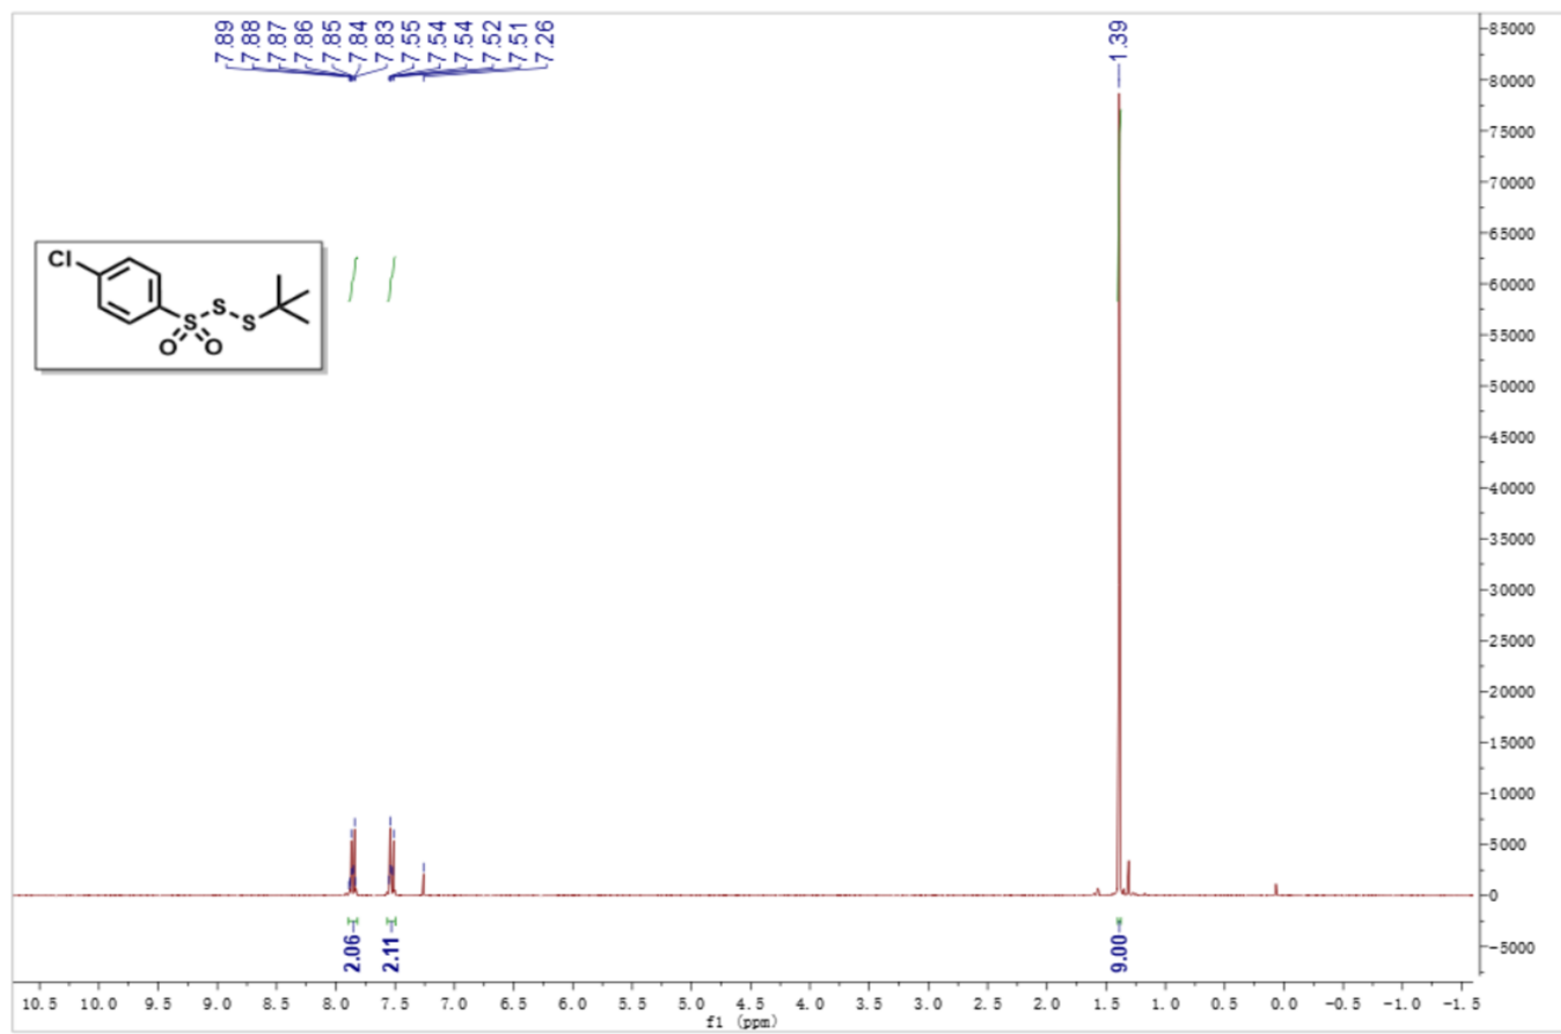

<sup>13</sup>C NMR of 3f

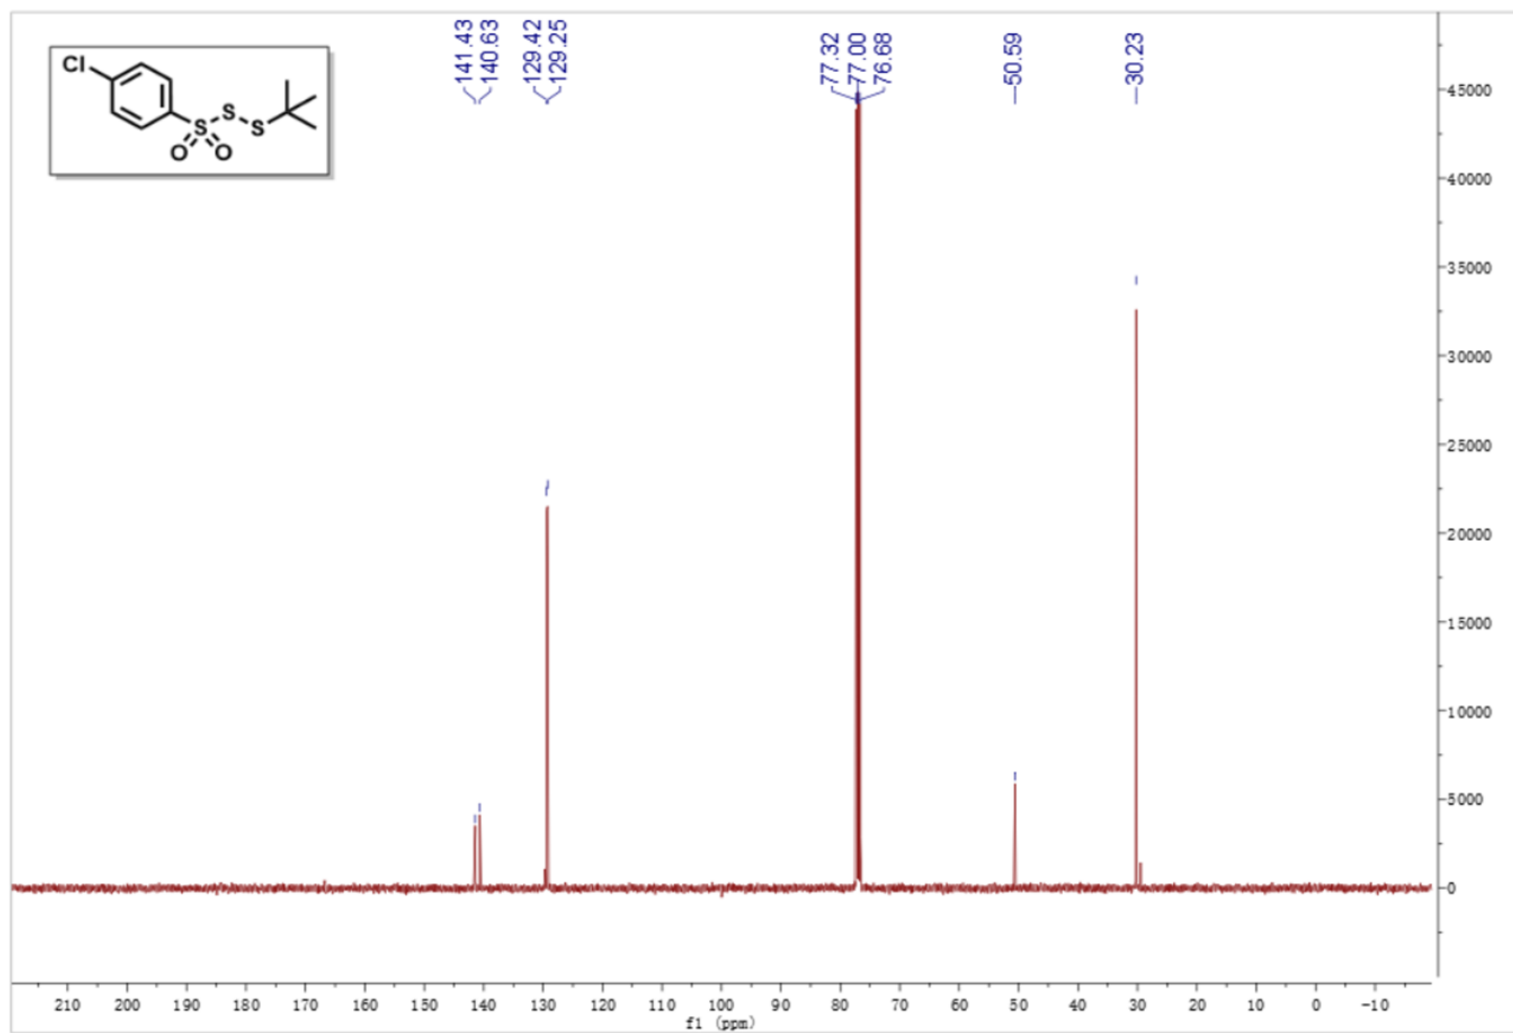

<sup>1</sup>H NMR of 3g

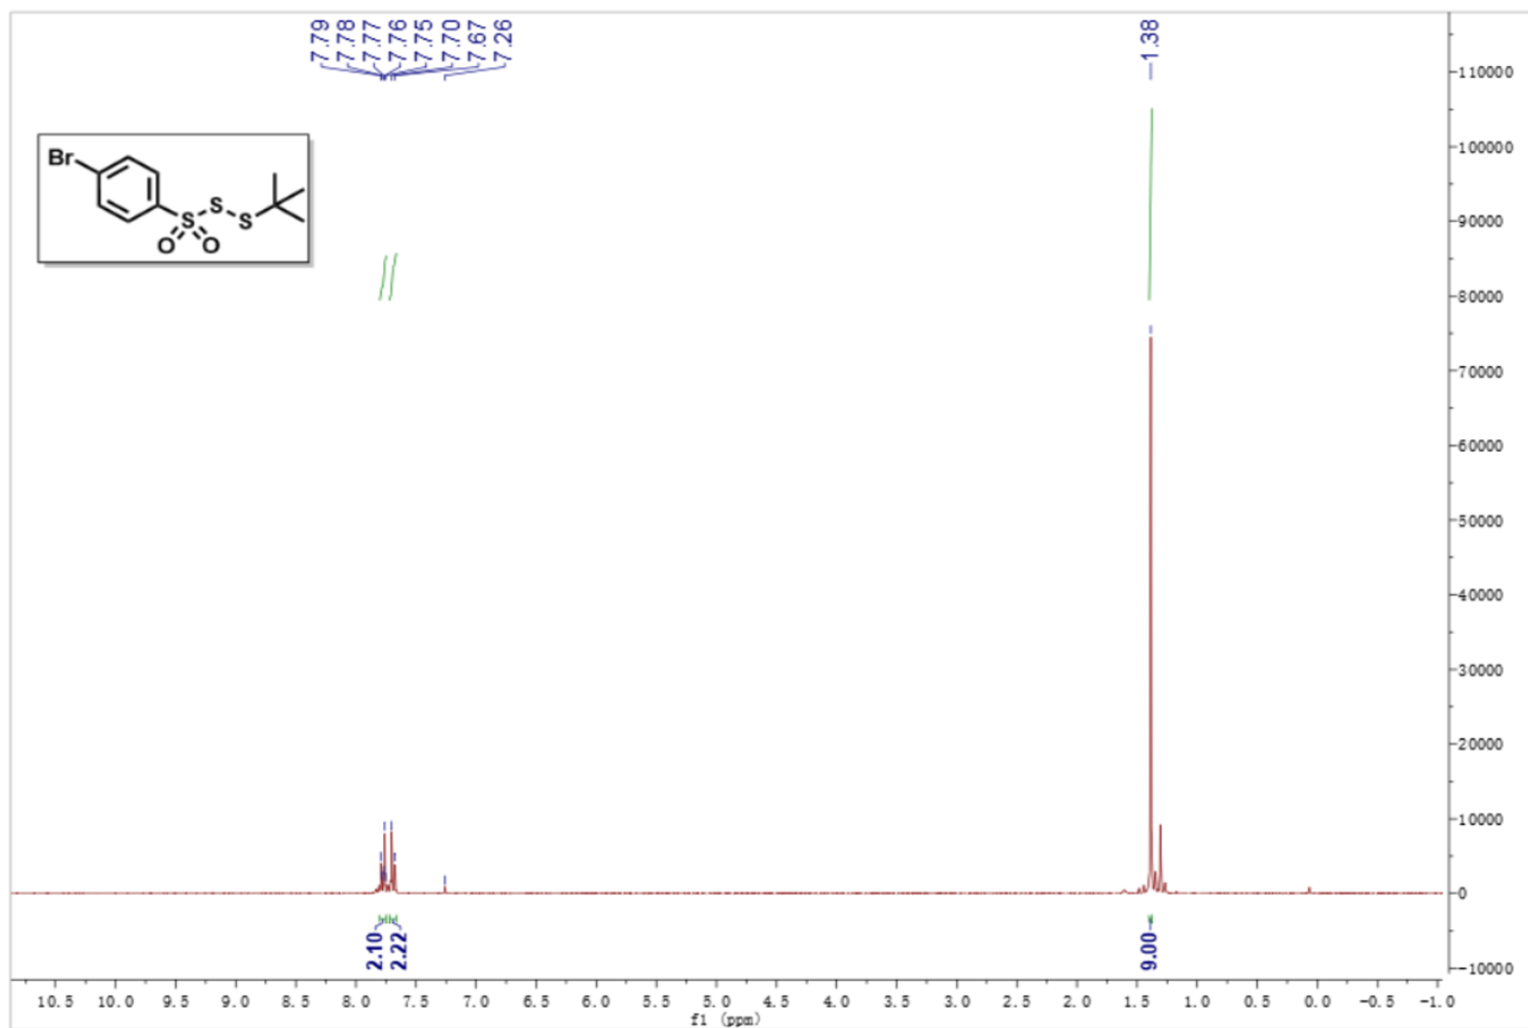

<sup>13</sup>C NMR of 3g

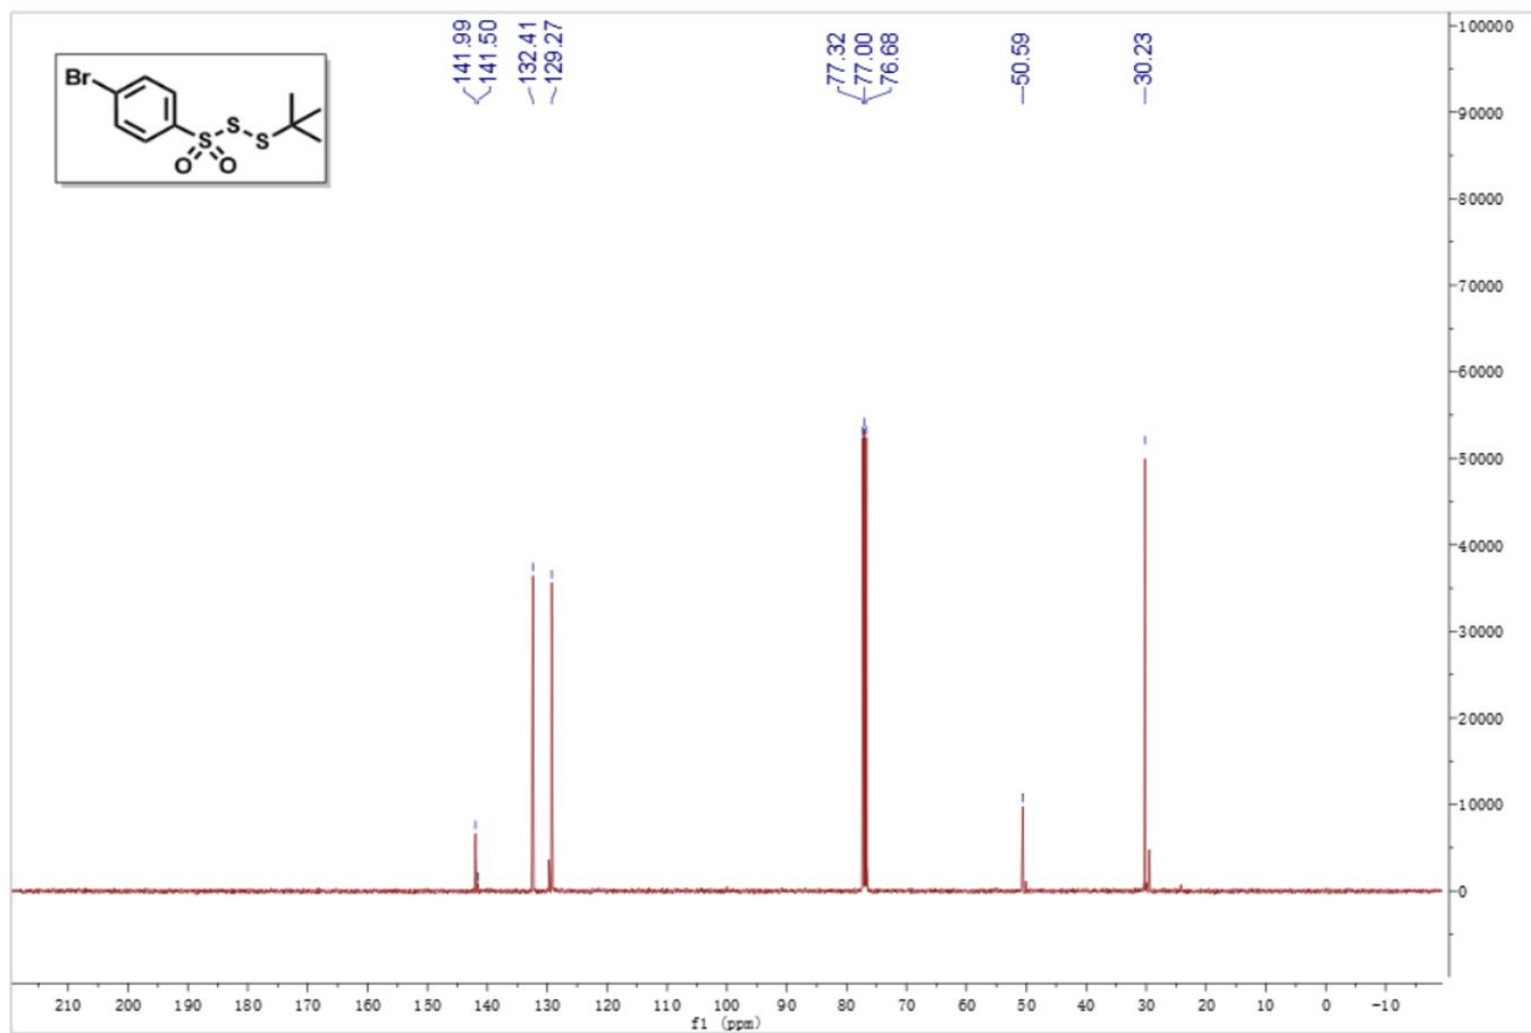

<sup>1</sup>H NMR of 3h

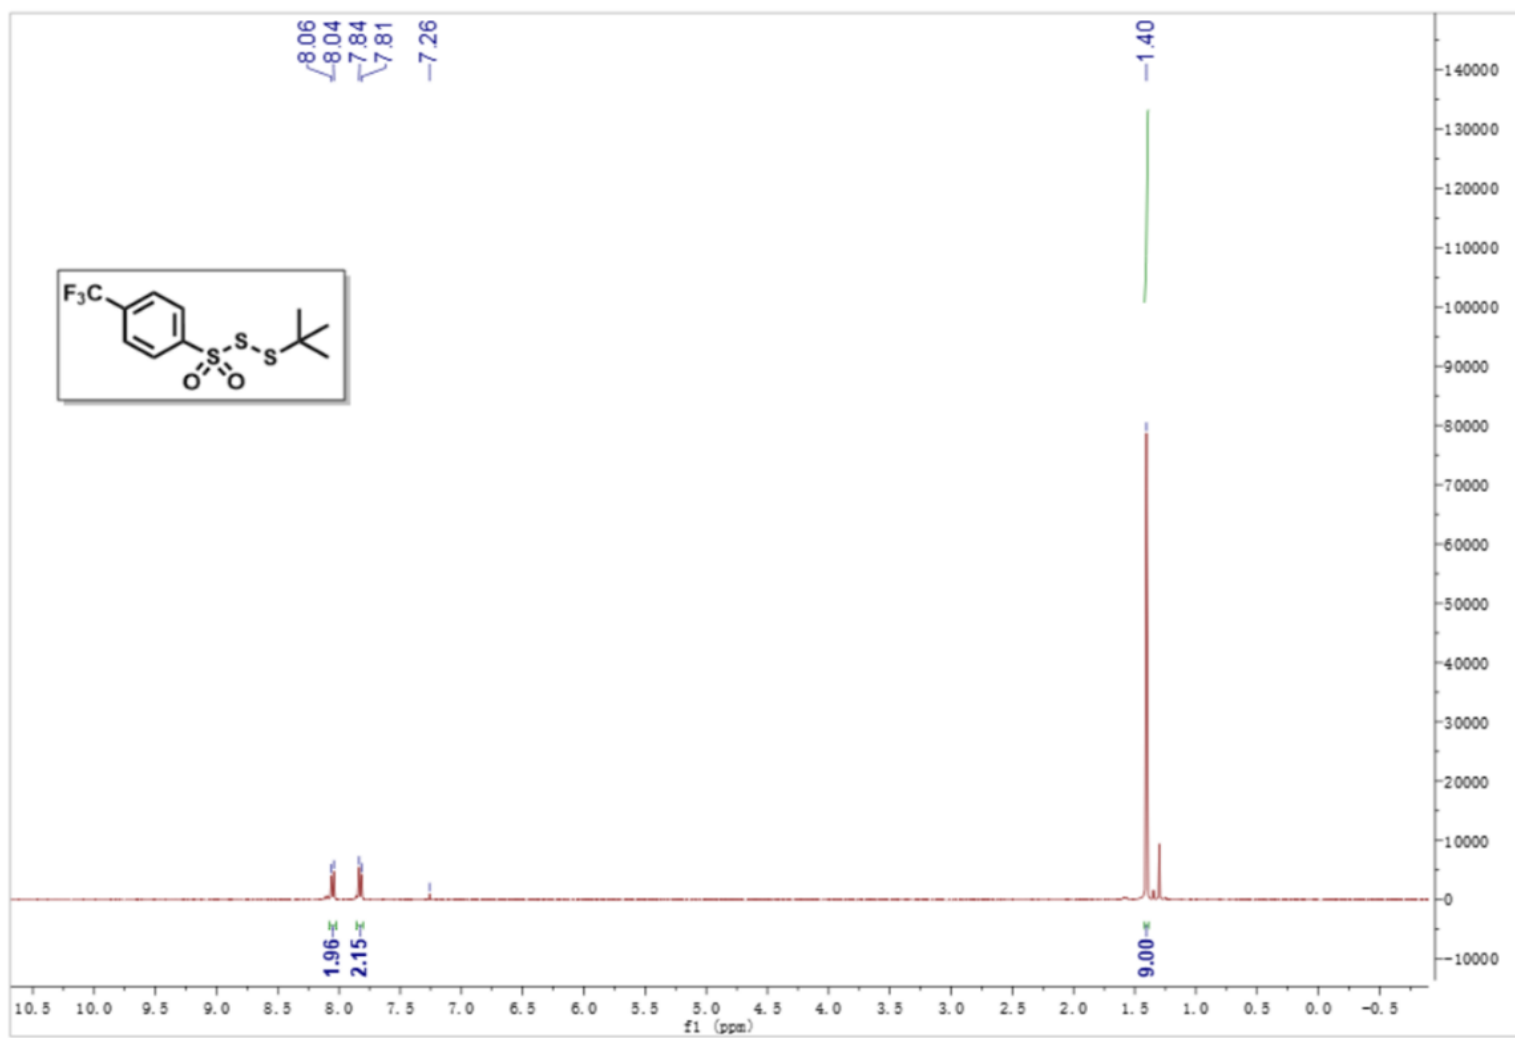



**<sup>13</sup>C NMR of 3h**

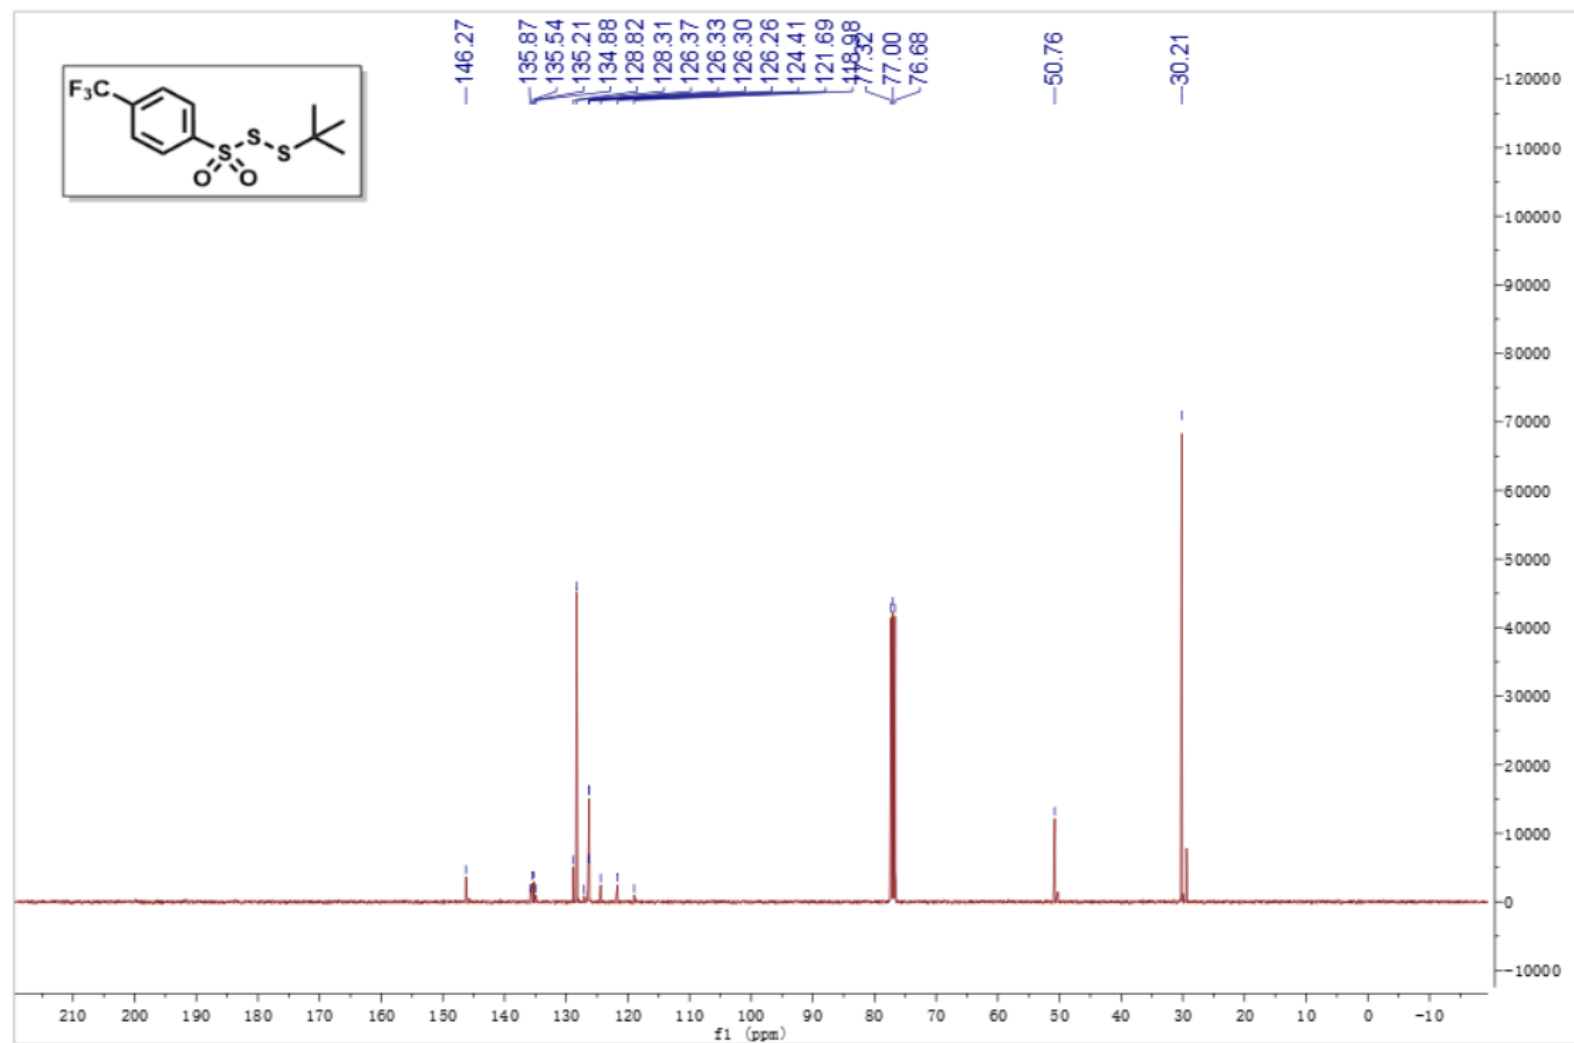

**$^{19}\text{F}$  NMR of 3h**

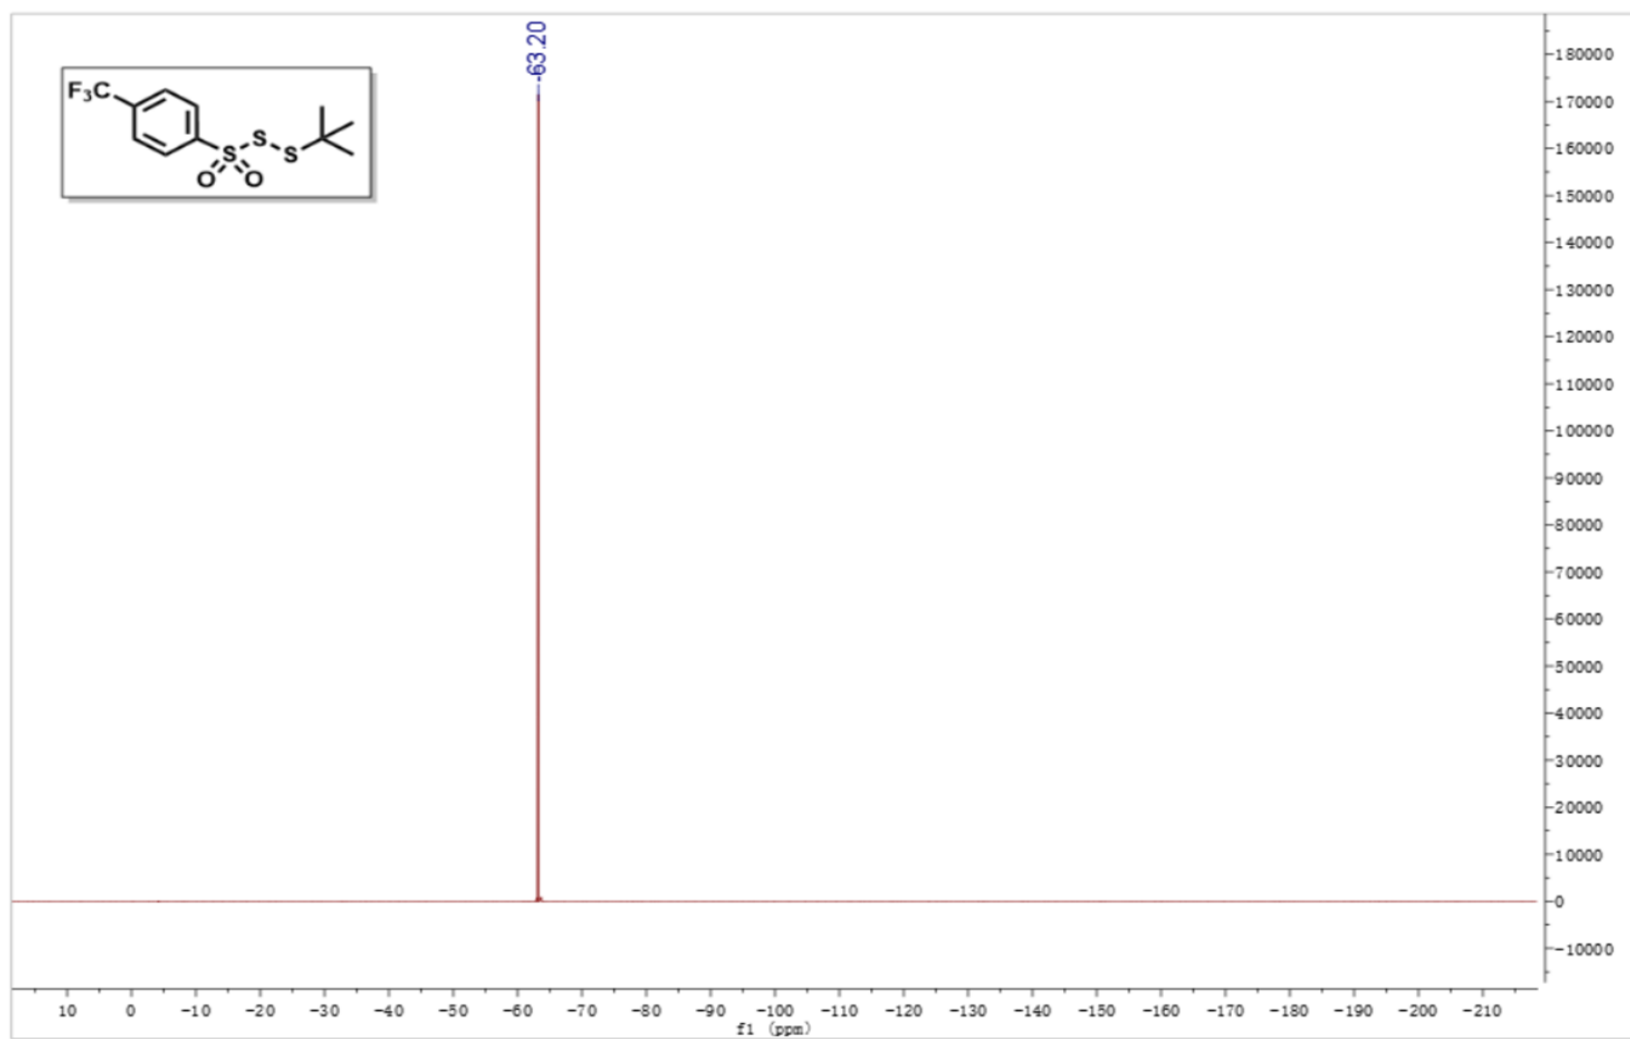

<sup>1</sup>H NMR of 3i

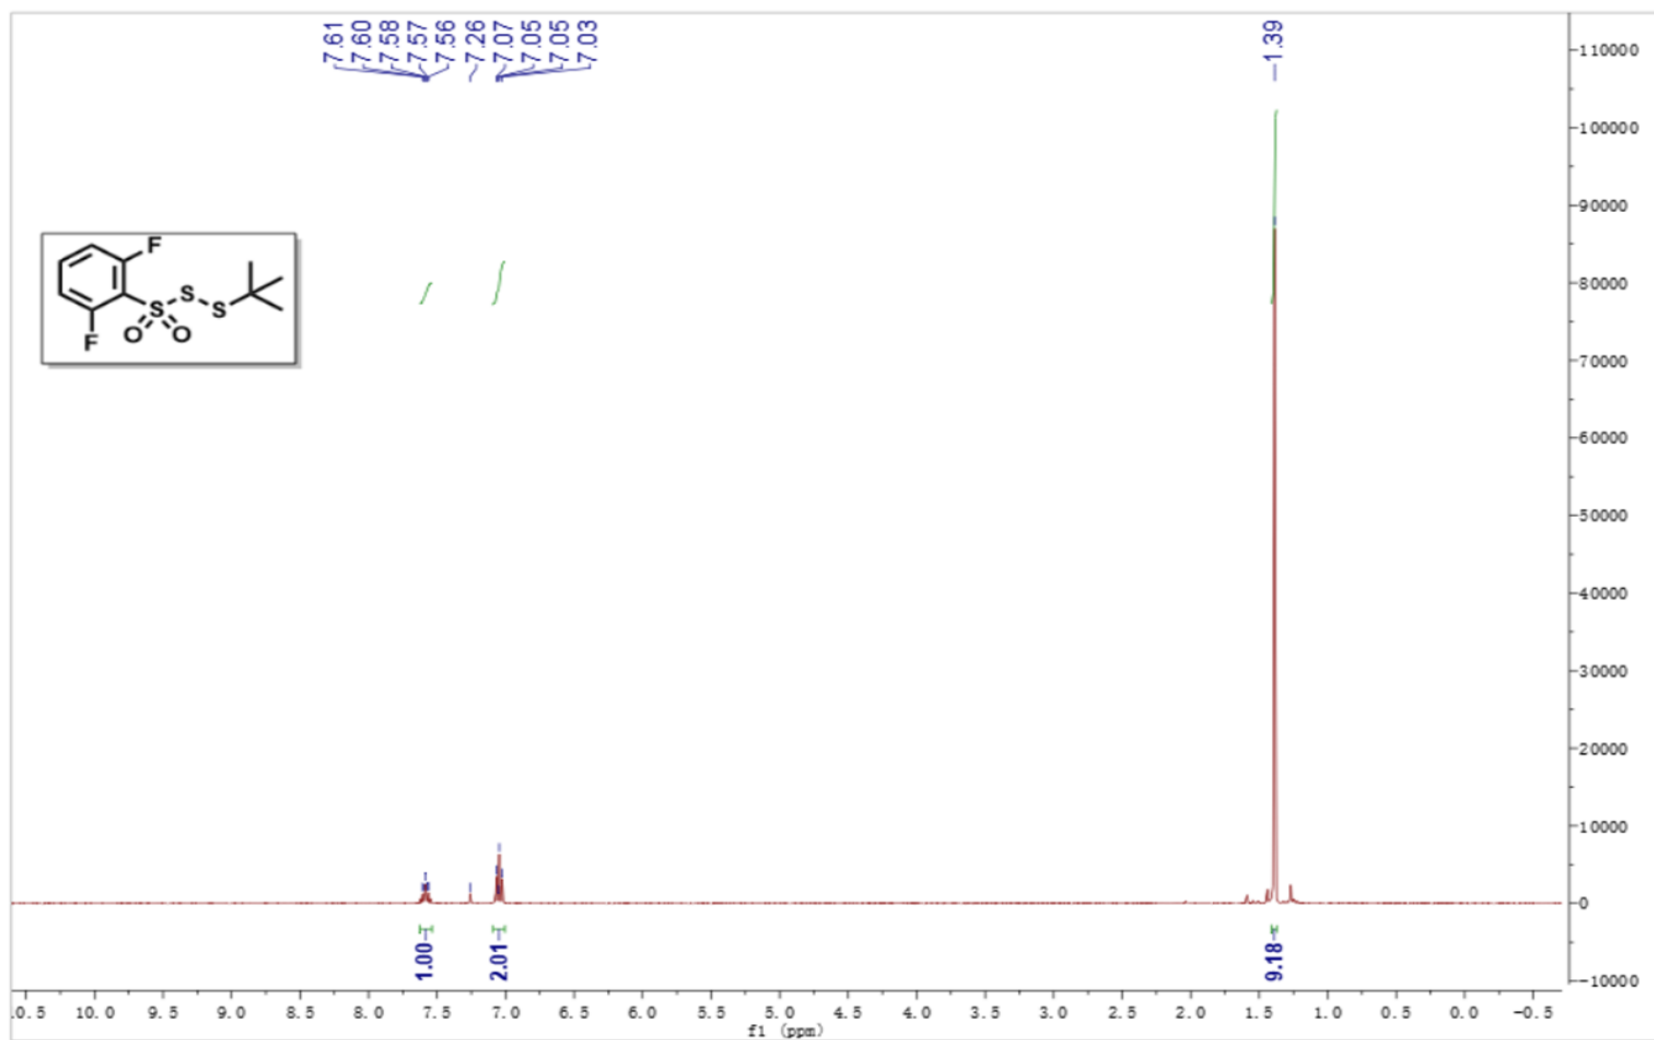

**$^{13}\text{C}$  NMR of 3i**

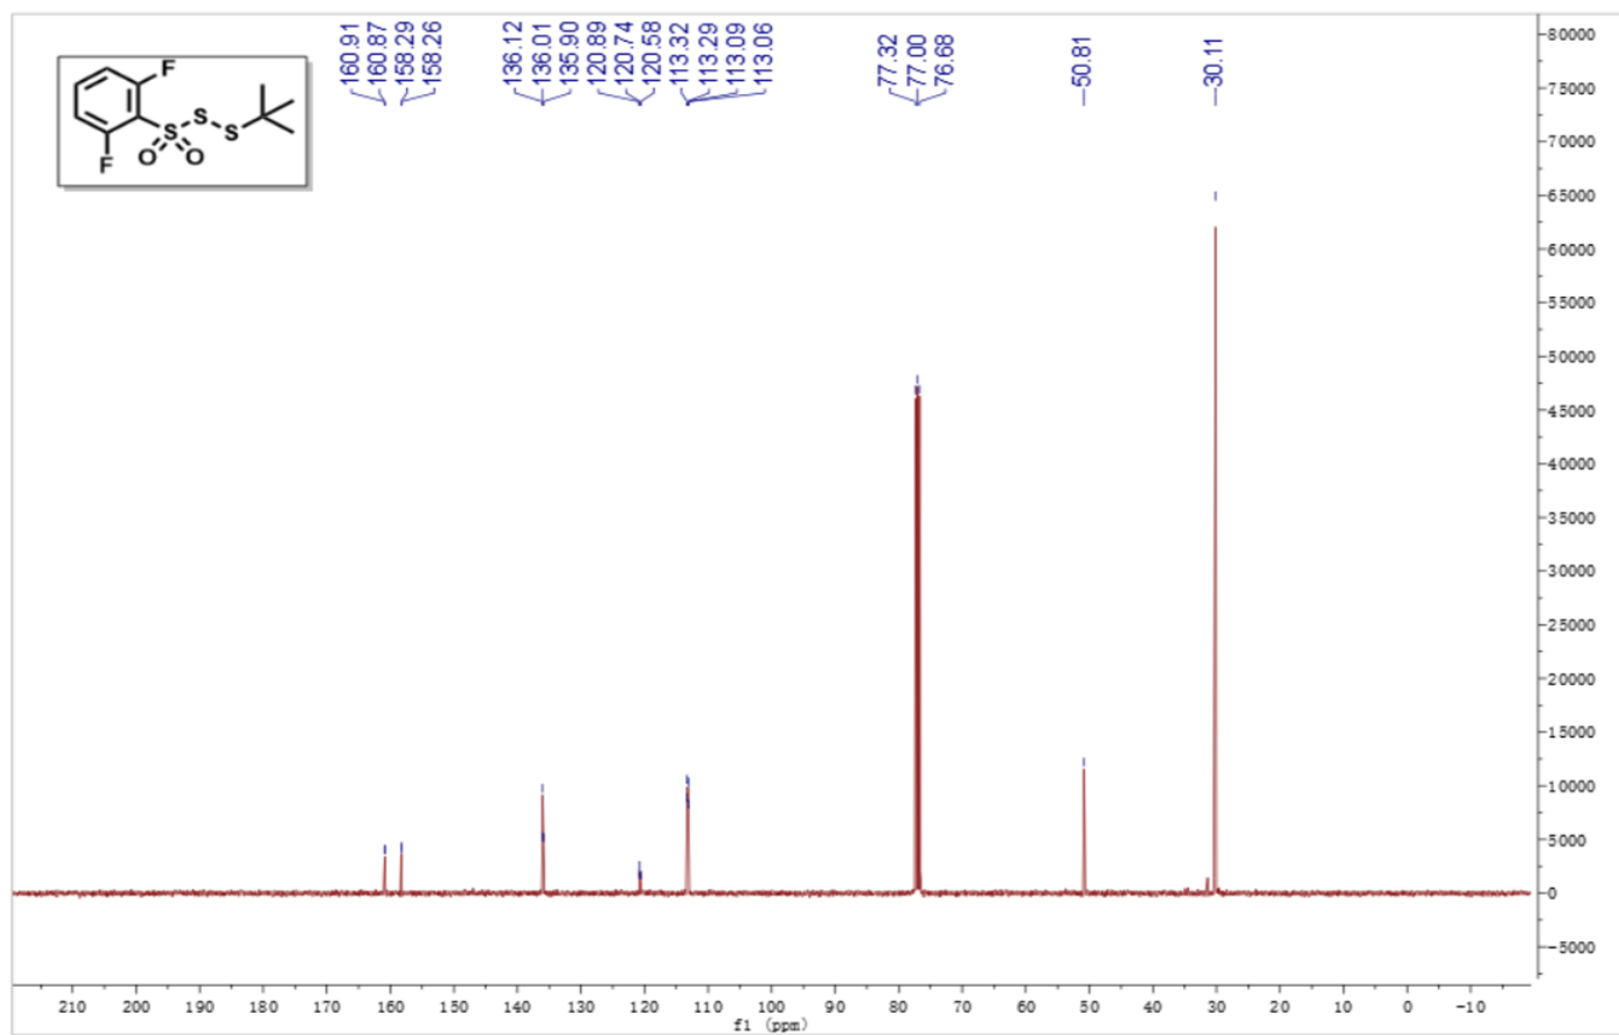

**$^{19}\text{F}$  NMR of 3i**

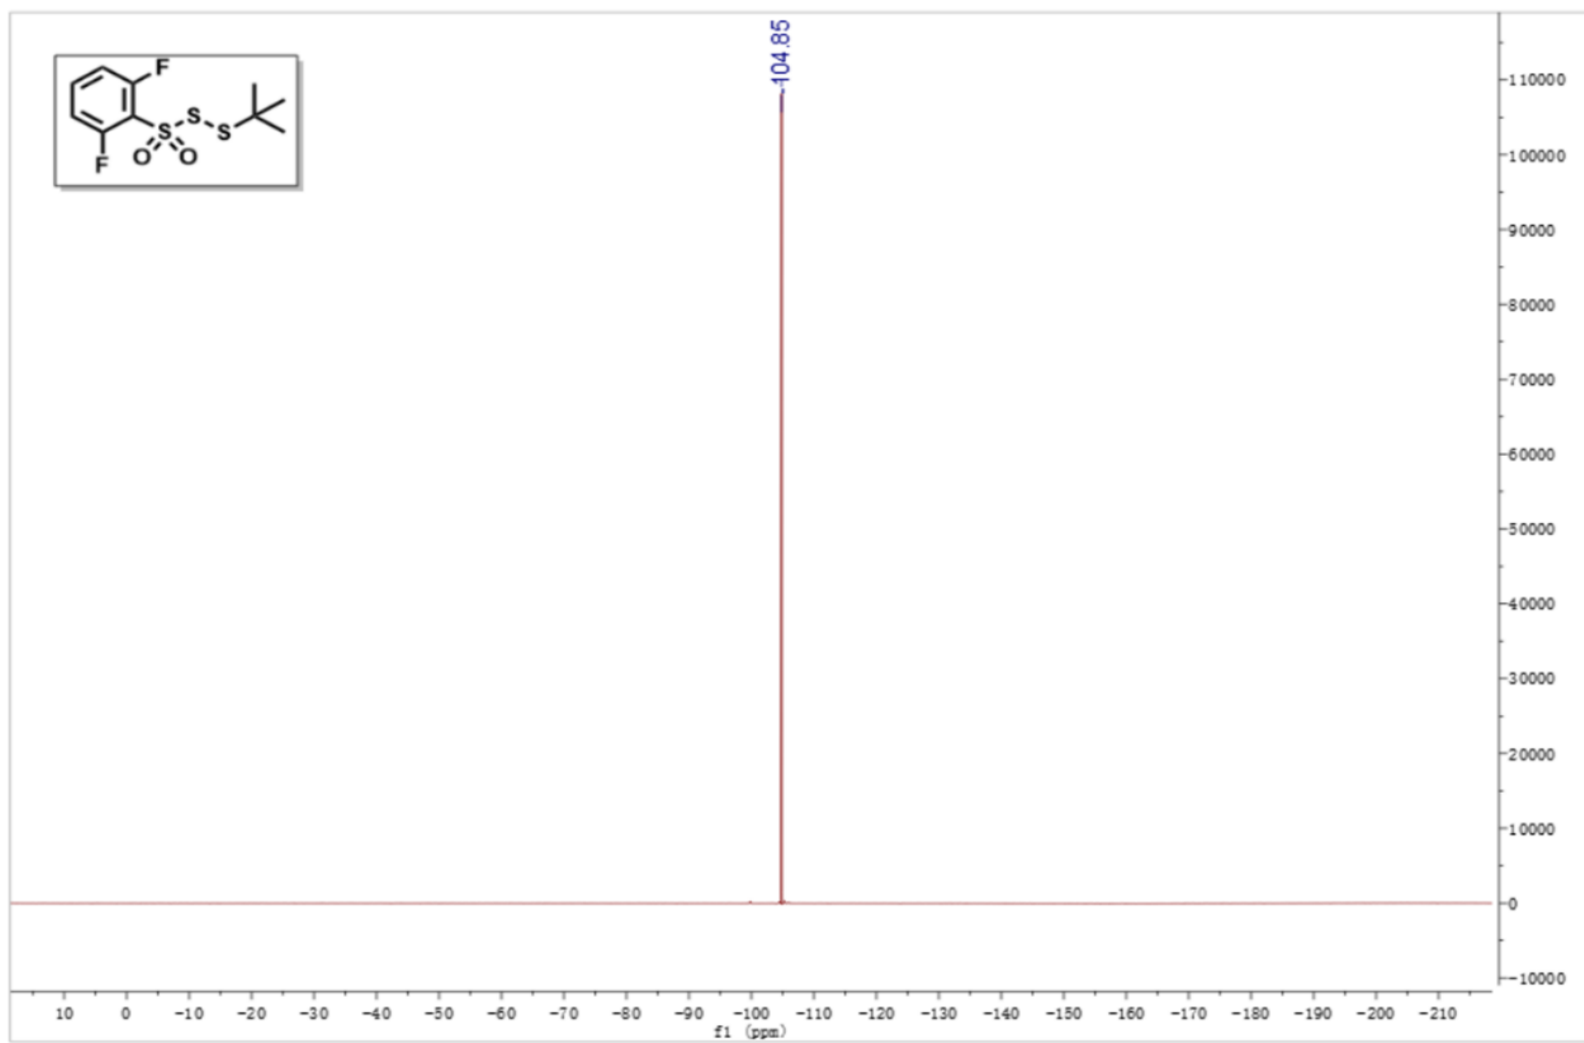

<sup>1</sup>H NMR of 3j

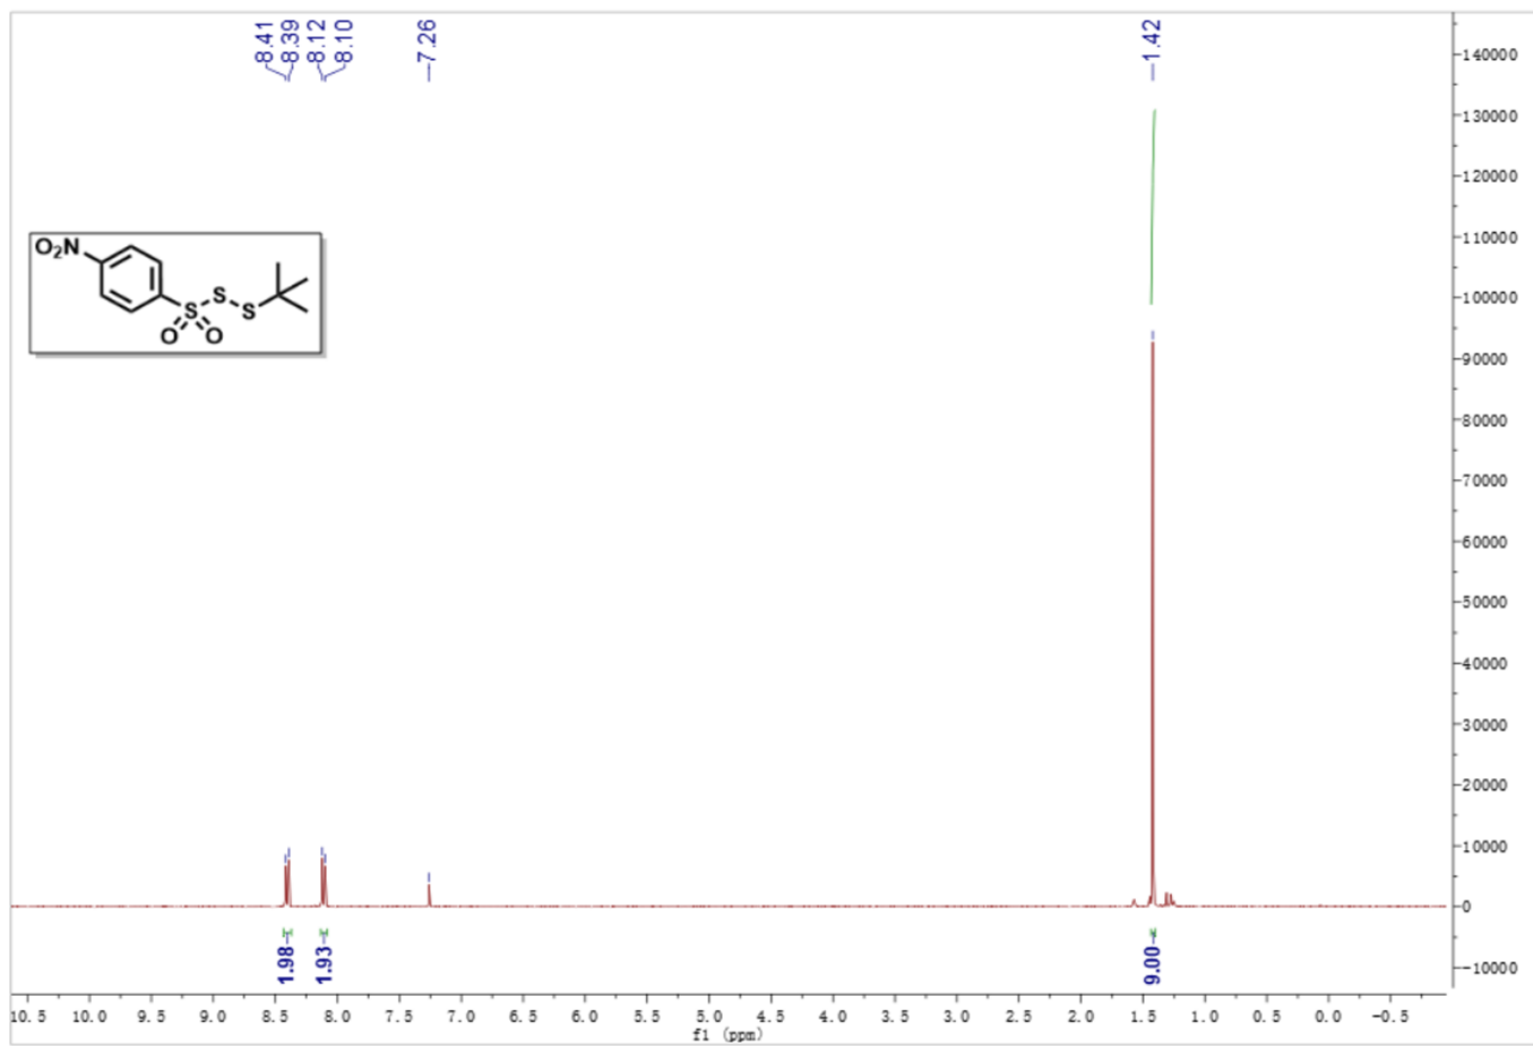

<sup>13</sup>C NMR of 3j

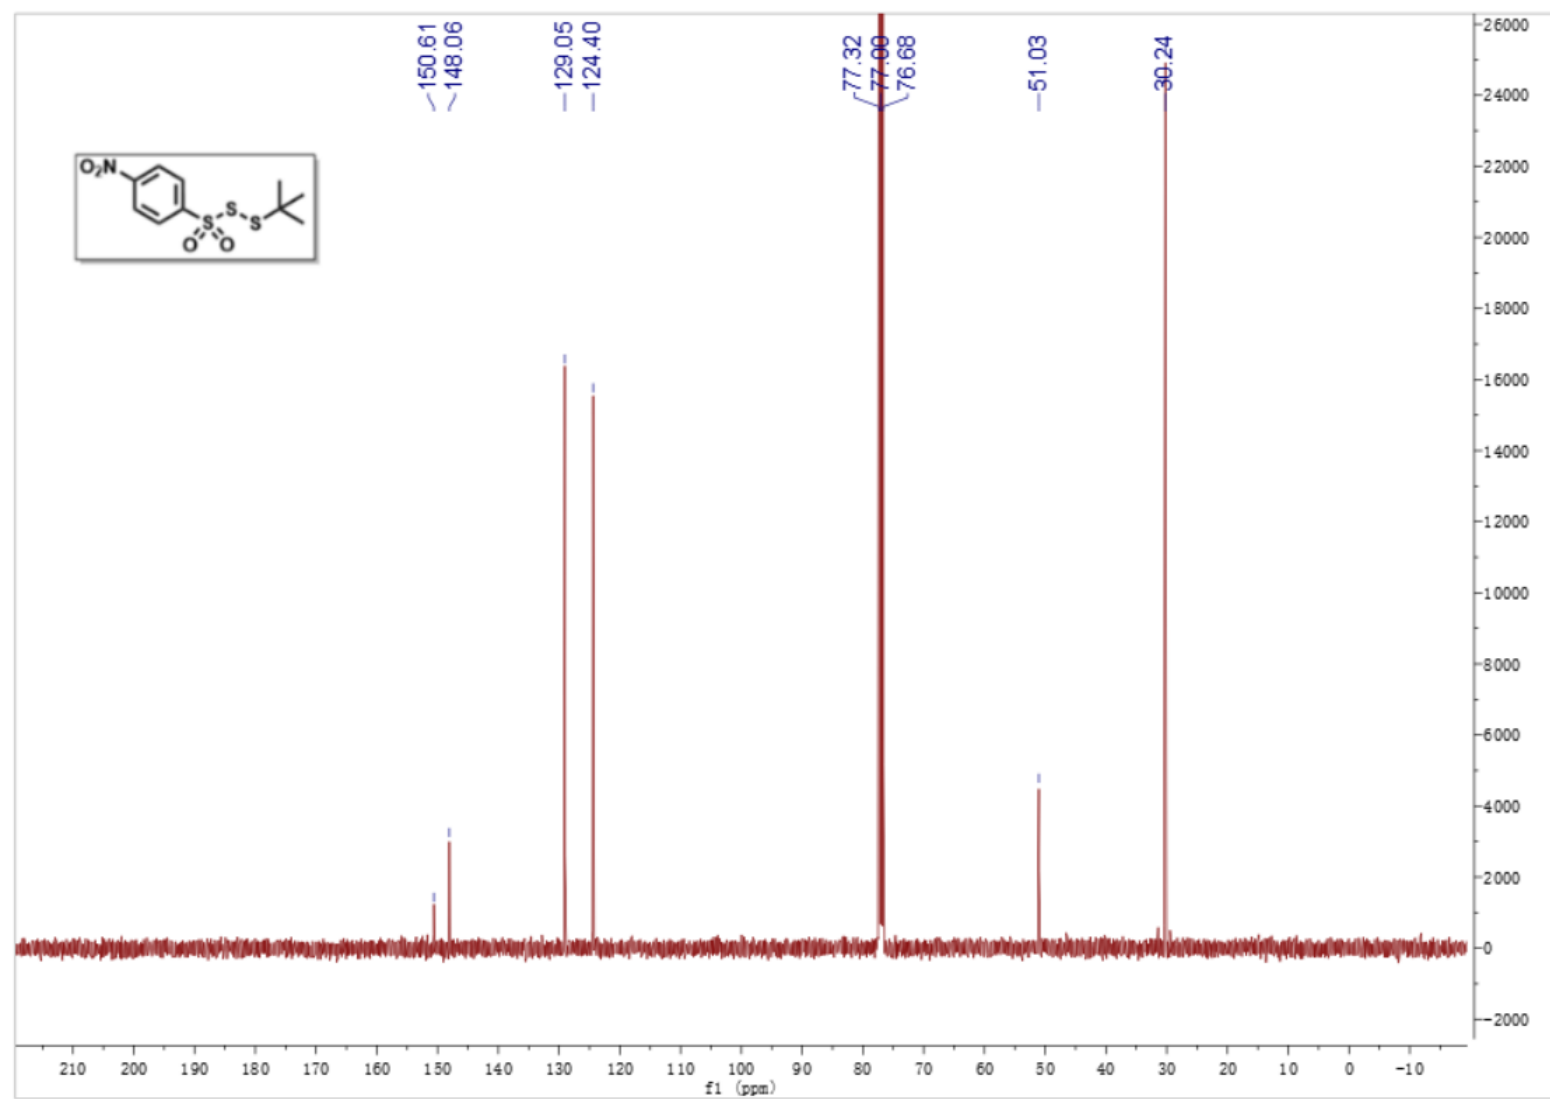

<sup>1</sup>H NMR of 3k

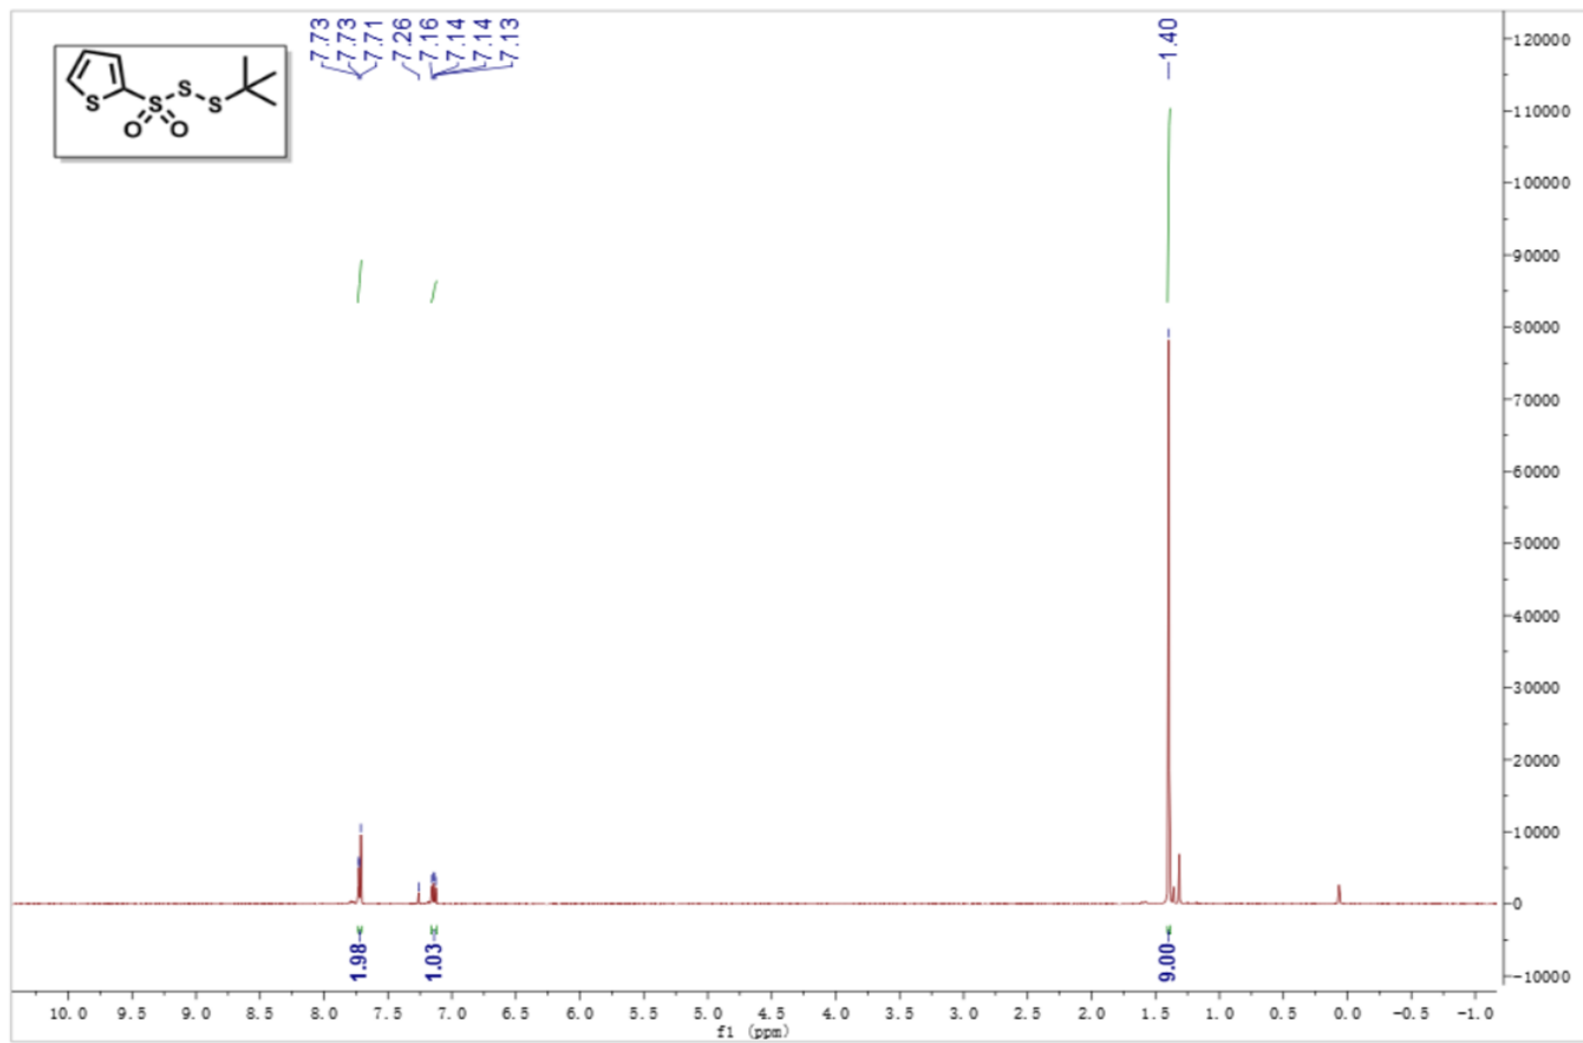



**$^{13}\text{C}$  NMR of 3k**

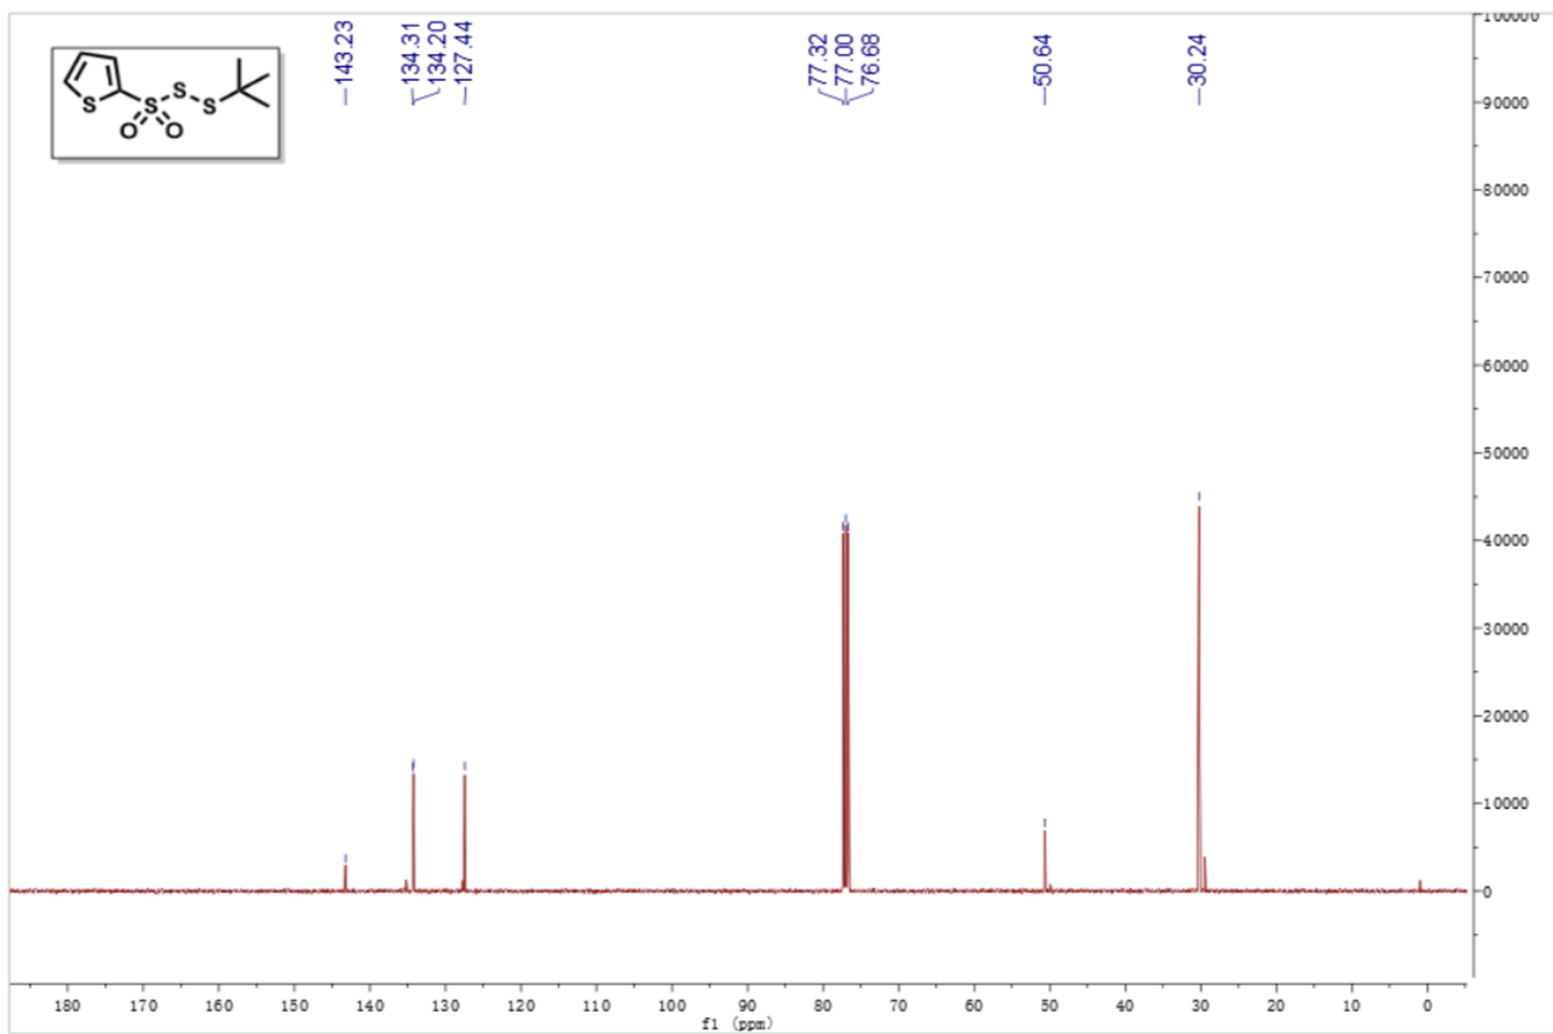

<sup>1</sup>H NMR of 3l

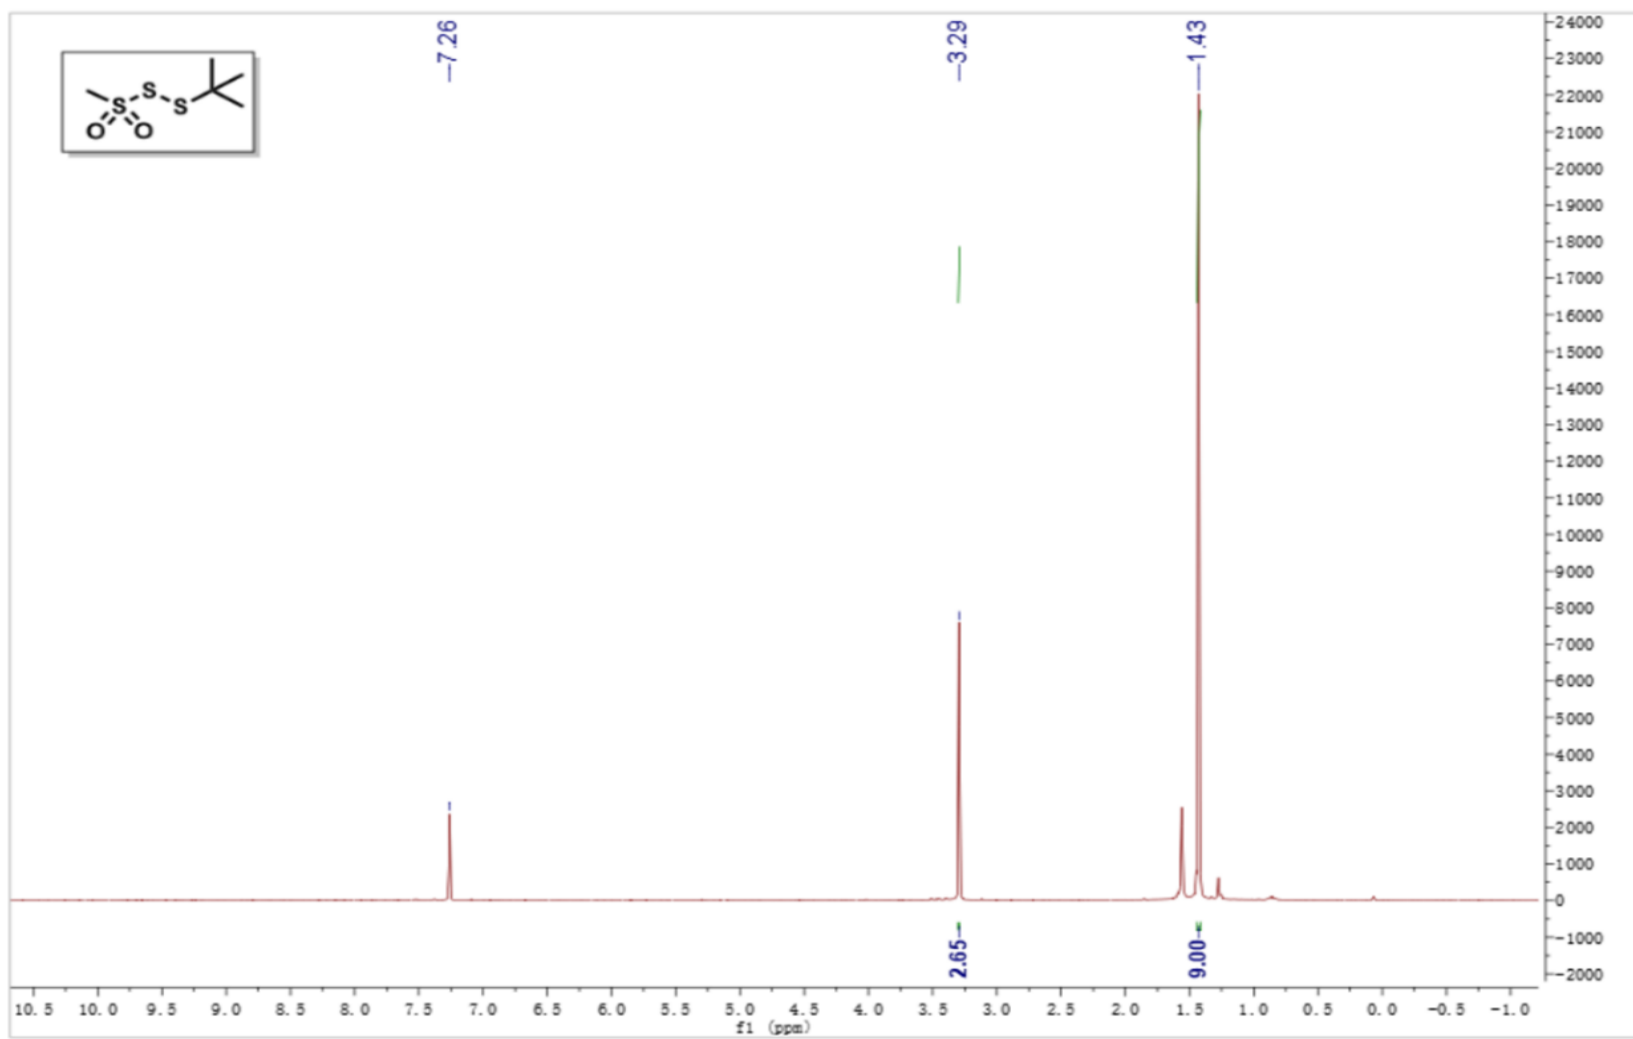

<sup>13</sup>C NMR of 3l

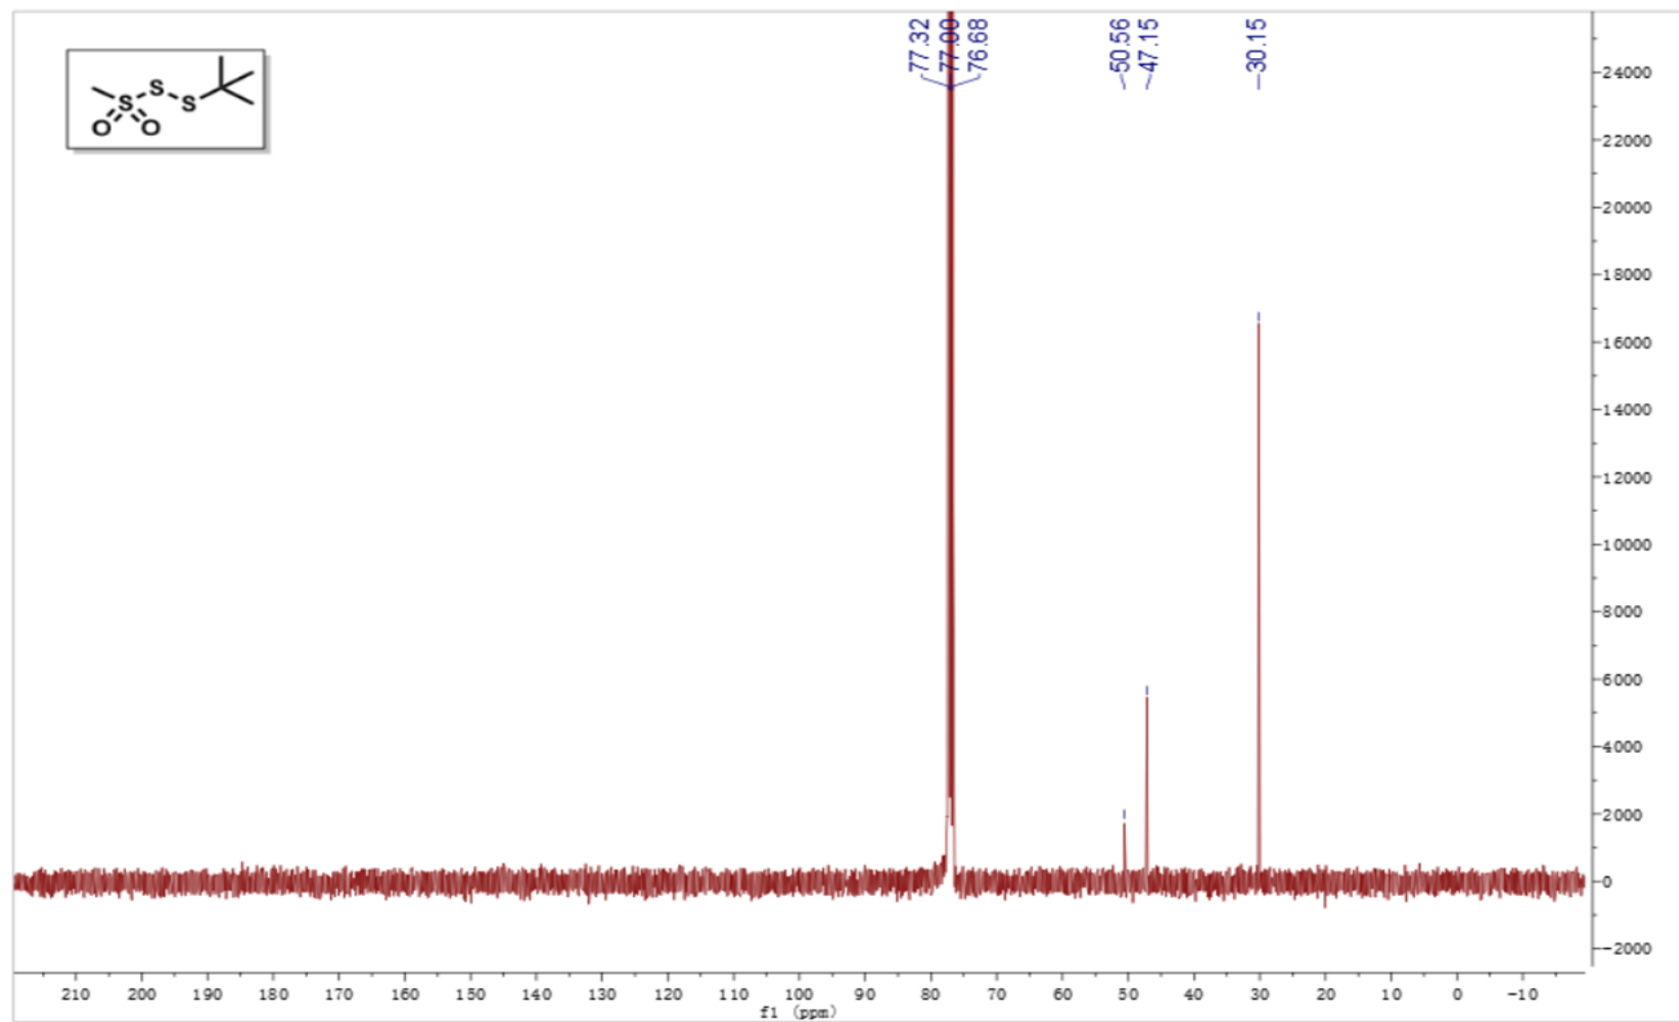

<sup>1</sup>H NMR of 3m

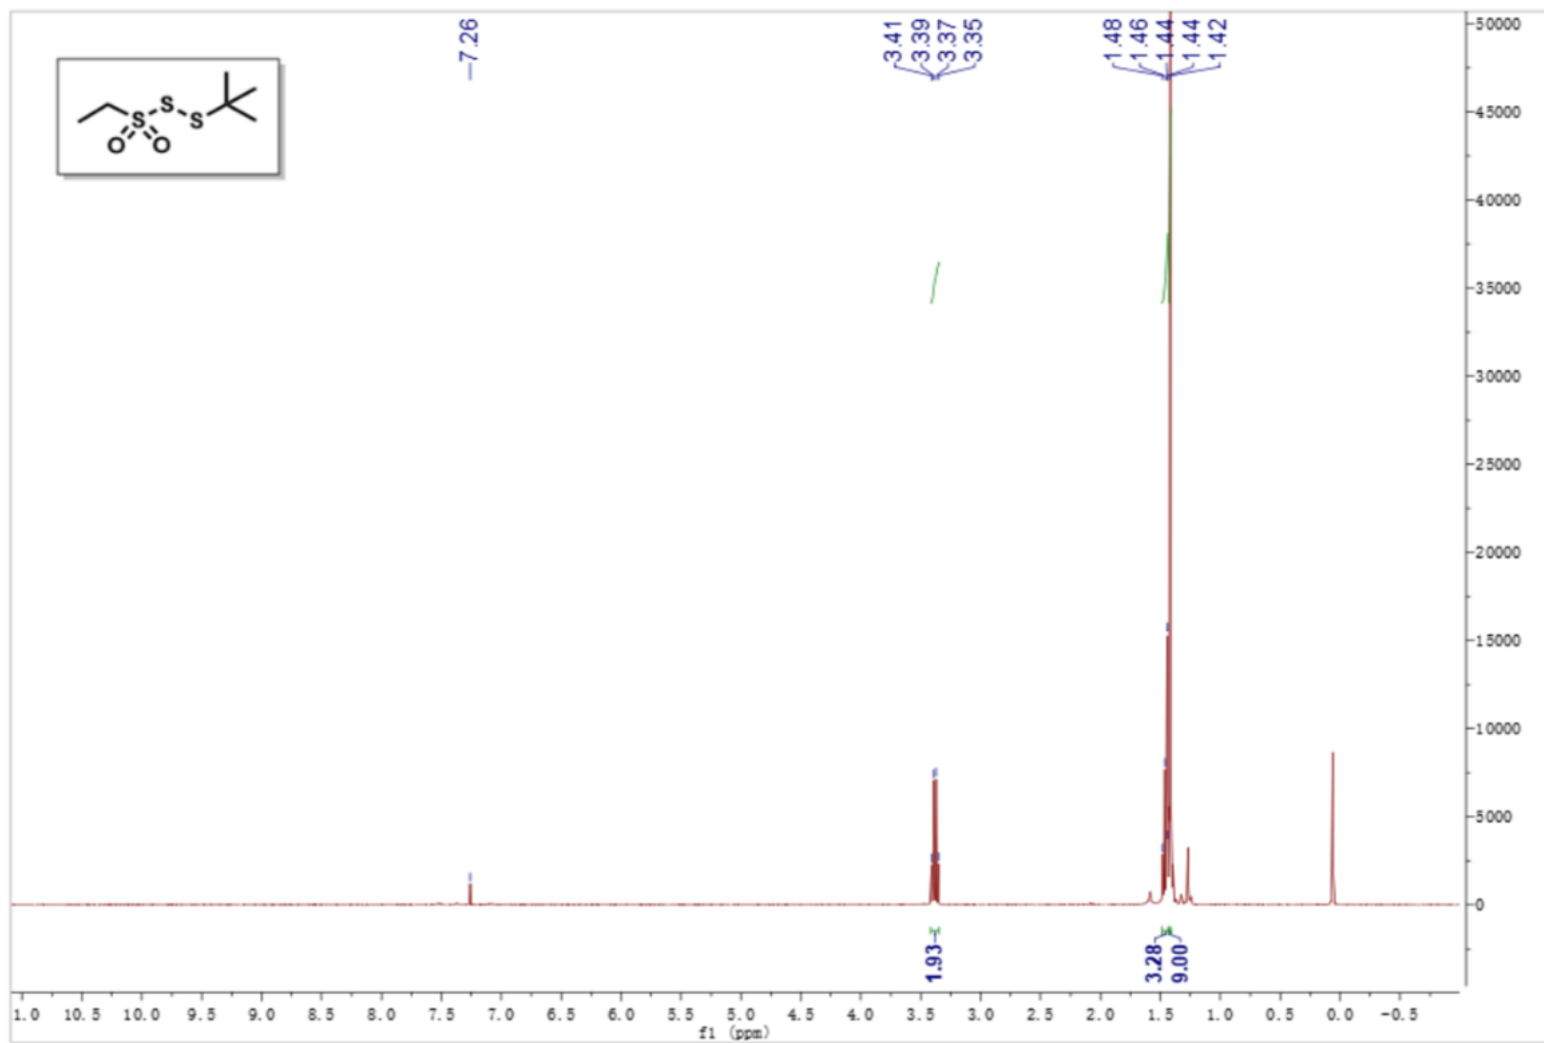

<sup>13</sup>C NMR of 3m

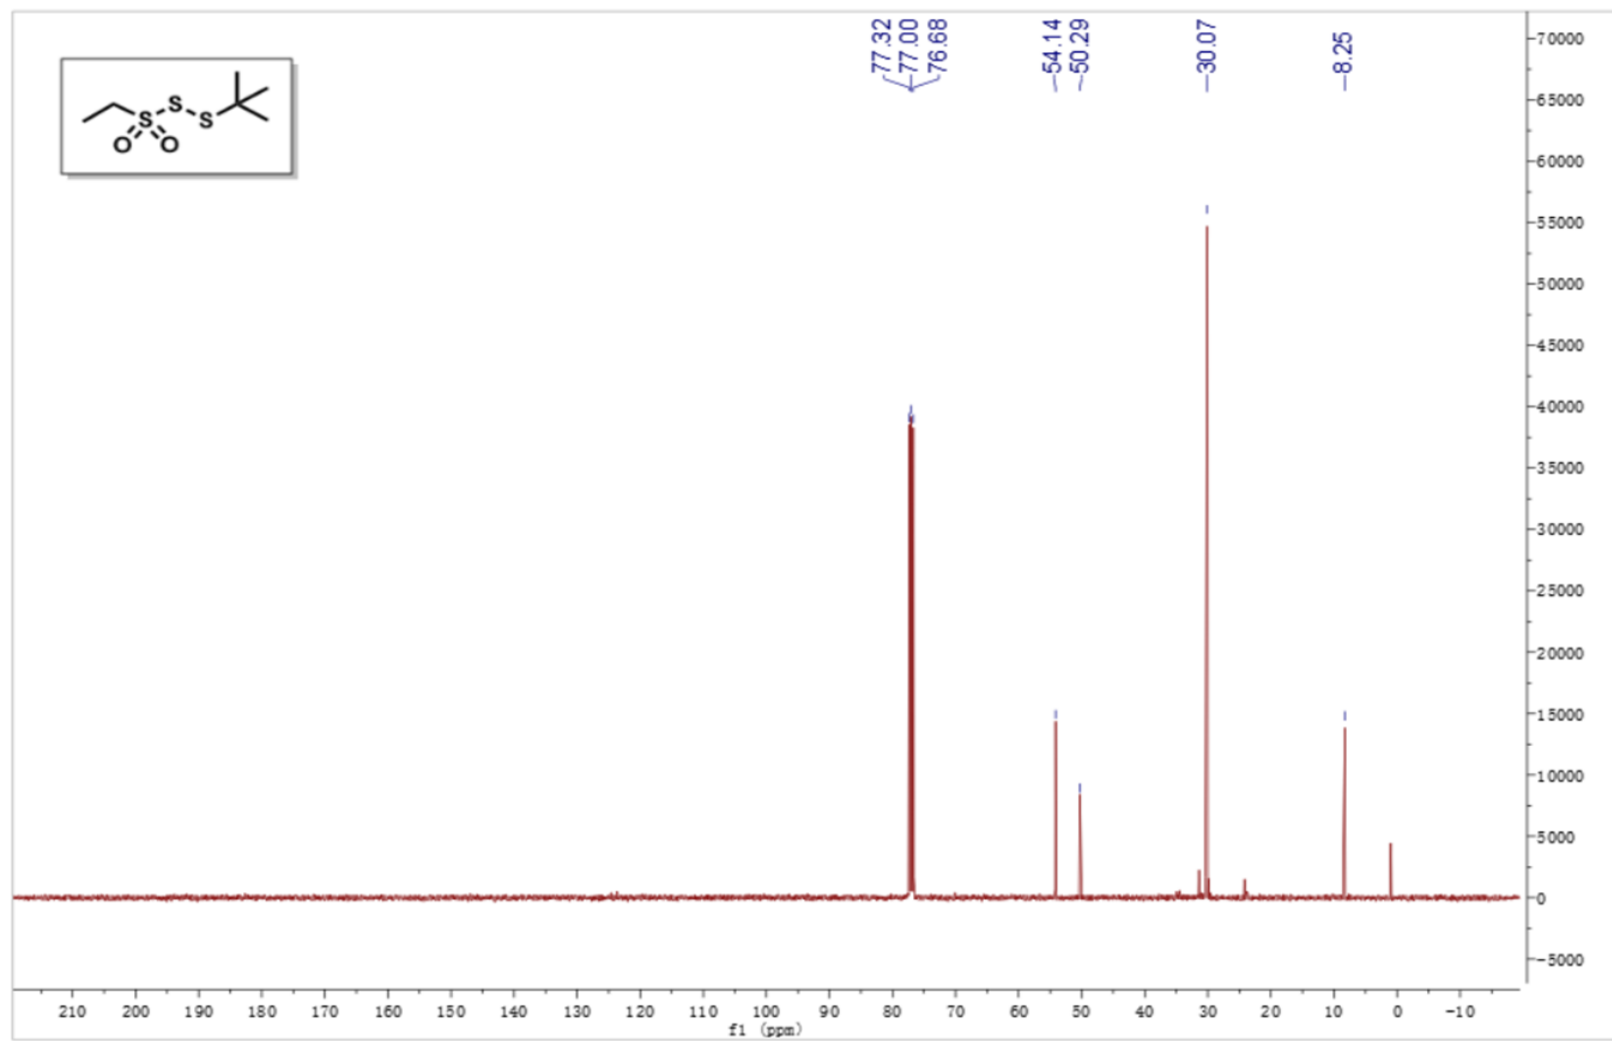

<sup>1</sup>H NMR of 3n

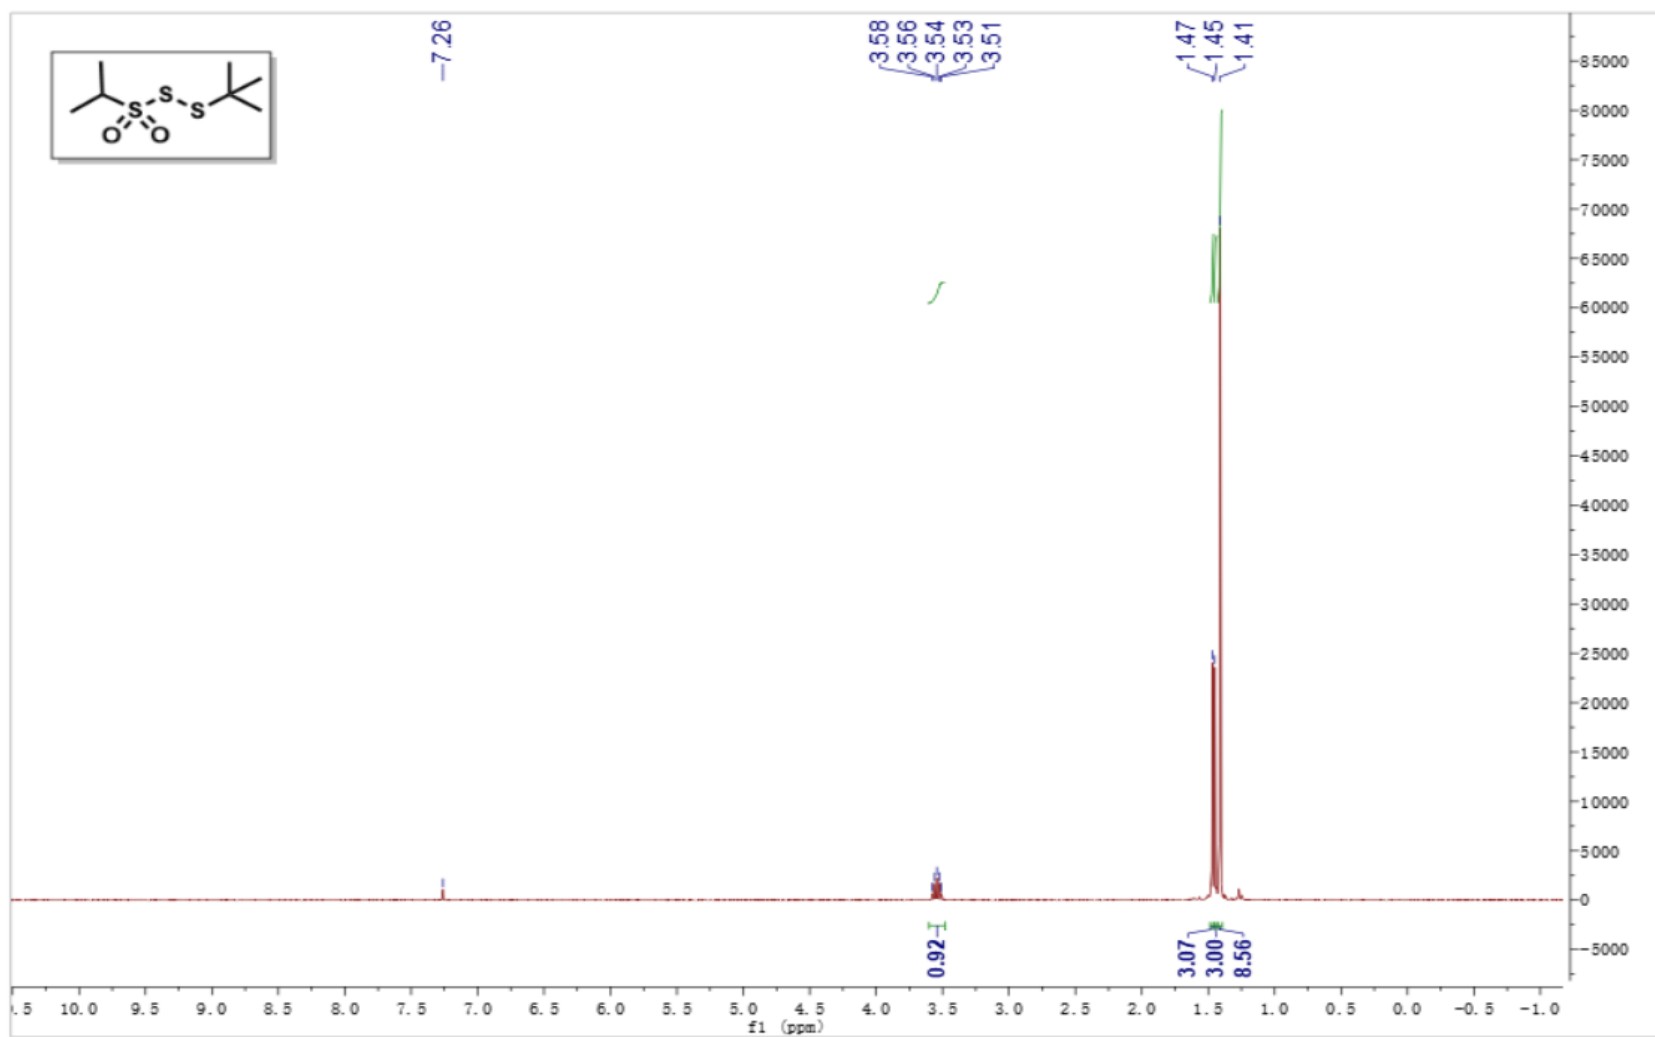

<sup>13</sup>C NMR of 3n

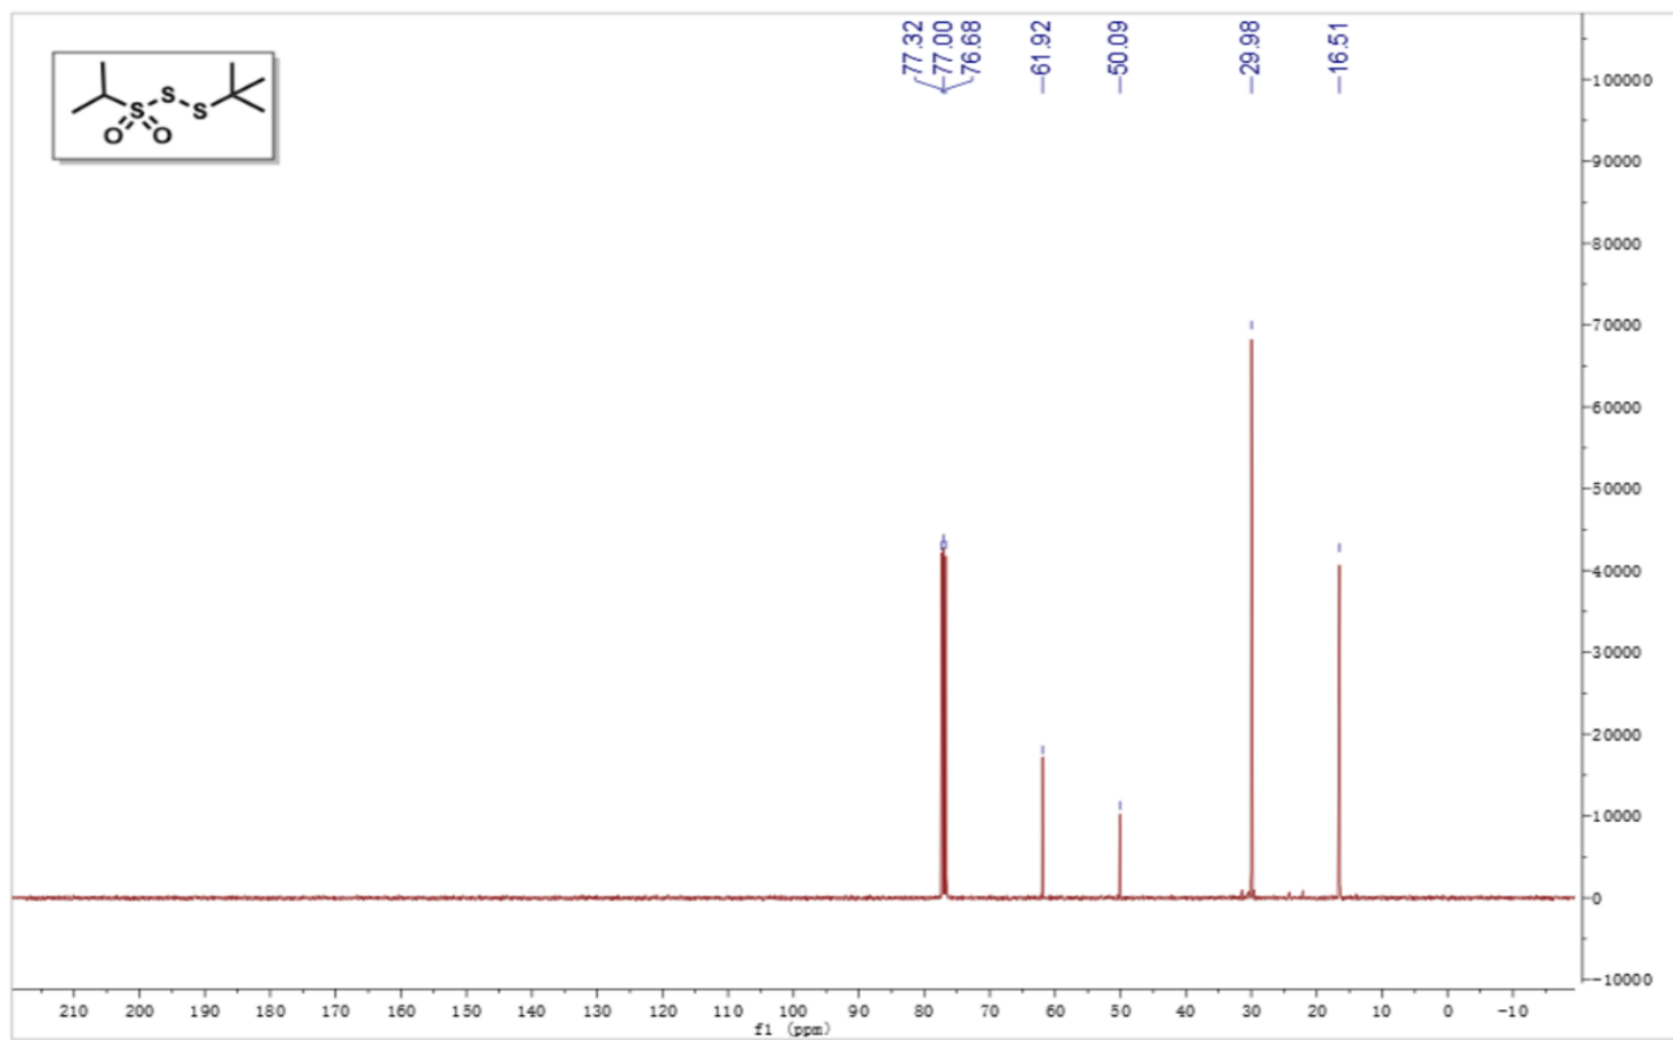

<sup>1</sup>H NMR of 3o

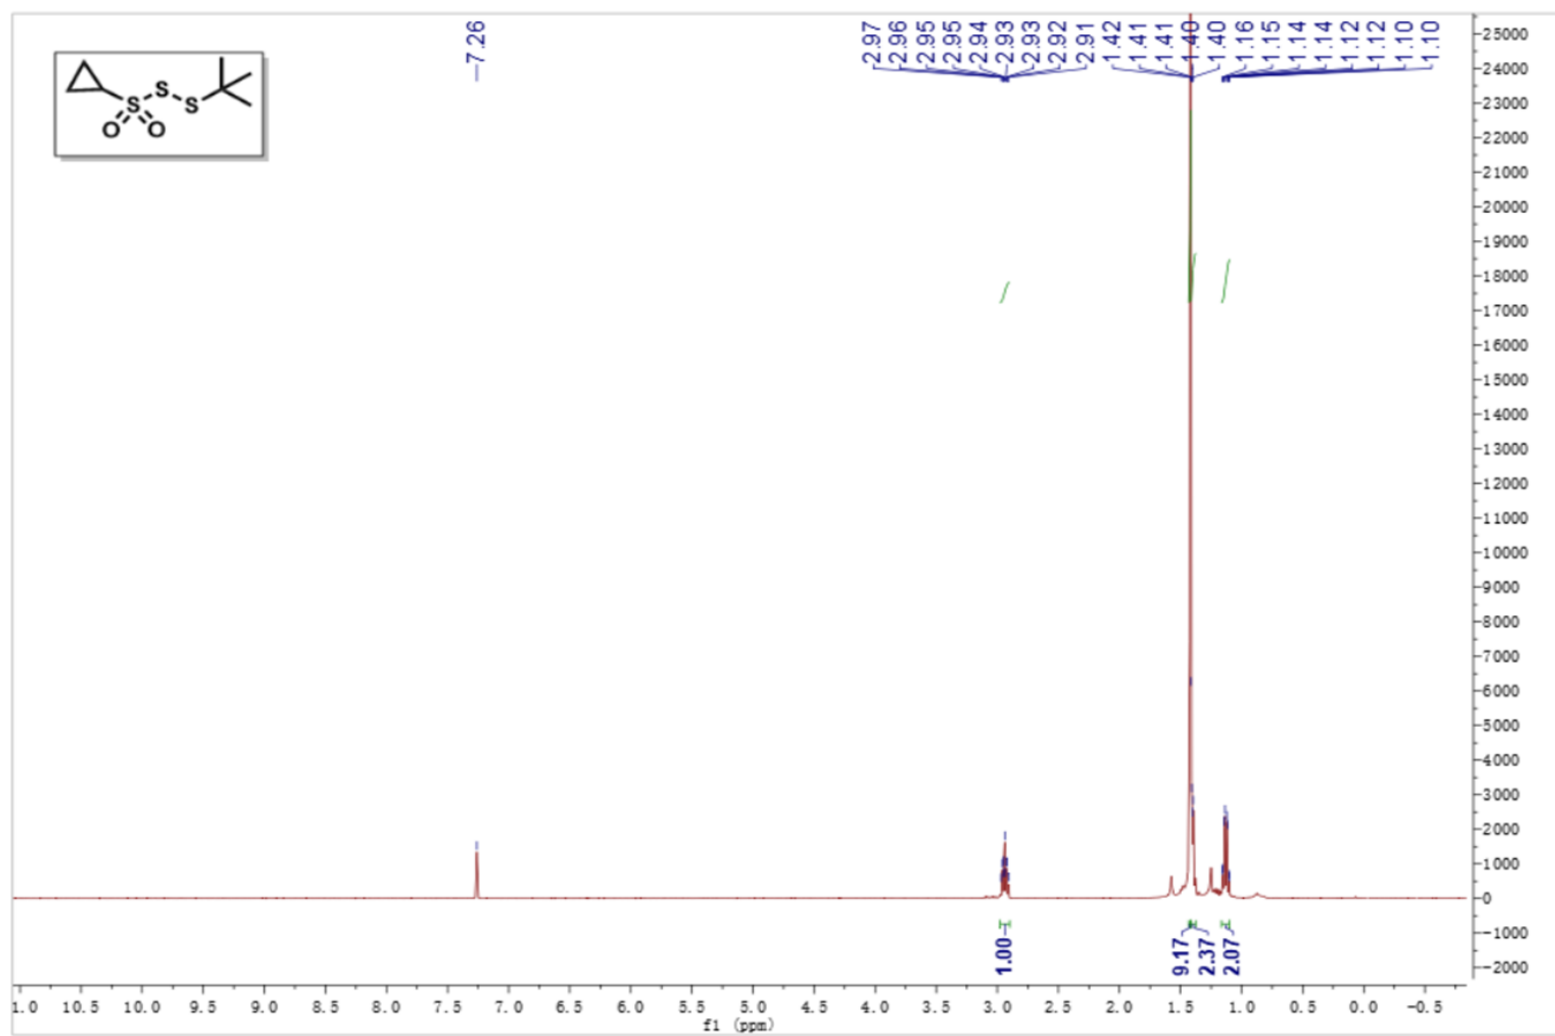



<sup>13</sup>C NMR of 3o

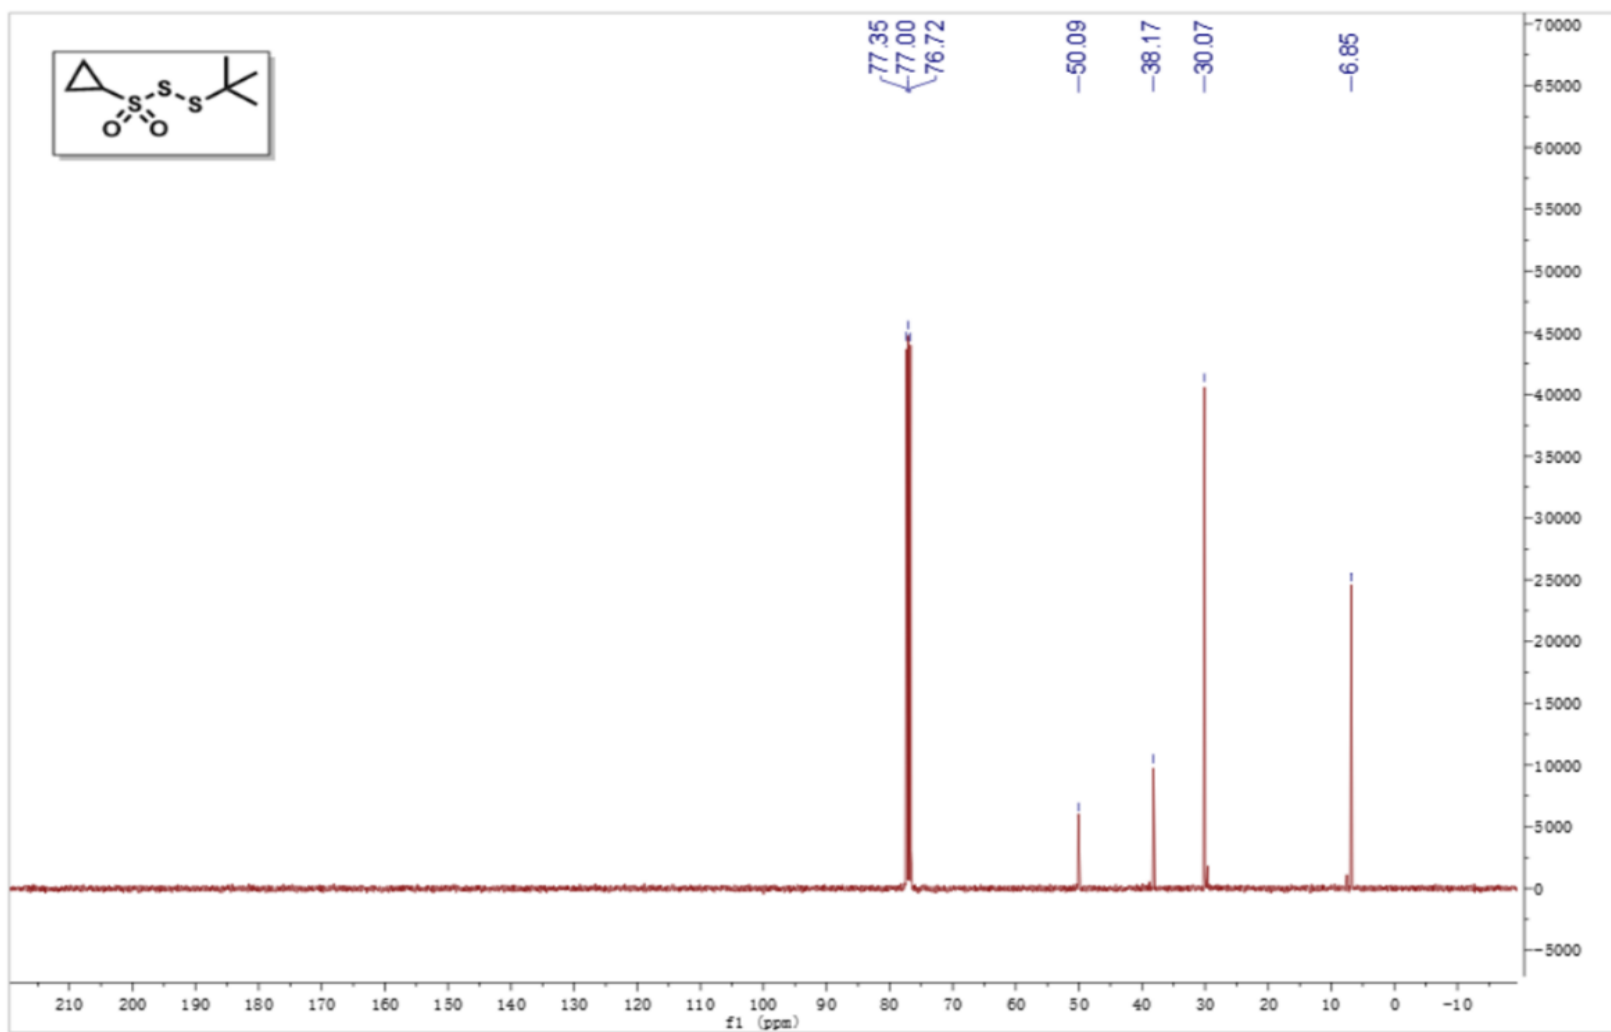

<sup>1</sup>H NMR of 3p

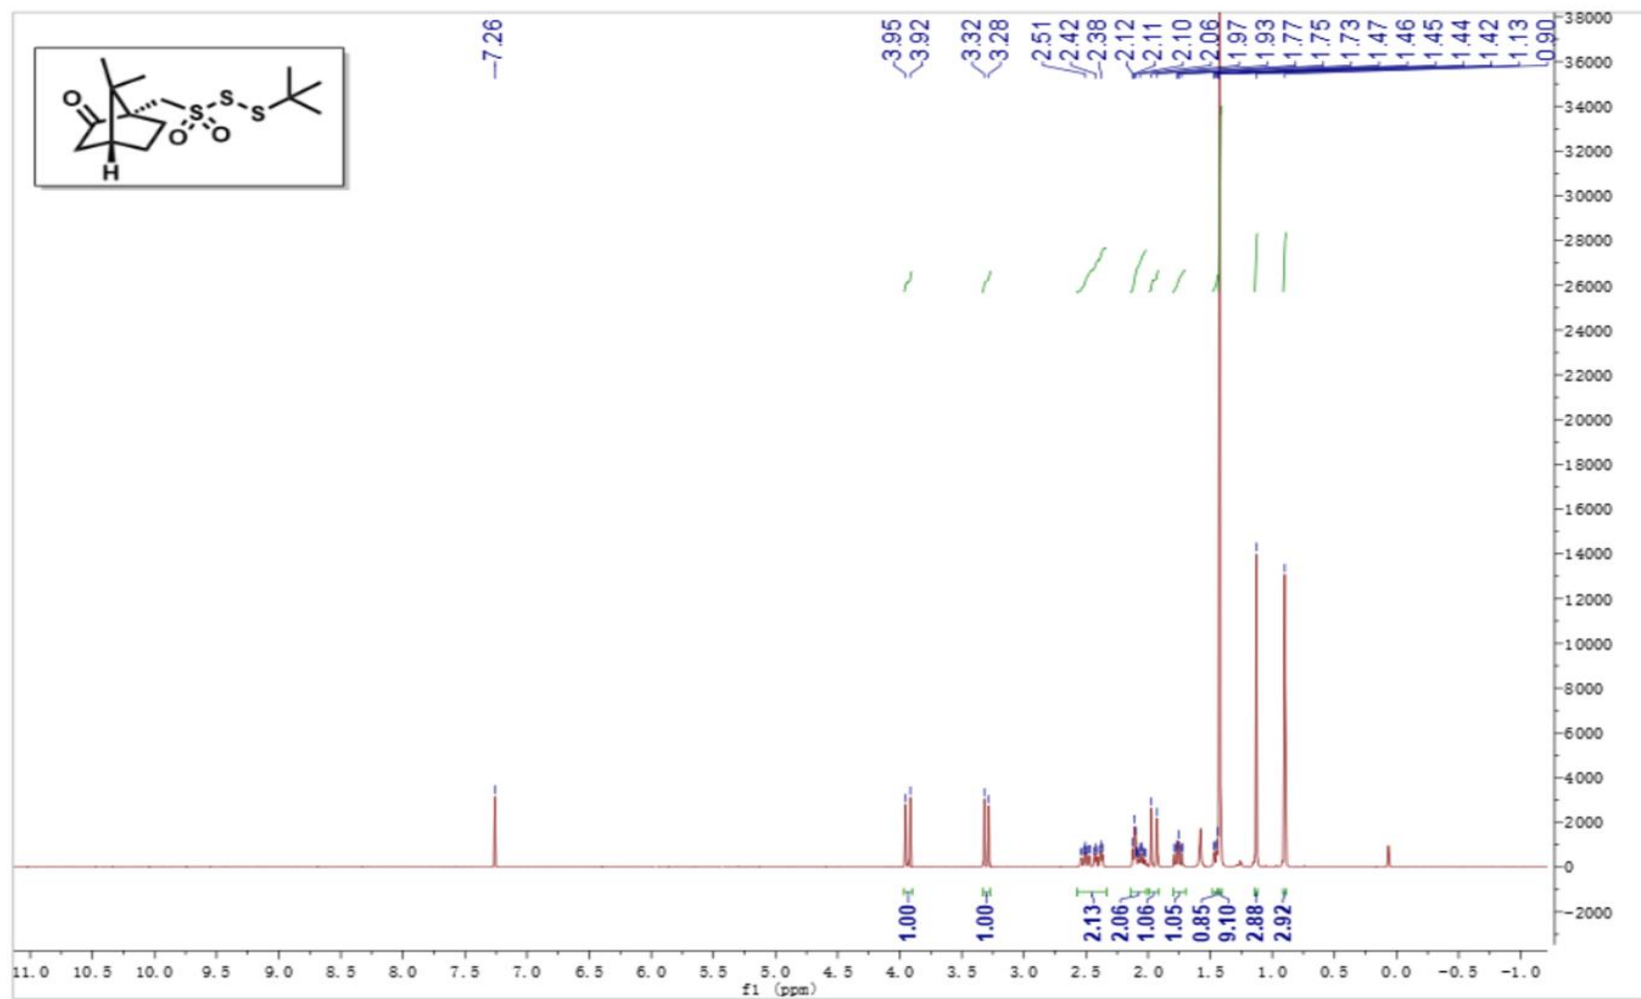

<sup>13</sup>C NMR of 3p

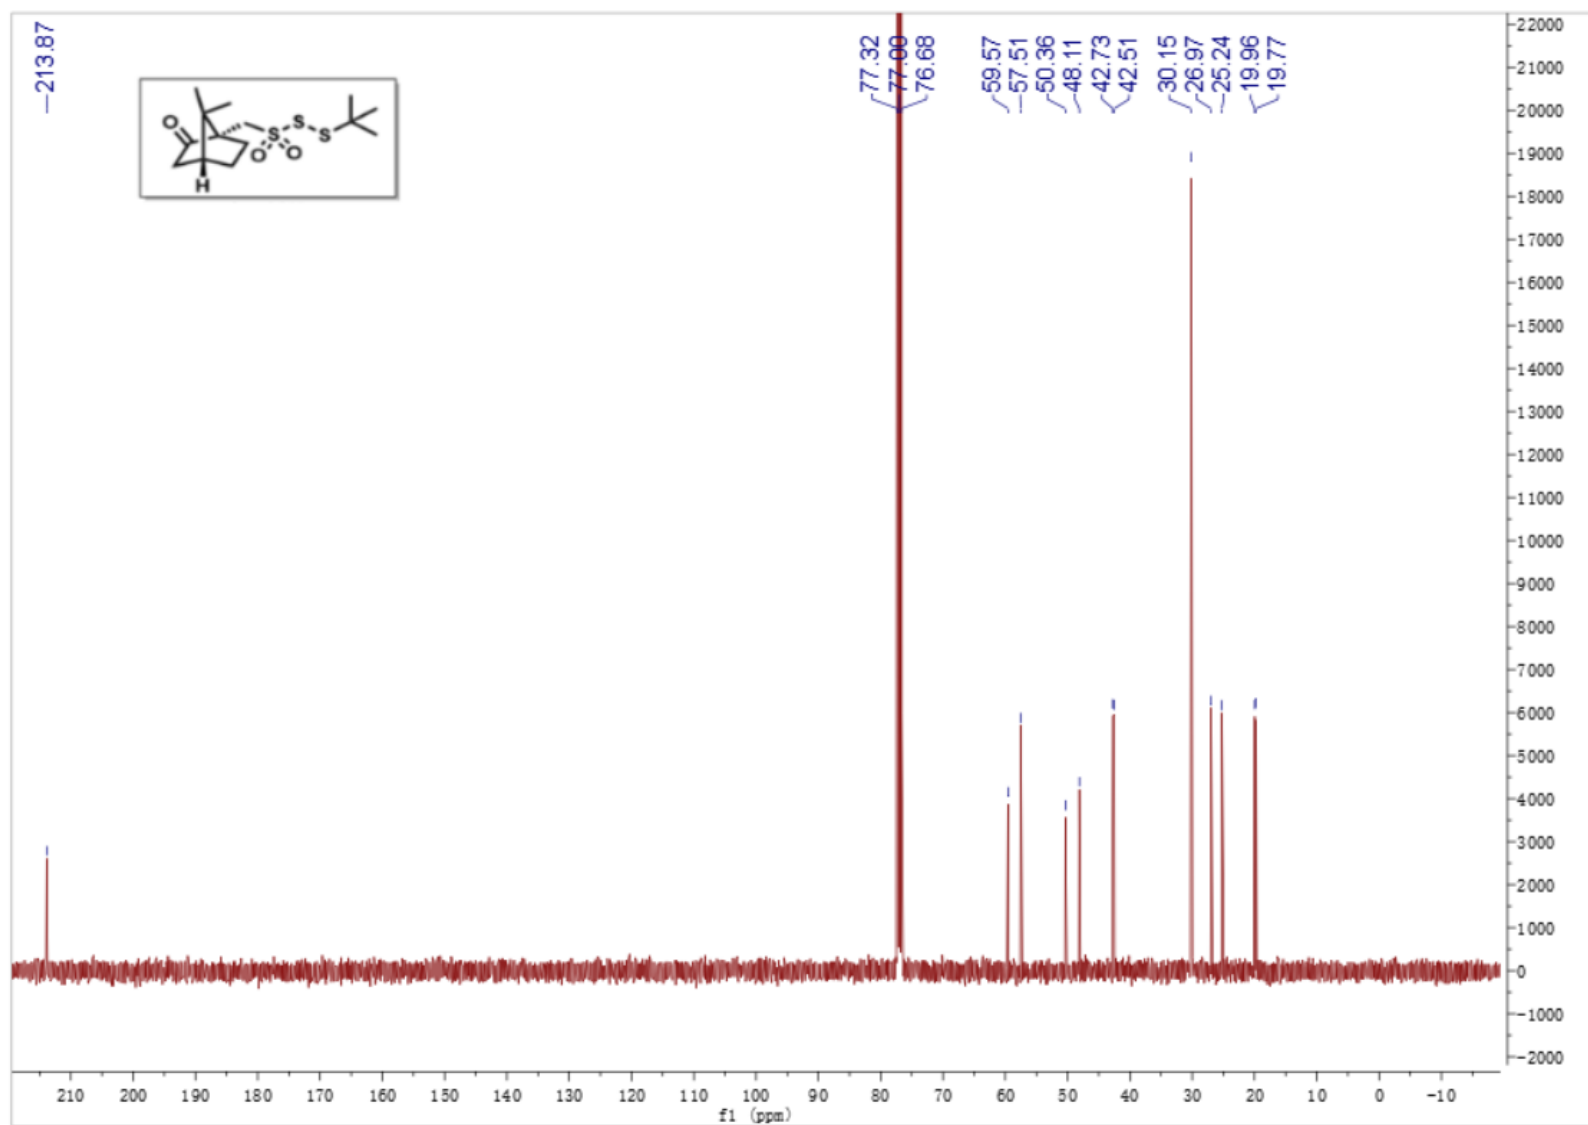

<sup>1</sup>H NMR of 3q

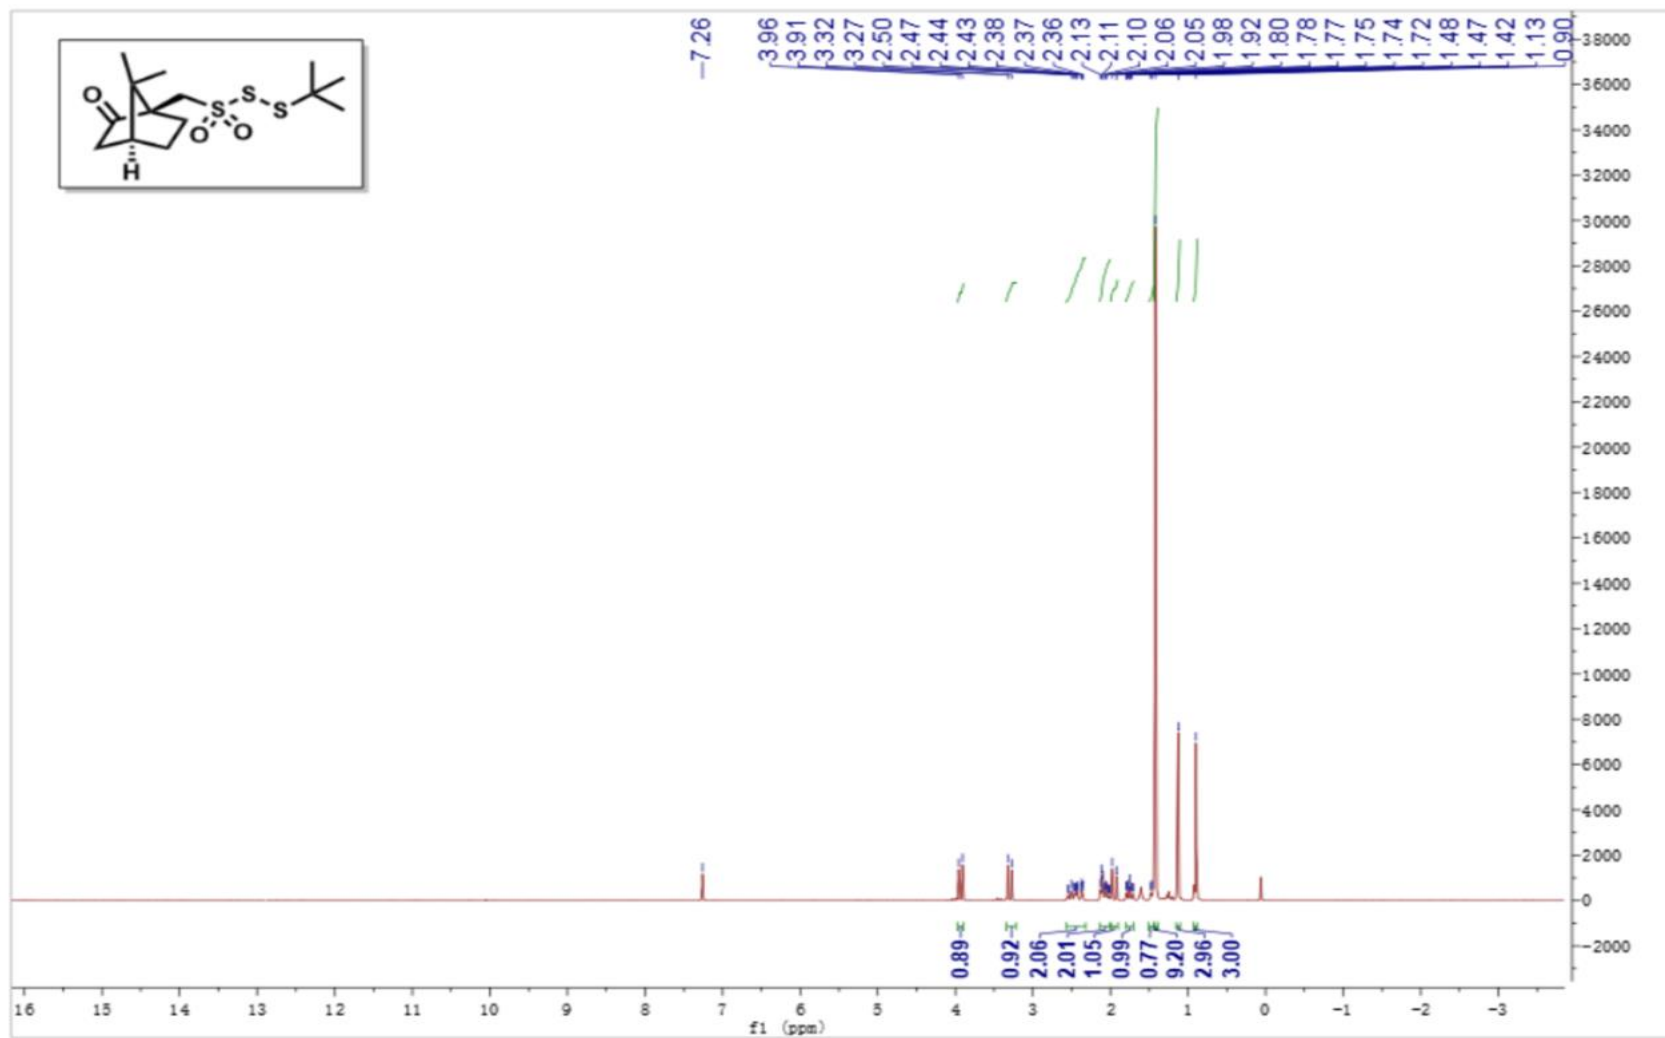

**<sup>13</sup>C NMR of 3q**

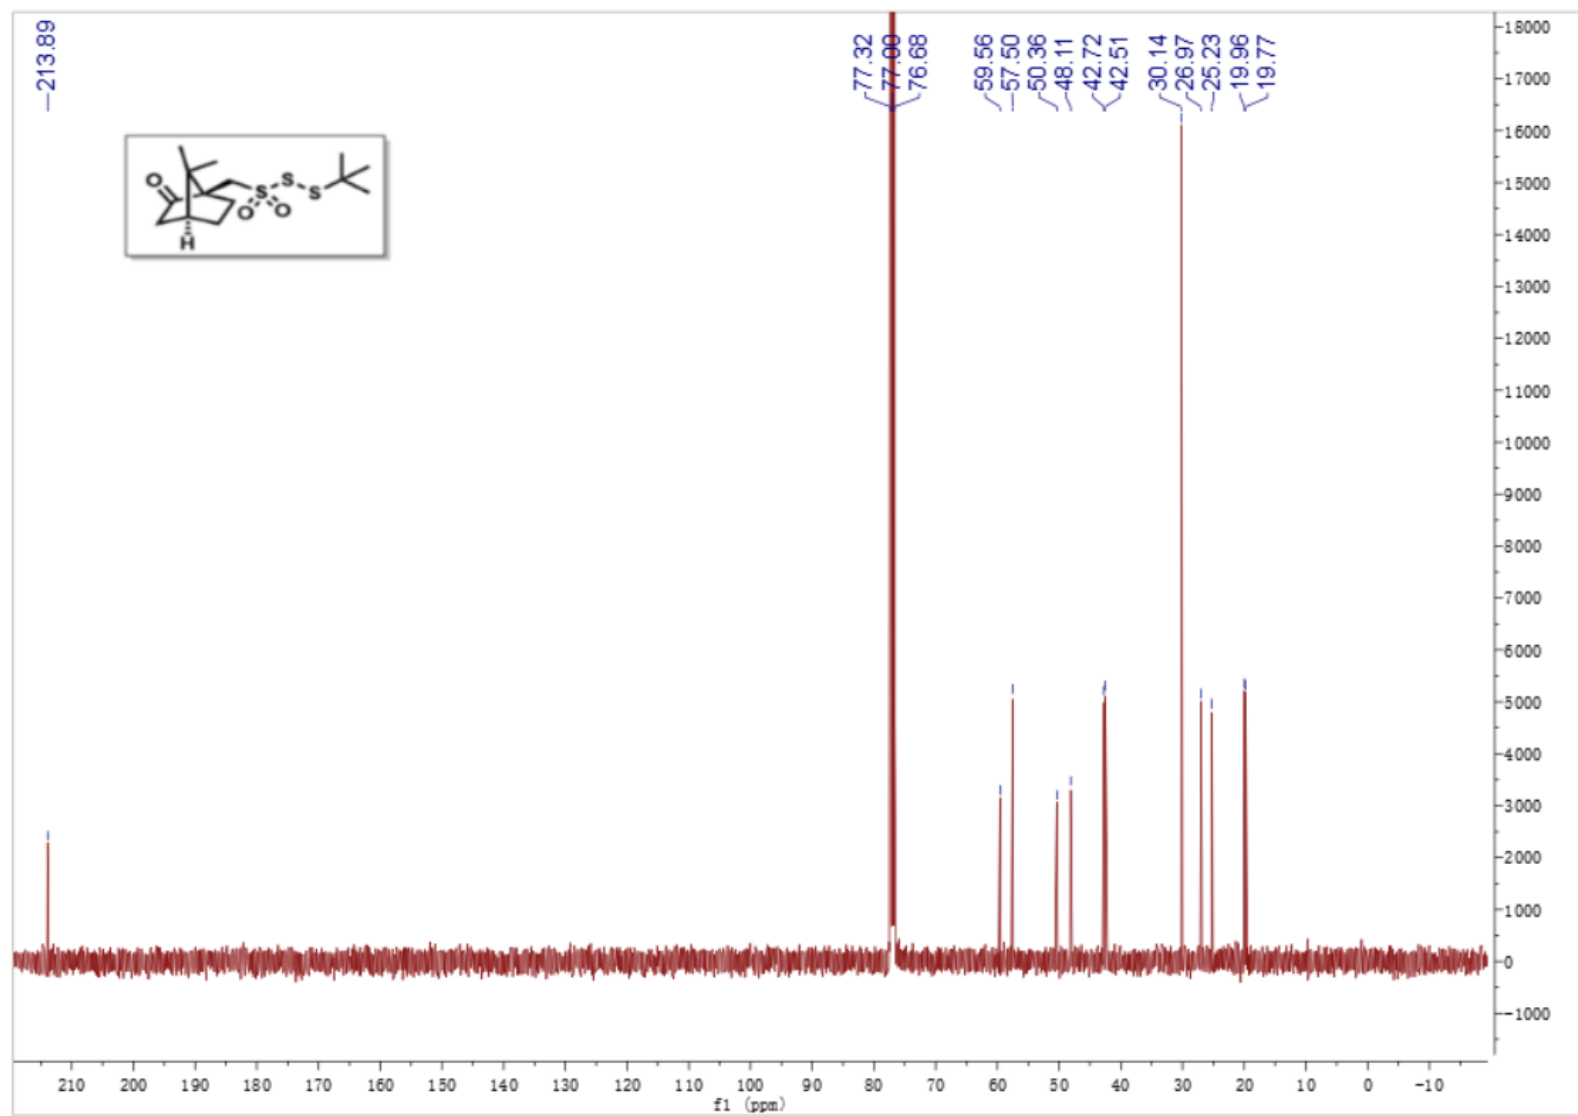

<sup>1</sup>H NMR of 3r

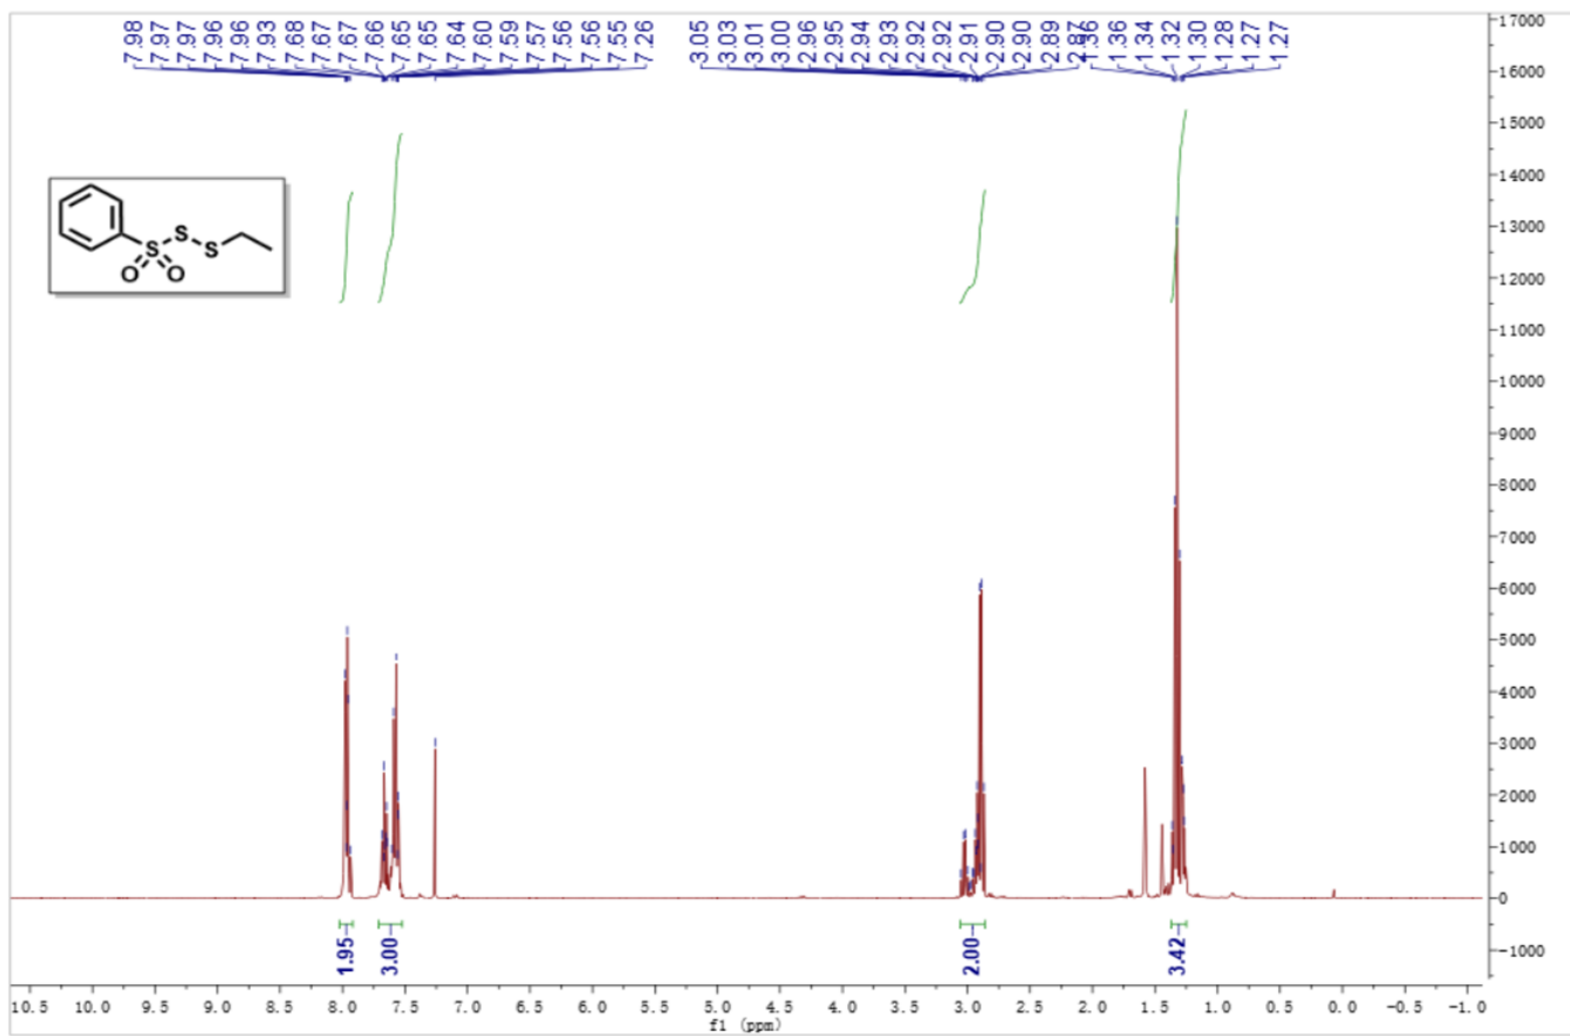

**$^{13}\text{C}$  NMR of 3r**

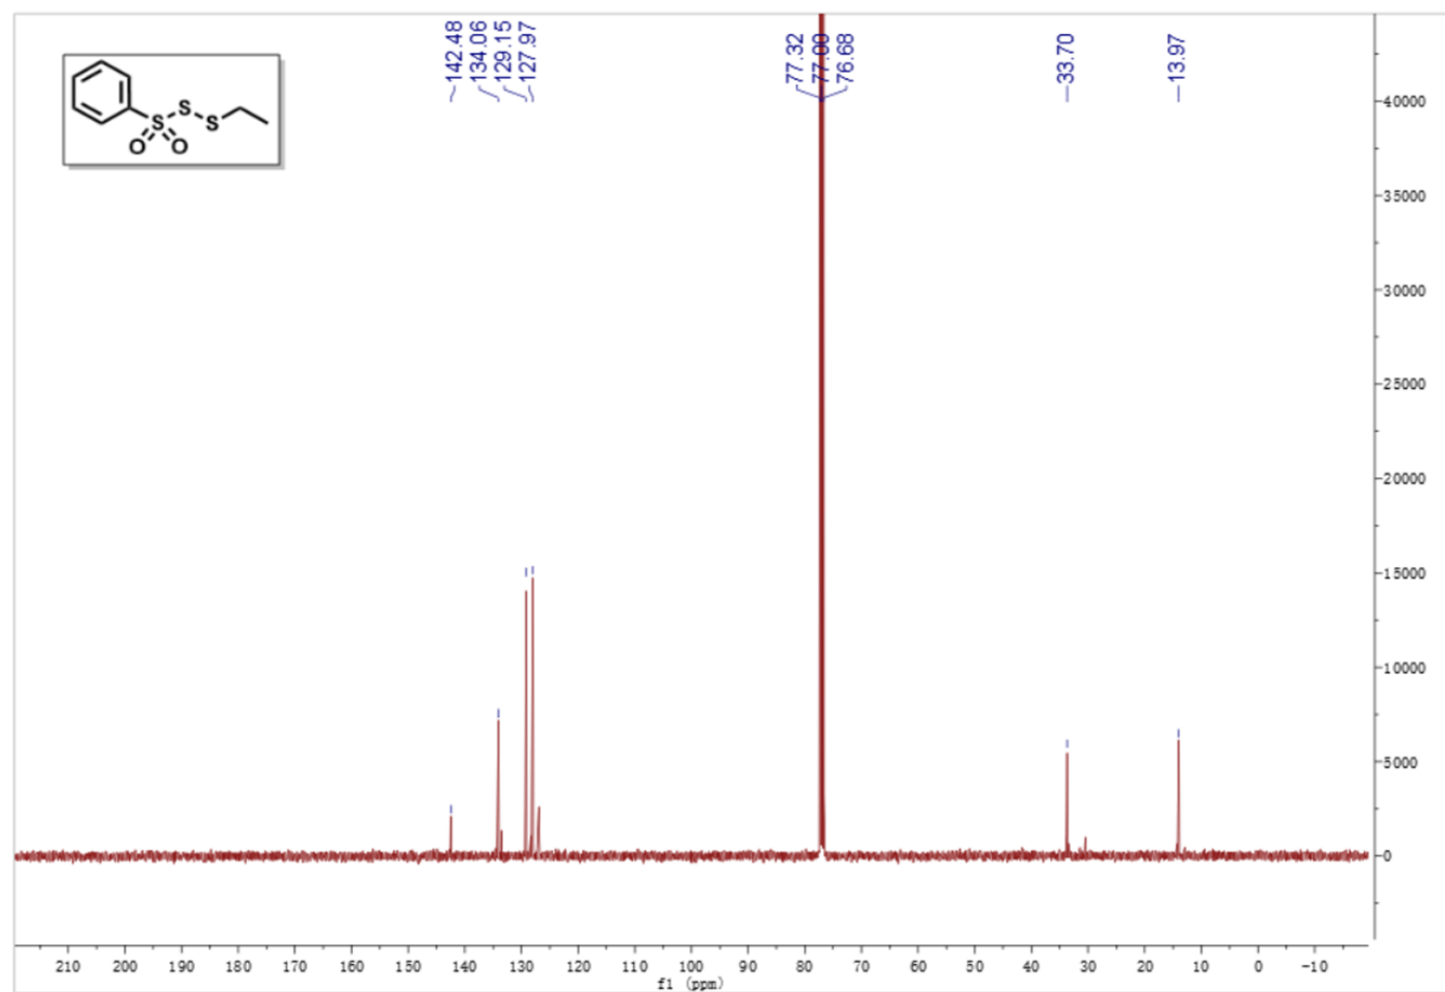

<sup>1</sup>H NMR of 3s

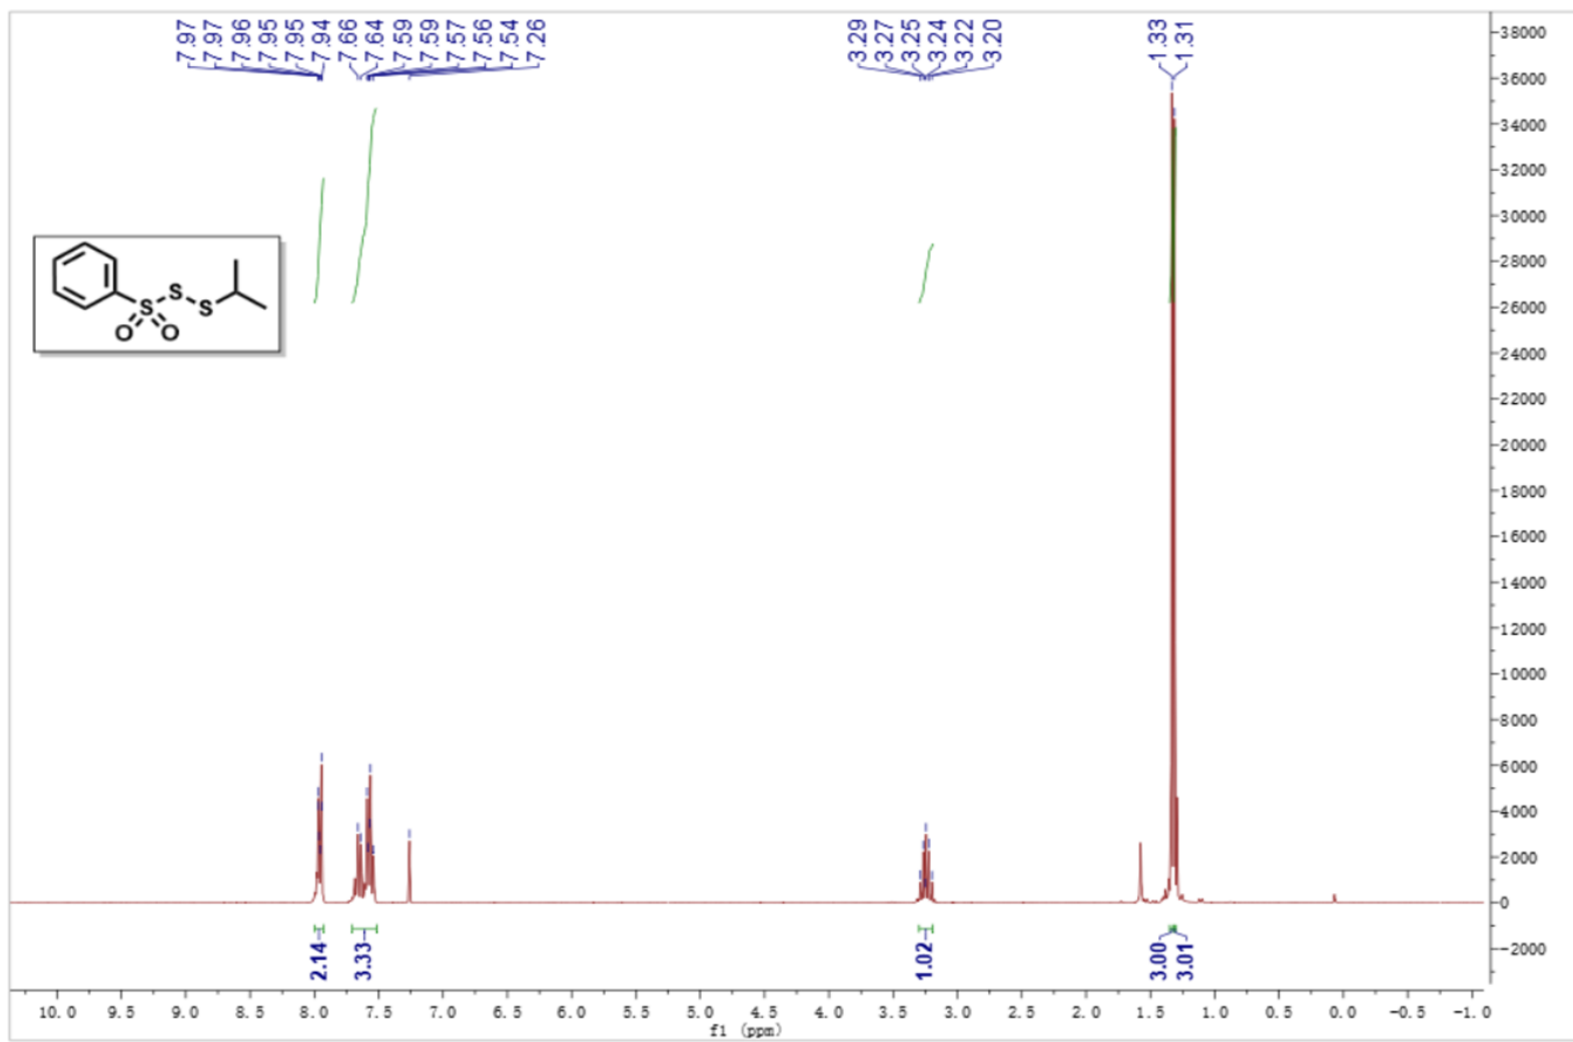



<sup>13</sup>C NMR of 3s

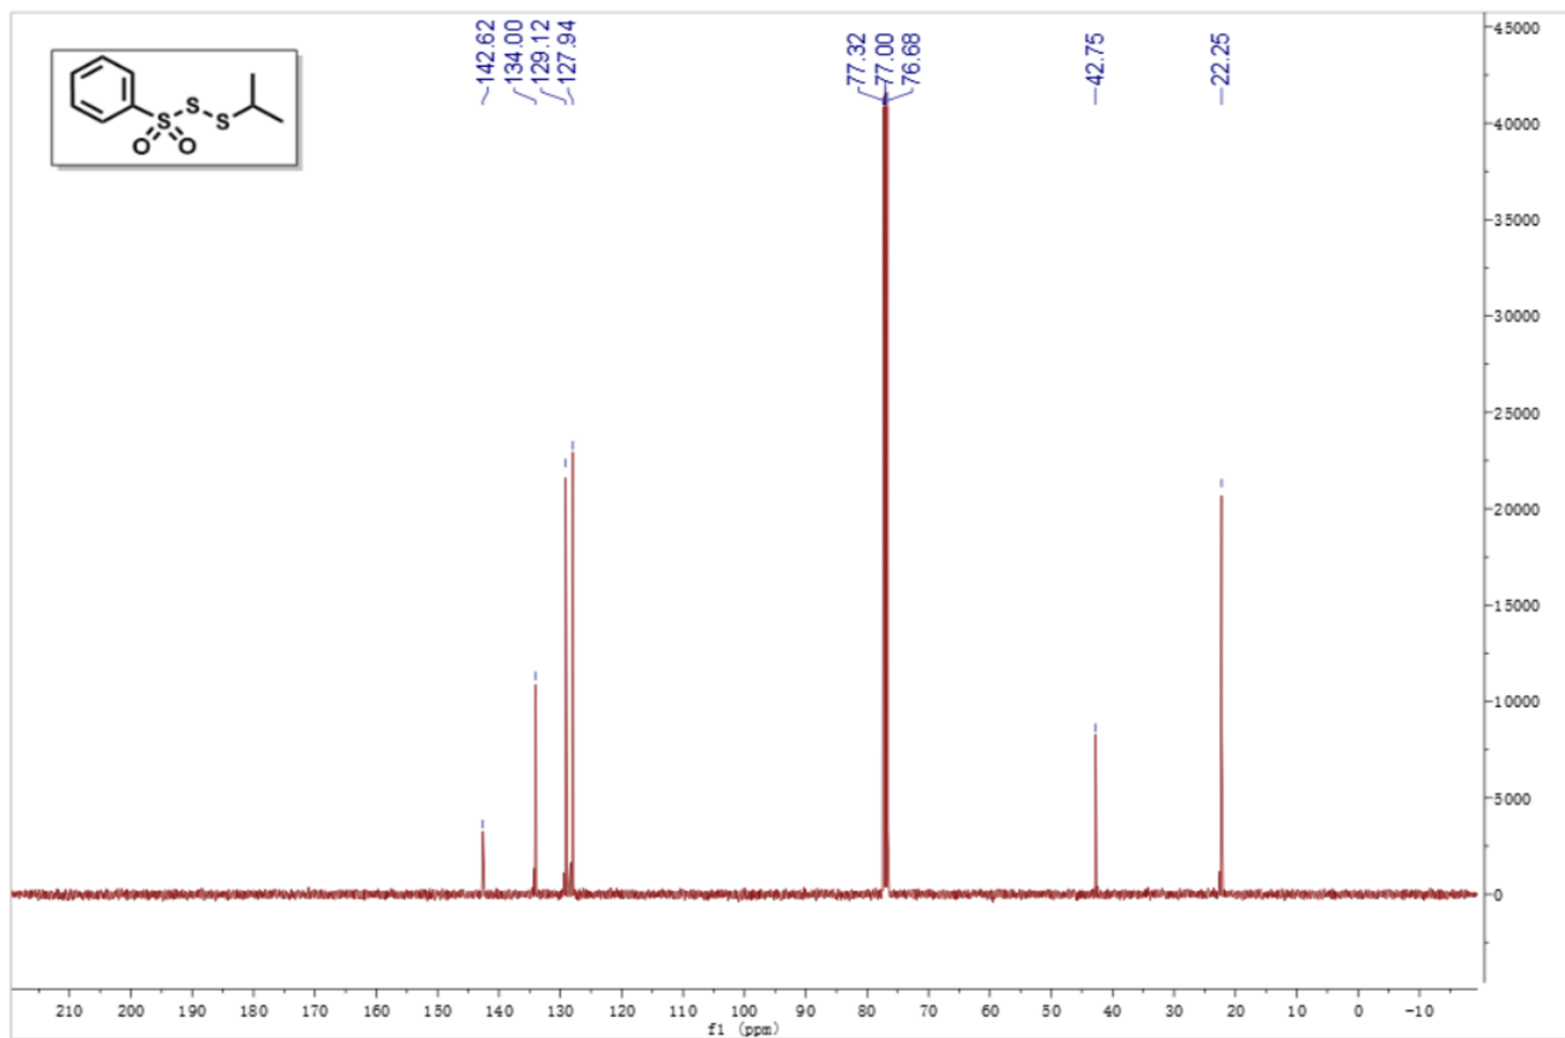

<sup>1</sup>H NMR of 3t

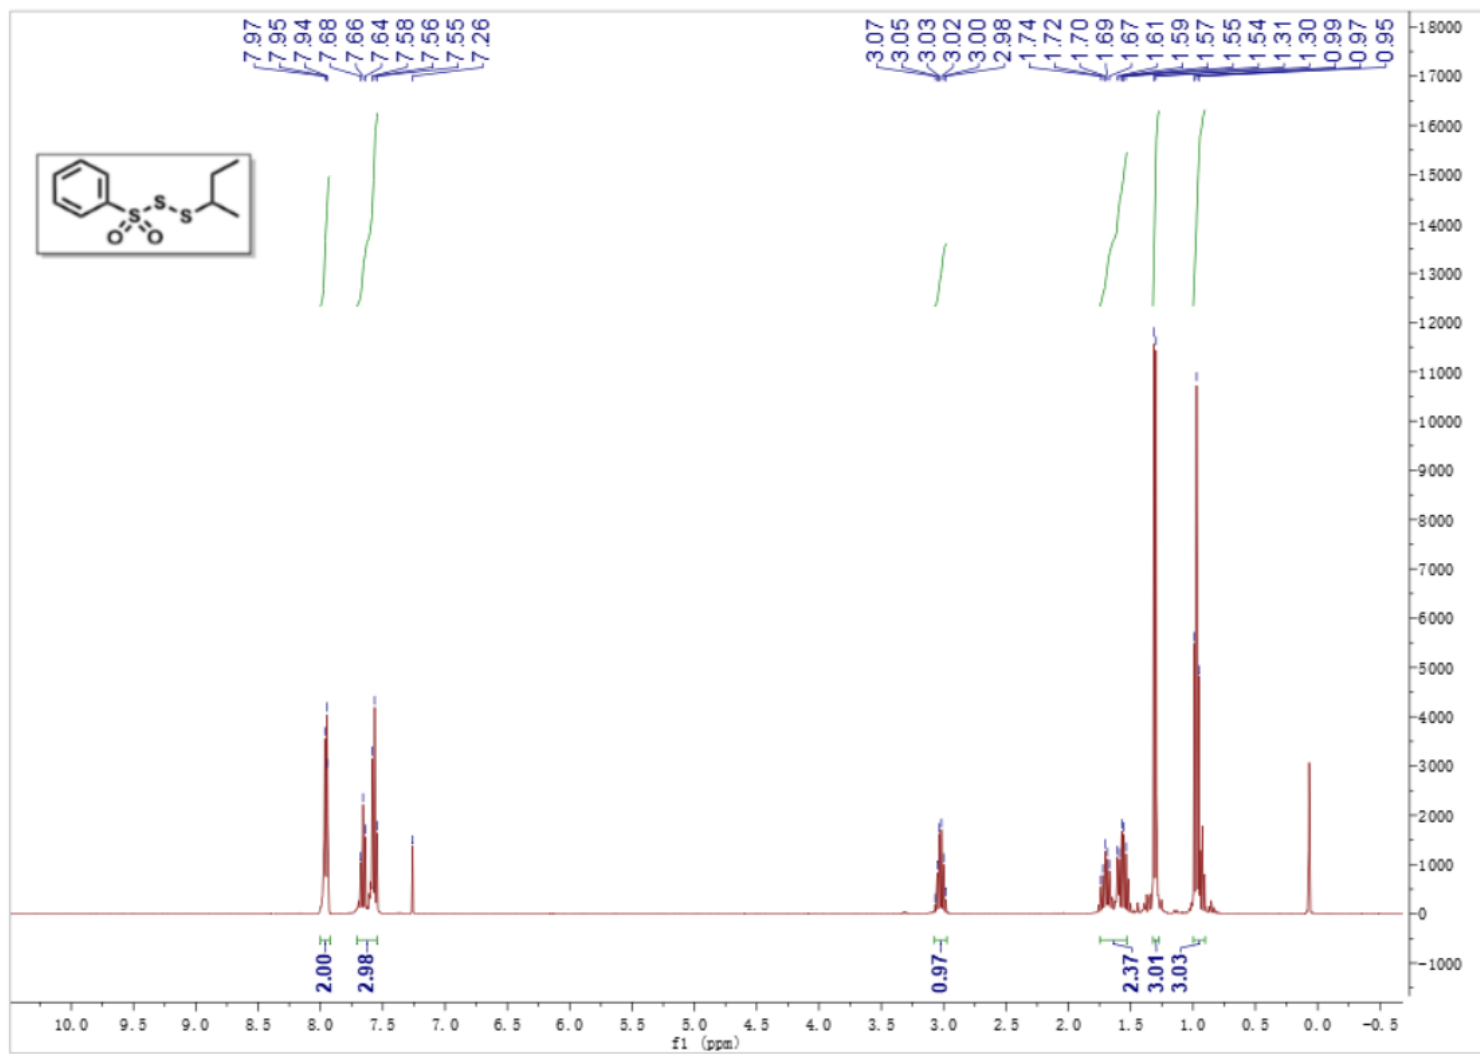

<sup>13</sup>C NMR of 3t

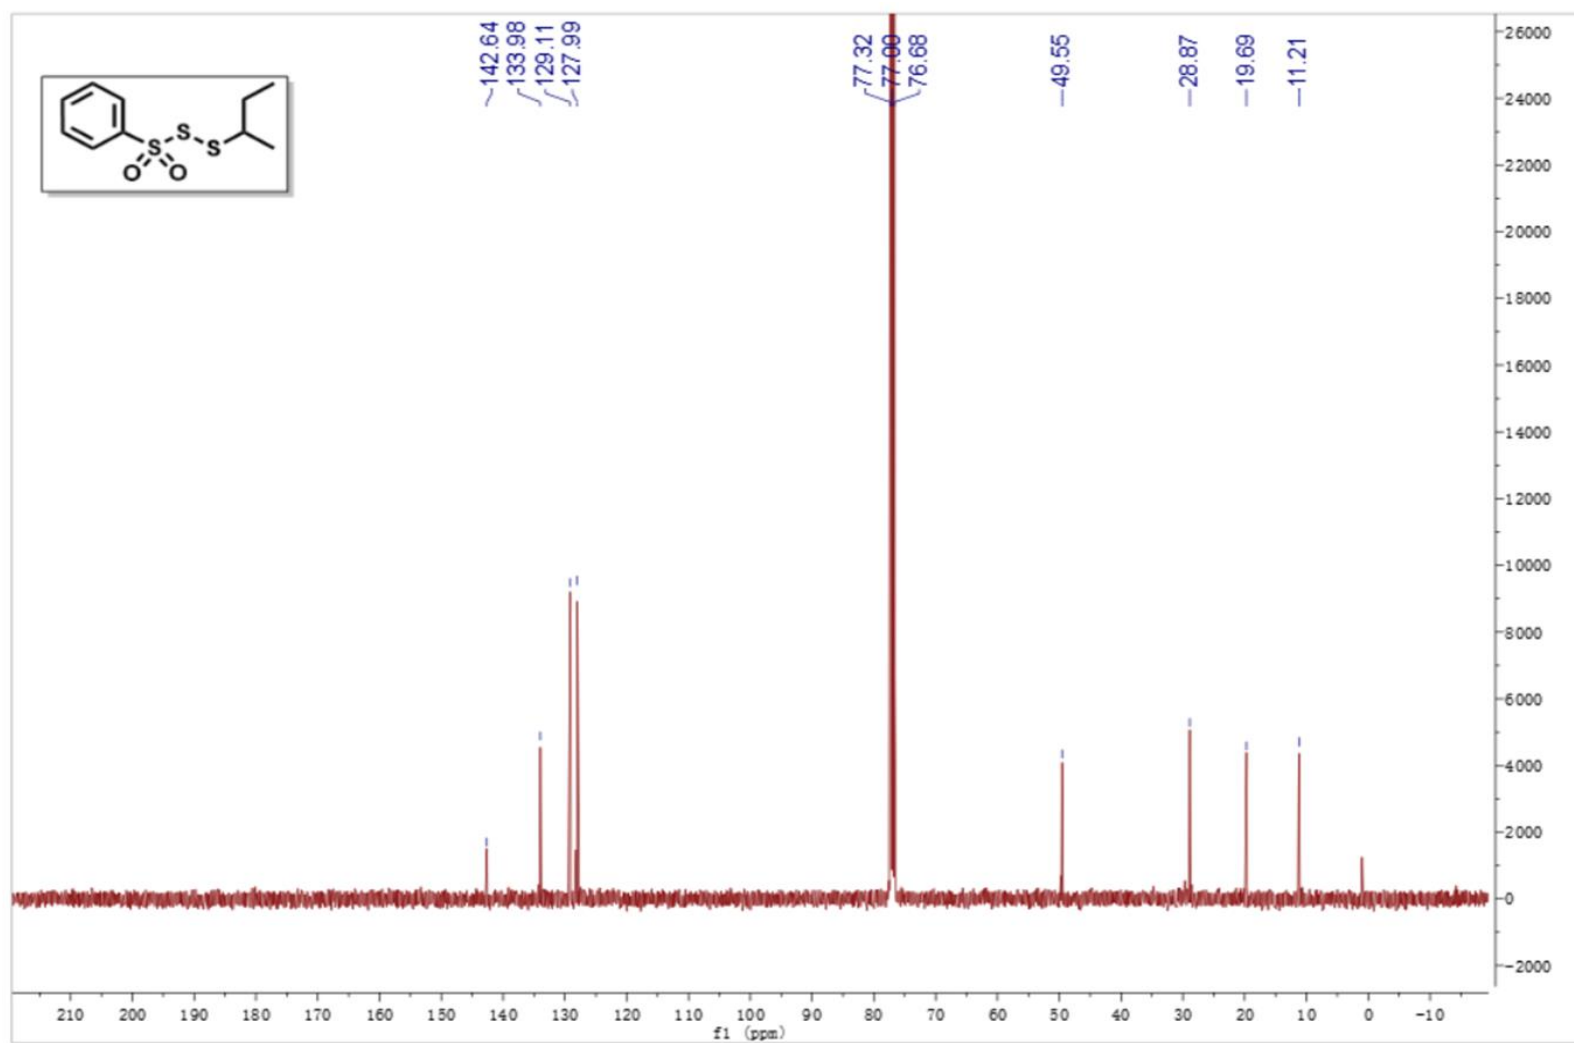

<sup>1</sup>H NMR of 3u

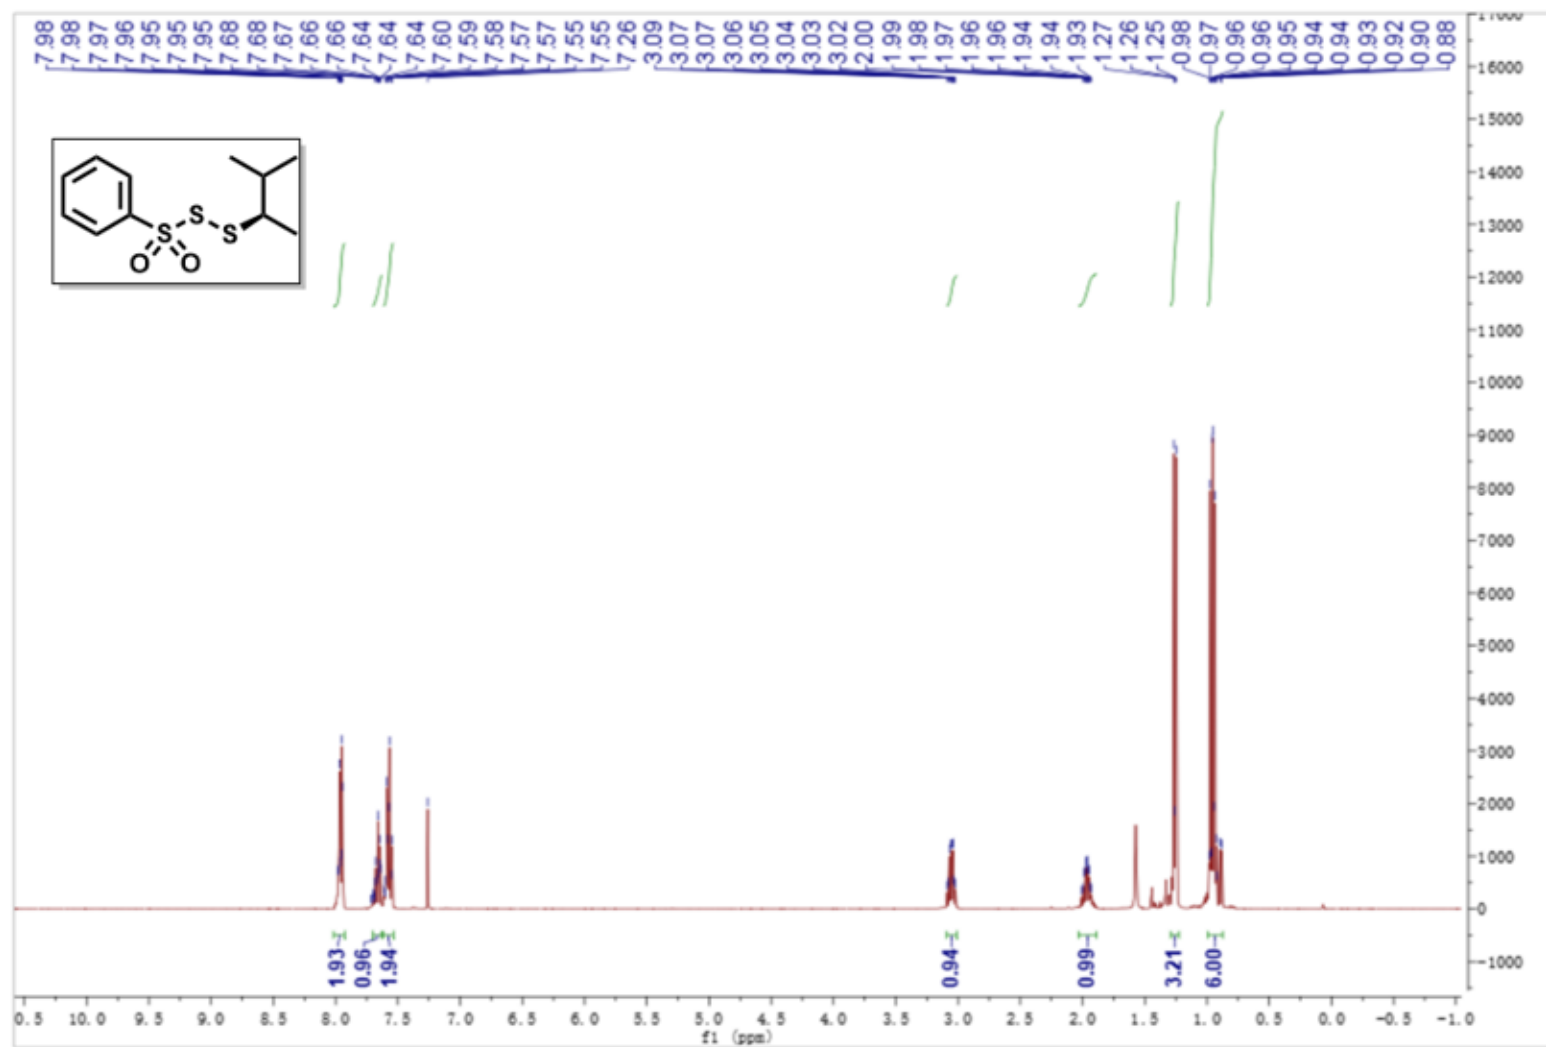

<sup>13</sup>C NMR of 3u

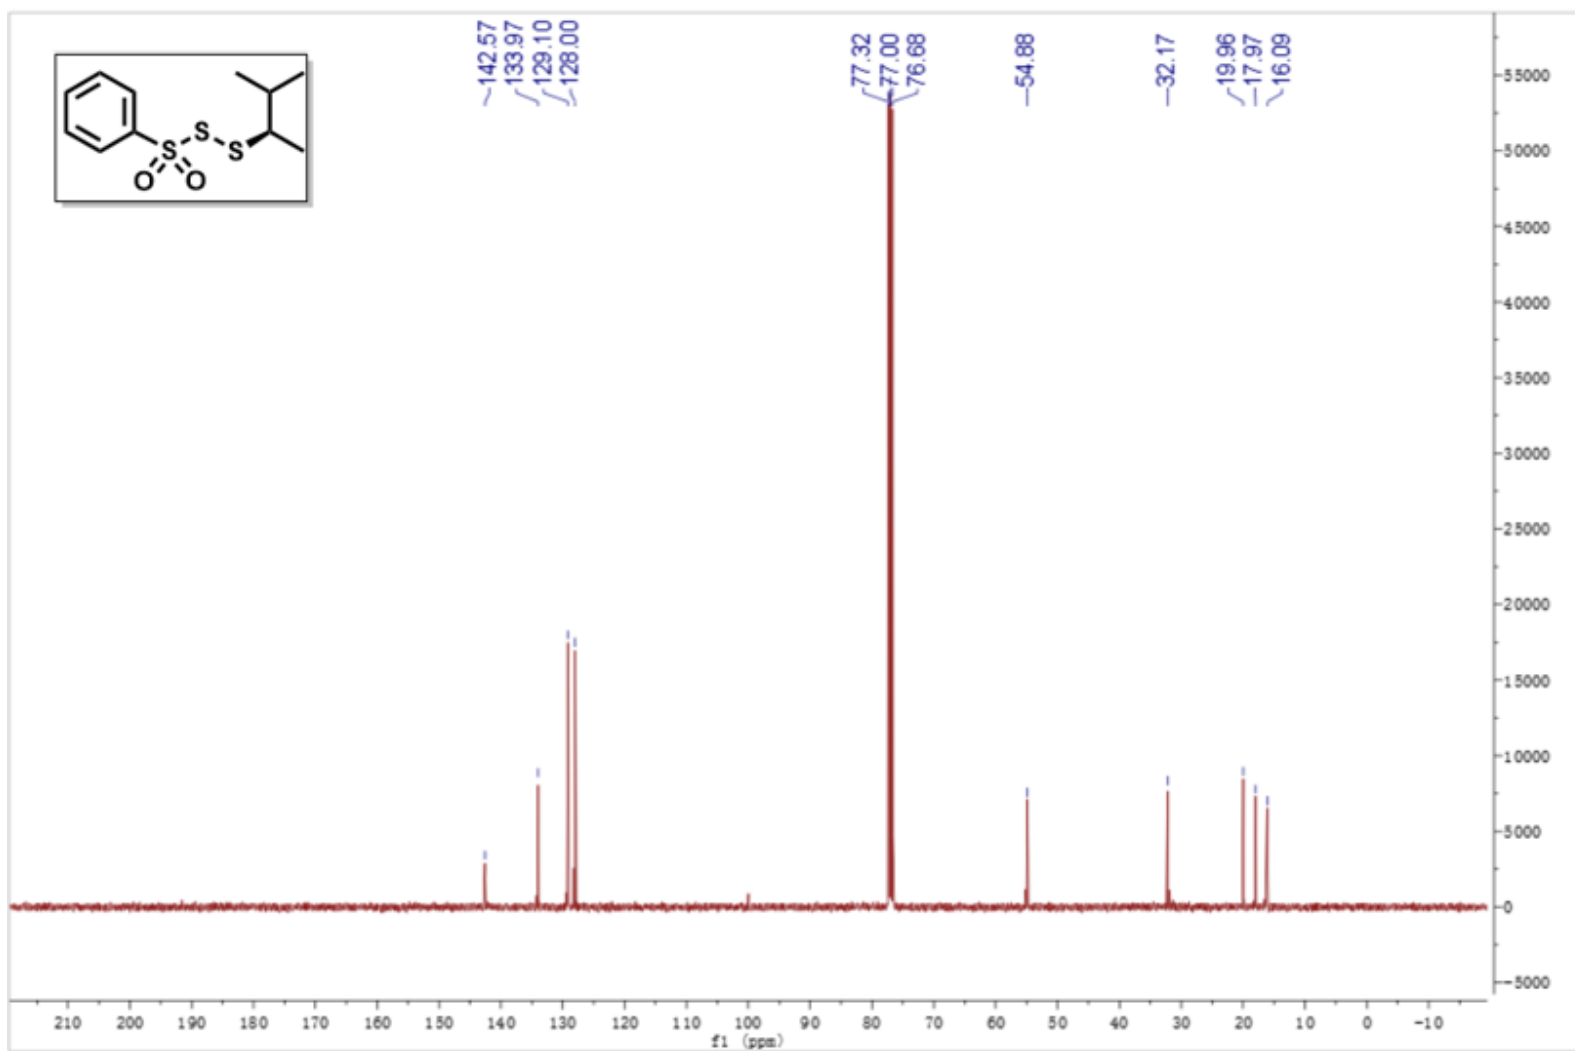

<sup>1</sup>H NMR of 3v

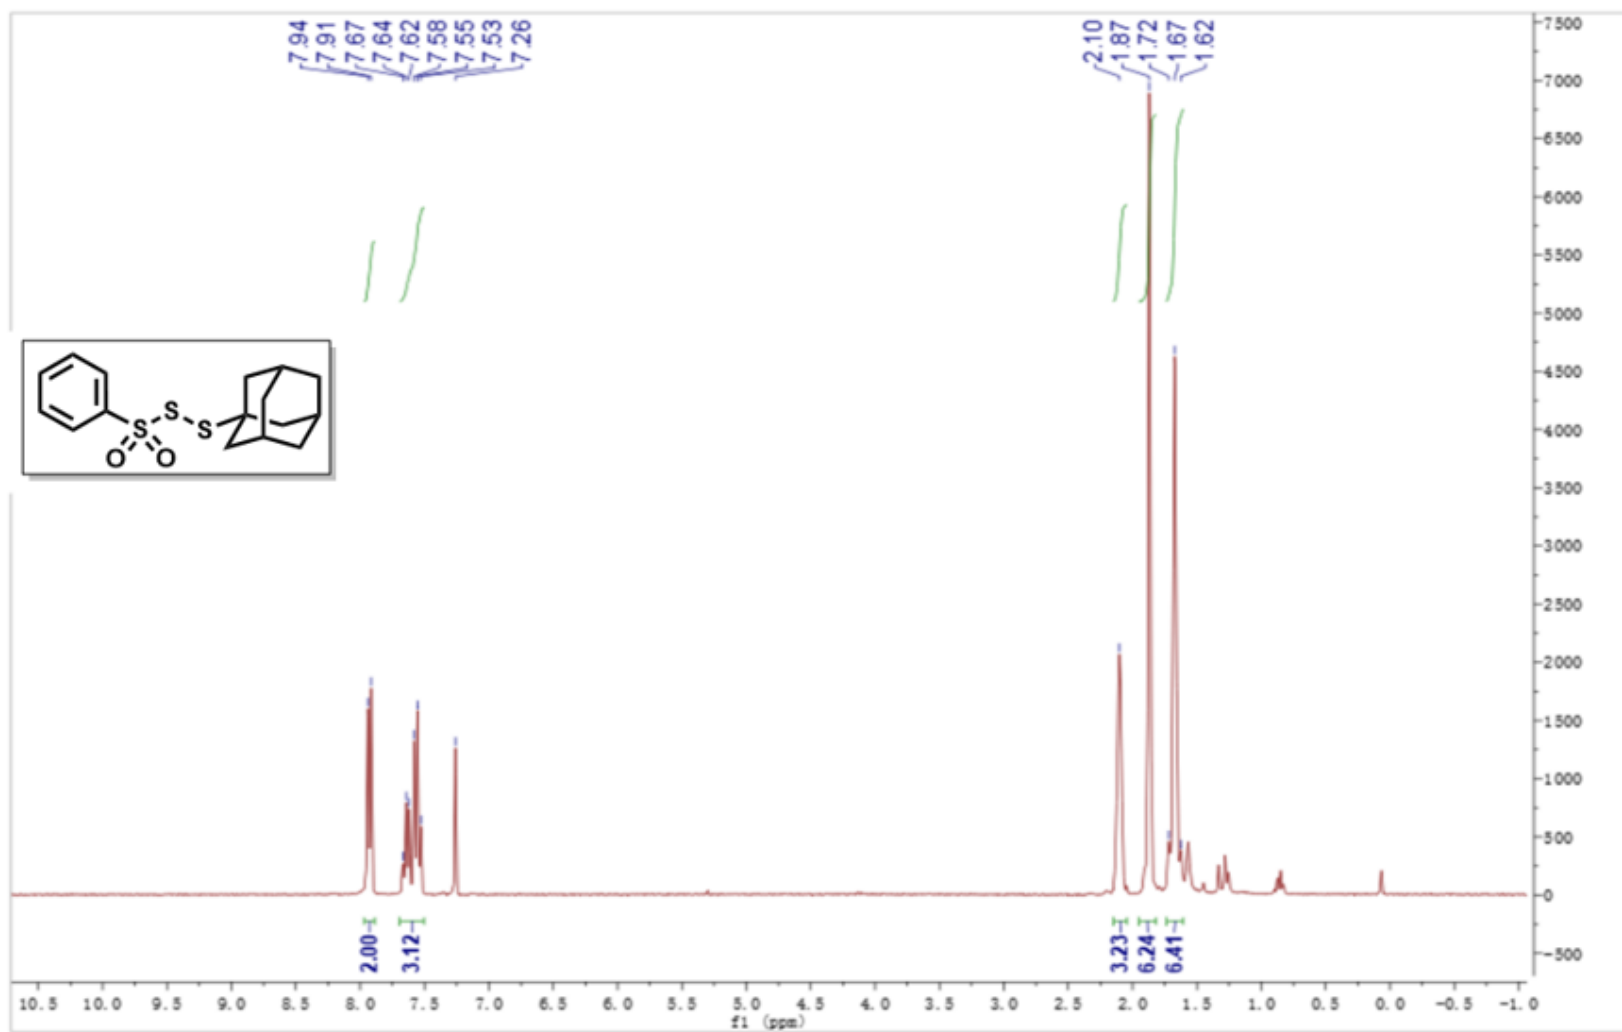

<sup>13</sup>C NMR of 3v

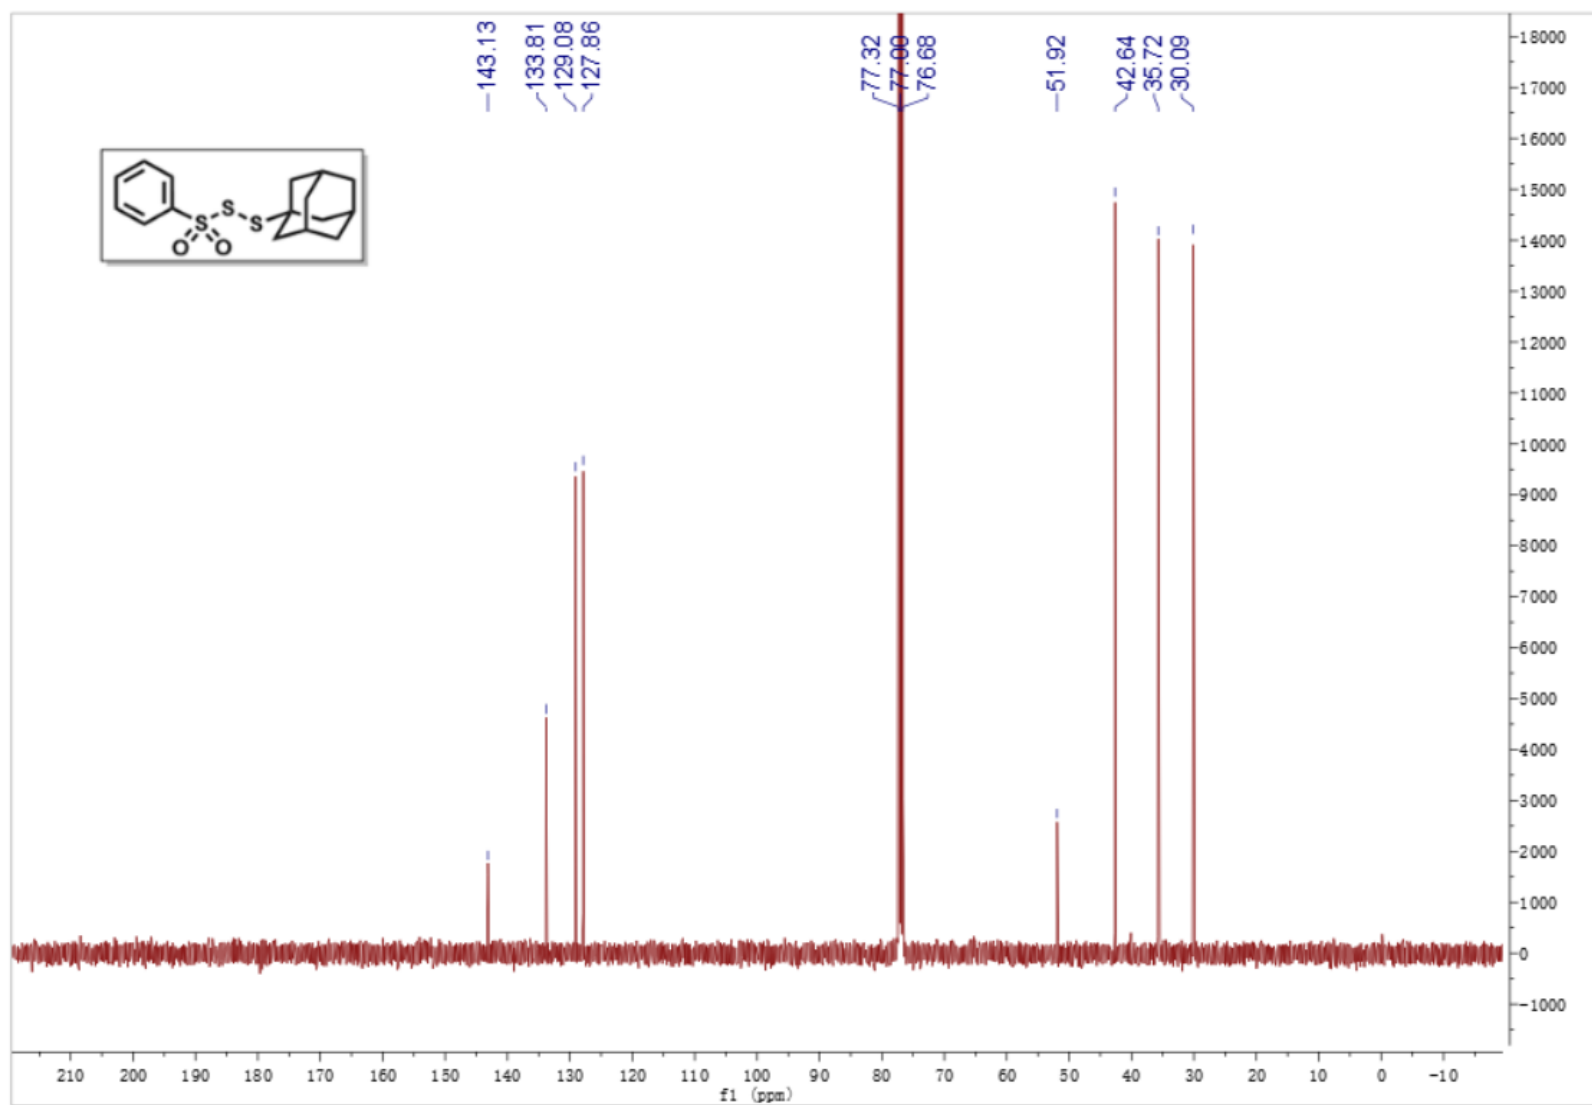

<sup>1</sup>H NMR of 3w

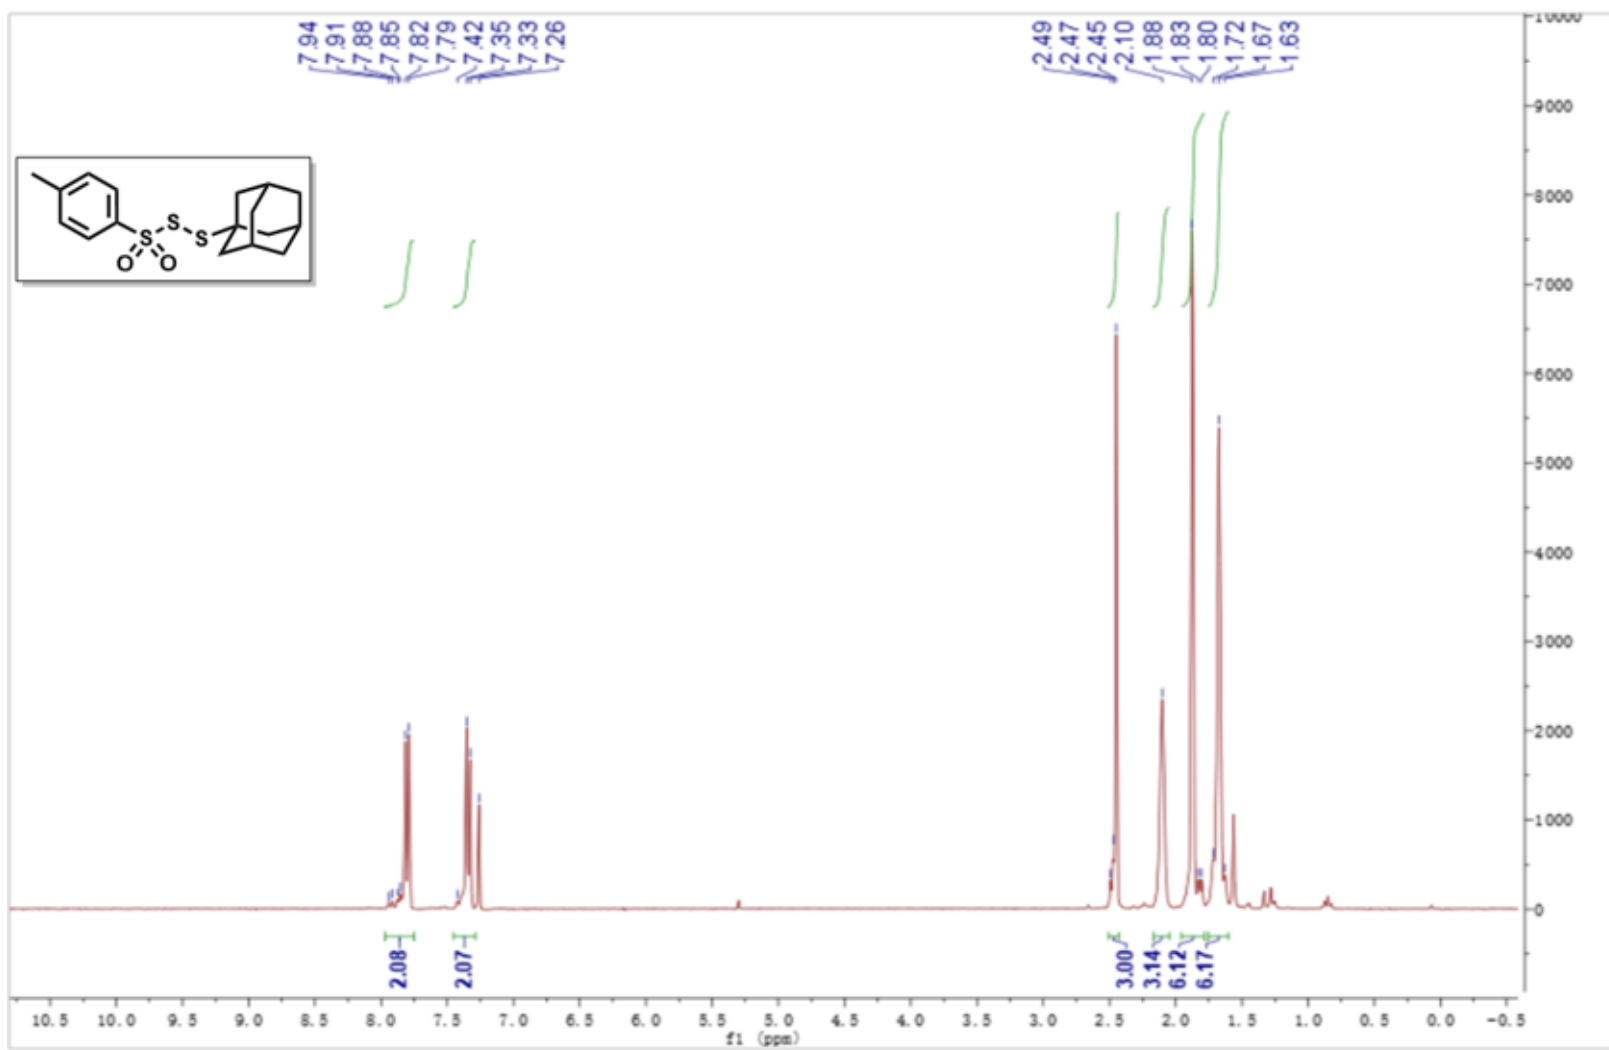



<sup>13</sup>C NMR of 3w

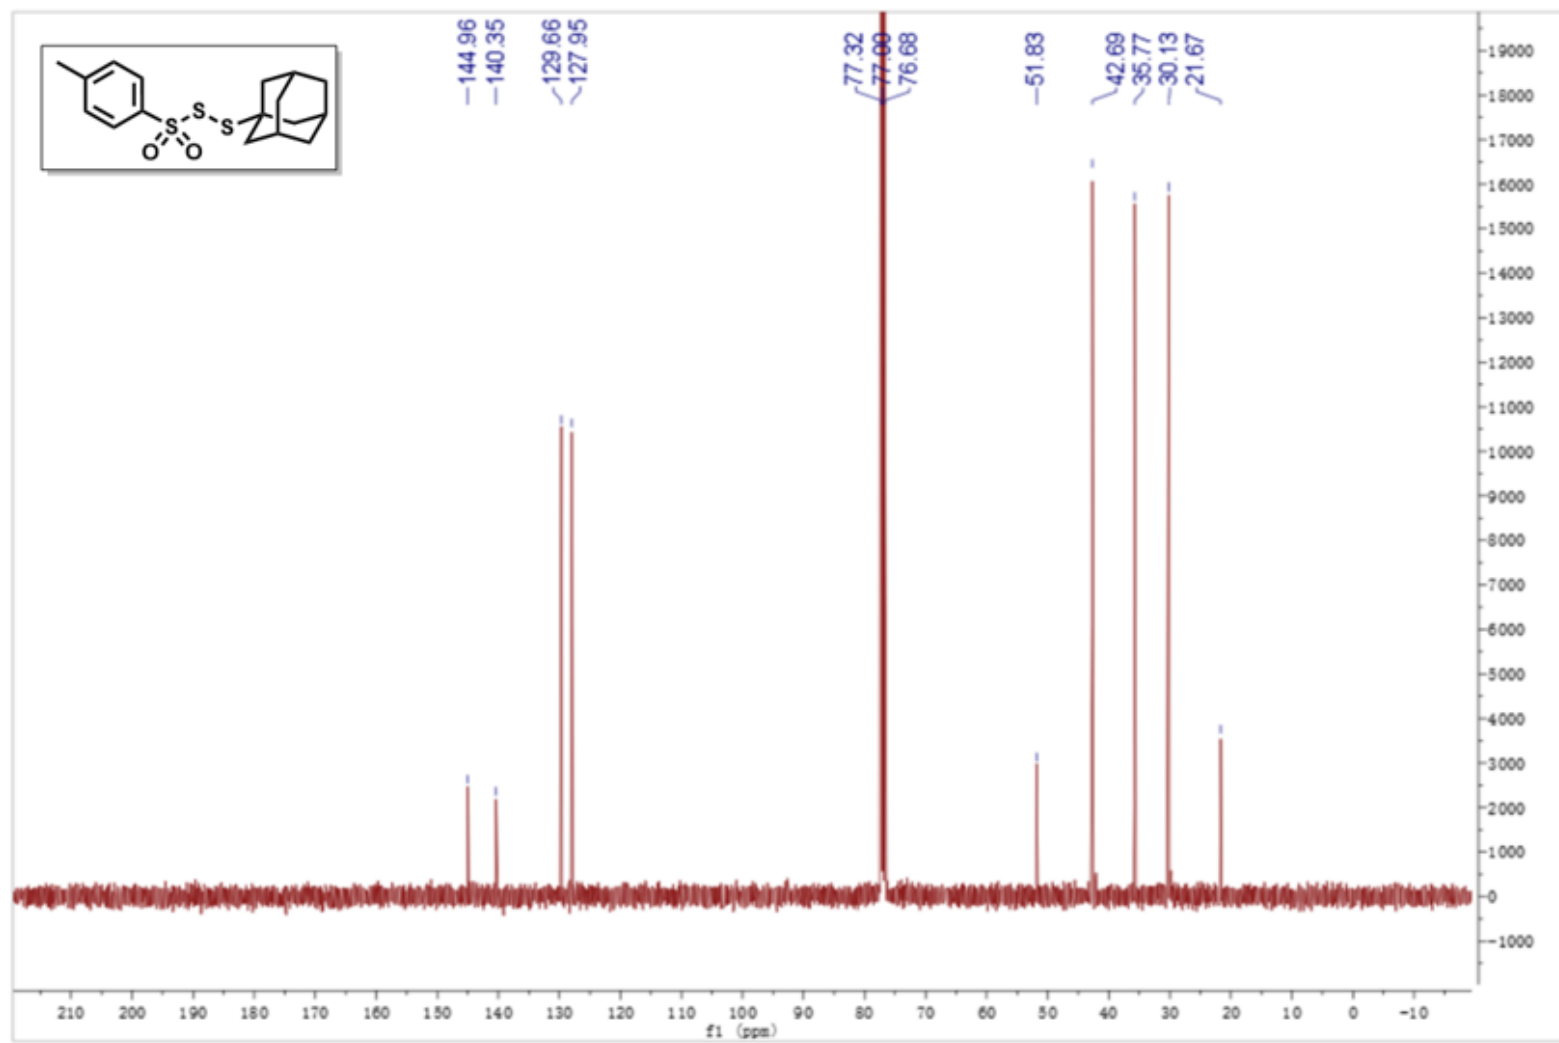

<sup>1</sup>H NMR of 3x

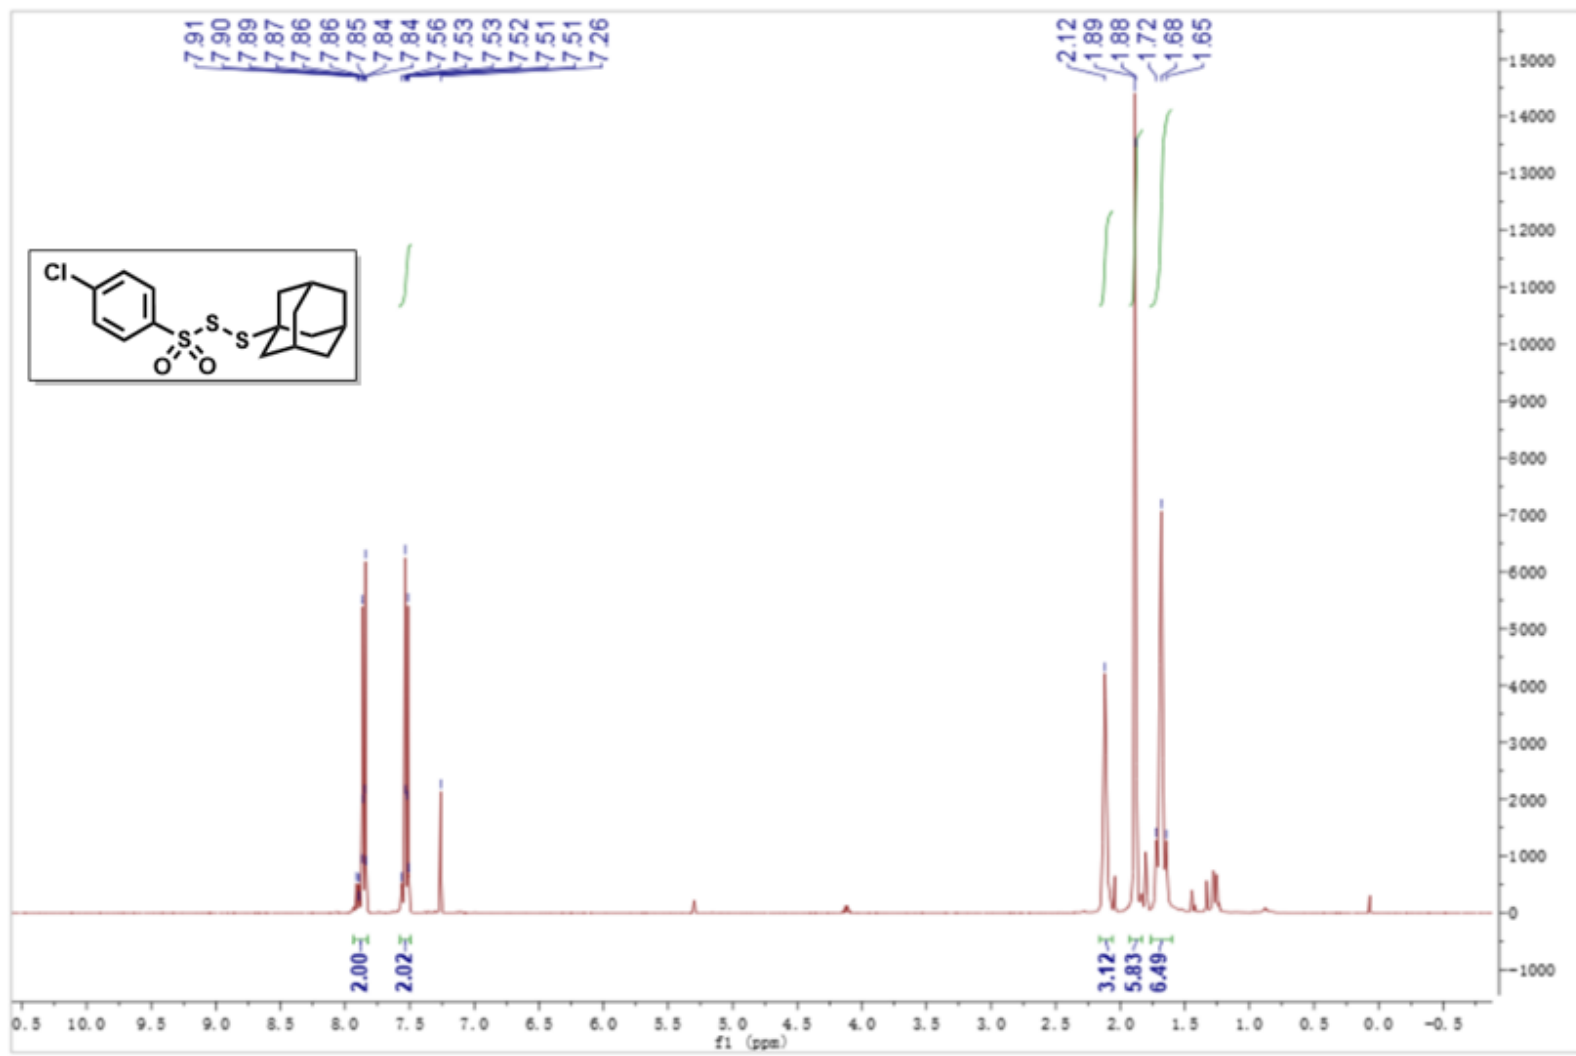

**$^{13}\text{C}$  NMR of 3x**

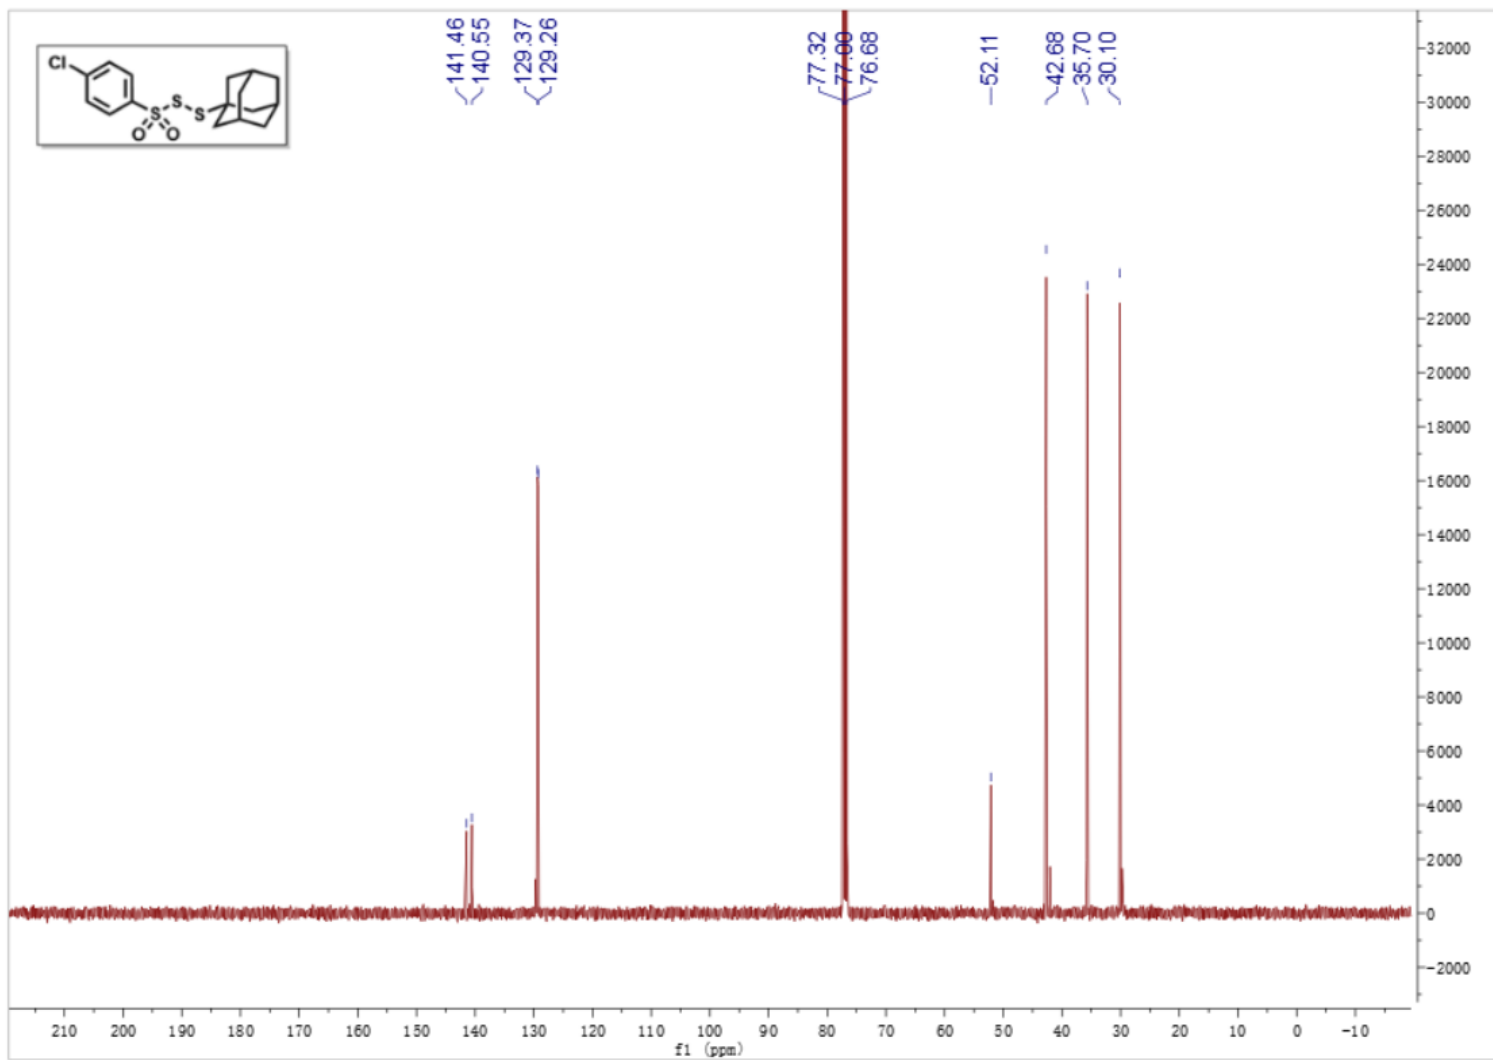

<sup>1</sup>H NMR of 3y

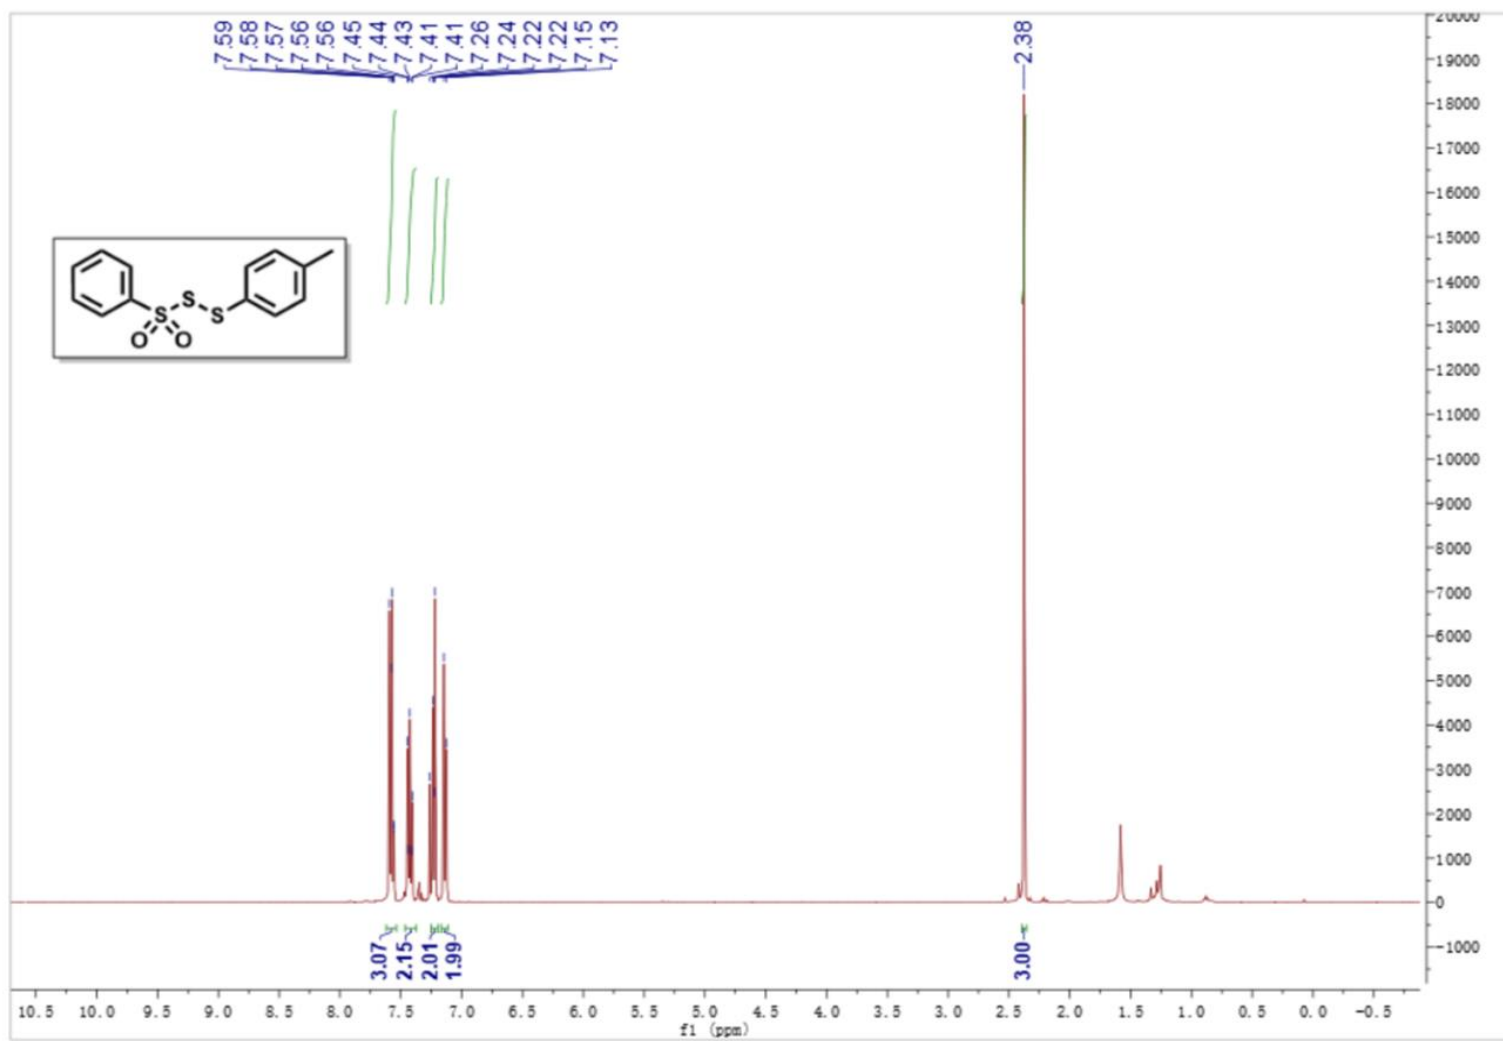

**$^{13}\text{C}$  NMR of 3y**

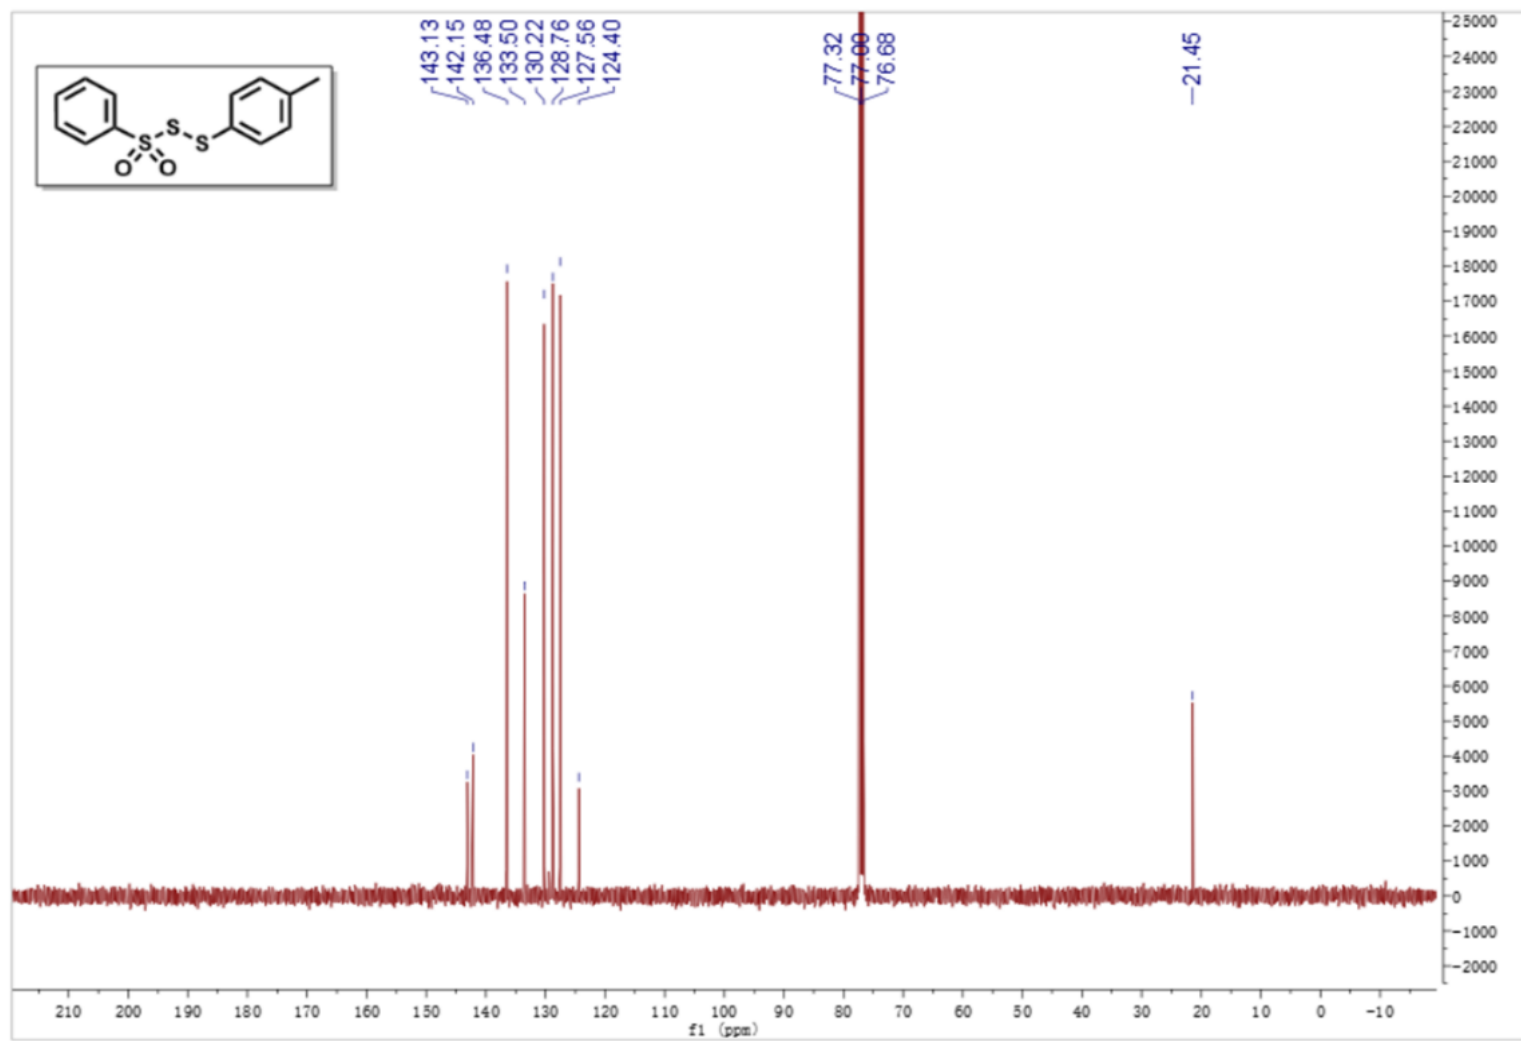

<sup>1</sup>H NMR of 3z

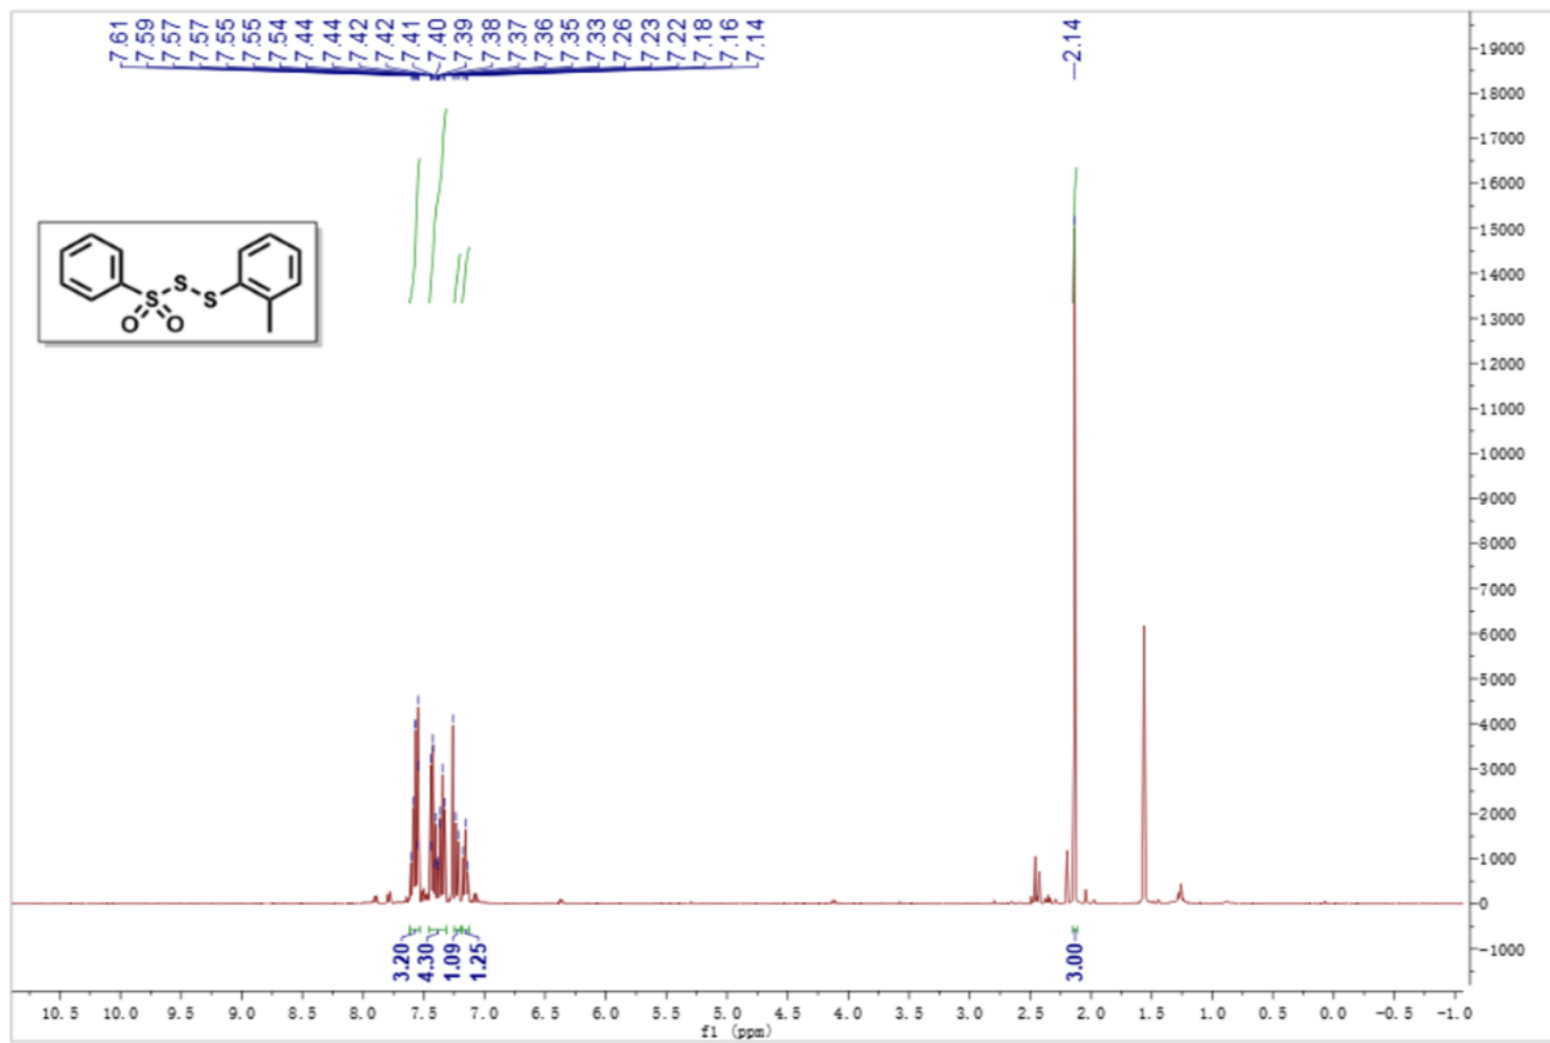

<sup>13</sup>C NMR of 3z

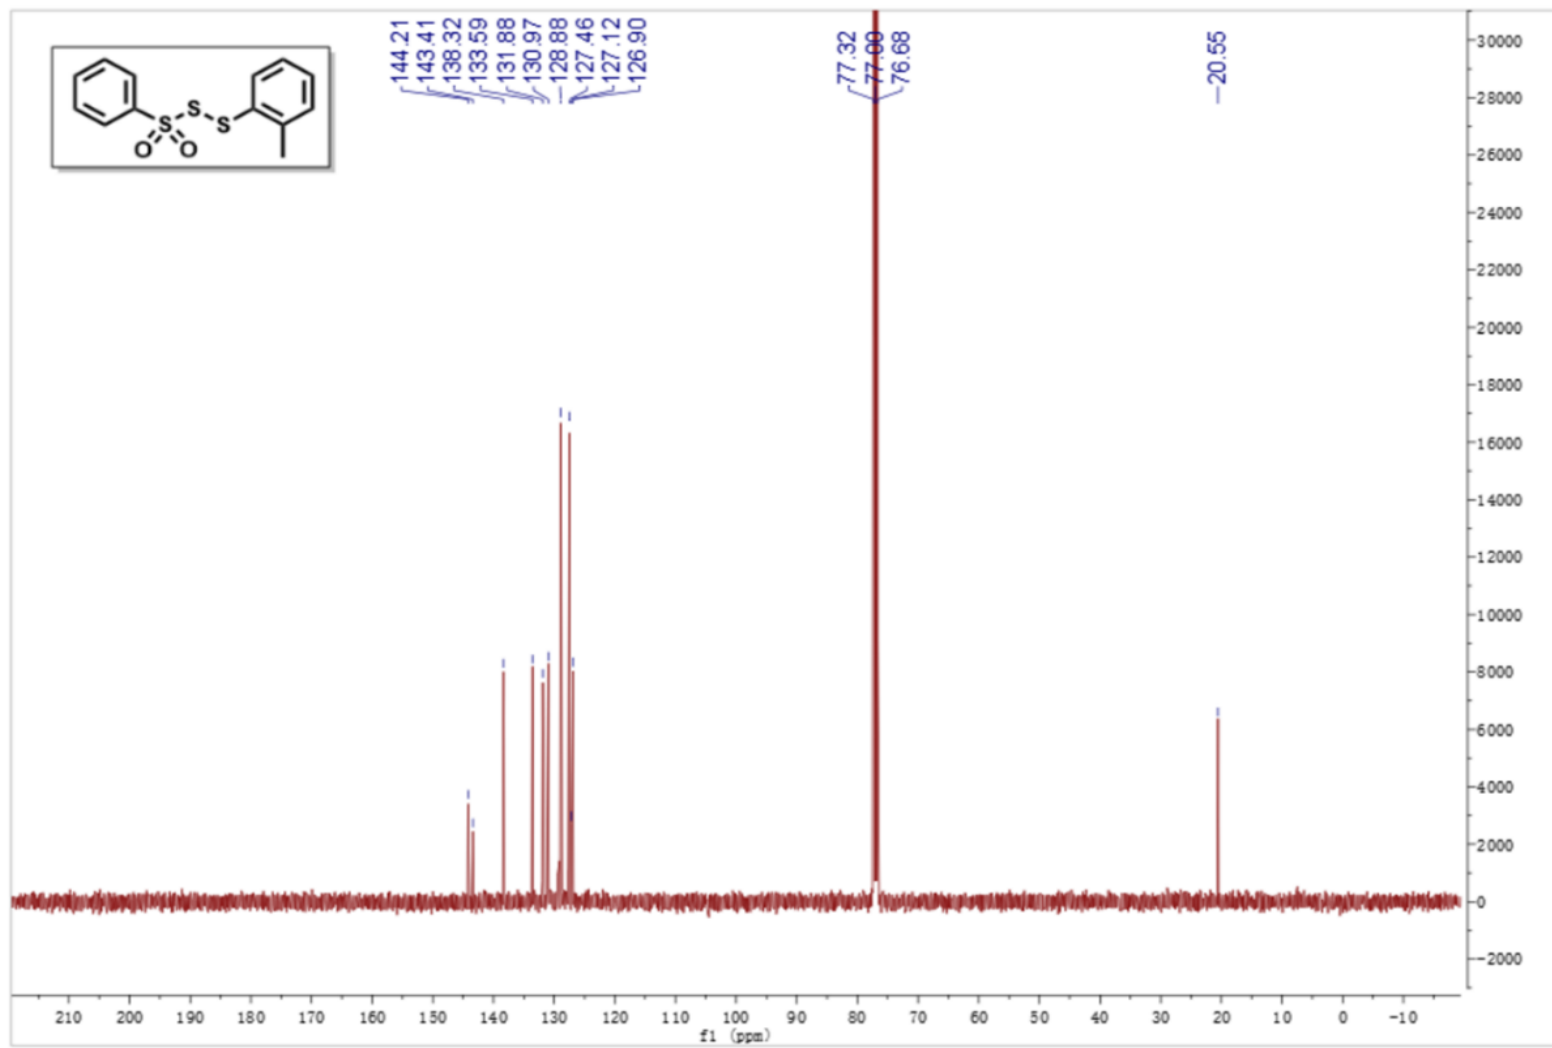

**<sup>1</sup>H NMR of 3aa**

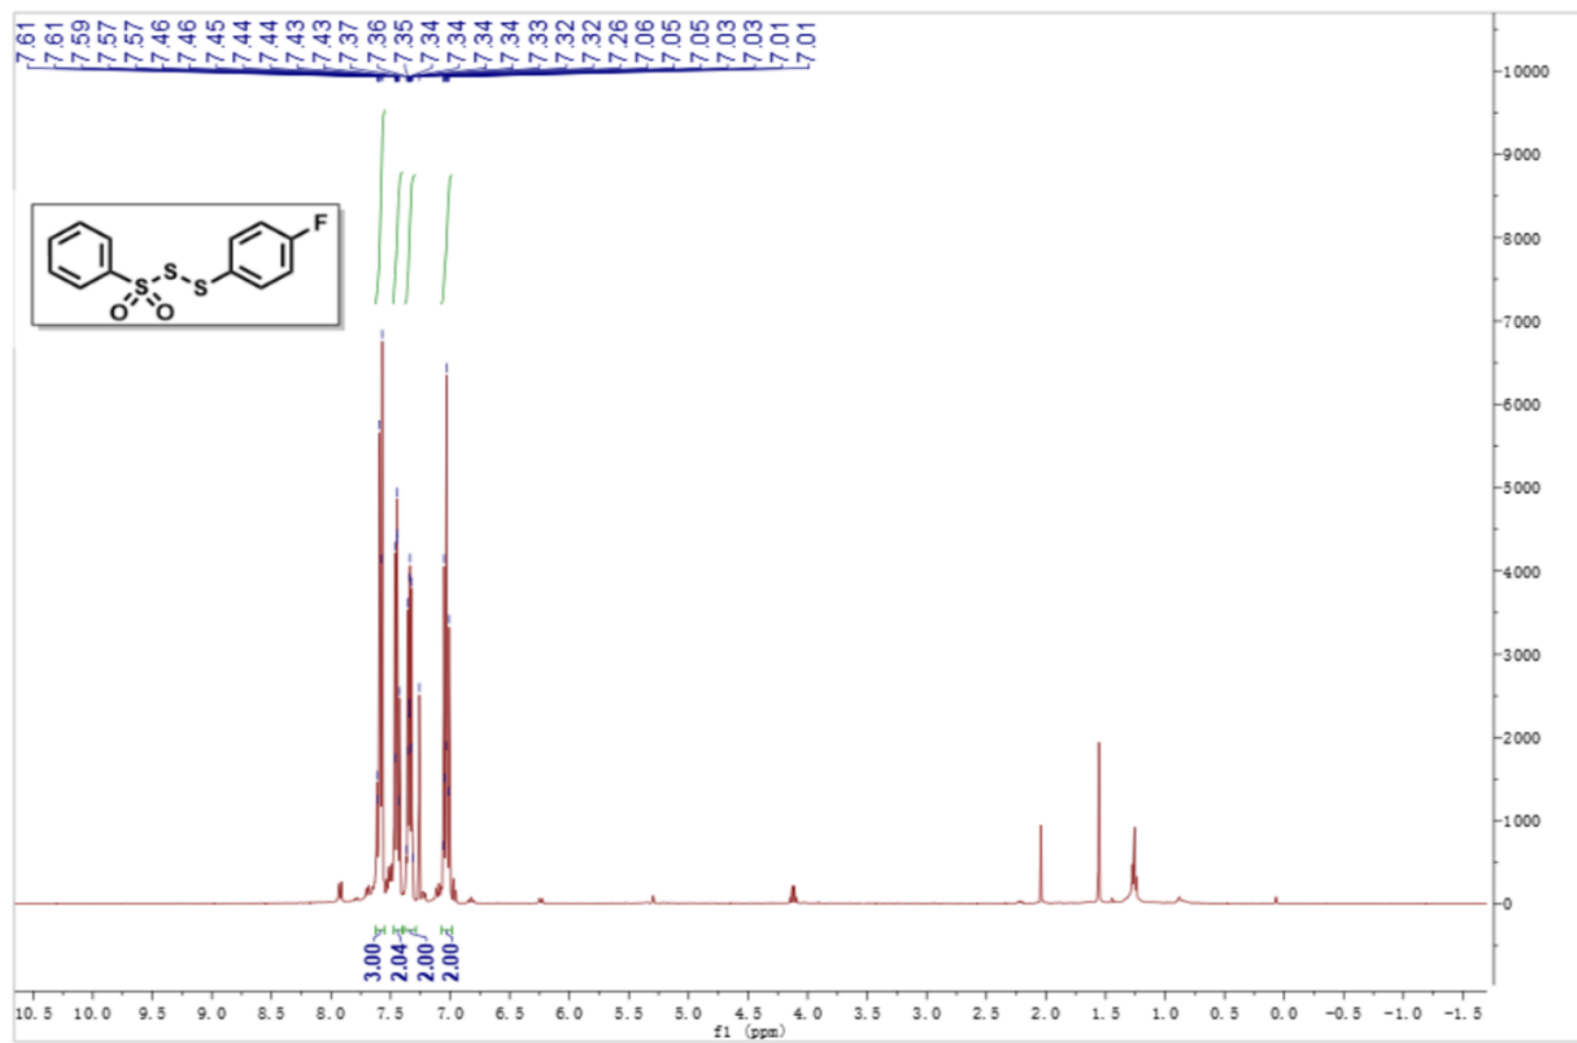



**<sup>13</sup>C NMR of 3aa**

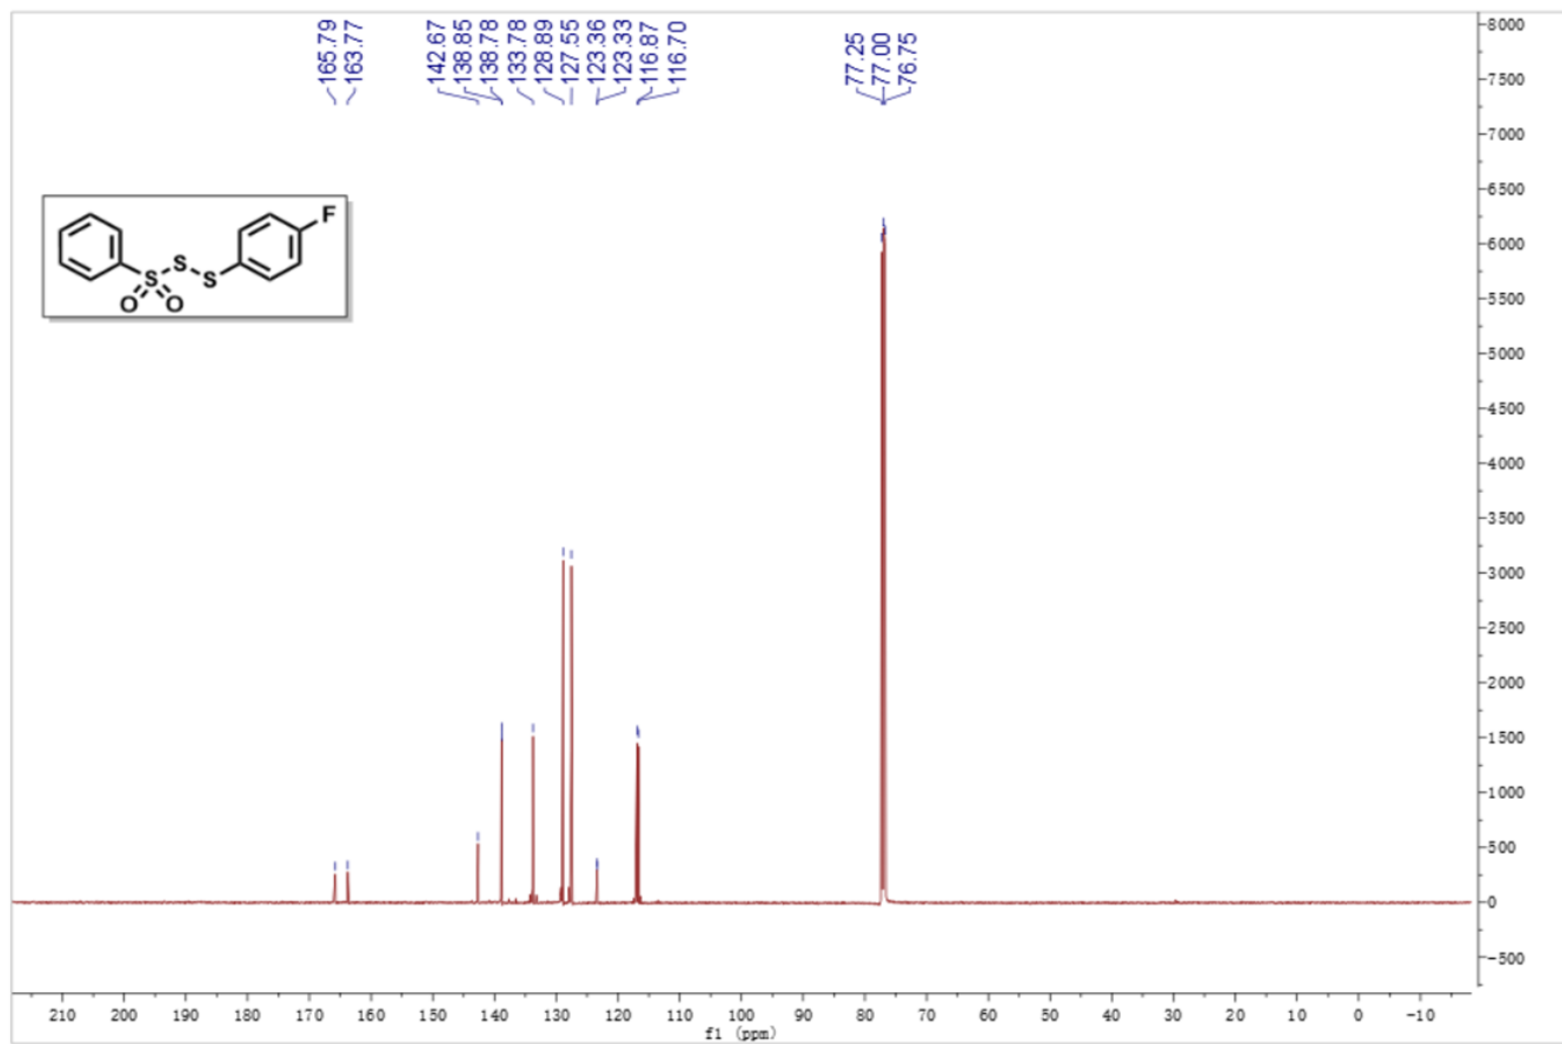

**$^{19}\text{F}$  NMR of 3aa**

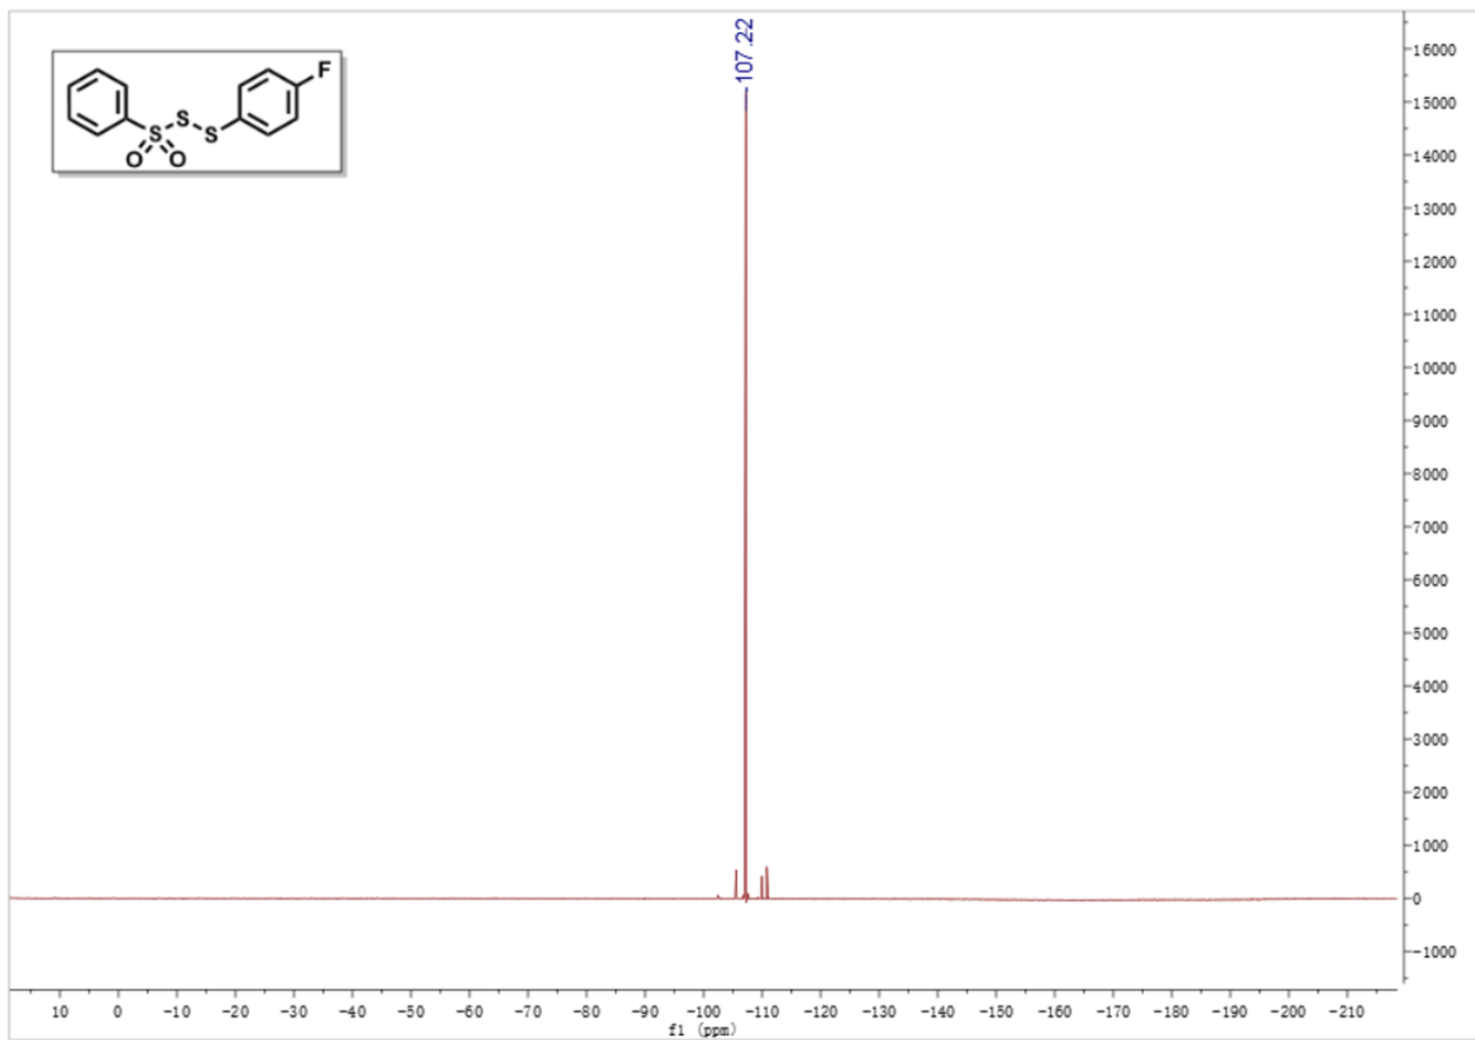

<sup>1</sup>H NMR of 3ab

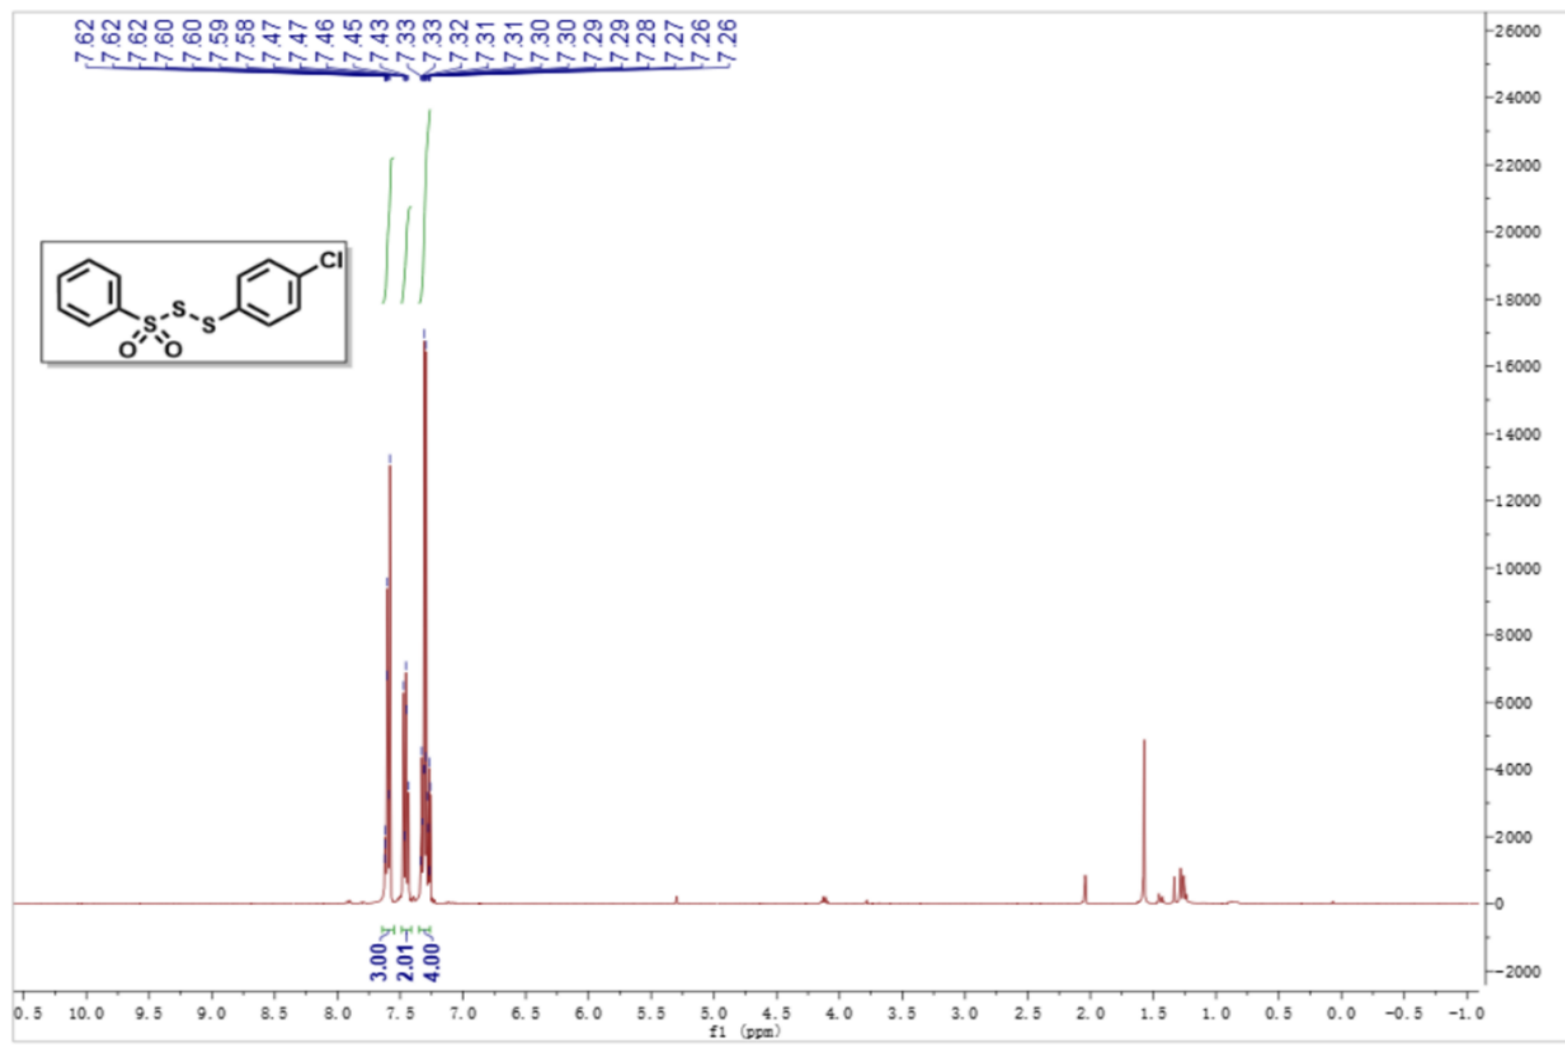

<sup>13</sup>C NMR of 3ab

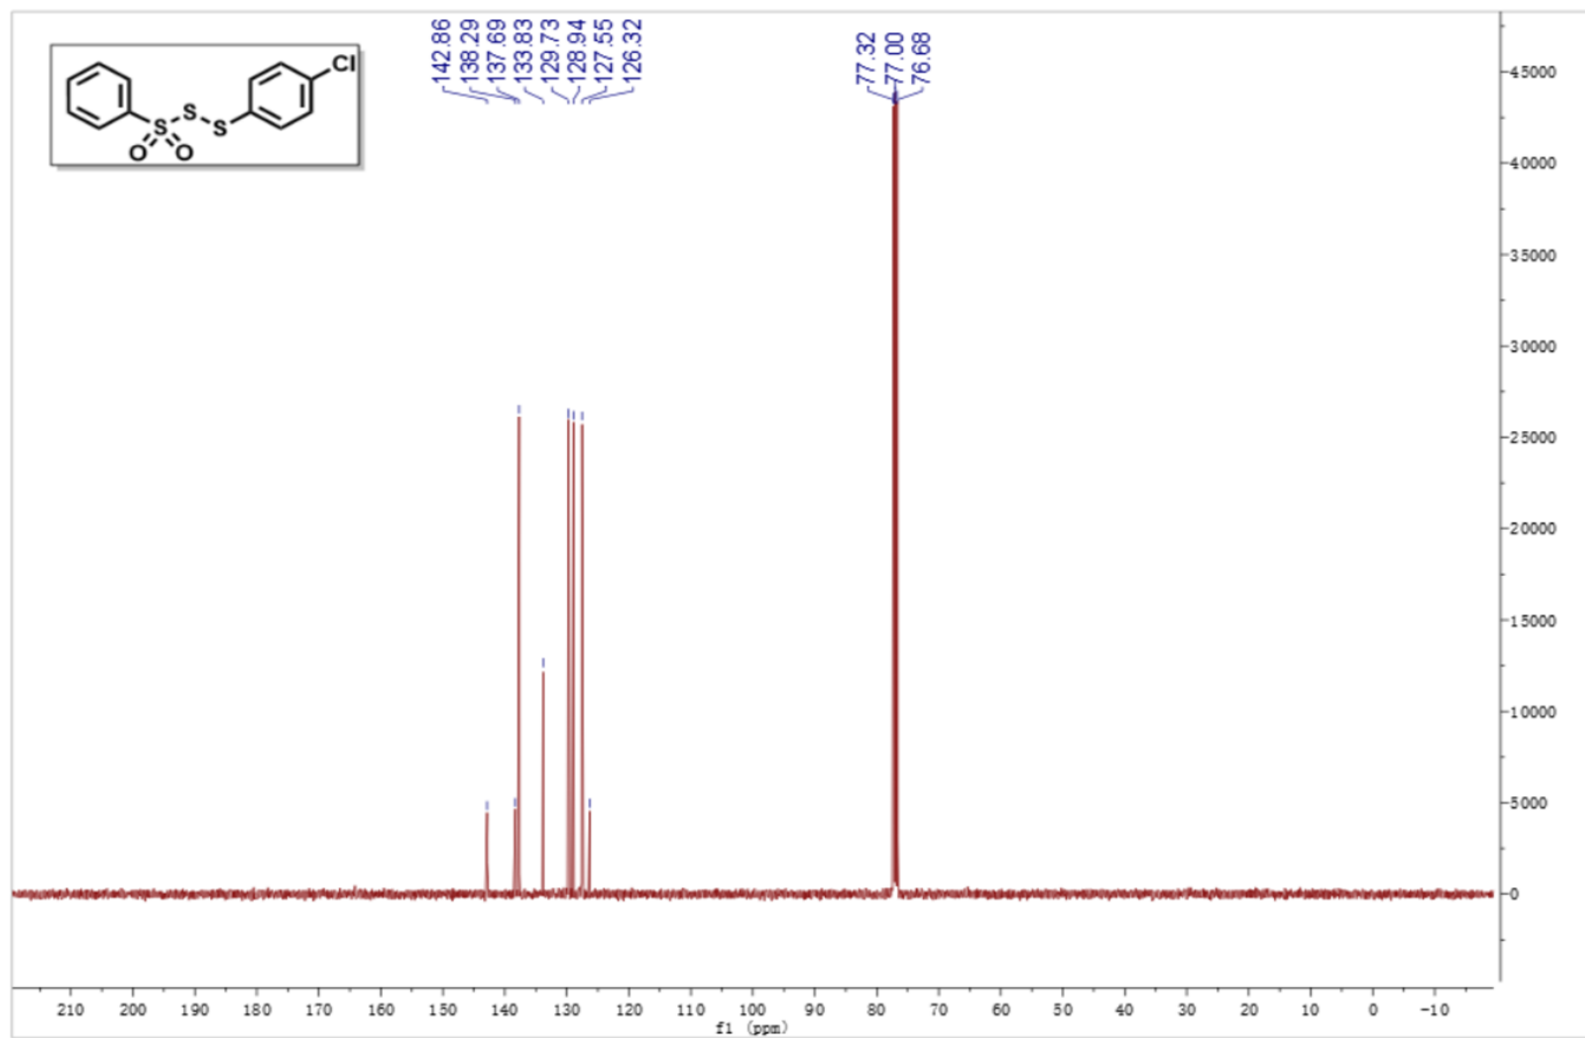

<sup>1</sup>H NMR of 3ac

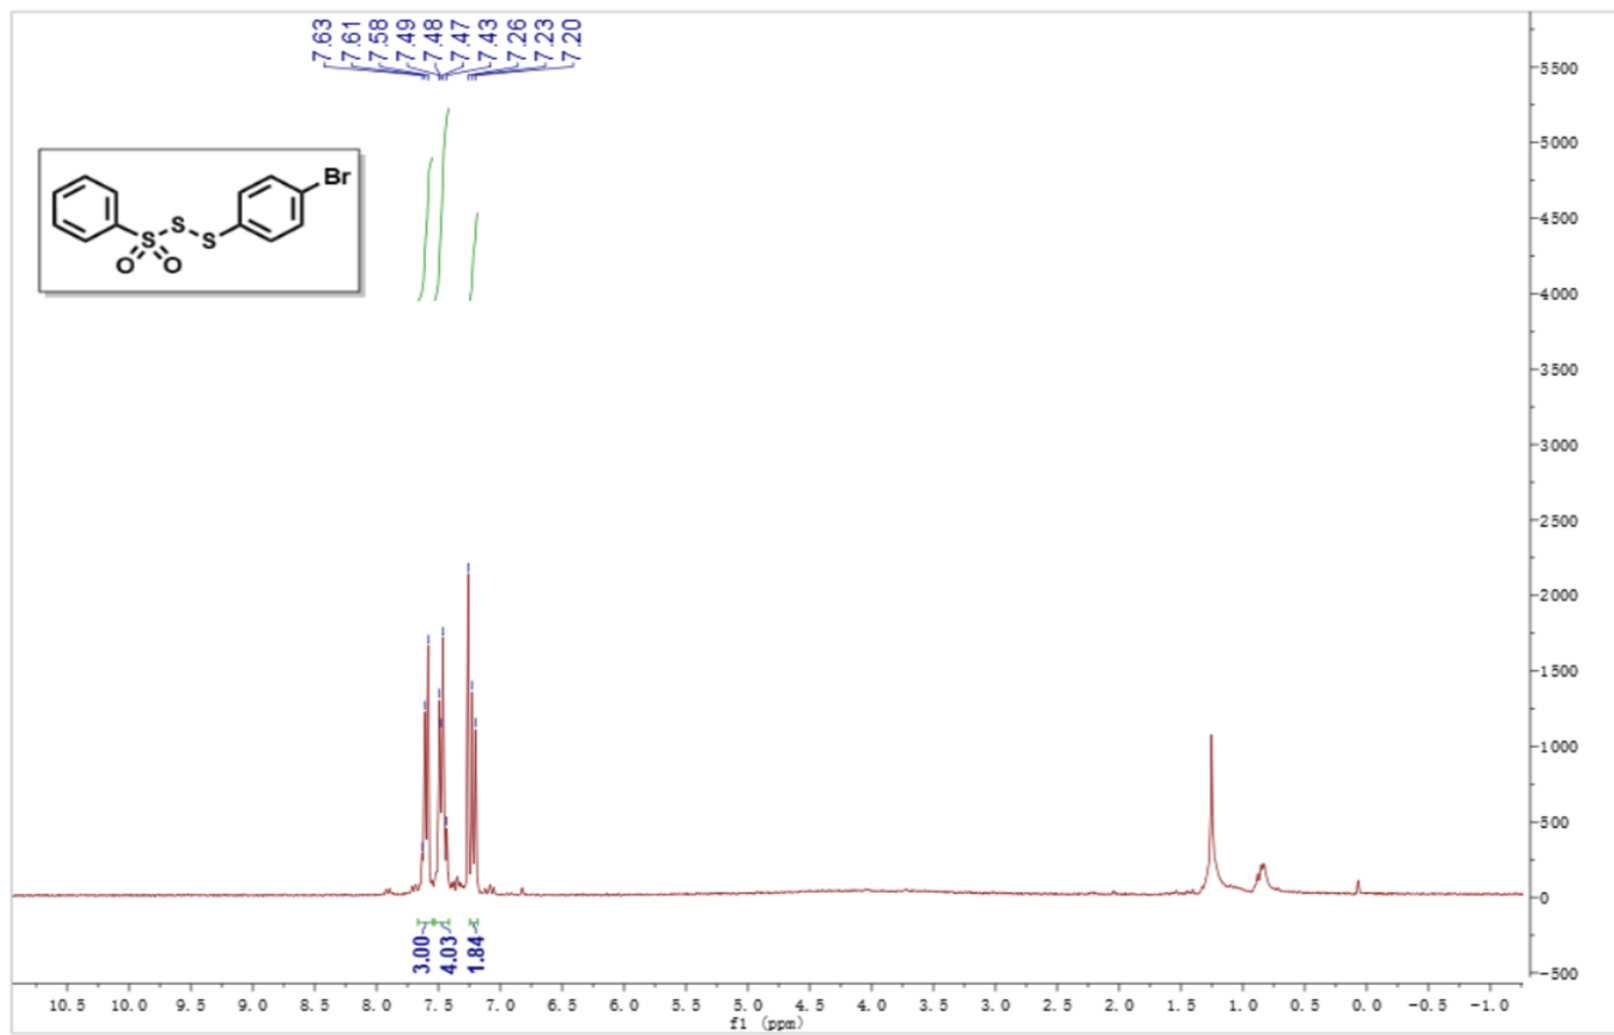

<sup>13</sup>C NMR of 3ac

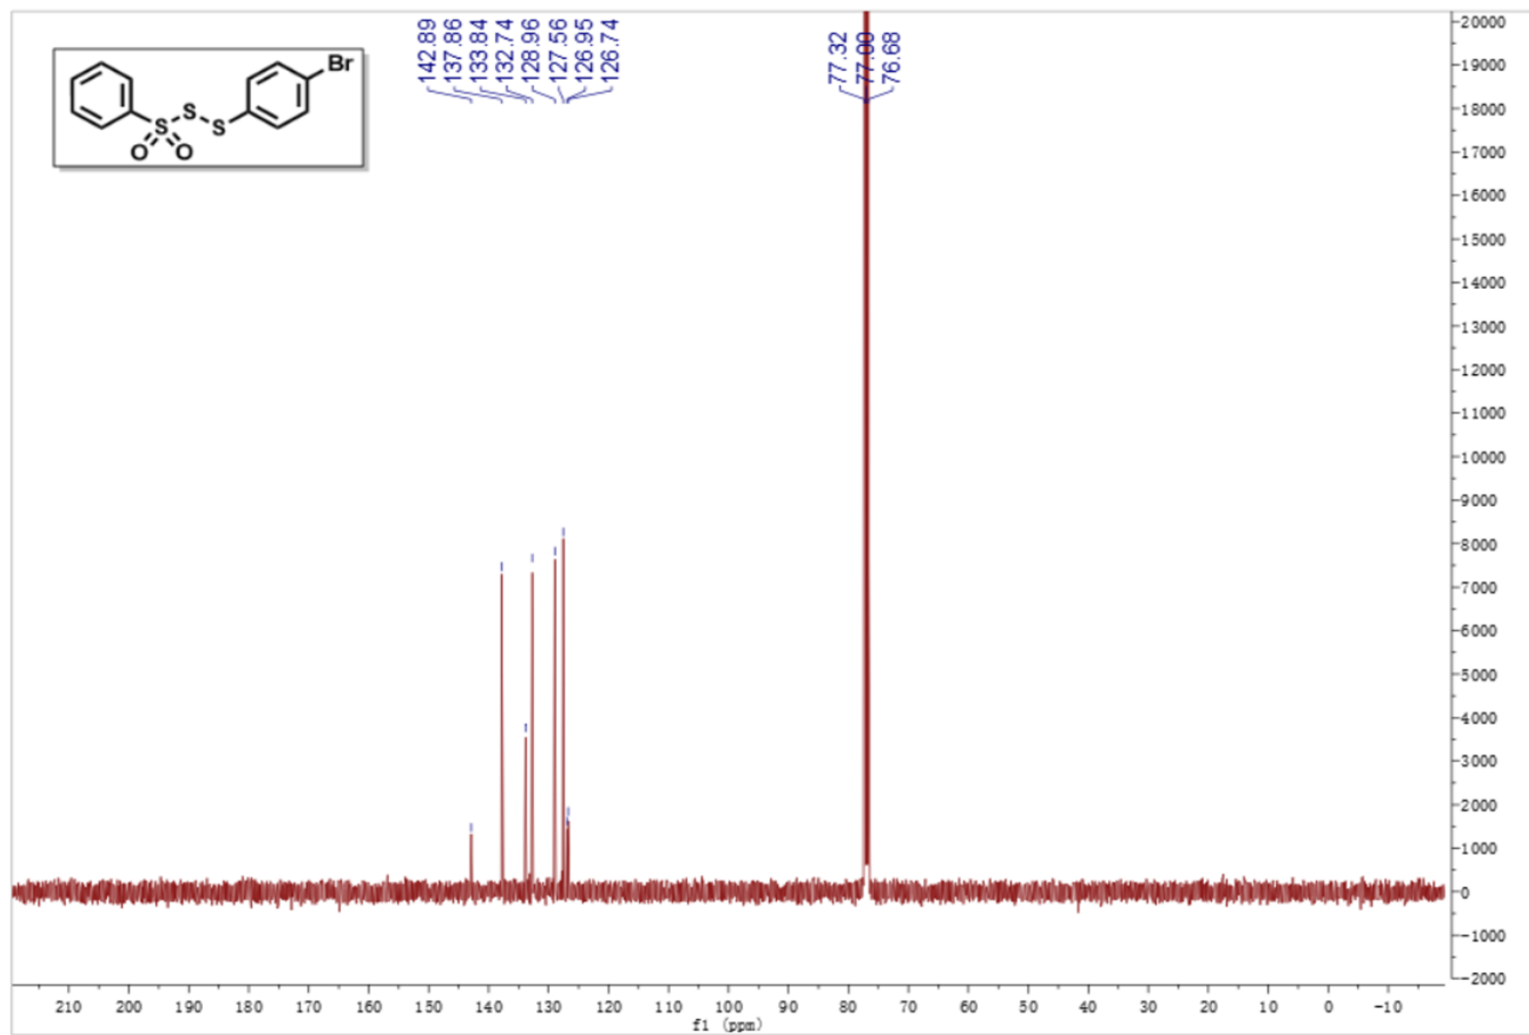

<sup>1</sup>H NMR of 3ad

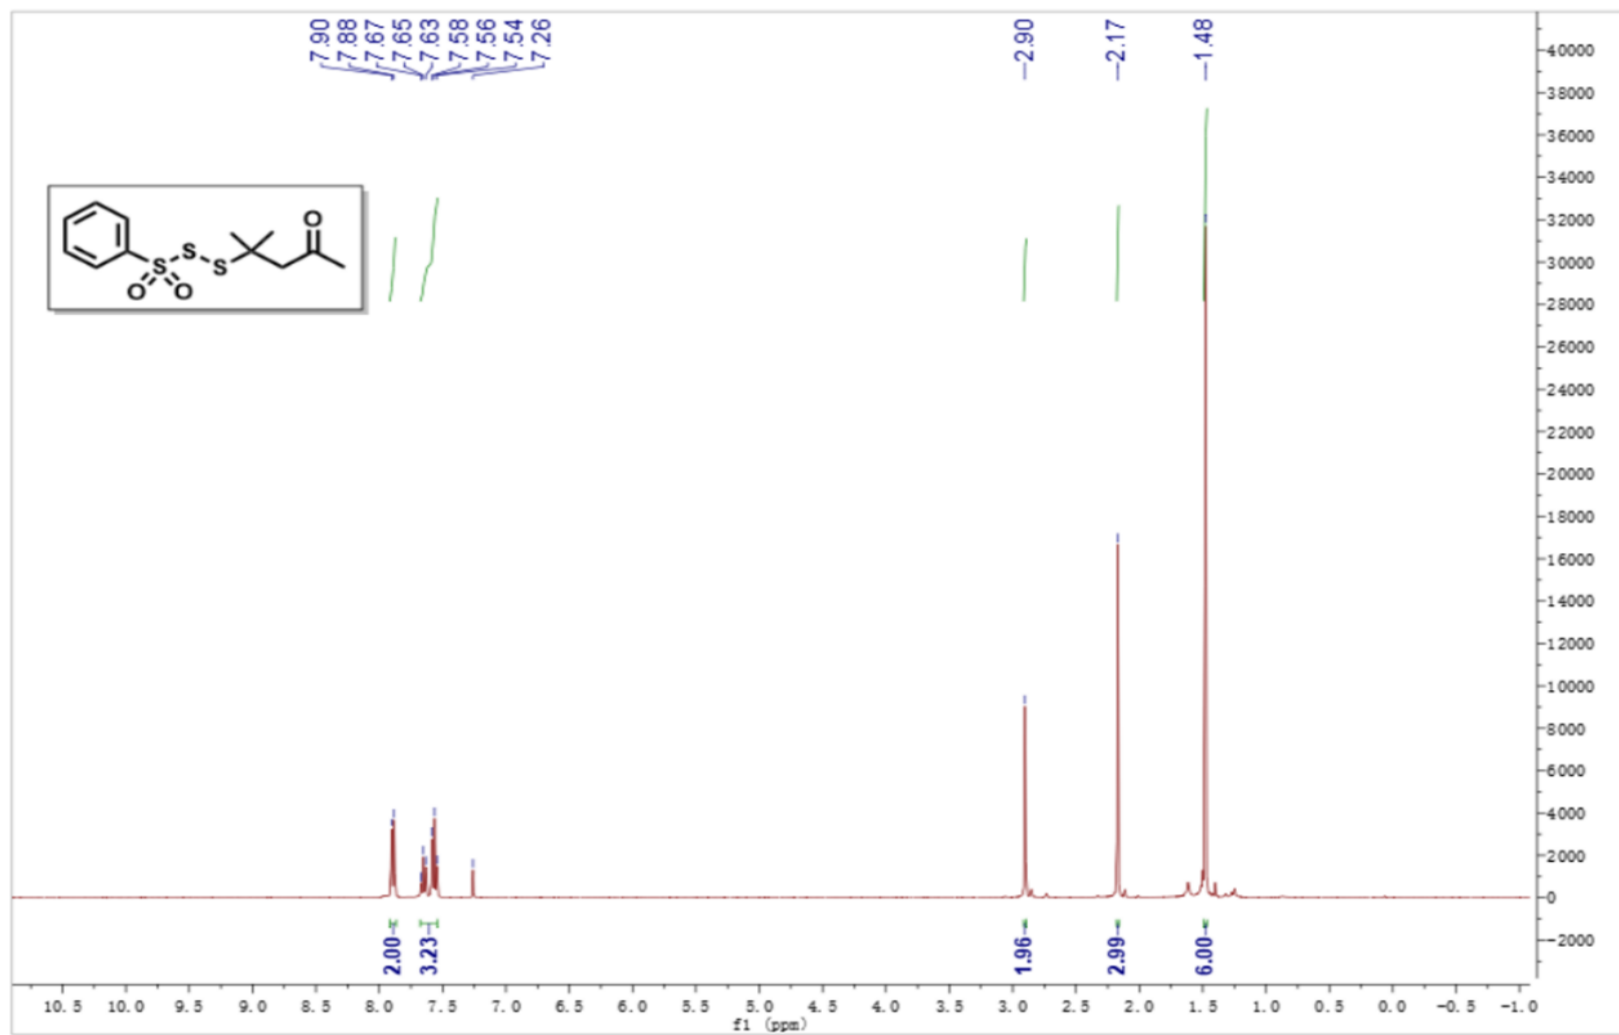

<sup>13</sup>C NMR of 3ad

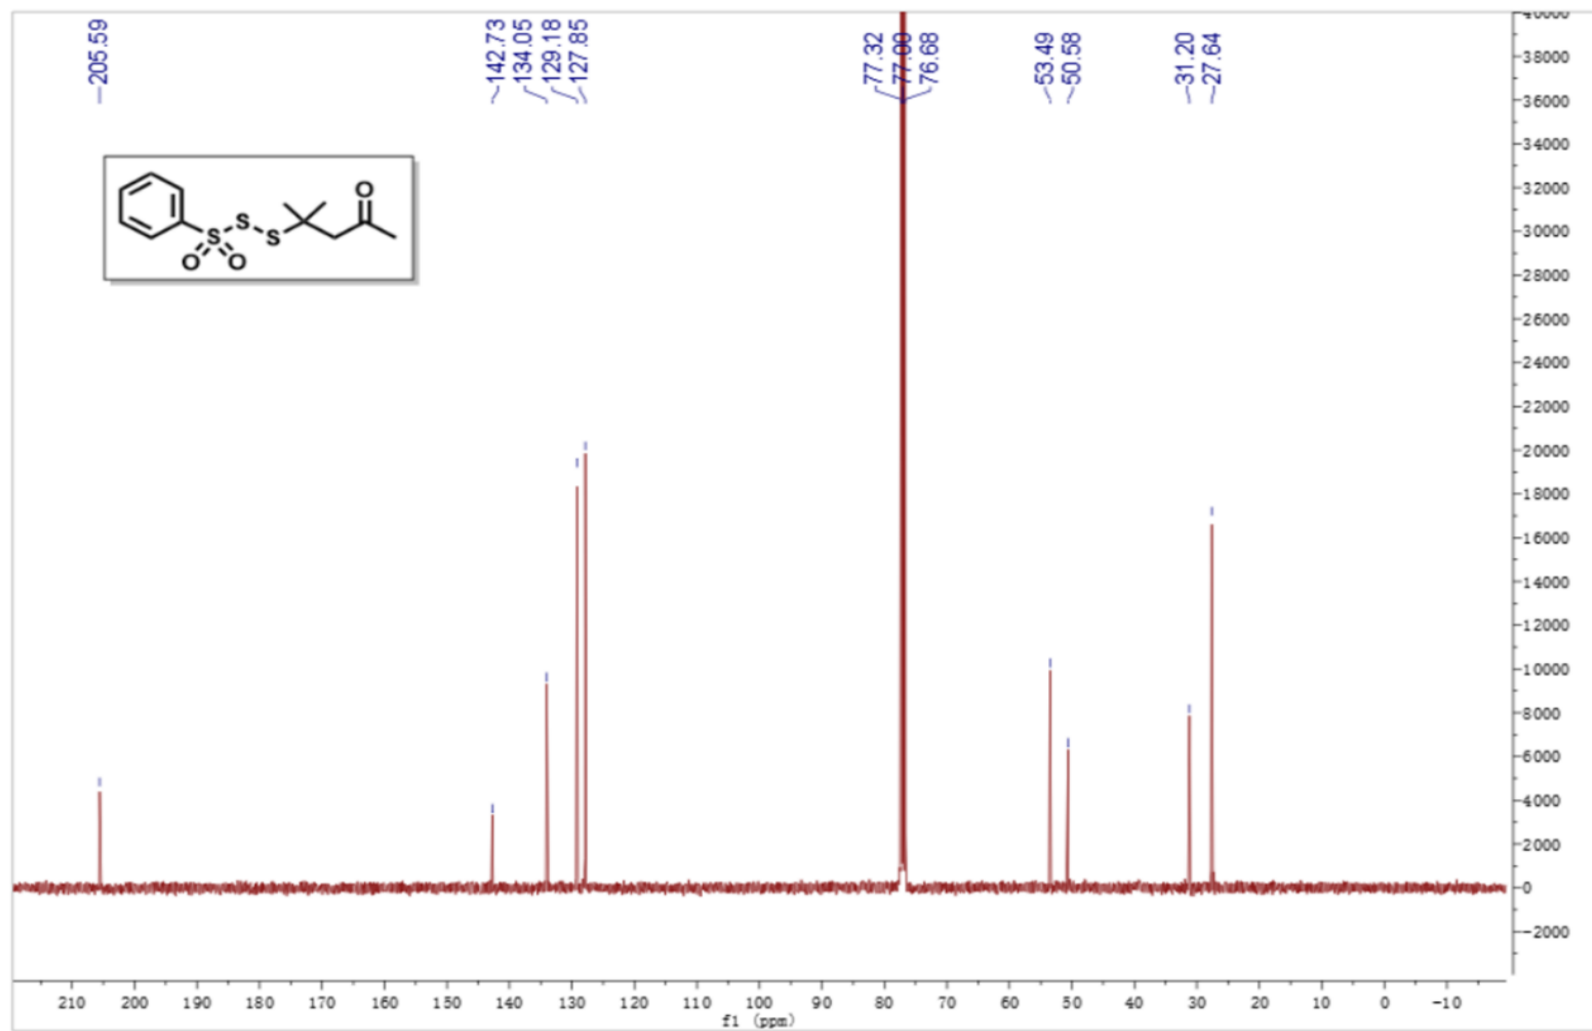



<sup>1</sup>H NMR of 3ae

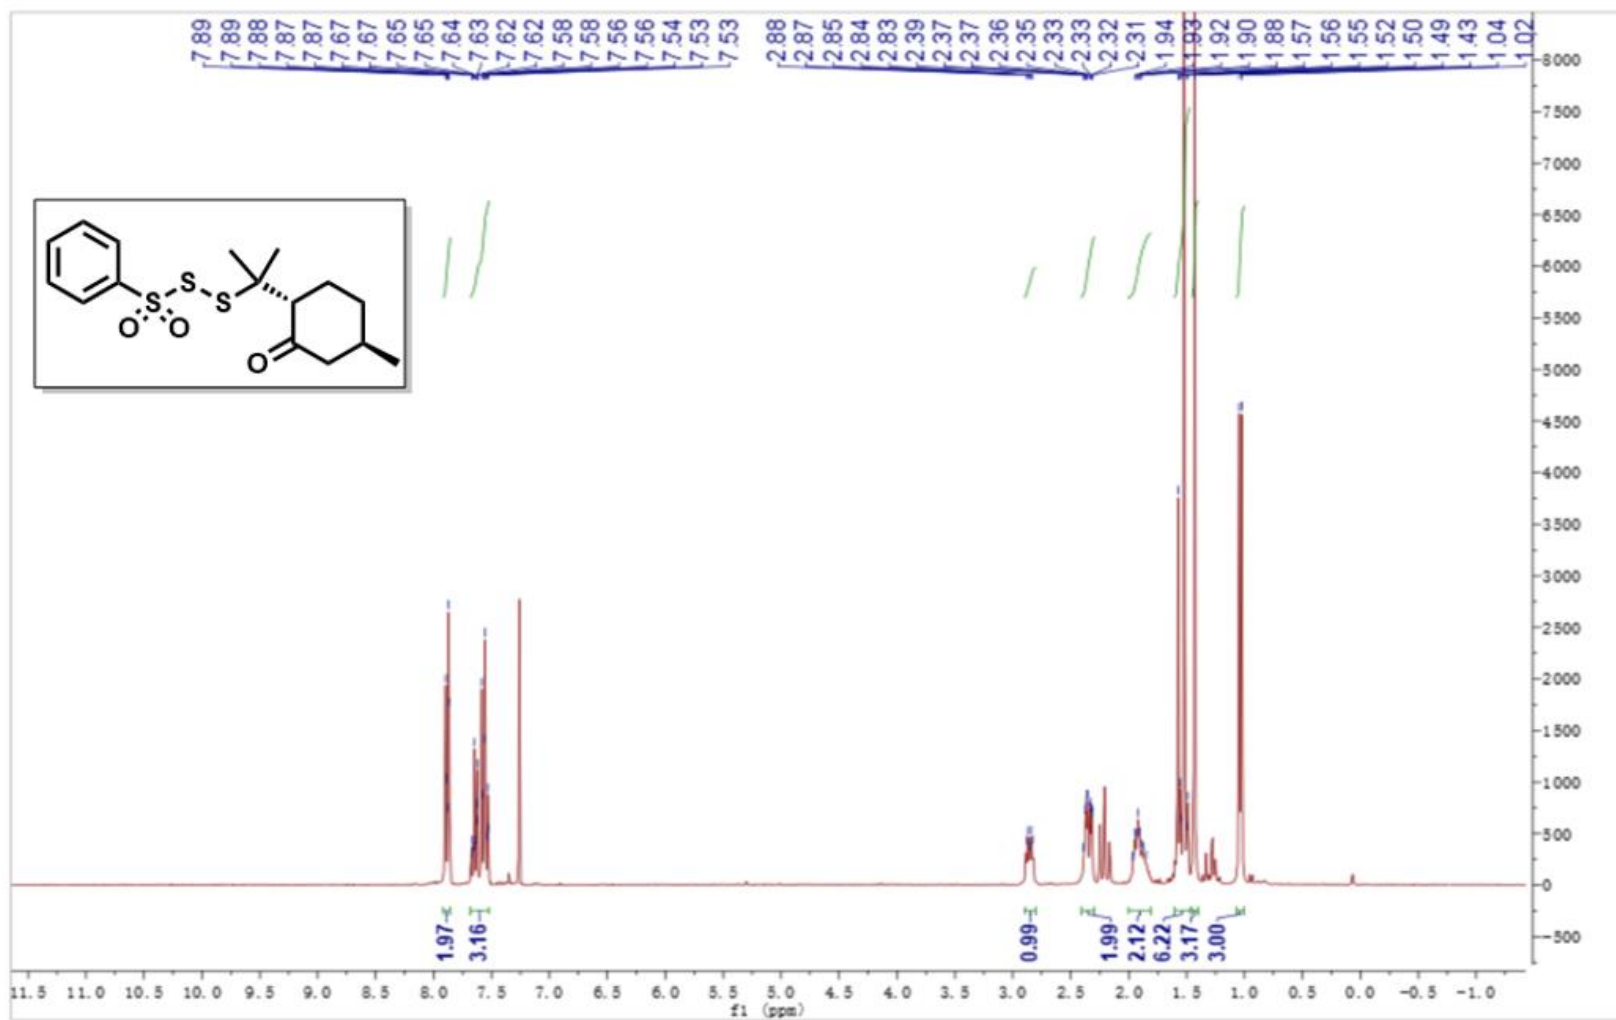

<sup>13</sup>C NMR of 3ae

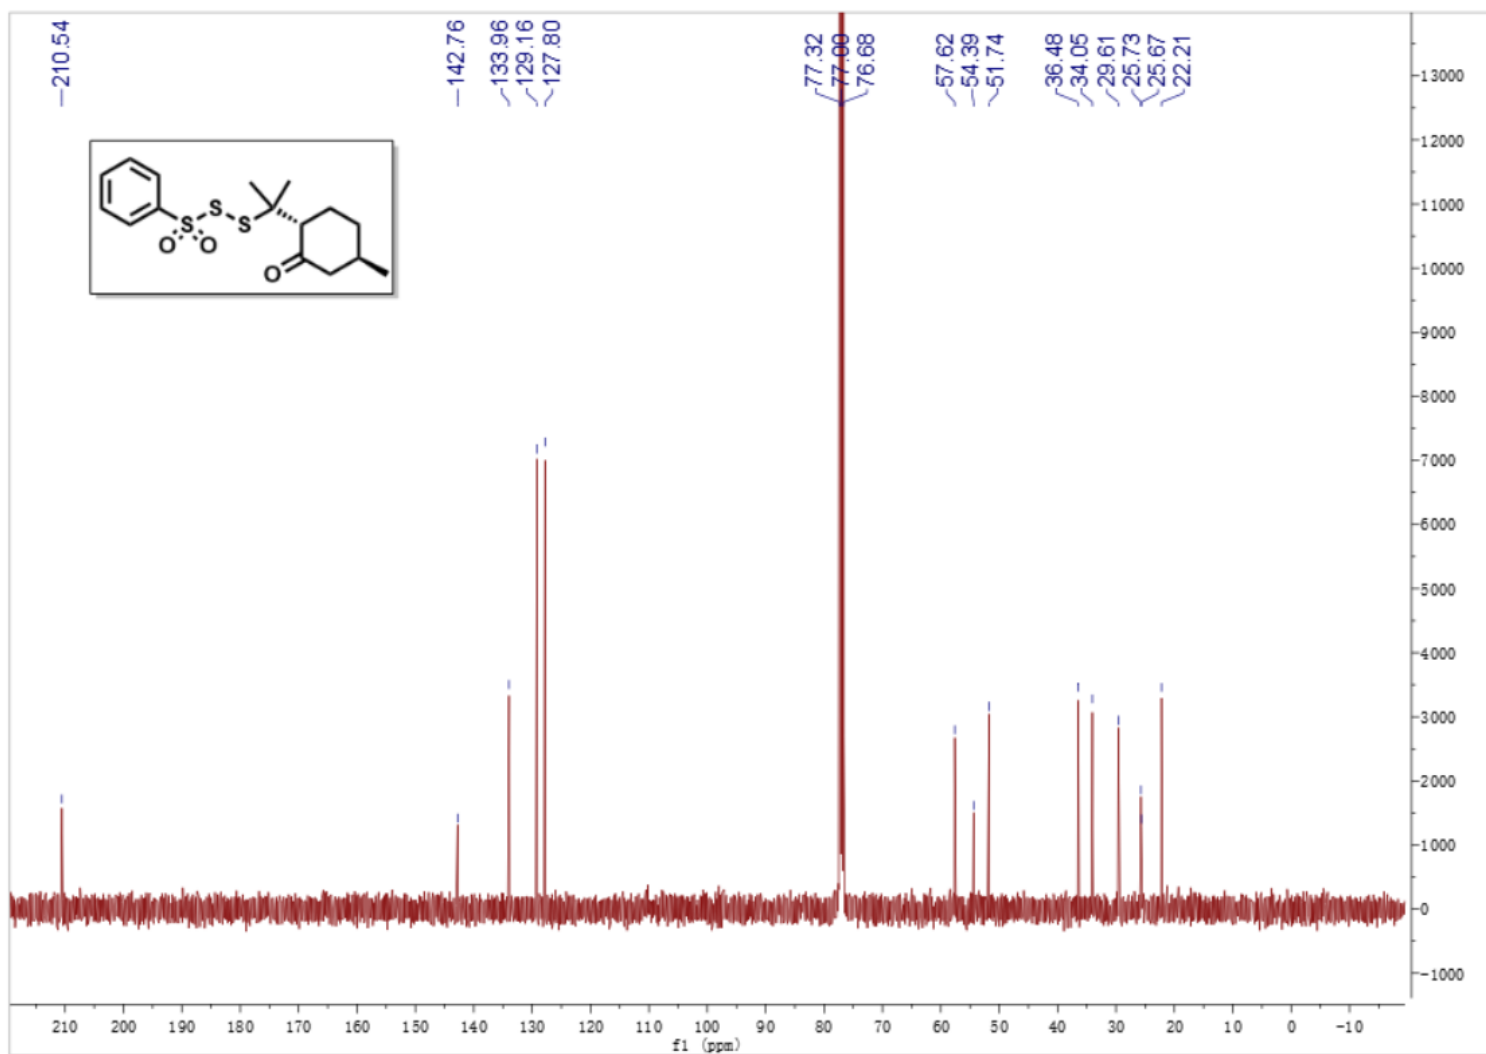

<sup>1</sup>H NMR of 3af

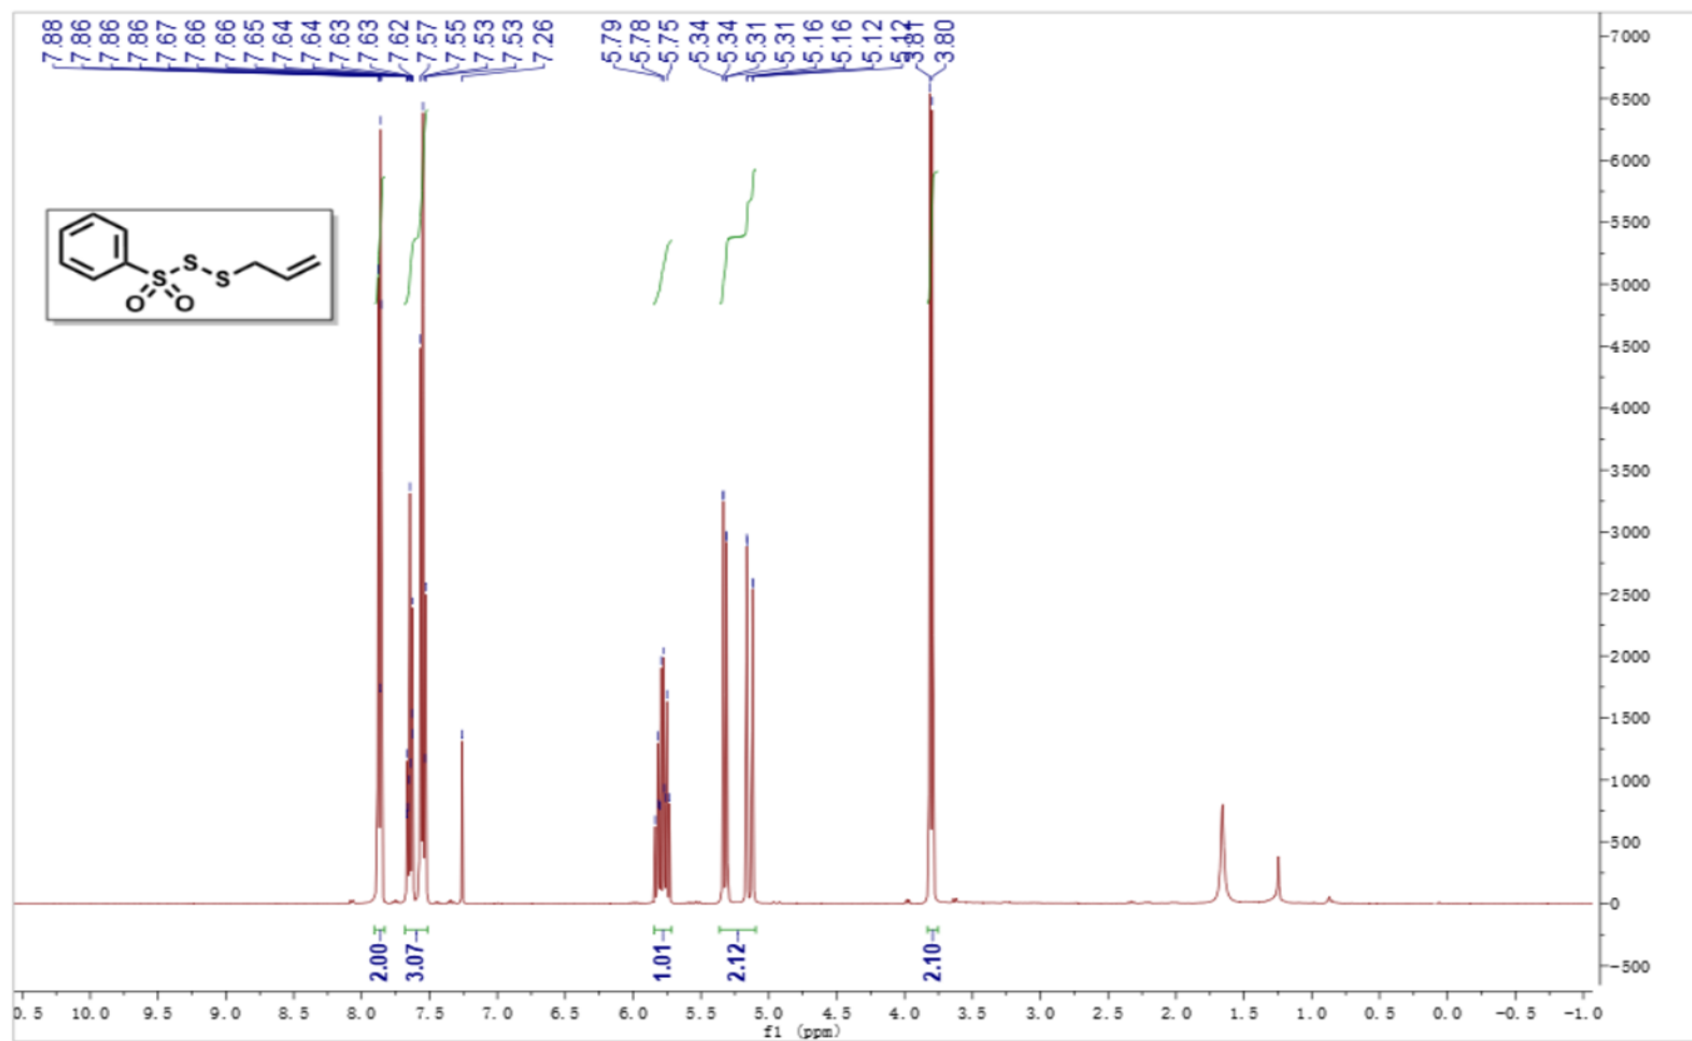

<sup>13</sup>C NMR of 3af

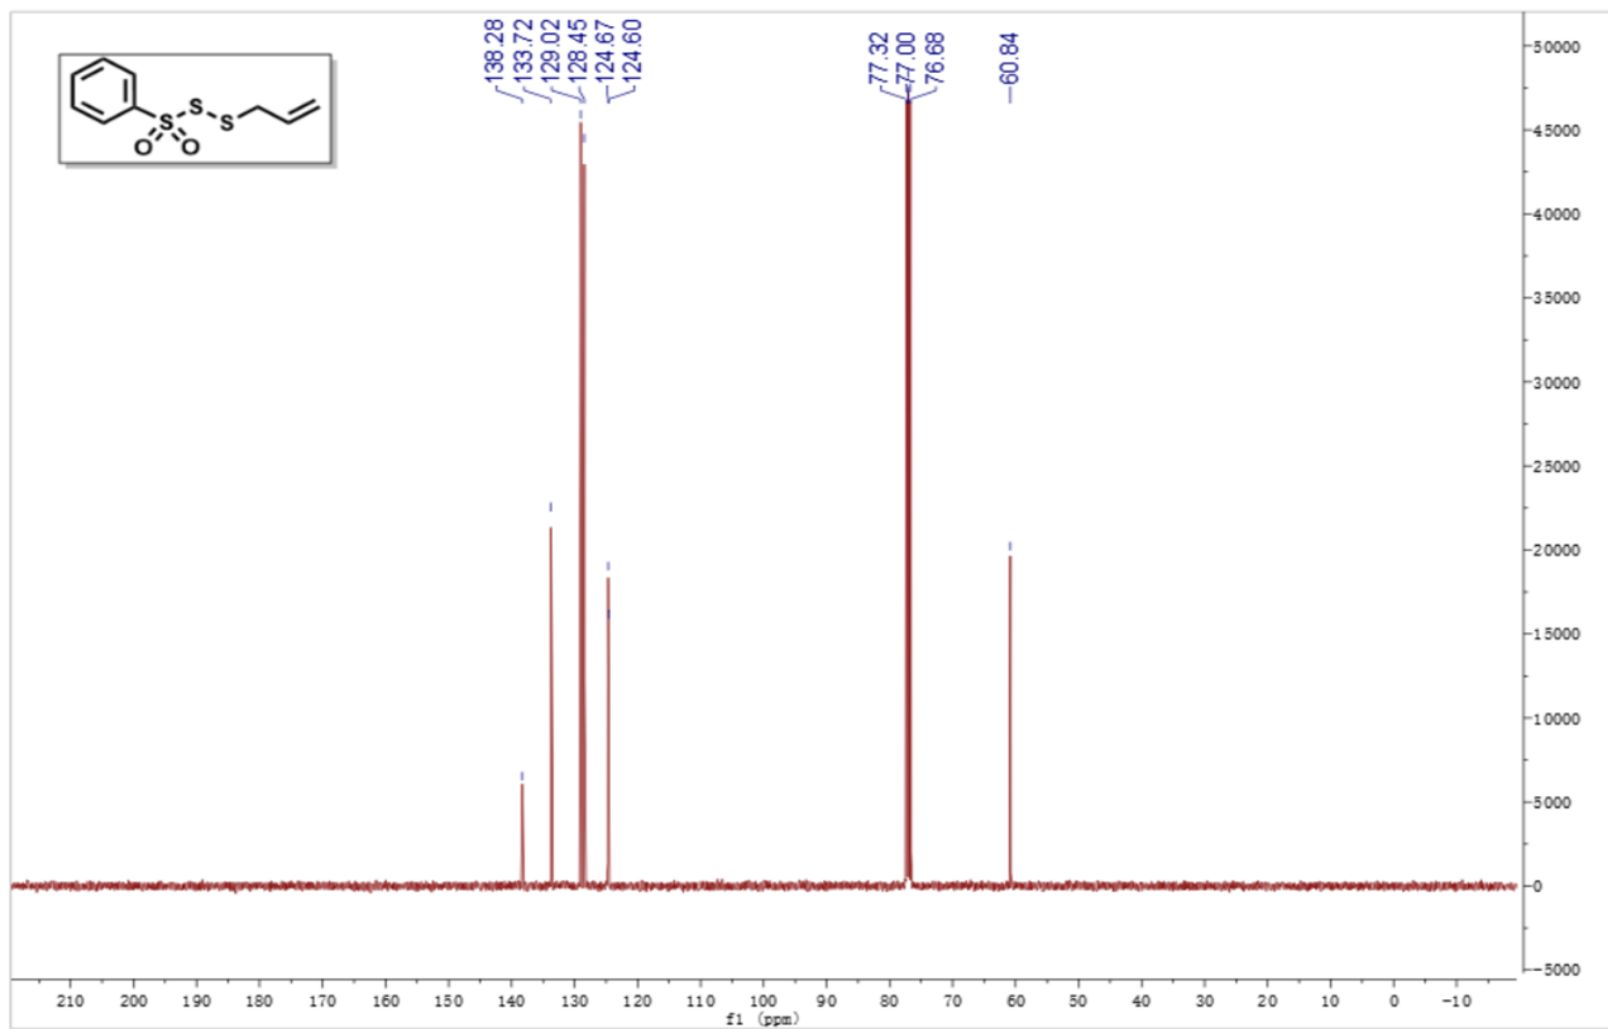

<sup>1</sup>H NMR of 3ag

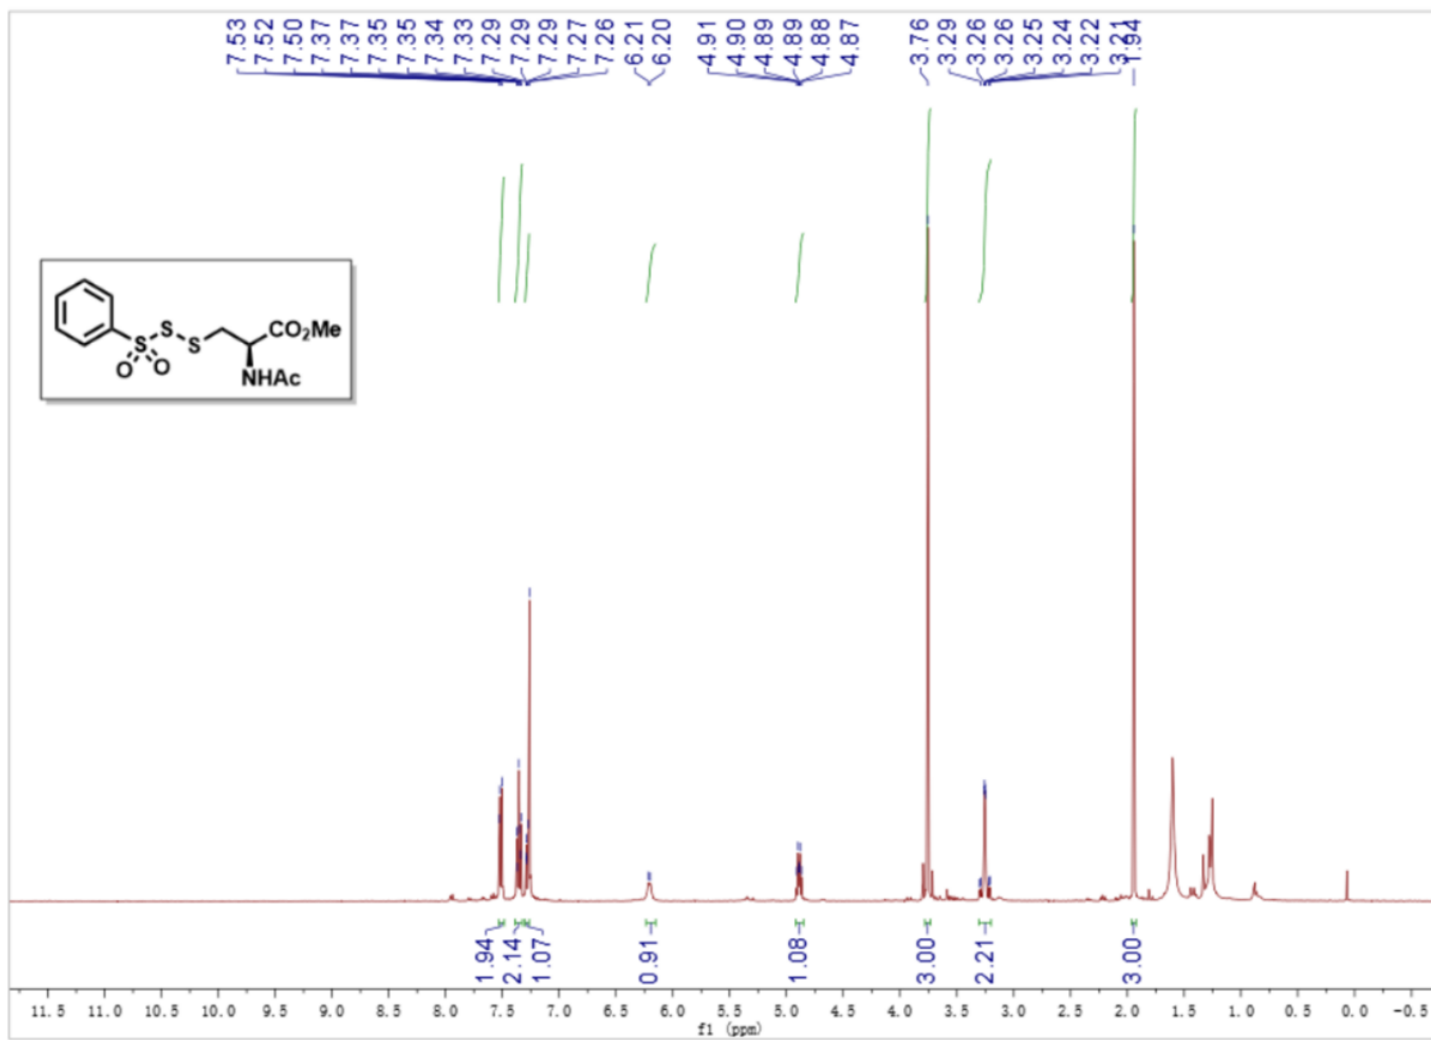

<sup>13</sup>C NMR of 3ag

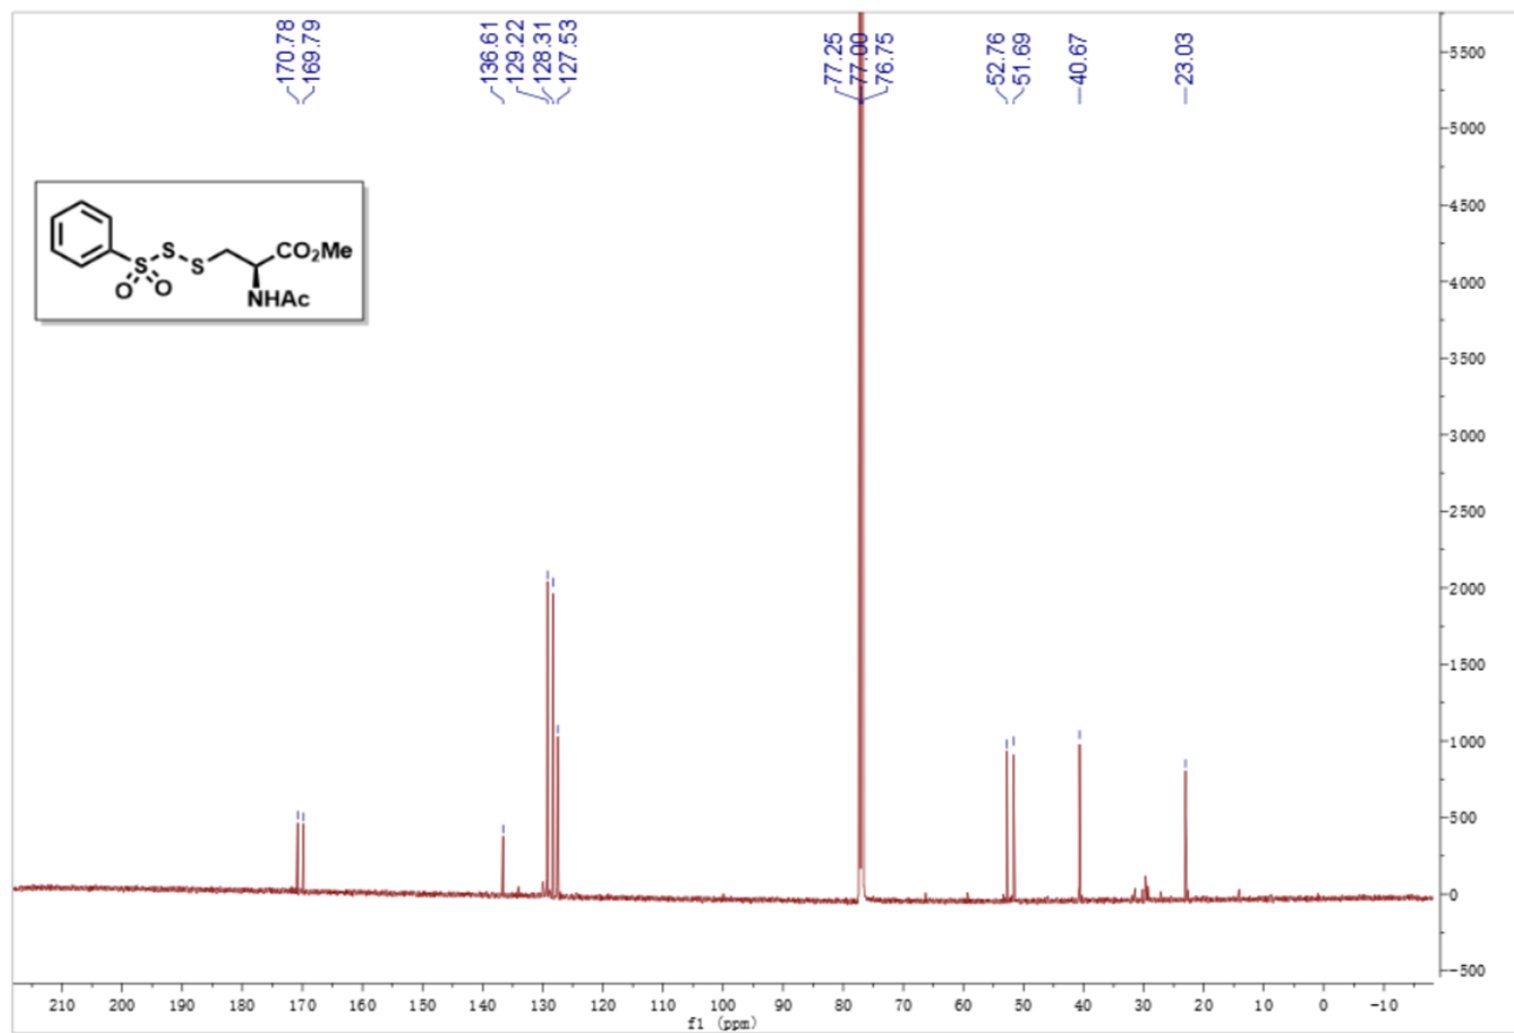

<sup>1</sup>H NMR of 3ah

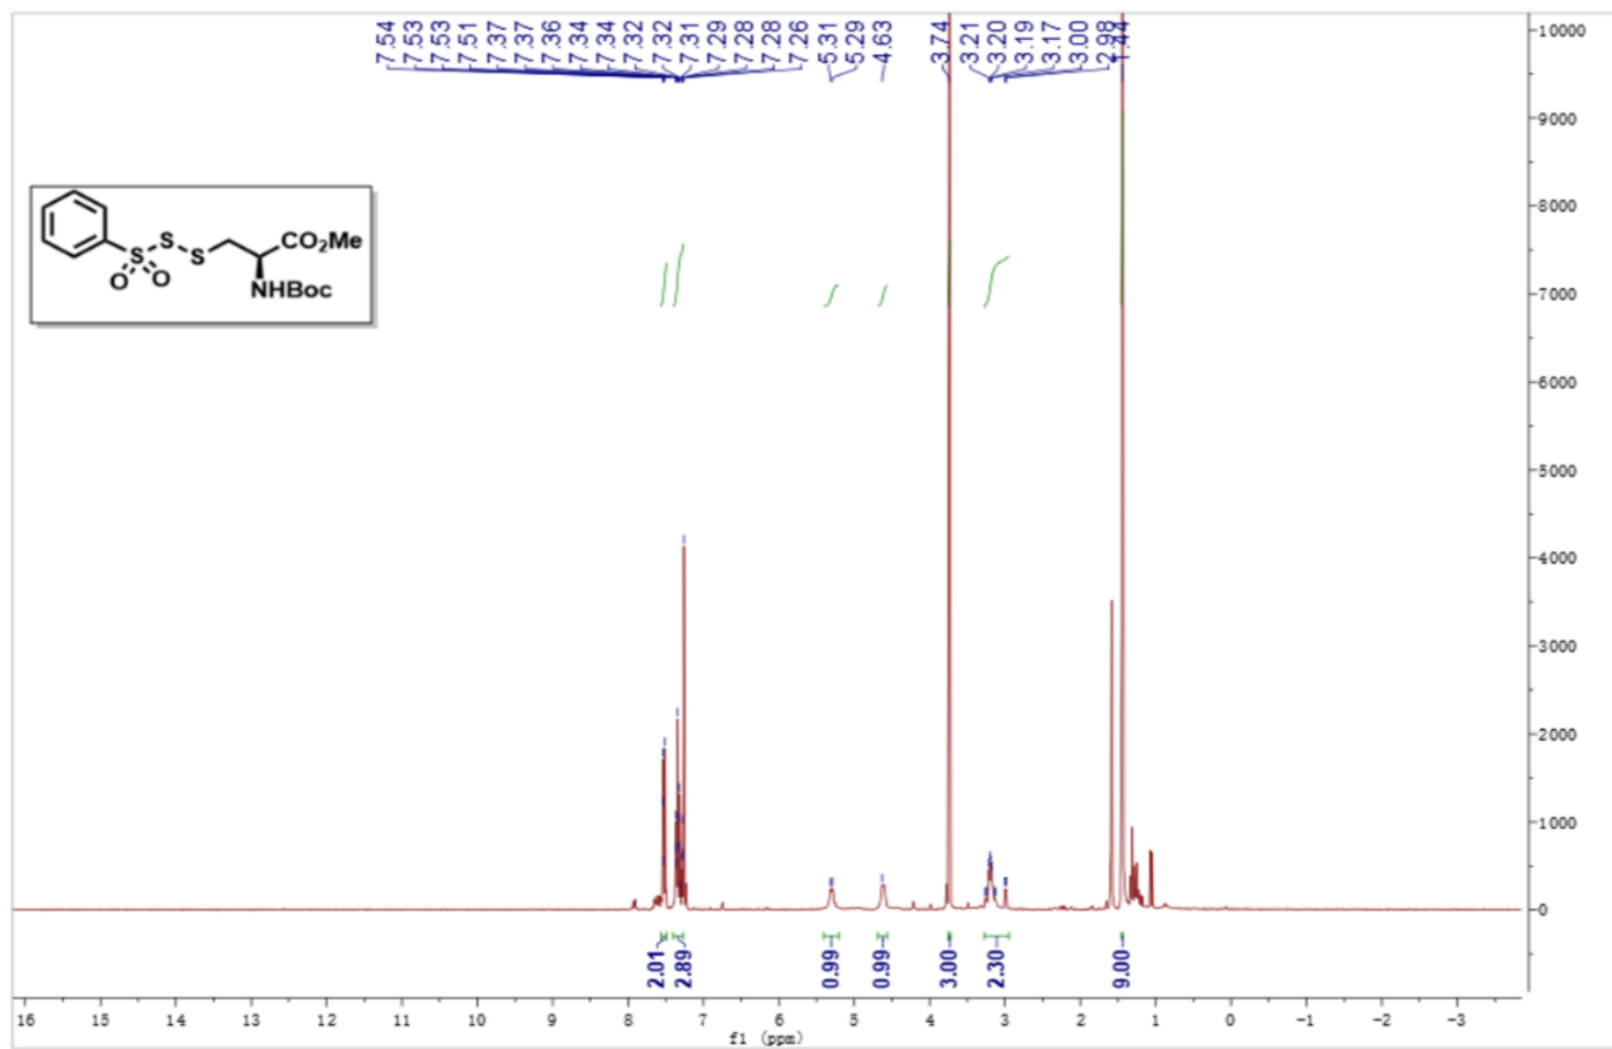

<sup>13</sup>C NMR of 3ah

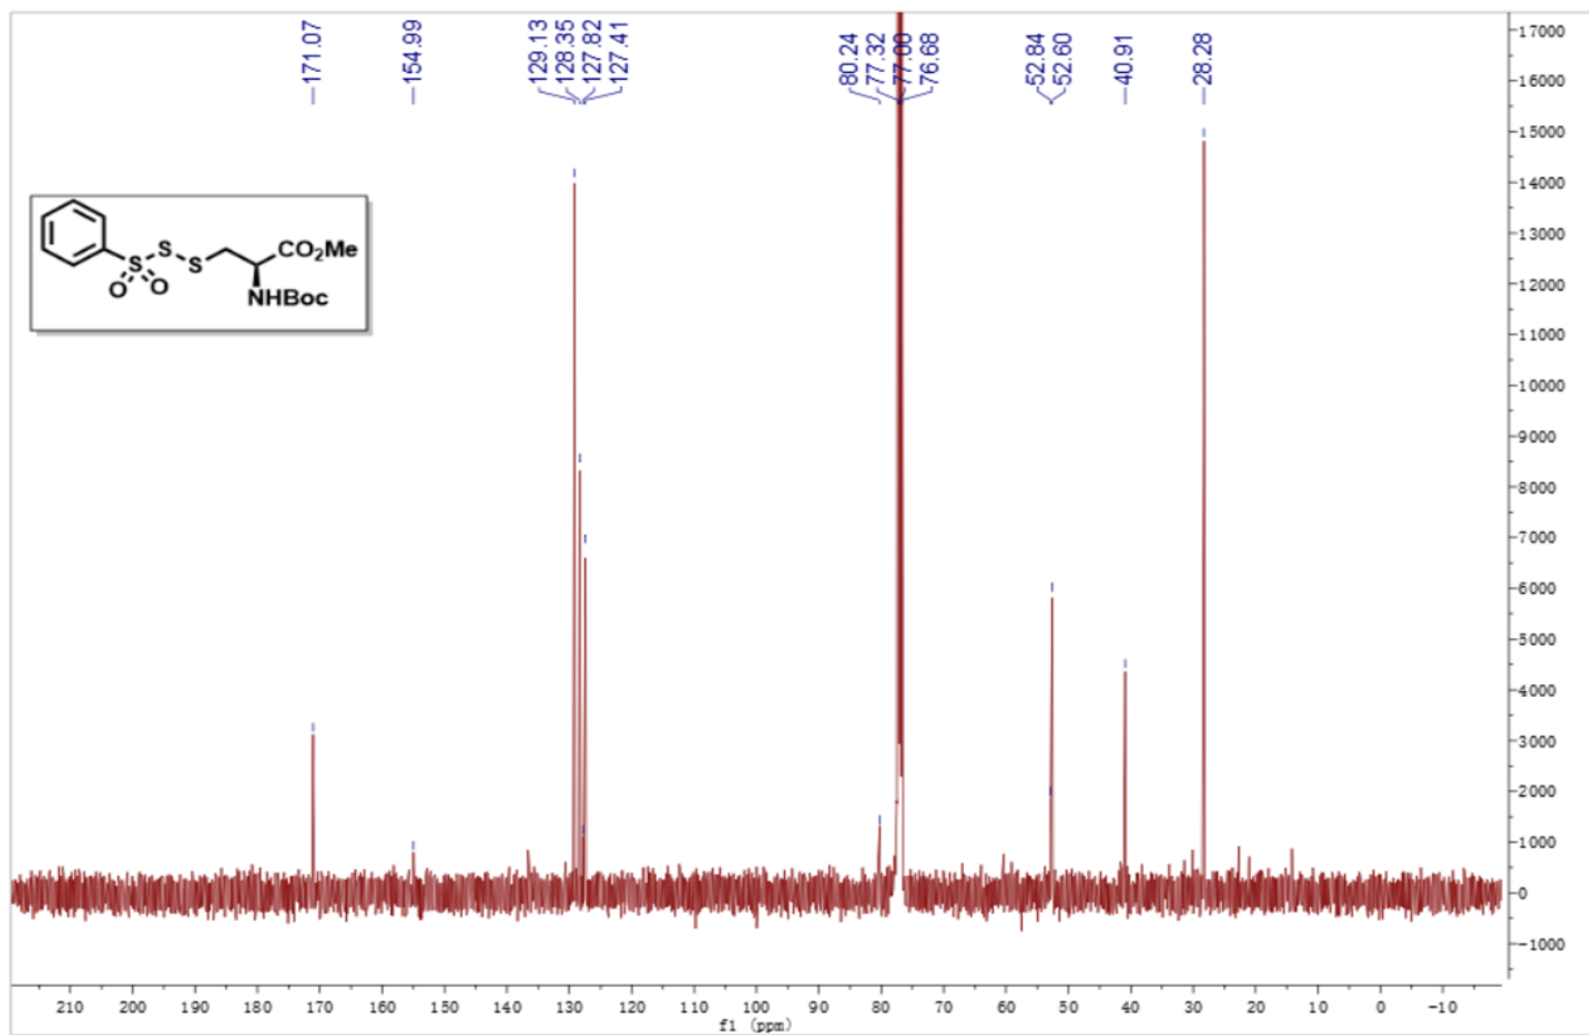



<sup>1</sup>H NMR of 3ai

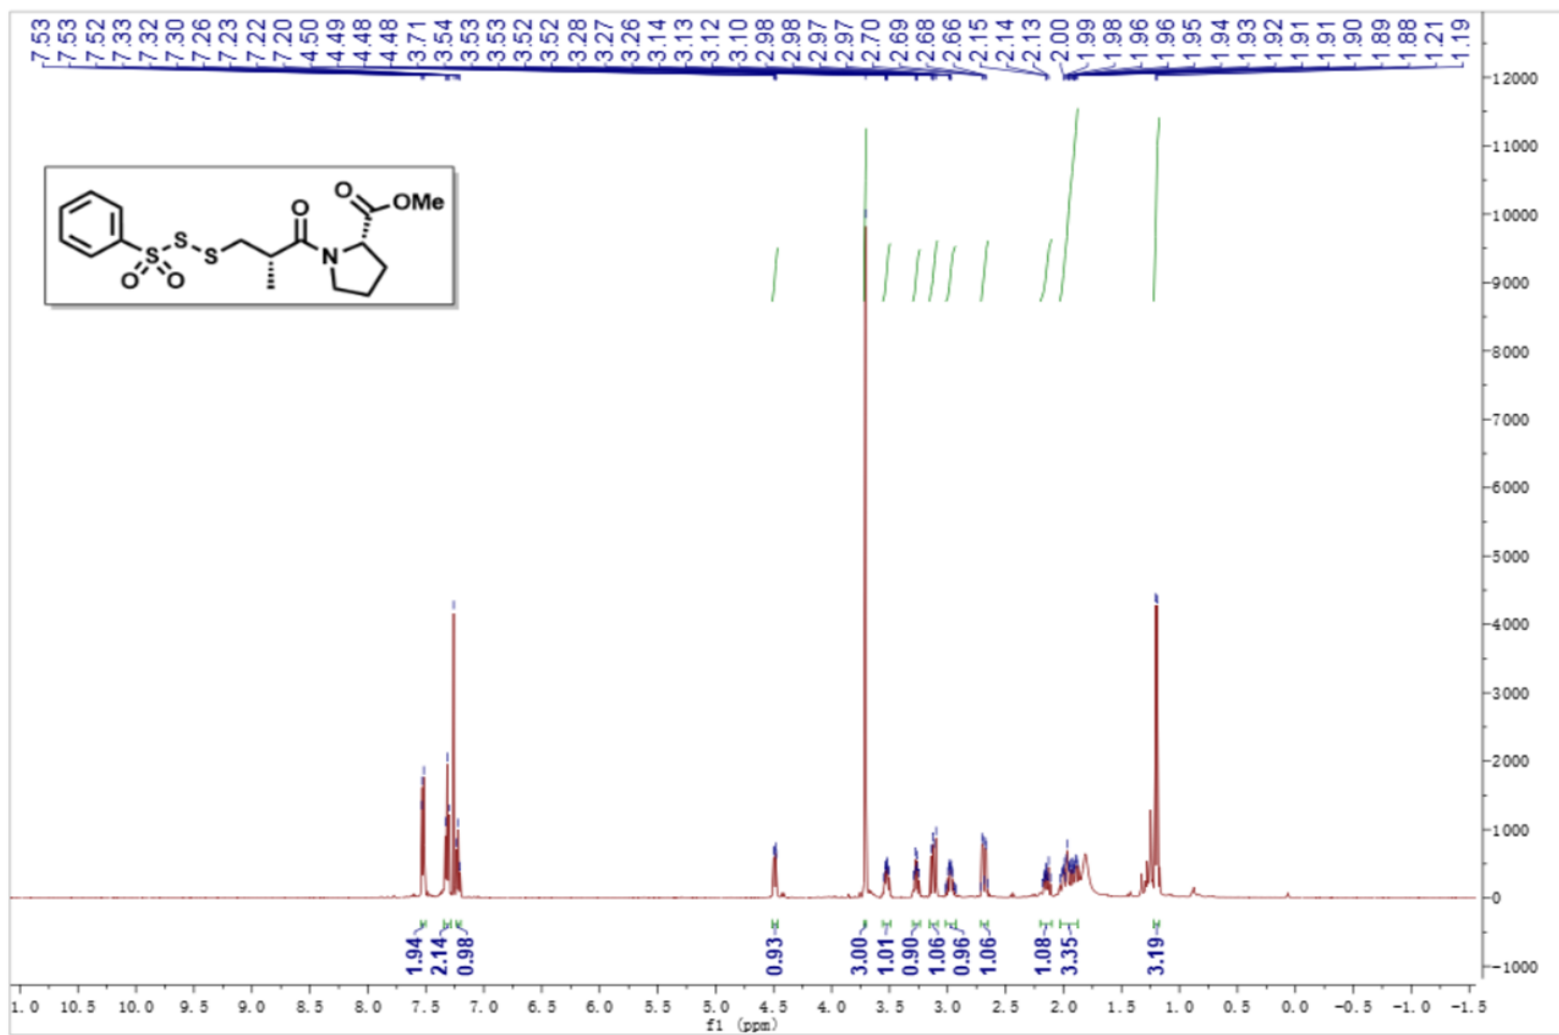

<sup>13</sup>C NMR of 3ai

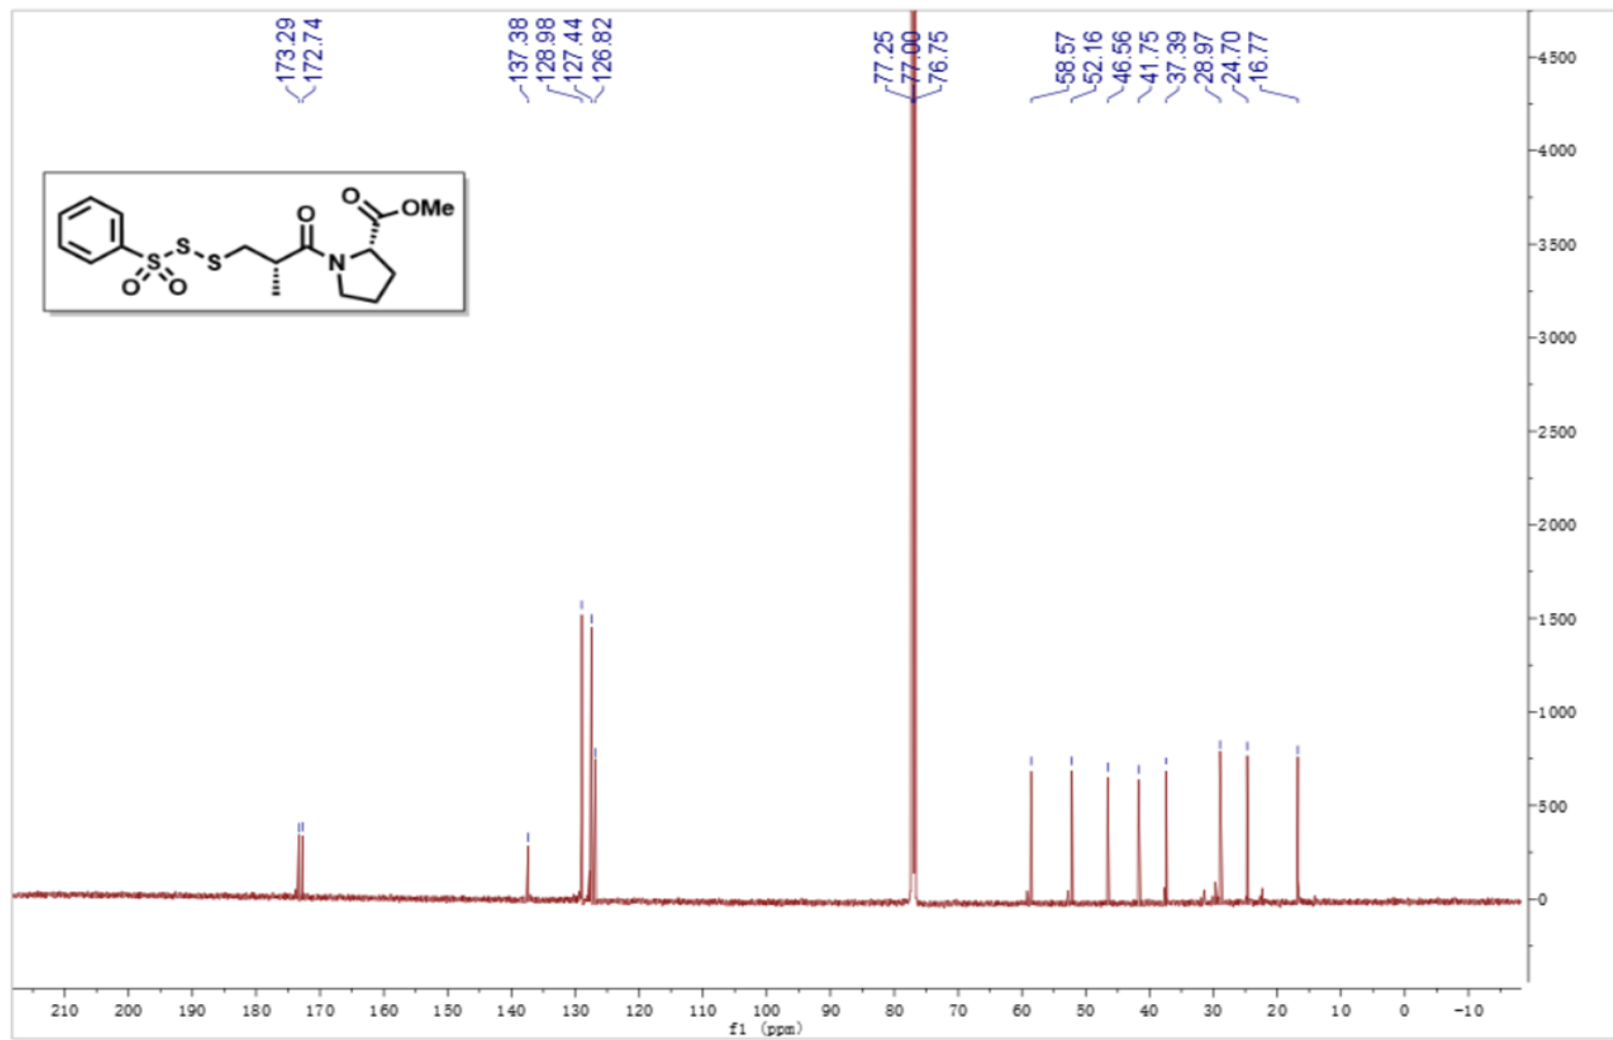

Supplement: d1gc03242a1.pdf [file d1gc03242a1.pdf]
